# Supplementary material for: Visible-light-induced indole synthesis via intramolecular C–N bond formation: desulfonylative C(sp2)–H functionalization
Source: Chem Sci. 2022 Sep 16;13(39):11623–32. doi: 10.1039/d2sc02822k (PMC9555724; doi:10.1039/d2sc02822k)
Supplement: SC-013-D2SC02822K-s001 [file SC-013-D2SC02822K-s001.pdf]

Supporting Information

**Visible-Light-Induced Indole Synthesis via Intramolecular C-N Bond Formation:  
Desulfonylative C(sp<sup>2</sup>)-H Functionalization**

**Quanzhe Li,<sup>a</sup> Xintao Gu,<sup>a</sup> Yin Wei<sup>\*a</sup> and Min Shi<sup>\*a,b</sup>**

<sup>a</sup> *State Key Laboratory of Organometallic Chemistry, Center for Excellence in Molecular Synthesis, Shanghai Institute of Organic Chemistry, University of Chinese Academy of Science, Chinese Academy of Sciences, 345 Lingling Road, Shanghai 200032 China. E-mail: [weiyin@sioc.ac.cn](mailto:weiyin@sioc.ac.cn), [mshi@mail.sioc.ac.cn](mailto:mshi@mail.sioc.ac.cn).*

<sup>b</sup> *Key Laboratory for Advanced Materials and Institute of Fine Chemicals, School of Chemistry & Molecular Engineering, East China University of Science and Technology, 130 Meilong Road, Shanghai 200237, China. E-mail: [mshi@mail.sioc.ac.cn](mailto:mshi@mail.sioc.ac.cn).*

## CONTENTS

|                                                           |      |
|-----------------------------------------------------------|------|
| 1. General Remarks.....                                   | S3   |
| 2. Optimization of Reaction Conditions.....               | S4   |
| 3. Reaction Setup.....                                    | S7   |
| 4. General Procedure for the Synthesis of Substrates..... | S8   |
| 5. General Procedure for the Synthesis of Products.....   | S29  |
| 6. Mechanistic Investigations.....                        | S34  |
| 7. KIE Experiment.....                                    | S60  |
| 8. Characterization Data of Substrates.....               | S62  |
| 9. Characterization Data of Products.....                 | S192 |
| 10. Computational Studies.....                            | S268 |
| 11. X-ray Data.....                                       | S281 |
| 12. References.....                                       | S282 |

## 1. General Remarks

$^1\text{H}$  NMR spectra were recorded on a Varian Mercury-400 spectrometer for solution in  $\text{CDCl}_3$  with tetramethylsilane (TMS) as an internal standard; coupling constants  $J$  are given in Hz.  $^{13}\text{C}$  NMR spectra were recorded on a Varian Mercury-400 spectrophotometers (101 MHz) with complete proton decoupling spectrophotometers ( $\text{CDCl}_3$ : 77.0 ppm). Mass 1gand HRMS spectra were recorded by ESI, EI, DART or FI method. Organic solvents used were dried by standard methods when necessary. Infrared spectra were recorded on a Perkin-Elmer PE-983 spectrometer with absorption in  $\text{cm}^{-1}$ . Melting points were determined on a digital melting point apparatus and temperatures were uncorrected. The reactions were carried out in oil bath. Commercially obtained reagents were used without further purification. All these reactions were monitored by TLC with silica gel coated plates. Flash column chromatography was carried out using silica gel at increased pressure.

## 2. Optimization of Reaction Conditions

**Table S1:** Optimization of the catalysts for the production of **2a**

| entry <sup>a</sup> | PC (5.0 mol%)                                                                         | additive       | LED           | yield <sup>b</sup> (%) |
|--------------------|---------------------------------------------------------------------------------------|----------------|---------------|------------------------|
| 1                  | (Ir[dFppy] <sub>2</sub> (dtbpy))PF <sub>6</sub>                                       | -              | 365 nm        | -                      |
| 2                  | 4CZIPN                                                                                | -              | 365 nm        | -                      |
| 3                  | xanthone                                                                              | -              | 365 nm        | 15                     |
| 4                  | thioxanthone                                                                          | -              | 365 nm        | -                      |
| 5                  | <i>fac</i> -Ir(ppy) <sub>3</sub>                                                      | -              | 365 nm        | -                      |
| 6 <sup>c</sup>     | xanthone                                                                              | Hantzsch ester | 365 nm        | -                      |
| 7 <sup>c</sup>     | xanthone                                                                              | DIPEA          | 365 nm        | -                      |
| 8                  | xanthone (dark)                                                                       | -              | 365 nm        | -                      |
| 9                  | acetone                                                                               | -              | 365 nm        | <5                     |
| 10                 | PC 1                                                                                  | -              | 365 nm        | 79                     |
| <b>11</b>          | <b>PC 2</b>                                                                           | -              | <b>365 nm</b> | <b>88</b>              |
| 12                 | PC 3                                                                                  | -              | 365 nm        | -                      |
| 13                 | PC 4                                                                                  | -              | 365 nm        | -                      |
| 14                 | [Ir(dF(CF <sub>3</sub> ppy) <sub>2</sub> )(5,5'-CF <sub>3</sub> -bpy)]PF <sub>6</sub> | -              | 385 nm        | 39                     |
| 15 <sup>c</sup>    | PC 2                                                                                  | Hantzsch ester | 365 nm        | -                      |
| 16 <sup>c</sup>    | PC 2                                                                                  | DIPEA          | 365 nm        | 29                     |

PC 1

PC 3

PC 4

<sup>a</sup> Reaction conditions: **1a** (0.1 mmol) and **PC** (5.0 mol%) were added in degassed MeCN (2.0 mL) under Ar atmosphere for 12.0 h, in a sealed tube using 365 nm or 385 nm LED light irradiation. <sup>b</sup> NMR yield using 1,3,5-trimethoxybenzene as an internal standard. <sup>c</sup> Additive (0.2 mmol) was used.

**Table S2:** Optimization of the amount of **PC 2** and optimal light source for the production of **2a**

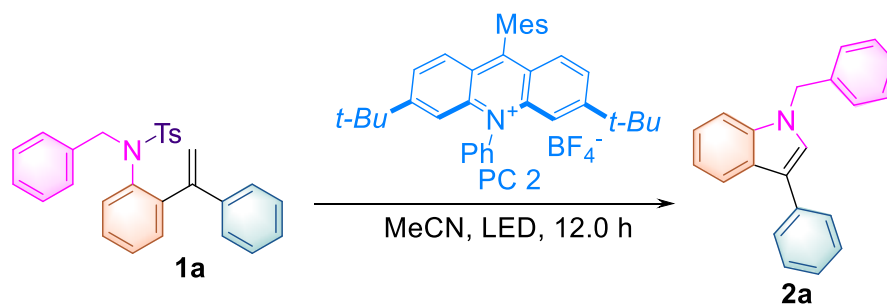

| entry <sup>a</sup> | PC 2 (mol%) | LED           | yield <sup>b</sup> (%)     |
|--------------------|-------------|---------------|----------------------------|
| 1                  | 5.0         | 365 nm        | 88                         |
| 2                  | 5.0         | 385 nm        | 90                         |
| 3                  | 5.0         | blue (100 W)  | 88                         |
| 4                  | 5.0         | blue (12 W)   | -                          |
| 5                  | 1.0         | 385 nm        | 83                         |
| <b>6</b>           | <b>2.0</b>  | <b>385 nm</b> | <b>91 (90)<sup>c</sup></b> |
| 7                  | 3.0         | 385 nm        | 81                         |
| 8                  | 4.0         | 385 nm        | 83                         |
| 9                  | -           | 385 nm        | -                          |
| 10 <sup>d</sup>    | 2.0         | -             | -                          |

<sup>a</sup> Reaction conditions: **1a** (0.1 mmol) and **PC 2** were added in degassed MeCN (2.0 mL) under Ar atmosphere for 12.0 h, in a sealed tube using LED light irradiation. <sup>b</sup> NMR yield using 1,3,5-trimethoxybenzene as an internal standard. <sup>c</sup> Yield of the isolated products. <sup>d</sup> Under dark condition.

**Table S3:** Optimization of the solvents for the production of **2a**

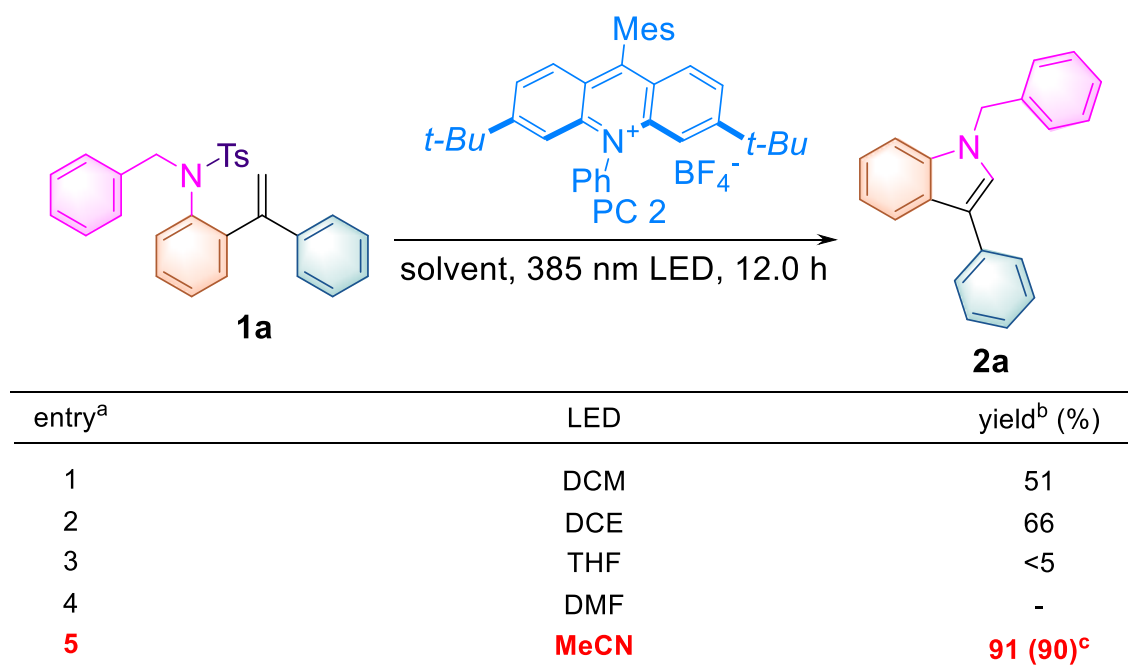

<sup>a</sup> Reaction conditions: **1a** (0.1 mmol) and **PC 2** (2.0 mol%) were added in degassed solvent (2.0 mL) under Ar atmosphere for 12.0 h, in a sealed tube using 385 nm LED light irradiation. <sup>b</sup> NMR yield using 1,3,5-trimethoxybenzene as an internal standard. <sup>c</sup> Yield of the isolated products.

### 3. Reaction Setup

Photoreactor scaled as 12 W 385 nm LED.

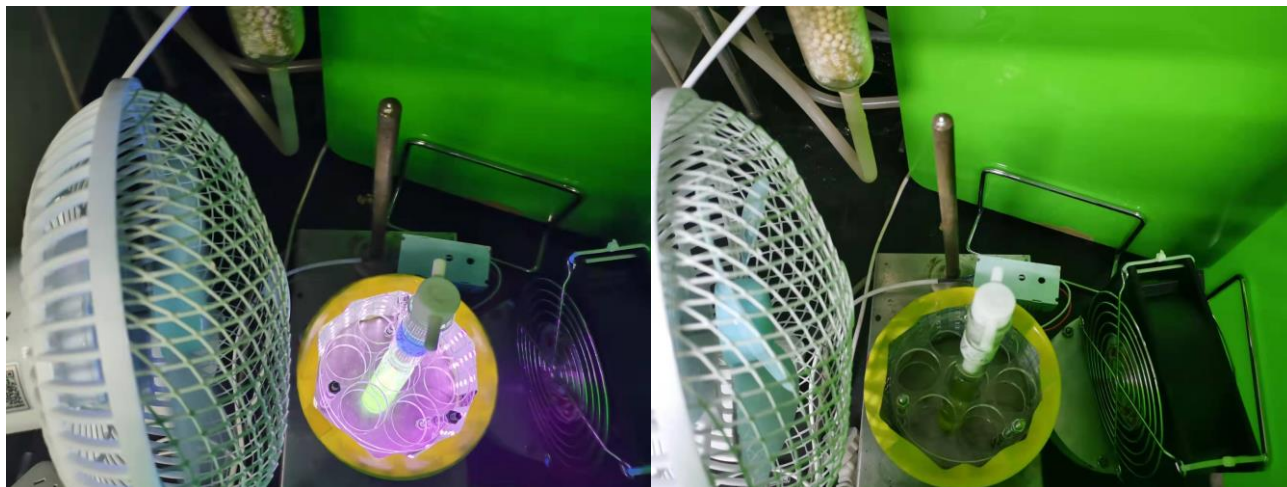

Photoreactor scaled as 100 W BLUE LED.

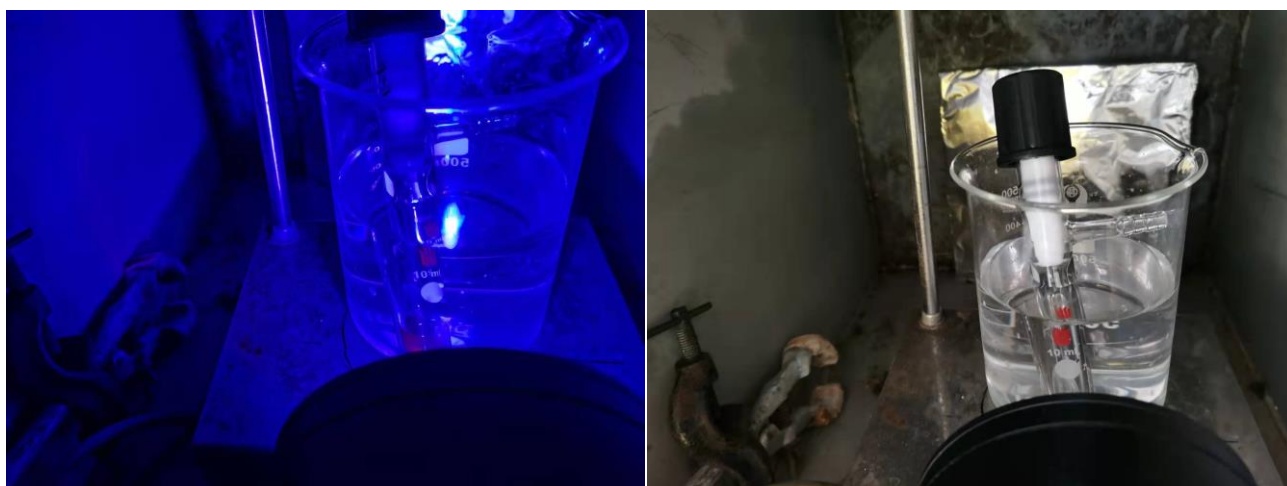

#### 4. General Procedure for the Synthesis of Substrates

##### General procedure for the synthesis of compounds **1a-1m** and **1t-1y**

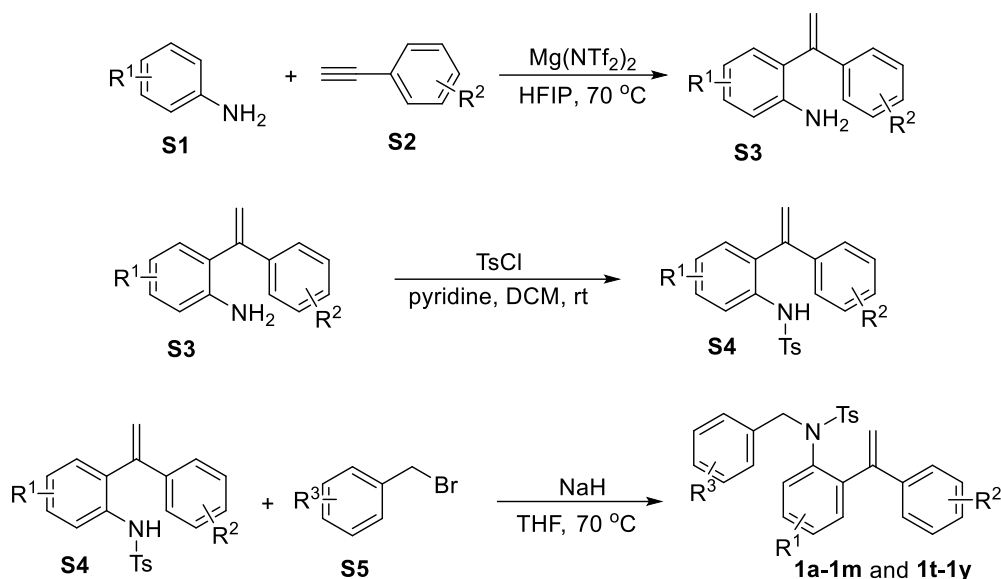

The procedure of preparing substrates **S3** was slightly modified according to the previous literature.<sup>1</sup>

To a stirred solution of **S1** (10.0 mmol, 1.0 equiv) and **S2** (12.0 mmol, 1.2 equiv) in HFIP (20.0 mL) was added Mg(NTf<sub>2</sub>)<sub>2</sub> (5.0 mol%). The resulted mixture was stirred at 70 °C for 24.0 h. After the filtration and the removal of solvent under reduced pressure, the residue was purified by a column chromatography on silica gel (petroleum ether / ethyl acetate = 10 / 1) to afford the corresponding compounds **S3**.

To a solution of **S3** (1.0 equiv) in 20.0 mL of freshly distilled anhydrous DCM was added TsCl (1.2 equiv) and pyridine (1.2 equiv) at room temperature and the reaction mixture was stirred for 12.0 h. After the reaction completion monitored by TLC analysis, the residue was purified by a silica gel flash chromatography (eluent: petroleum ether / EtOAc = 10 / 1) to afford compounds **S4**.

To a solution of **S4** (1.0 equiv) in 20.0 mL of freshly distilled anhydrous THF was added NaH (1.2 equiv) at room temperature and the resulting mixture was stirred for 1.0 h and then was warmed up to 70 °C. The resulted mixture was added with **S5** benzyl bromide (1.5 equiv) and stirred for 12.0 h. After the reaction completion monitored by TLC analysis, the residue was purified by a silica gel flash chromatography (eluent: petroleum ether / EtOAc = 10 / 1) to afford compounds **1a-1m** and **1t-1y** in good yields ranging from 69% to 93%.

## General procedure for the synthesis of compounds 1n-1r

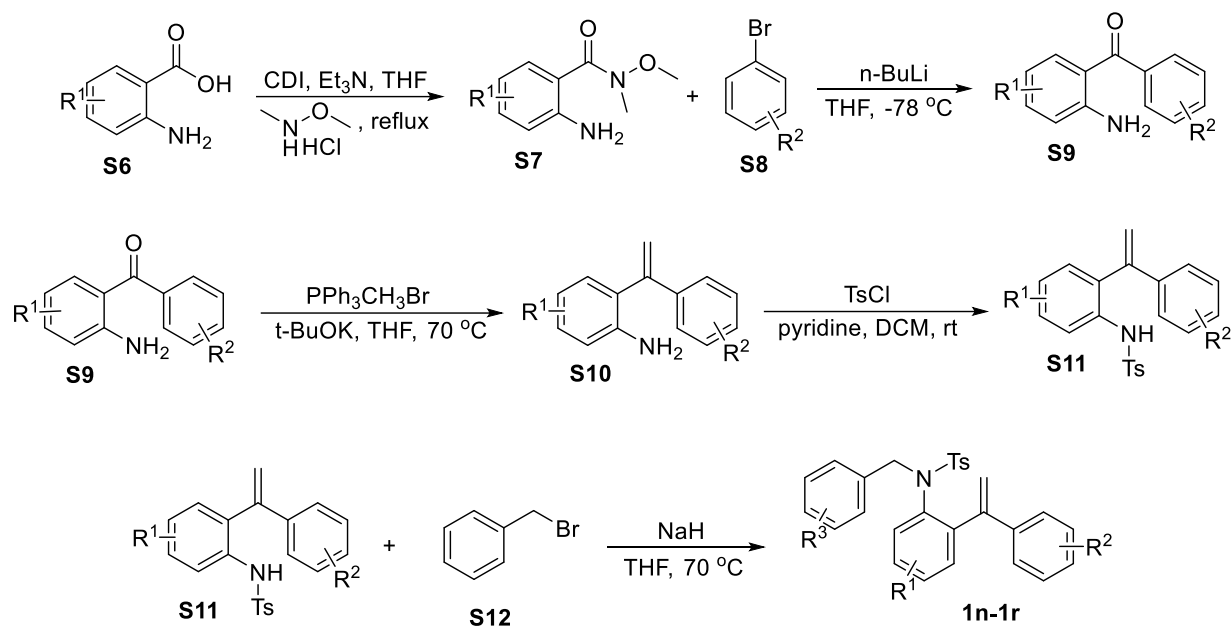

Compounds **S9** was prepared according to the previous literature.<sup>2</sup>

To a solution of **S6** (20.0 mmol, 1.0 equiv) and CDI (20.0 mmol, 1.0 equiv) in THF (extra dry, 20.0 mL) was stirred at room temperature for 2.0 h, and then a solution of  $N,O$ -dimethylhydroxylamine hydrochloride (20.0 mmol, 1.0 equiv) and  $NEt_3$  (30.0 mmol, 1.5 equiv) in THF (extra dry, 20.0 mL) was added. The reaction mixture was stirred at  $70\text{ }^\circ\text{C}$  for another 22.0 h. After completion of the reaction, the mixture was poured onto an equal volume of ice and saturated  $Na_2CO_3$  (50.0 mL). Next, the mixture was extracted with EA (3 x 30.0 mL), and the combined extracts were washed with water and brine, dried over anhydrous  $Na_2SO_4$ . After the solution was filtered and the solvent was evaporated under vacuum, the residue was purified by a flash column chromatograph on silica gel (eluent: petroleum ether / EtOAc = 1 / 1) to yield the products **S7**.

$n-BuLi$  (2.0 equiv) was added slowly to a mixture of **S7** (1.0 equiv) and ArBr **S8** (1.0 equiv) in 20.0 mL extra dry THF over 1.0 h in a flamed-dried flask at  $-78\text{ }^\circ\text{C}$  under the protection of Ar atmosphere upon stirring, and then 1.0 N HCl (32.0 mL, 2.0 equiv) was added carefully at  $-78\text{ }^\circ\text{C}$ , then the mixture was extracted with EA (3 x 20.0 mL), and the combined extracts were washed with saturated  $Na_2CO_3$ , dried over anhydrous  $Na_2SO_4$ . After the solution was filtered and the solvent was evaporated under vacuum, the residue was purified by a flash column chromatograph on silica gel (eluent: petroleum ether / EtOAc = 10 / 1) to yield the products **S9**.

A solution of  $\text{PPh}_3\text{CH}_3\text{Br}$  (1.2 equiv) and  $t\text{-BuOK}$  (1.2 equiv) in THF (10.0 mL) was stirred at 70 °C under argon atmosphere for 0.5 h. Afterwards, compounds **S9** (1.0 equiv) in THF (30.0 mL) was added and the reaction solution was stirred at 70 °C for another 12.0 h. Upon completion, the reaction was cooled to room temperature and the mixture was filtered through a celite. The filtrate was concentrated under reduced pressure and the residue was purified by a silica gel flash chromatography (eluent: petroleum ether / EtOAc = 20 / 1) to afford compounds **S10**.

To a solution of **S10** (1.0 equiv) in 20.0 mL of freshly distilled anhydrous DCM was added  $\text{TsCl}$  (1.2 equiv) and pyridine (1.2 equiv) at room temperature and the resulting mixture was stirred for 12.0 h. After the reaction completion monitored by TLC analysis, the solvent was removed under reduced pressure and the residue was purified by a silica gel flash chromatography (eluent: petroleum ether / EtOAc = 10 / 1) to afford compounds **S11**.

To a solution of **S11** (1.0 equiv) in 20.0 mL of freshly distilled anhydrous THF was added  $\text{NaH}$  (1.2 equiv) at room temperature and the resulting mixture was stirred for 1.0 h and then warmed up to 70 °C. The resulted mixture was added with **S12**  $\text{BnBr}$  (1.5 equiv) for 12.0 h. After the reaction completion monitored by TLC analysis, the solvent was removed under reduced pressure and the residue was purified by a silica gel flash chromatography (eluent: petroleum ether / EtOAc = 10 / 1) to afford compounds **1n-1r** in good yields ranging from 80% to 91%.

## General procedure for the synthesis of compounds **1s**, **1z-1ai** and **1ak**

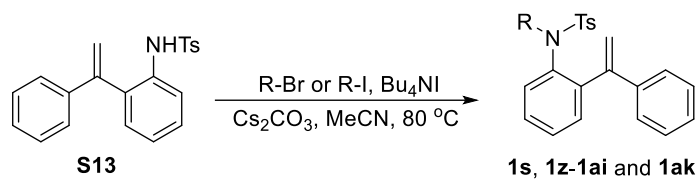

To a solution of **S13** (3.0 mmol, 1.0 equiv) in 20.0 mL of freshly distilled anhydrous MeCN was added R-Br or R-I (6.0 mmol, 2.0 equiv), Cs<sub>2</sub>CO<sub>3</sub> (6.0 mmol, 2.0 equiv) and Bu<sub>4</sub>NI (0.3 mmol, 0.1 equiv) and the resulting mixture was stirred at 80 °C for 12.0 h. After the reaction completion monitored by TLC analysis, the solvent was removed under reduced pressure and the residue was purified by a silica gel flash chromatography (eluent: petroleum ether / EtOAc = 10 / 1) to afford compounds **1s**, **1z-1ai** and **1ak** in good yields ranging from 71% to 94%.

## General procedure for the synthesis of compounds **1aj** and **1al**

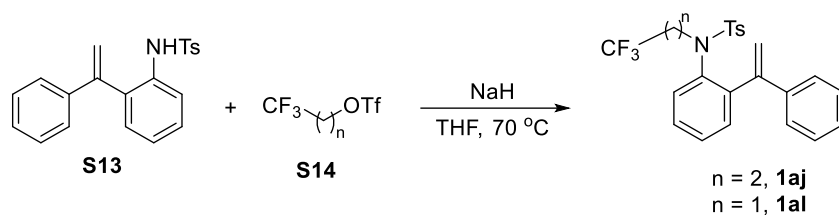

To a solution of **S13** (3.0 mmol, 1.0 equiv) in 20.0 mL of freshly distilled anhydrous THF was added NaH (3.6 mmol, 1.2 equiv) at room temperature for 1.0 h and the resulting mixture was warmed up to 70 °C. The resulted mixture was added with **S14** (4.5 mmol, 1.5 equiv) for 12.0 h. After the reaction completion monitored by TLC analysis, the solvent was removed under reduced pressure and the residue was purified by a silica gel flash chromatography (eluent: petroleum ether / EtOAc = 10 / 1) to afford compounds **1aj** and **1al** in 77% and 84% yields, respectively.

## General procedure for the synthesis of compound **1am**

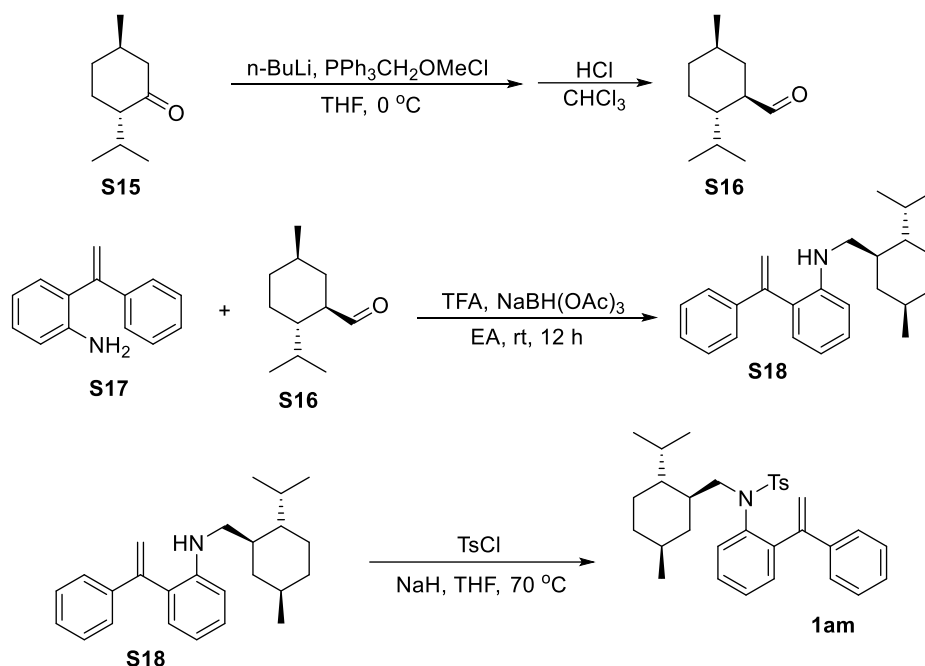

The procedure of preparing substrate **S18** was slightly modified according to the previous literature.<sup>6,7</sup>

A solution of  $\text{PPh}_3\text{CH}_2\text{OMeCl}$  (12.0 mmol, 1.2 equiv) in THF (20.0 mL) was added  $n\text{-BuLi}$  (12.0 mmol, 1.2 equiv) dropwise at  $0\text{ }^\circ\text{C}$  under argon atmosphere for 0.5 h and the resulting mixture was stirred for another 1.0 h. Afterwards compound **S15** (10.0 mmol, 1.0 equiv) in THF (10.0 mL) was added and the reaction solution was stirred at room temperature for overnight. The reaction mixture was neutralized by adding ice cold 1.0 N hydrochloric acid (35.0 mL) at  $0\text{ }^\circ\text{C}$  and the aqueous phase was extracted with ether (3 x 15.0 mL). The combined organic extracts were washed with water, brine, dried over  $\text{MgSO}_4$  and concentrated to approximately 10.0 mL. A white solid (triphenylphosphine oxide) precipitated, and these solids were filtered and washed with hexanes. The filtrate was concentrated in vacuo, and the residue was re-dissolved in chloroform (20.0 mL) and  $\text{HCl}$  (12.0 N, 3.0 mL) was added dropwise at  $0\text{ }^\circ\text{C}$ . The resulting mixture was stirred at room temperature for 4.0 h (monitored by TLC). The chloroform was evaporated from the mixture, and the residue was diluted with water (15.0 mL) and extracted with diethyl ether (3 x 15.0 mL). The combined organic extracts were washed with brine (20.0 mL), dried over  $\text{MgSO}_4$ , filtered and concentrated under reduced pressure. The crude compound was purified by a silica gel flash

column chromatography (eluent: petroleum ether / EtOAc = 40 / 1) to afford compound **S16** in 74% yield.

The 2-aminostyrene **S17** (1.0 equiv) was dissolved in ethyl acetate (0.25 M). The aldehyde **S16** (1.5 equiv) was added and followed by adding trifluoroacetic acid (2.0 equiv). The resulting mixture was stirred for 0.5 h and then sodium triacetoxyborohydride (2.0 equiv) was added. The mixture was stirred for 2.0 h and then the reduction was quenched with 4.0 M NaOH aqueous solution. The reaction mixture was diluted with ethyl acetate and washed twice with brine. The organic layer was dried over anhydrous magnesium sulfate, filtered, and concentrated under reduced pressure. The residue was purified by a flash column chromatography (eluent: petroleum ether / EtOAc = 10 / 1) to afford compound **S18** in 55% yield.

To a solution of **S18** (1.0 equiv) in 20.0 mL of freshly distilled anhydrous THF was added NaH (1.2 equiv) at room temperature for 1.0 h upon stirring and then was warmed up to 70 °C. The resulted mixture was added with TsCl and the resulting mixture was stirred for 12.0 h. After the reaction completion monitored by TLC analysis, the solvent was removed under reduced pressure and the residue was purified by a silica gel flash chromatography (eluent: petroleum ether / EtOAc = 10 / 1) to afford compound **1am** in 70% yield.

## General procedure for the synthesis of compound **1an**

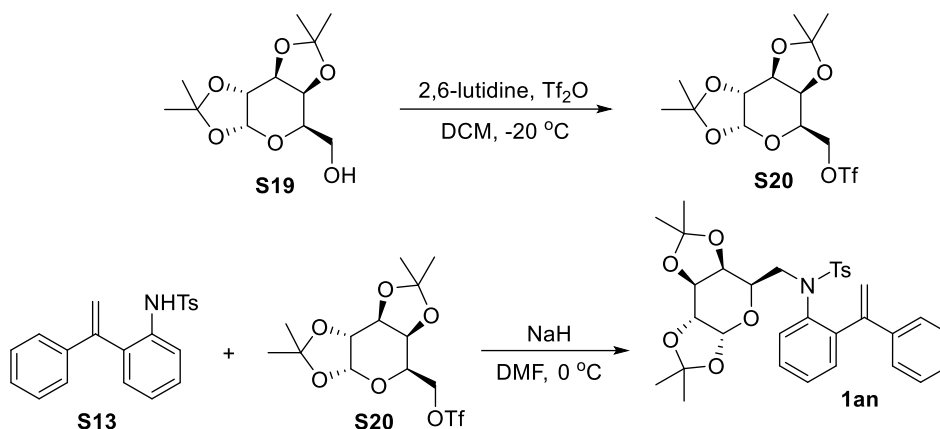

The procedure of preparing substrate **S20** was slightly modified according to the previous literature.<sup>8</sup>

Under argon atmosphere, to a solution of 2,6-lutidine (15.0 mmol, 1.5 equiv) in dry dichloromethane (35.0 mL) was added trifluoromethanesulfonic anhydride (15.0 mmol, 1.5 equiv) at  $-20\text{ }^\circ\text{C}$ . After 5.0 min, a solution of 1,2:3,4-di-O-isopropylidene- $\alpha$ -D-galactopyranose **S19** (10.0 mmol, 1.0 equiv) in dichloromethane (40.0 mL) was added dropwise to the solution at  $-20\text{ }^\circ\text{C}$ . The resulting solution was stirred at  $-20\text{ }^\circ\text{C}$  for 5.0 min, and then at  $0\text{ }^\circ\text{C}$  for another 30.0 min. The mixture was poured into ice-cooled water and extracted with dichloromethane. The solvent was removed under reduced pressure and the residue was purified on a silica gel column chromatography (eluent: petroleum ether / EtOAc = 10 / 1) to give compound **S20** as a colorless oil in 94% yield.

To a solution of **S13** (1.0 equiv) in 20.0 mL of anhydrous DMF was added NaH (1.2 equiv) at  $0\text{ }^\circ\text{C}$  for 1.0 h. Afterwards compound **S20** (1.0 equiv) in DMF (10.0 mL) was added dropwise at  $0\text{ }^\circ\text{C}$  for 1.0 h. The resulted mixture was stirred for overnight at  $0\text{ }^\circ\text{C}$ . After the reaction completion monitored by TLC analysis, the mixture was filtered and washed with DCM. The filtrate was concentrated in vacuo and extracted with DCM (3 x 15.0 mL). After above operation, the residue was purified by a silica gel flash chromatography (eluent: petroleum ether / EtOAc = 5 / 1) to afford compound **1an** in 51% yield.

## General procedure for the synthesis of compound **1ao**

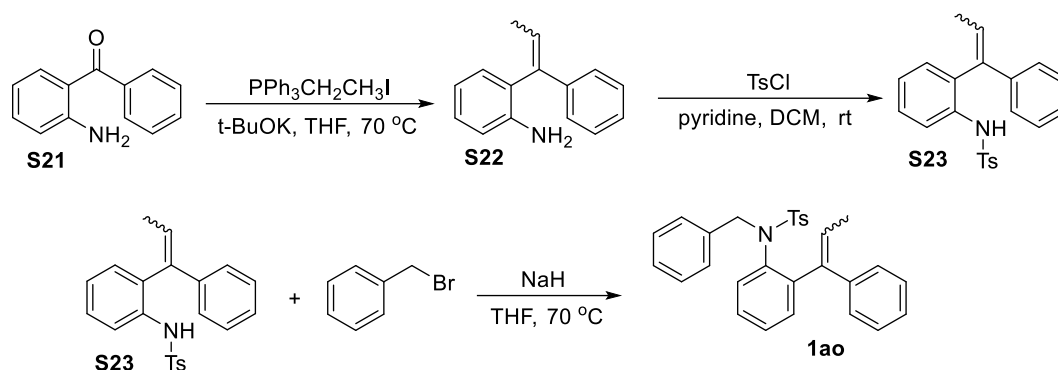

A solution of  $\text{PPh}_3\text{CH}_2\text{CH}_3\text{I}$  (10.0 mmol, 1.0 equiv) and  $t\text{-BuOK}$  (12.0 mmol, 1.2 equiv) in THF (10.0 mL) was stirred at  $70^\circ\text{C}$  under argon atmosphere for 0.5 h. Afterwards compound **S21** (10.0 mmol, 1.0 equiv) in THF (10.0 mL) was added and the reaction solution was stirred at  $70^\circ\text{C}$  for another 1.0 h. Upon completion, the reaction was cooled to room temperature and the mixture was filtered through a celite. The filtrate was concentrated under reduced pressure and the residue was purified by a silica gel flash chromatography (eluent: petroleum ether / EtOAc = 10 / 1) to afford compound **S22** in 65% yield.

To a solution of **S22** (1.0 equiv) in 20.0 mL of freshly distilled anhydrous DCM was added  $\text{TsCl}$  (1.2 equiv) and pyridine (1.2 equiv) at room temperature and the resulting mixture was stirred for 12.0 h. After the reaction completion monitored by TLC analysis, the solvent was removed under reduced pressure and the residue was purified by a silica gel flash chromatography (eluent: petroleum ether / EtOAc = 10 / 1) to afford compound **S23** in 93% yield.

To a solution of **S23** (1.0 equiv) in 20.0 mL of freshly distilled anhydrous THF was added  $\text{NaH}$  (1.2 equiv) at room temperature for 1.0 h and the mixture was warmed up to  $70^\circ\text{C}$ . The resulted mixture was added with  $\text{BnBr}$  (1.5 equiv) and was stirred for 12.0 h. After the reaction completion monitored by TLC analysis, the solvent was removed under reduced pressure and the residue was purified by a silica gel flash chromatography (eluent: petroleum ether / EtOAc = 10 / 1) to afford compound **1ao** in 81% yield.

## General procedure for the synthesis of compound 1ap

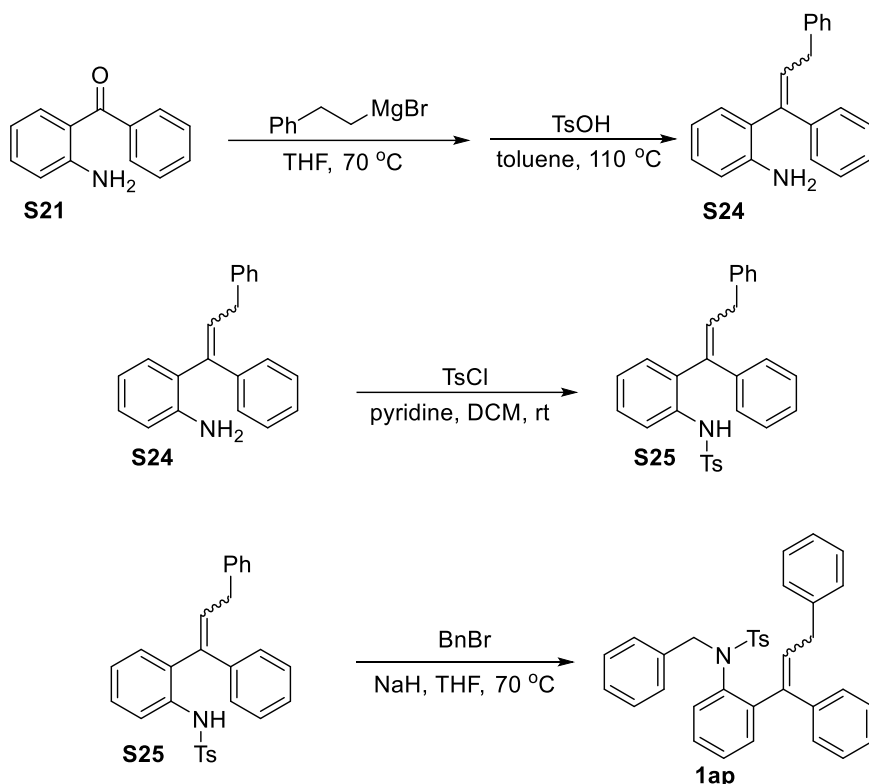

Compound **S24** was prepared according to the previous literature.<sup>3</sup>

To a solution of **S21** (10.0 mmol, 1.0 equiv) in 30.0 mL of freshly distilled anhydrous THF was added dropwise  $\text{Ph(CH}_2)_2\text{MgBr}$  (30.0 mmol, 3.0 equiv) at room temperature over 1.0 h. The mixture was stirred at 70 °C for 24.0 h. After the reaction completion monitored by TLC analysis, the residue was added with 1.0 N HCl (30.0 mL), and then the resulting mixture was stirred for 1.0 h and then was extracted with EA (3 x 20.0 mL), and the combined extracts were washed with saturated  $\text{Na}_2\text{CO}_3$ , dried over anhydrous  $\text{Na}_2\text{SO}_4$ . A reaction mixture of the above crude tertiary alcohol and *p*-TsOH (2.0 mmol, 0.2 equiv) in toluene (30.0 mL) was refluxed for 24.0 h. After cooling to room temperature, it was washed with  $\text{H}_2\text{O}$  (3 x 15.0 mL) and brine (2 x 15.0 mL) in sequence, and then extracted with EtOAc (3 x 15.0 mL). The combined organic layer was dried over anhydrous  $\text{Na}_2\text{SO}_4$ , concentrated, and purified by a silica gel flash chromatography (eluent: petroleum ether / EtOAc = 10 / 1) to afford compound **S24** in 52% yield.

To a solution of **S24** (1.0 equiv) in 20.0 mL of freshly distilled anhydrous DCM was added TsCl (1.2 equiv) and pyridine (1.2 equiv) at room temperature for 12.0 h upon stirring. After the reaction completion monitored by TLC analysis, the solvent was removed under reduced pressure

and the residue was purified by a silica gel flash chromatography (eluent: petroleum ether / EtOAc = 10 / 1) to afford compound **S25** in 85% yield.

To a solution of **S25** (1.0 equiv) in 20.0 mL of freshly distilled anhydrous THF was added NaH (1.2 equiv) at room temperature and was stirred for 1.0 h and then was warmed up to 70 °C. The resulted mixture was added with BnBr (1.5 equiv) and was stirred for 12.0 h. After the reaction completion monitored by TLC analysis, the solvent was removed under reduced pressure and the residue was purified by a silica gel flash chromatography (eluent: petroleum ether / EtOAc = 10 / 1) to afford compound **1ap** in 79% yield.

## General procedure for the synthesis of compounds **1aw-1aag**

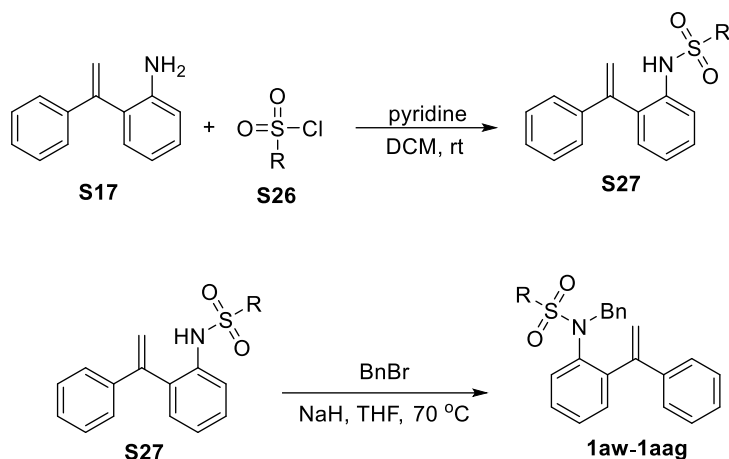

To a solution of **S17** (10.0 mmol, 1.0 equiv) in 20.0 mL of freshly distilled anhydrous DCM was added **S26** (12.0 mmol, 1.2 equiv) and pyridine (12.0 mmol, 1.2 equiv) at room temperature and the resulting mixture was stirred for 12.0 h. After the reaction completion monitored by TLC analysis, the solvent was removed under reduced pressure and the residue was purified by a silica gel flash chromatography (eluent: petroleum ether / EtOAc = 10 / 1) to afford compounds **S27**.

To a solution of **S27** (1.0 equiv) in 20.0 mL of freshly distilled anhydrous THF was added NaH (1.2 equiv) at room temperature for 1.0 h and the mixture was warmed up to 70 °C. The resulted mixture was added with BnBr (1.5 equiv) and was stirred for 12.0 h. After the reaction completion monitored by TLC analysis, the solvent was removed under reduced pressure and the residue was purified by a silica gel flash chromatography (eluent: petroleum ether / EtOAc = 10 / 1) to afford compounds **1aw-1aag** in good yields ranging from 60% to 90%.

## General procedure for the synthesis of compounds **1aah-1aak**

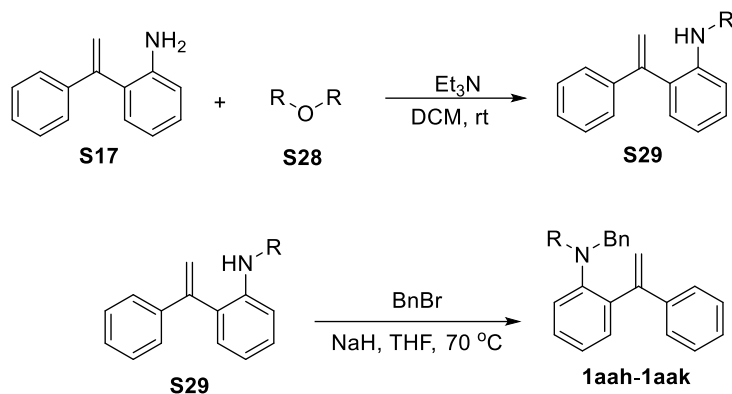

To a solution of **S17** (5.0 mmol, 1.0 equiv) and  $\text{Et}_3\text{N}$  (7.5 mmol, 1.5 equiv) in 20.0 mL of freshly distilled anhydrous DCM was added **S28** (7.5 mmol, 1.5 equiv) dropwise at room temperature for 20.0 min. The mixture was stirred for another 12.0 h. After the reaction completion monitored by TLC analysis, the solvent was removed under reduced pressure and the residue was purified by a silica gel flash chromatography (eluent: petroleum ether / EtOAc = 10 / 1) to afford compounds **S29**.

To a solution of **S29** (1.0 equiv) in 20.0 mL of freshly distilled anhydrous THF was added  $\text{NaH}$  (1.2 equiv) at room temperature for 1.0 h and the mixture was warmed up to  $70\text{ }^\circ\text{C}$ . The resulted mixture was added with  $\text{BnBr}$  (1.5 equiv) and was stirred for 12.0 h. After the reaction completion monitored by TLC analysis, the solvent was removed under reduced pressure and the residue was purified by a silica gel flash chromatography (eluent: petroleum ether / EtOAc = 10 / 1) to afford compounds **1aah-1aak** in good yields ranging from 67% to 90%.

## General procedure for the synthesis of compounds **1aq** and **1as**

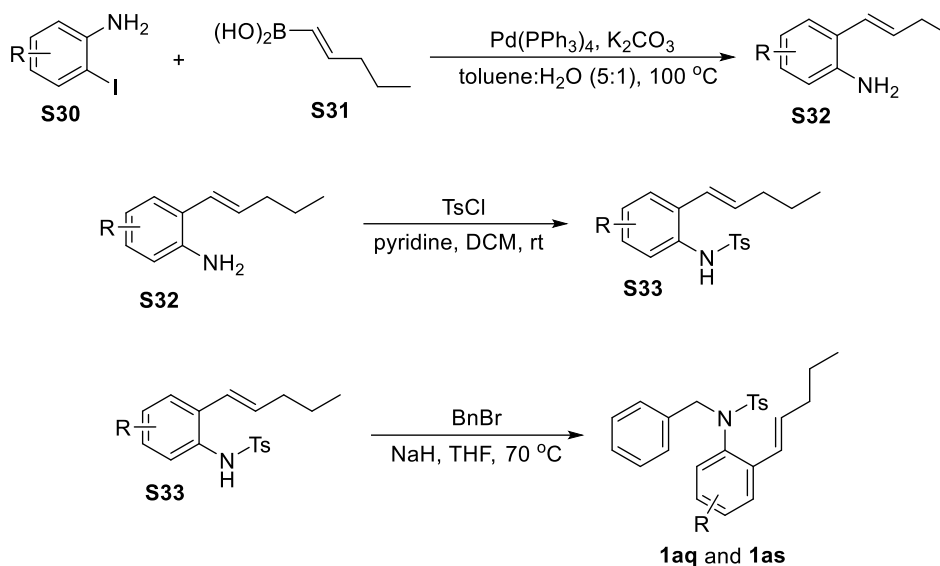

The procedure of preparing substrates **S32** was slightly modified according to the previous literature.<sup>5</sup>

Compounds **S30** (10.0 mmol, 1.0 equiv), **S31** (15.0 mmol, 1.5 equiv),  $\text{Pd(PPh}_3)_4$  (10.0 mol%) and  $\text{K}_2\text{CO}_3$  (30.0 mmol, 3.0 equiv) were mixed with toluene (50.0 mL) and  $\text{H}_2\text{O}$  (10.0 mL). The resulting reaction mixture was stirred for 24.0 h at  $100\text{ }^\circ\text{C}$ . After completion of the reaction, the solution was concentrated in vacuo and the residue was purified by a column chromatography on silica gel (eluent: petroleum ether /  $\text{EtOAc}$  = 8 / 1) to give the desired products **S32**.

To a solution of **S32** (1.0 equiv) in 20.0 mL of freshly distilled anhydrous  $\text{DCM}$  was added  $\text{TsCl}$  (1.2 equiv) and pyridine (1.2 equiv) at room temperature and the mixture was stirred for 12.0 h. After the reaction completion monitored by TLC analysis, the solvent was removed under reduced pressure and the residue was purified by a silica gel flash chromatography (eluent: petroleum ether /  $\text{EtOAc}$  = 10 / 1) to afford compounds **S33**.

To a solution of **S33** (1.0 equiv) in 20.0 mL of freshly distilled anhydrous  $\text{THF}$  was added  $\text{NaH}$  (1.2 equiv) at room temperature and the resulting mixture was stirred for 1.0 h and then was warmed up to  $70\text{ }^\circ\text{C}$ . The resulted mixture was added with  $\text{BnBr}$  (1.5 equiv) and was stirred for 12.0 h. After the reaction completion monitored by TLC analysis, the solvent was removed under reduced pressure and the residue was purified by a silica gel flash chromatography (eluent: petroleum ether /  $\text{EtOAc}$  = 5 / 1) to afford compounds **1aq** and **1as** in 92% and 90% yields, respectively.

## General procedure for the synthesis of compound **1ar**

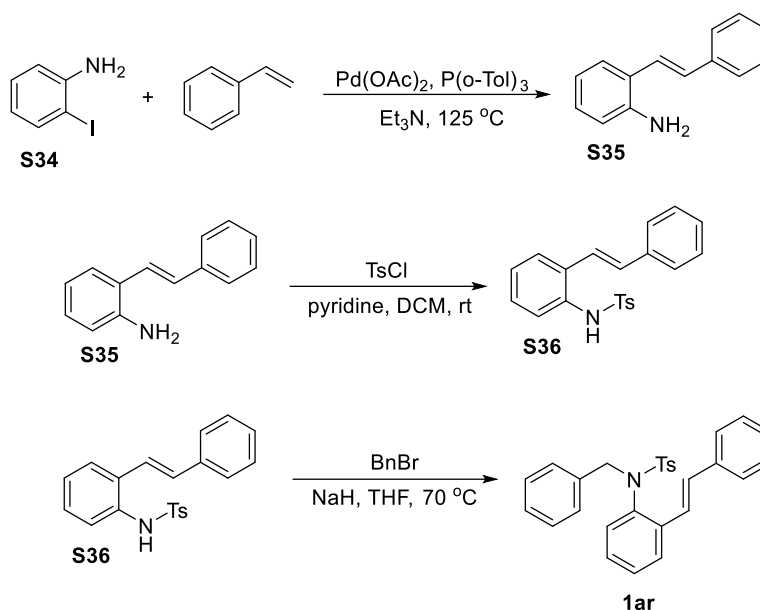

The procedure of preparing substrate **S35** was slightly modified according to the previous literature.<sup>9</sup>

The reaction mixture of compound **S34** (10.0 mmol, 1.0 equiv), styrene (15.0 mmol, 1.5 equiv),  $\text{Pd}(\text{OAc})_2$  (10.0 mol%),  $\text{P}(o\text{-Tol})_3$  (20.0 mol%) and  $\text{Et}_3\text{N}$  (50.0 mL) was stirred for 24.0 h at  $125^\circ\text{C}$ . After completion of the reaction, the solution was concentrated in vacuo and the residue was purified by a column chromatography on silica gel (eluent: petroleum ether /  $\text{EtOAc}$  = 8 / 1) to give the desired product **S35** in 66% yield.

To a solution of **S35** (1.0 equiv) in 20.0 mL of freshly distilled anhydrous  $\text{DCM}$  was added  $\text{TsCl}$  (1.2 equiv) and pyridine (1.2 equiv) at room temperature and the resulting mixture was stirred for 12.0 h. After the reaction completion monitored by TLC analysis, the solvent was removed under reduced pressure and the residue was purified by a silica gel flash chromatography (eluent: petroleum ether /  $\text{EtOAc}$  = 10 / 1) to afford compound **S36** in 87% yield.

To a solution of **S36** (1.0 equiv) in 20.0 mL of freshly distilled anhydrous  $\text{THF}$  was added  $\text{NaH}$  (1.2 equiv) at room temperature for 1.0 h and the mixture was warmed up to  $70^\circ\text{C}$ . The resulted mixture was added with  $\text{BnBr}$  (1.5 equiv) and was stirred for 12.0 h. After the reaction completion monitored by TLC analysis, the solvent was removed under reduced pressure and the residue was purified by a silica gel flash chromatography (eluent: petroleum ether /  $\text{EtOAc}$  = 5 / 1) to afford compound **1ar** in 81% yield.

## General procedure for the synthesis of compounds **1at** and **1au**

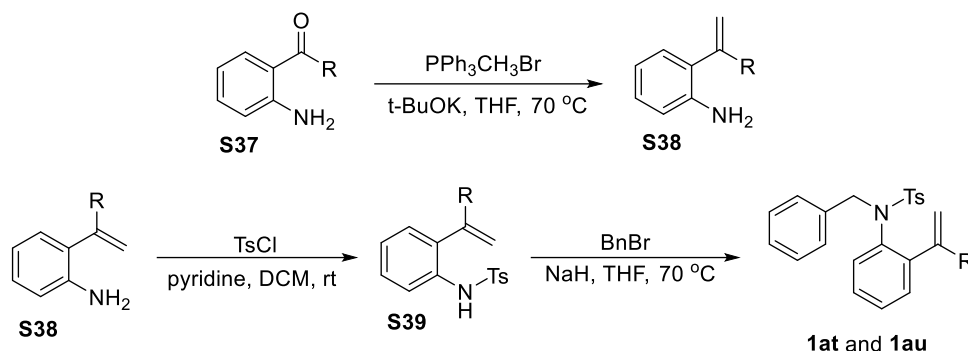

A solution of  $\text{PPh}_3\text{CH}_3\text{Br}$  (12.0 mmol, 1.2 equiv) and  $t\text{-BuOK}$  (12.0 mmol, 1.2 equiv) in THF (10.0 mL) was stirred at  $70\text{ }^\circ\text{C}$  under argon atmosphere for 0.5 h. Afterwards compounds **S37** (10.0 mmol, 1.0 equiv) in THF (10.0 mL) was added and the reaction solution was stirred at  $70\text{ }^\circ\text{C}$  for another 1.0 h. Upon completion, the reaction was cooled to room temperature and the mixture was filtered through a celite. The filtrate was concentrated under reduced pressure and the residue was purified by a silica gel flash chromatography (eluent: petroleum ether / EtOAc = 10 / 1) to afford compounds **S38**.

To a solution of **S38** (1.0 equiv) in 20.0 mL of freshly distilled anhydrous DCM was added  $\text{TsCl}$  (1.2 equiv) and pyridine (1.2 equiv) at room temperature and the resulting mixture was stirred for 12.0 h. After the reaction completion monitored by TLC analysis, the solvent was removed under reduced pressure and the residue was purified by a silica gel flash chromatography (eluent: petroleum ether / EtOAc = 5 / 1) to afford compounds **S39**.

To a solution of **S39** (1.0 equiv) in 20.0 mL of freshly distilled anhydrous THF was added  $\text{NaH}$  (1.2 equiv) at room temperature for 1.0 h and the mixture was warmed up to  $70\text{ }^\circ\text{C}$ . The resulted mixture was added with  $\text{BnBr}$  (1.5 equiv) and was stirred for 12.0 h. After the reaction completion monitored by TLC analysis, the solvent was removed under reduced pressure and the residue was purified by a silica gel flash chromatography (eluent: petroleum ether / EtOAc = 10 / 1) to afford compounds **1at** and **1au** in 77% and 90% yields, respectively.

## General procedure for the synthesis of compound 1av

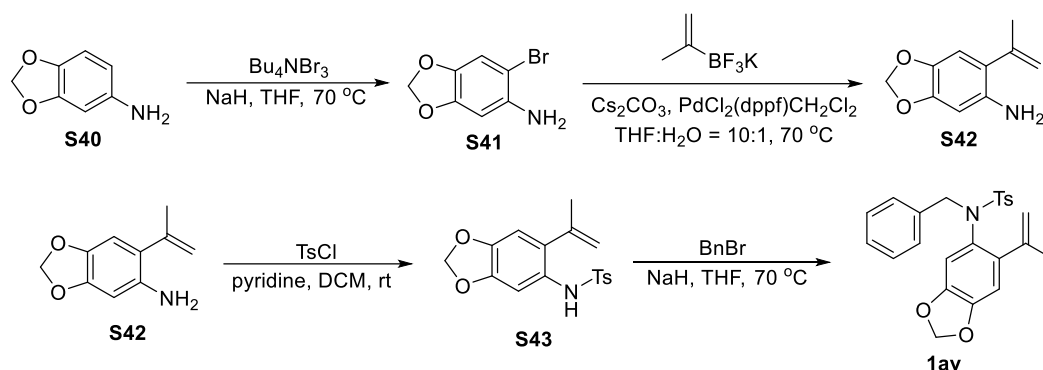

The procedure of preparing substrate **S42** was slightly modified according to the previous literature.<sup>4</sup>

Compound **S40** (10.0 mmol, 1.0 equiv),  $\text{Bu}_4\text{NBr}_3$  (30.0 mmol, 3.0 equiv) and  $\text{NaH}$  (30.0 mmol, 3.0 equiv) were added in THF (40.0 mL). The reaction mixture was stirred for 24.0 h at  $70^\circ\text{C}$ . After completion of the reaction, the solution was concentrated in vacuo and purified by a column chromatography on silica gel (eluent: petroleum ether / DCM / EtOAc = 30 / 1 / 1) to give the desired product **S41** in 50% yield.

Compound **S41** (1.0 equiv), potassium isopropenyltrifluoroborate (1.1 equiv), and  $\text{PdCl}_2(\text{dppf})\text{CH}_2\text{Cl}_2$  (10.0 mol%),  $\text{Cs}_2\text{CO}_3$  (3.0 equiv) were mixed with THF (20.0 mL) and  $\text{H}_2\text{O}$  (2.0 mL) solvent. The reaction mixture was stirred for 24.0 h at  $70^\circ\text{C}$ . After completion of the reaction, the organic phase was extracted with EtOAc ( $3 \times 15.0$  mL) and then the solution was concentrated in vacuo and purified by a column chromatography on silica gel (eluent: petroleum ether / EtOAc = 8 / 1) to give the desired product **S42** in 71% yield.

To a solution of **S42** (1.0 equiv) in 20.0 mL of freshly distilled anhydrous DCM was added  $\text{TsCl}$  (1.2 equiv) and pyridine (1.2 equiv) at room temperature and the resulting mixture was stirred for 12.0 h. After the reaction completion monitored by TLC analysis, the solvent was removed under reduced pressure and the residue was purified by a silica gel flash chromatography (eluent: petroleum ether / EtOAc = 5 / 1) to afford compound **S43** in 90% yield.

To a solution of **S43** (1.0 equiv) in 20.0 mL of freshly distilled anhydrous THF was added  $\text{NaH}$  (1.2 equiv) at room temperature for 1.0 h and then was warmed up to  $70^\circ\text{C}$ . The resulted mixture was added with  $\text{BnBr}$  (1.5 equiv) and was stirred for 12.0 h. After the reaction completion

monitored by TLC analysis, the solvent was removed under reduced pressure and the residue was purified by a silica gel flash chromatography (eluent: petroleum ether / EtOAc = 5 / 1) to afford compound **1av** in 80% yield.

## General procedure for the synthesis of compound [D<sub>2</sub>]-1a

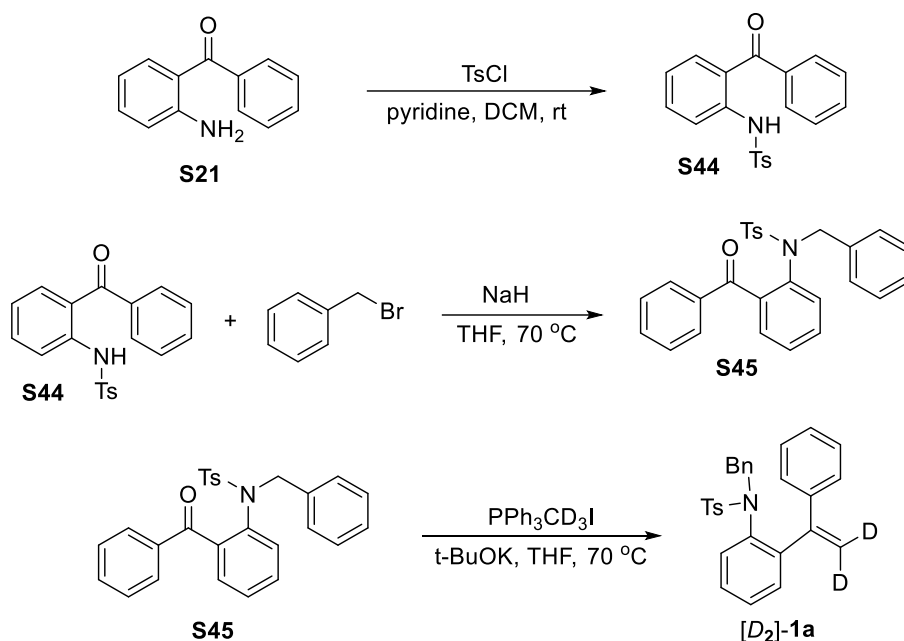

To a solution of **S21** (10.0 mmol, 1.0 equiv) in 20.0 mL of freshly distilled anhydrous DCM was added TsCl (12.0 mmol, 1.2 equiv) and pyridine (12.0 mmol, 1.2 equiv) at room temperature and the resulting mixture was stirred for 12.0 h. After the reaction completion monitored by TLC analysis, the solvent was removed under reduced pressure and the residue was purified by a silica gel flash chromatography (eluent: petroleum ether / EtOAc = 8 / 1) to afford compound **S44** in 75% yield.

To a solution of **S44** (1.0 equiv) in 20.0 mL of freshly distilled anhydrous THF was added NaH (1.2 equiv) at room temperature and the resulting mixture was stirred for 1.0 h and then was warmed up to 70 °C. The resulted mixture was added with BnBr (1.5 equiv) and was stirred for 12.0 h. After the reaction completion monitored by TLC analysis, the solvent was removed under reduced pressure and the residue was purified by a silica gel flash chromatography (eluent: petroleum ether / EtOAc = 8 / 1) to afford compound **S45** in 92% yield.

A solution of PPh<sub>3</sub>CD<sub>3</sub>I (1.2 equiv) and t-BuOK (1.2 equiv) in THF (20.0 mL) was stirred at 70 °C under argon atmosphere for 0.5 h. Afterwards, compound **S45** (1.0 equiv) in THF (20.0 mL) was added and the reaction solution was stirred at 70 °C for another 1.0 h. Upon completion, the reaction was cooled to room temperature and the mixture was filtered through a celite. The filtrate was concentrated under reduced pressure and the residue was purified by a silica gel flash

chromatography (eluent: petroleum ether / EtOAc = 10 / 1) to afford compound [*D*<sub>2</sub>]-**1a** in 75% yield and the D containing content was 93%.

## General procedure for the synthesis of compounds 1a-l

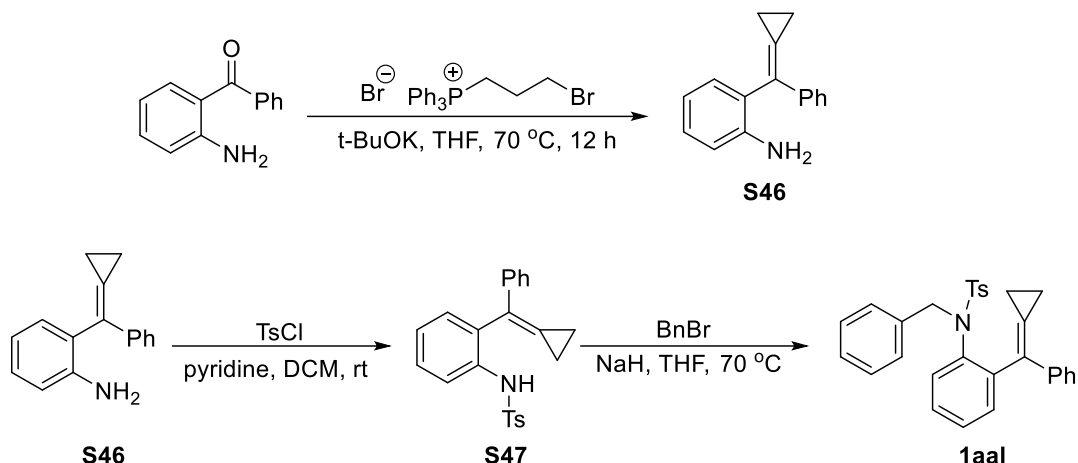

A solution of (3-bromopropyl)triphenylphosphonium bromide (12.0 mmol, 1.2 equiv) and *tert*-BuOK (12.0 mmol, 1.2 equiv) in THF (10.0 mL) was stirred at 70 °C under argon atmosphere for 0.5 h. Afterwards compound (2-aminophenyl)(phenyl)methanone (10.0 mmol, 1.0 equiv) in THF (10.0 mL) was added and the reaction solution was stirred at 70 °C for another 12.0 h. Upon completion, the reaction was cooled to room temperature and the mixture was filtered through a celite. The filtrate was concentrated under reduced pressure and the residue was purified by a silica gel flash chromatography (eluent: petroleum ether / EtOAc = 20 / 1) to afford compounds **S46** in 58% yield.

To a solution of **S46** (5.0 mmol, 1.0 equiv) in 20.0 mL of freshly distilled anhydrous DCM was added TsCl (6.0 mmol, 1.2 equiv) and pyridine (6.0 mmol, 1.2 equiv) at room temperature and the resulting mixture was stirred for 12.0 h. After the reaction completion monitored by TLC analysis, the solvent was removed under reduced pressure and the residue was purified by a silica gel flash chromatography (eluent: petroleum ether / EtOAc = 10 / 1) to afford compounds **S47** in 90% yield.

To a solution of **S47** (2.0 mmol, 1.0 equiv) in 20.0 mL of freshly distilled anhydrous THF was added NaH (2.4 mmol, 1.2 equiv) at room temperature for 1.0 h and the mixture was warmed up to 70 °C. The resulted mixture was added with BnBr (3.0 mmol, 1.5 equiv) and was stirred for 12.0 h. After the reaction completion monitored by TLC analysis, the solvent was removed under reduced pressure and the residue was purified by a silica gel flash chromatography (eluent: petroleum ether / EtOAc = 10 / 1) to afford compound **1a-l** in 88% yield with 818 mg.

## 5. General Procedure for the Synthesis of Products

### General procedure for the synthesis of compounds **2a-2ah**, **2aj-2ao**

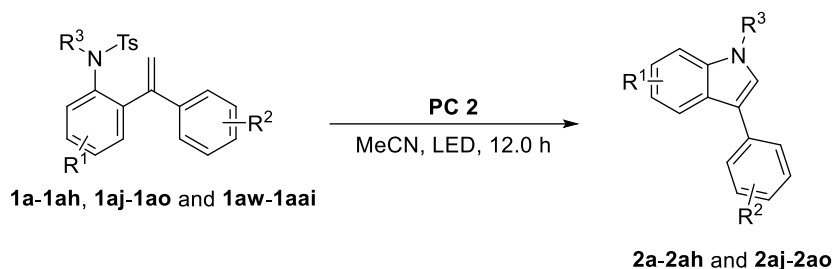

To a stirred solution of **1a-1ah**, **1aj-1ao** and **1aw-1aai** (0.1 mmol, 1.0 equiv) was added **PC 2** (2.0 mol%) in degassed MeCN (2.0 mL) under argon atmosphere and the mixture was irradiated with 385 nm LED or 100 W BLUE LED for 12.0-24.0 h. After the removal of solvent under reduced pressure, the residue was purified by a column chromatography on silica gel (petroleum ether / ethyl acetate = 20 / 1) to afford the corresponding compounds **2a-2ah** and **2aj-2ao** in the yields ranging from 37% to 98%.

**General procedure for the synthesis of compounds 2ai and 2ap and the scale-up reaction of 2a**

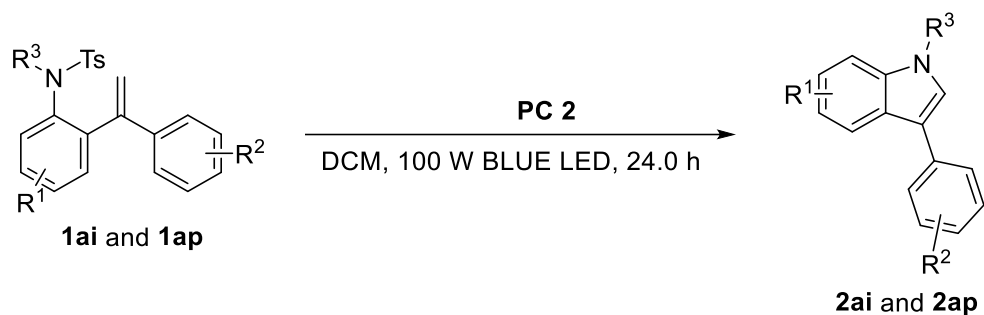

To a stirred solution of **1ai** and **1ap** (0.1 mmol, 1.0 equiv) was added **PC 2** (2.0 mol%) in degassed DCM (2.0 mL) under argon atmosphere and the mixture was irradiated with 100 W BLUE LED for 24.0 h. After the removal of solvent under reduced pressure, the residue was purified by a column chromatography on silica gel (petroleum ether / ethyl acetate = 20 / 1) to afford the corresponding compounds **2ai** and **2ap** in 32% and 21% yields, respectively.

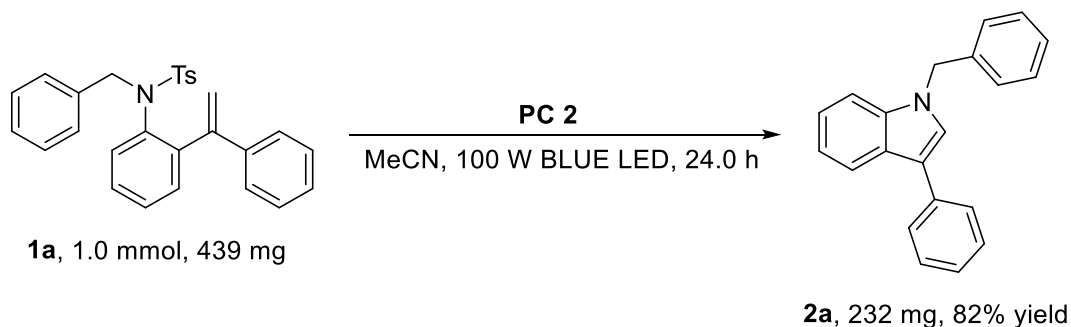

To a stirred solution of **1a** (439 mg, 1.0 mmol) was added **PC 2** (2.0 mol%) in degassed MeCN (20.0 mL) under argon atmosphere and the mixture was irradiated with 100 W BLUE LED for 24.0 h. After the removal of solvent under reduced pressure, the residue was purified by a column chromatography on silica gel (petroleum ether / ethyl acetate = 20 / 1) to afford the corresponding compound **2a** in 82% yield with 232 mg.

## General procedure for the synthesis of compound [D]-2a

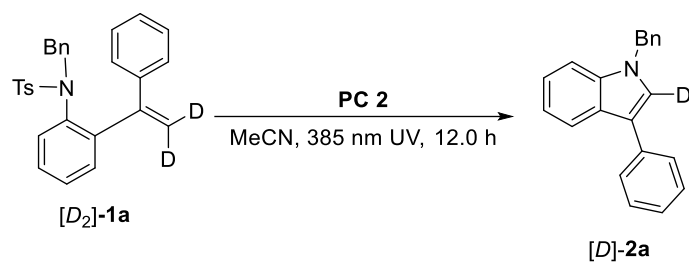

To a stirred solution of **[D<sub>2</sub>]-1a** (0.1 mmol, 1.0 equiv) was added **PC 2** (2.0 mol%) in degassed MeCN (2.0 mL) under argon atmosphere and the mixture was irradiated with 385 nm LED light for 12.0 h. After the removal of solvent under reduced pressure, the residue was purified by a column chromatography on silica gel (petroleum ether / ethyl acetate = 20 / 1) to afford the corresponding compound **[D]-2a** in 83% D containing 93%.

## General procedure for the synthesis of compound 11a

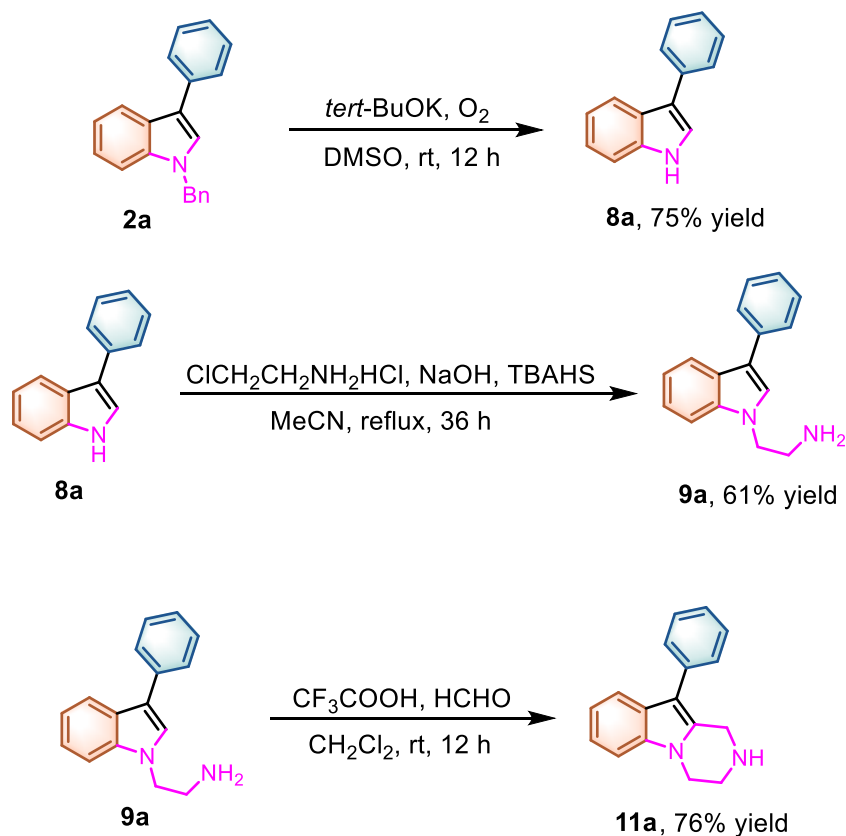

Compound **2a** (2.0 mmol) was dissolved in DMSO (4 mL). While the solution was stirred at room temperature, KOT-Bu (10 mL of a 1 M solution in THF, 10.0 mmol) was added. Oxygen was then bubbled into the resulting solution for 12 h. Upon completion (determined by TLC), the reaction was quenched with saturated aqueous NH<sub>4</sub>Cl (20 mL). The aqueous phase was extracted with EtOAc (3 × 10 mL), and the combined organic layers were dried over anhydrous Na<sub>2</sub>SO<sub>4</sub> and concentrated under reduced pressure. The remaining residue was purified by a flash column chromatography on silica gel (petroleum ether / ethyl acetate = 10 / 1) to afford **8a** (290 mg, 75% yield) as a yellow solid.

To a solution of the compound **8a** (1.0 mmol) in MeCN (3 mL) was added sodium hydroxide (200 mg, 5.0 mmol) and tetrabutylammonium hydrogen sulfate (17 mg, 0.05 mmol). After the solution was stirred at room temperature for 30 min, 2-chloroethylamine hydrochloride (139 mg, 1.2 mmol) was added. Then the reaction mixture was refluxed for 36 h. The resulting mixture was poured into water (10 mL), extracted with diethyl ether, dried over anhydrous MgSO<sub>4</sub>, and concentrated under reduced pressure to give a crude product. The crude was then purified by a flash column chromatography on silica gel (petroleum ether / acetone = 1 / 1) to give the product **9a** (144

mg, 61% yield) as a yellow oil.

A solution of the **9a** (0.2 mmol) in dichloromethane (2 mL) was treated with formaldehyde (37% aqueous solution, 328  $\mu$ L, 0.4 mmol). Trifluoroacetic acid (60  $\mu$ L, 0.8 mmol) was then added at room temperature, and the resulting reaction mixture was stirred for 12 h. Saturated aqueous sodium hydrogen carbonate was added, and the organic phase was separated. The aqueous phase was extracted with dichloromethane (DCM), the organic extracts were combined together, washed with saturated aqueous sodium chloride, and dried over anhydrous Na<sub>2</sub>SO<sub>4</sub>. Removal of the solvent under reduced pressure left a residue which was purified by a column chromatography on silica gel (petroleum ether / ethyl acetate = 2 / 1) to afford **11a** (38 mg, 76% yield) as a light yellow solid.

## 6. Mechanistic Investigations

### 6.1 Radical Trapping Experiment

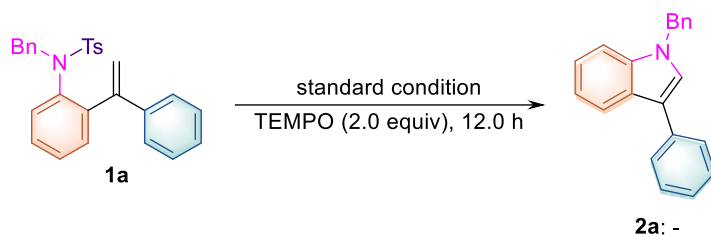

To a stirred solution of **1a** (0.1 mmol, 1.0 equiv) was added **PC 2** (2.0 mol%) and TEMPO (0.2 mmol, 2.0 equiv) in degassed MeCN (2.0 mL) under argon atmosphere and the mixture was irradiated with 385 nm LED for 12.0 h. When the reaction finished, the mixture was concentrated in *vacuo*. The yield of product **2a** was determined by  $^1\text{H}$  NMR spectroscopy using 1,3,5-trimethoxybenzene as an internal standard.

## 6.2 Quantum Yield

To further investigate whether the chain process is involved upon light irradiation, we measured the quantum yields of the reaction of **1a**, **1n** and **1o** to **2a**, **2n** and **2o**.

$$\phi = \frac{n_x}{n_p} = \frac{n_x}{\frac{\Delta E \times S \times t}{N_A h \nu}} = \frac{n_x \times N_A \times h \times c}{\Delta E \times S \times t \times \lambda}$$

$n_x$  is the amount of photochemical or photophysical events  $x$  occurred during irradiation,  $n_p$  is the number of photons absorbed by the reactant.  $E$  is the radiant power.  $S$  is the irradiated area.  $t$  is the irradiated time.  $N_A$  is the Avogadro constant.  $h$  is the Planck constant.  $\nu$  is the frequency of incident light.  $n_x$  was analyzed by  $^1\text{H}$  NMR,  $DE$  was measured by ILT1400 Portable Radiometer/Photometer.<sup>10</sup>

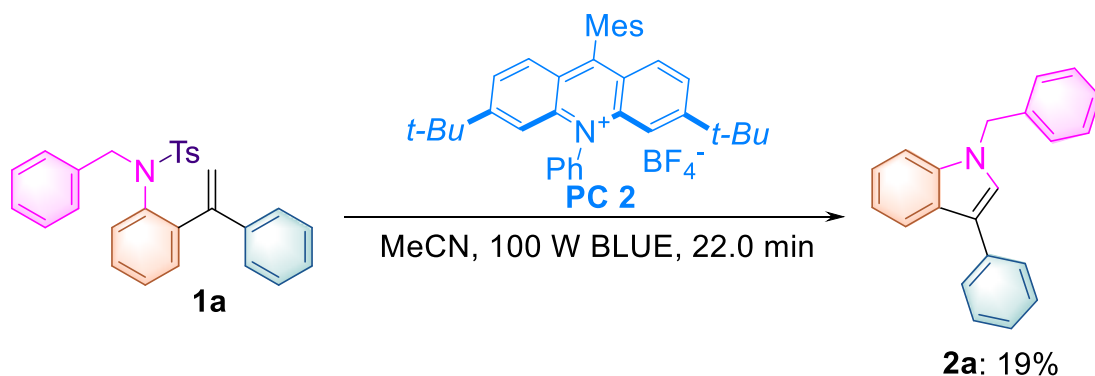

A cuvette equipped with a magnetic stir bar was added substrate **1a** (0.1 mmol, 1.0 equiv) and degassed acetonitrile (2.0 mL). Record the value of blank sample after which **PC 2** (2.0 mol%) was added at room temperature. The heterogeneous mixture was placed at a distance (app. 10.0 cm) from 100 W Blue LED irradiation for 22.0 min, The reaction mixture was concentrated in *vacuo* and analyzed by  $^1\text{H}$  NMR spectrum using 1,3,5-trimethoxybenzene as an internal standard. The quantum yield is calculated to be 1.77.

$$\Phi = \frac{0.019 \times 10^{-3} \text{ mol} \times 6.022 \times 10^{23} \times 6.626 \times 10^{-34} \text{ J}\cdot\text{s} \times 2.998 \times 10^8 \text{ m}\cdot\text{s}^{-1}}{(11.7 \times 10^{-4} \text{ W}\cdot\text{cm}^{-2} \times 2 \text{ cm}^2) \times 1320 \text{ s} \times 415 \times 10^{-9} \text{ m}} = 1.77$$

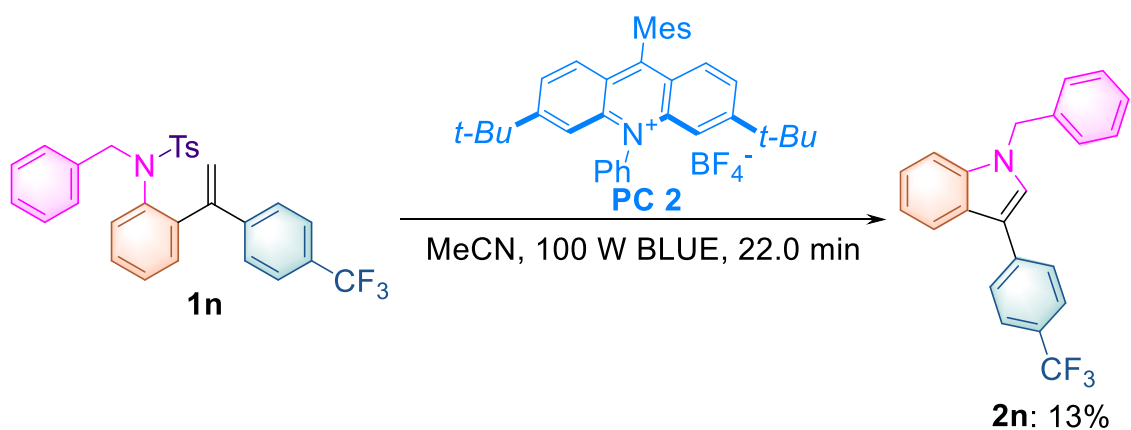

A cuvette equipped with a magnetic stir bar was added substrate **1n** (0.1 mmol, 1.0 equiv) and degassed acetonitrile (2.0 mL). Record the value of blank sample after which **PC 2** (2.0 mol%) was added at room temperature. The heterogeneous mixture was placed at a distance (app. 10.0 cm) from 100 W Blue LED irradiation for 22.0 min, The reaction mixture was concentrated in *vacuo* and analyzed by  $^1\text{H}$  NMR spectrum using 1,3,5-trimethoxybenzene as an internal standard. The quantum yield is calculated to be 0.17.

$$\Phi = \frac{0.013 \times 10^{-3} \text{ mol} \times 6.022 \times 10^{23} \times 6.626 \times 10^{-34} \text{ J} \cdot \text{s} \times 2.998 \times 10^8 \text{ m} \cdot \text{s}^{-1}}{(8.2 \times 10^{-3} \text{ W} \cdot \text{cm}^{-2} \times 2 \text{ cm}^2) \times 1320 \text{ s} \times 415 \times 10^{-9} \text{ m}} = 0.17$$

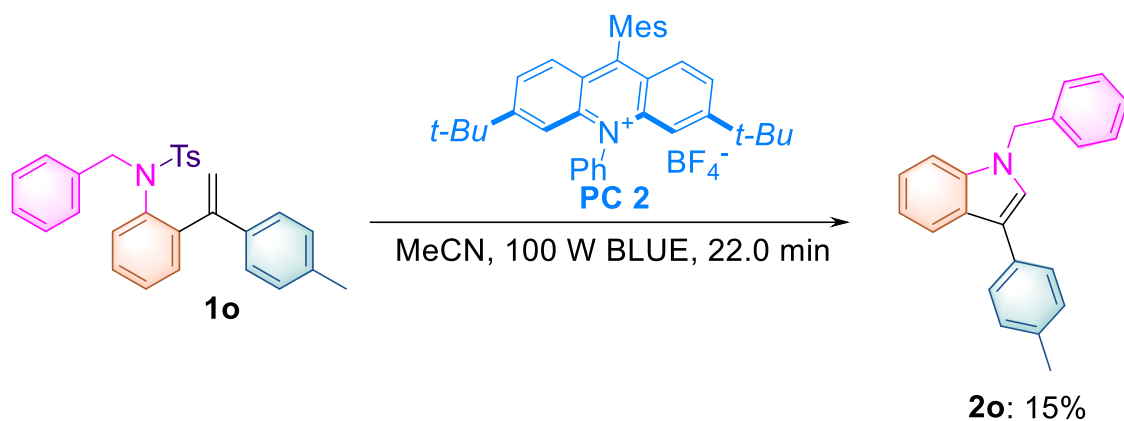

A cuvette equipped with a magnetic stir bar was added substrate **1o** (0.1 mmol, 1.0 equiv) and degassed acetonitrile (2.0 mL). Record the value of blank sample after which **PC 2** (2.0 mol%) was added at room temperature. The heterogeneous mixture was placed at a distance (app. 10.0 cm) from 100 W Blue LED irradiation for 22.0 min, The reaction mixture was concentrated in *vacuo* and analyzed by  $^1\text{H}$  NMR spectrum using 1,3,5-trimethoxybenzene as an internal standard. The quantum yield is calculated to be 0.18.

$$\Phi = \frac{0.015 \times 10^{-3} \text{ mol} \times 6.022 \times 10^{23} \times 6.626 \times 10^{-34} \text{ J} \cdot \text{s} \times 2.998 \times 10^8 \text{ m} \cdot \text{s}^{-1}}{(8.9 \times 10^{-3} \text{ W} \cdot \text{cm}^{-2} \times 2 \text{ cm}^2) \times 1320 \text{ s} \times 415 \times 10^{-9} \text{ m}} = 0.18$$

### 6.3 Emission Quenching Studies

All the emission intensities were recorded by Varian Cary Eclipse spectrometer. Solutions of **PC 2** ( $5.0 \times 10^{-3}$  M) was added with **1a** (1.0 M) or **2a** (1.0 M) or **2m** (1.0 M) in dry MeCN upon excitation at 415 nm and the emission intensity was collected at 503 - 508 nm. Solution was introduced to a 1.0 cm path length quartz cuvette equipped with a Teflon® septum.

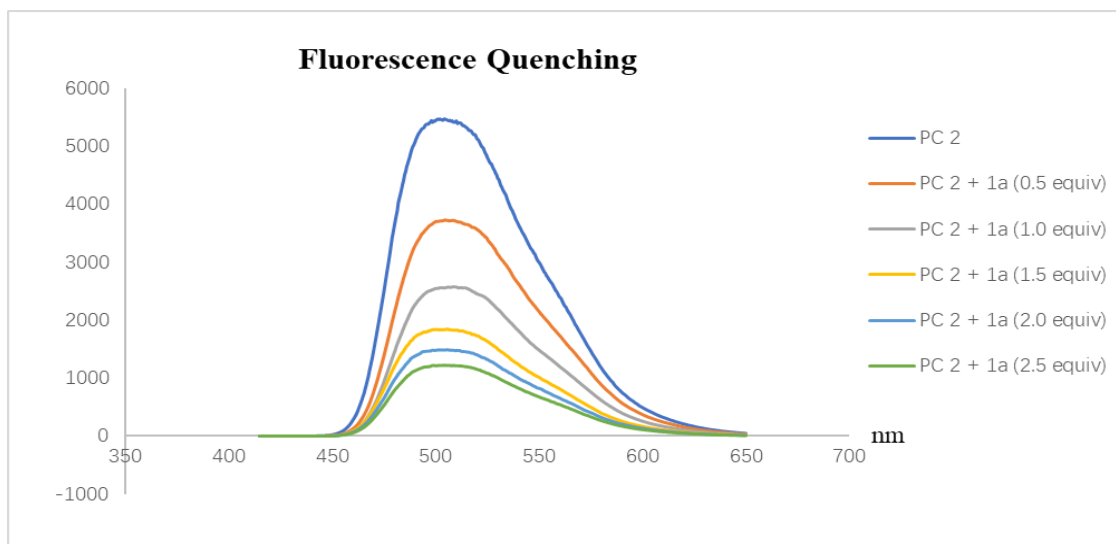

**Figure S1.** Fluorescence quenching experiment of **1a**

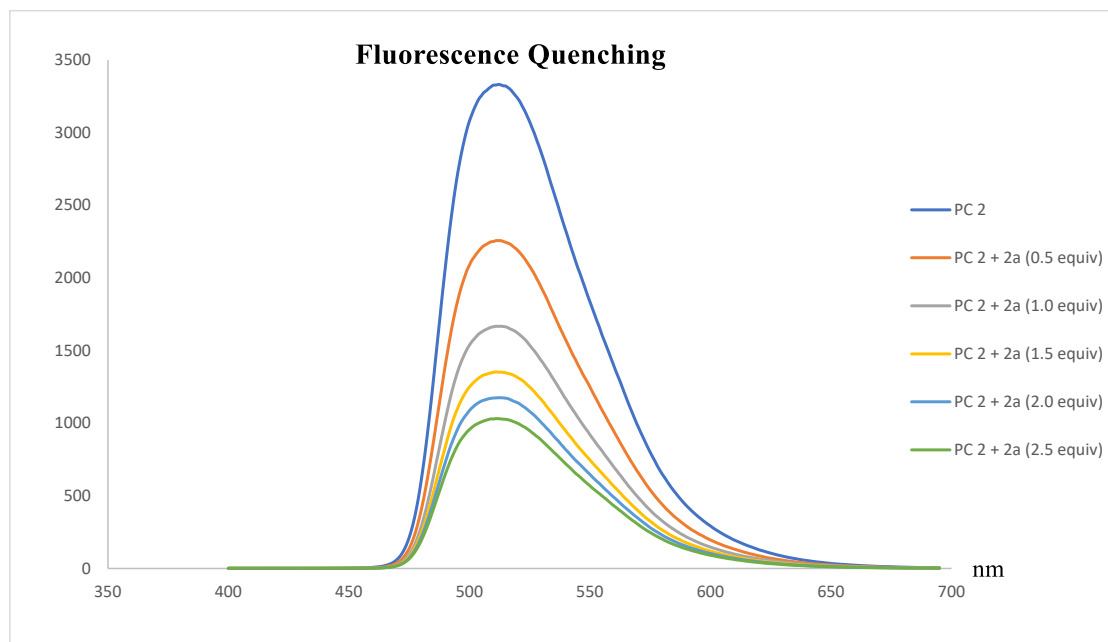

**Figure S2.** Fluorescence quenching experiment of **2a**

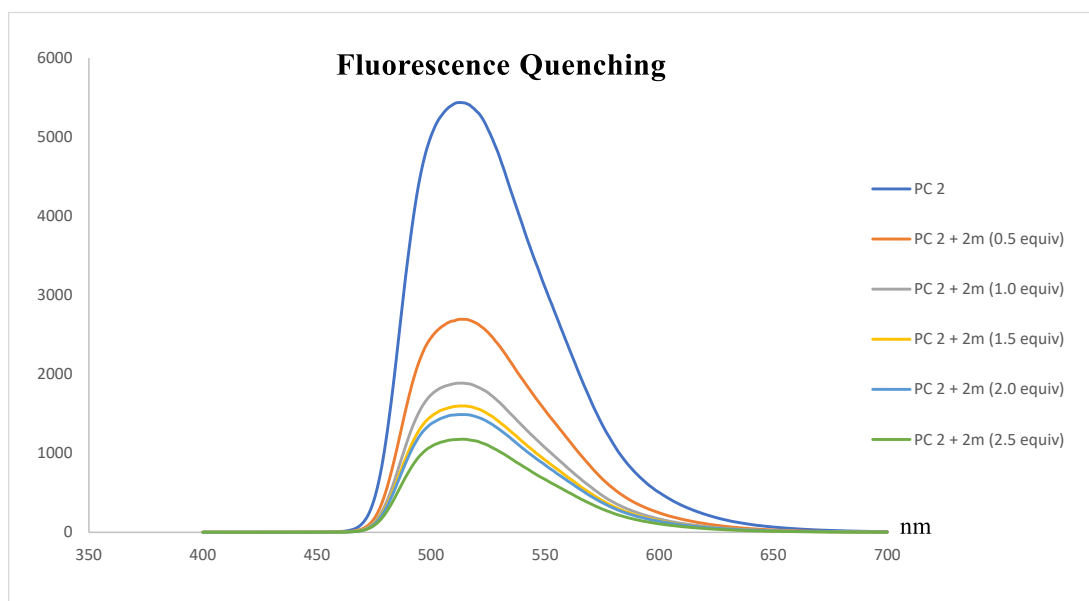

**Figure S3.** Fluorescence quenching experiment of **2m**

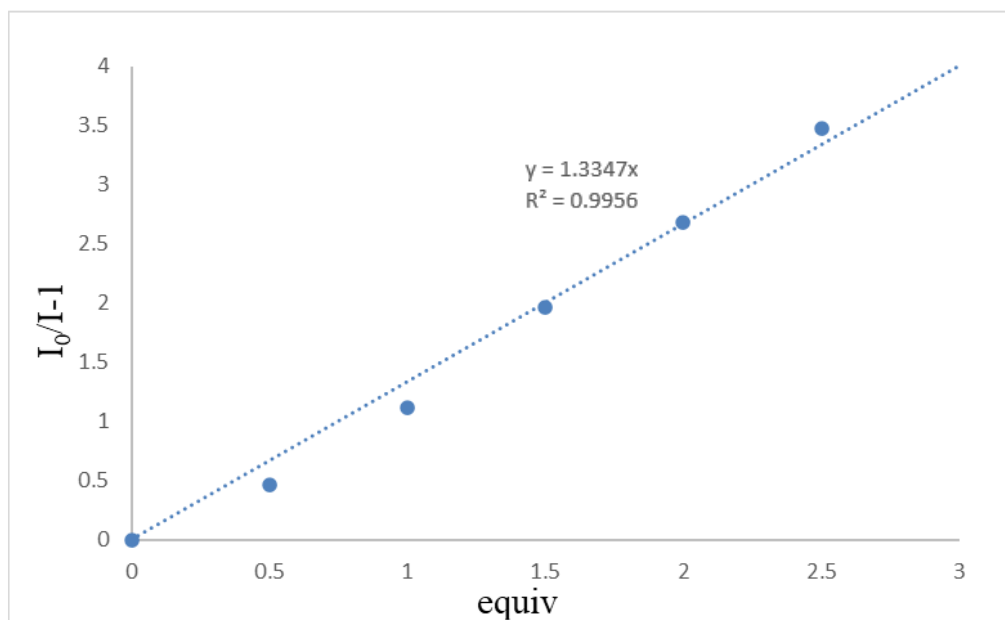

**Figure S4.** Stern-Volmer experiments of **1a**

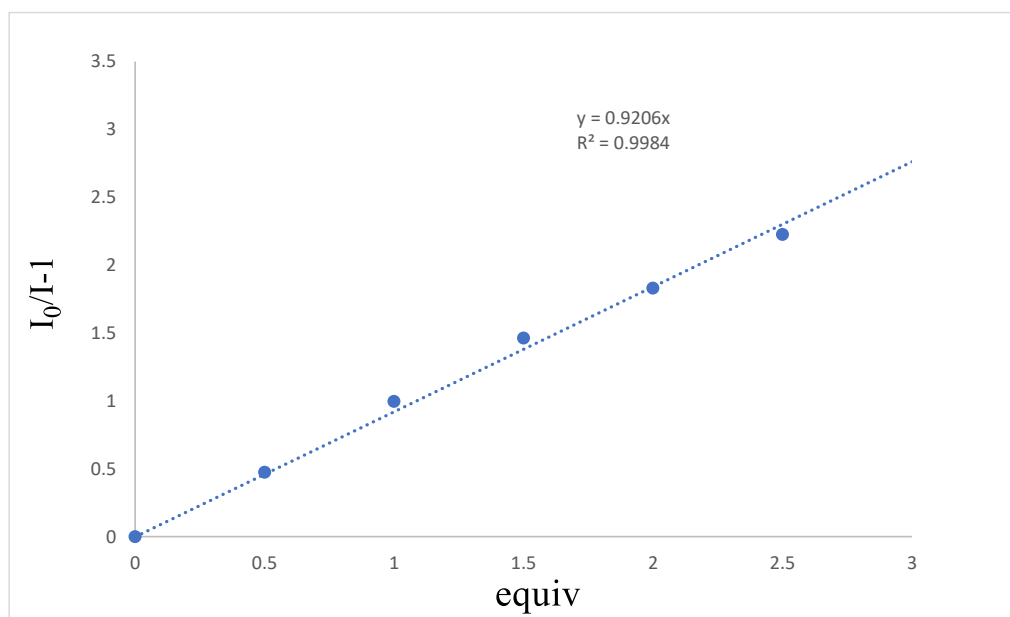

**Figure S5.** Stern-Volmer experiments of **2a**

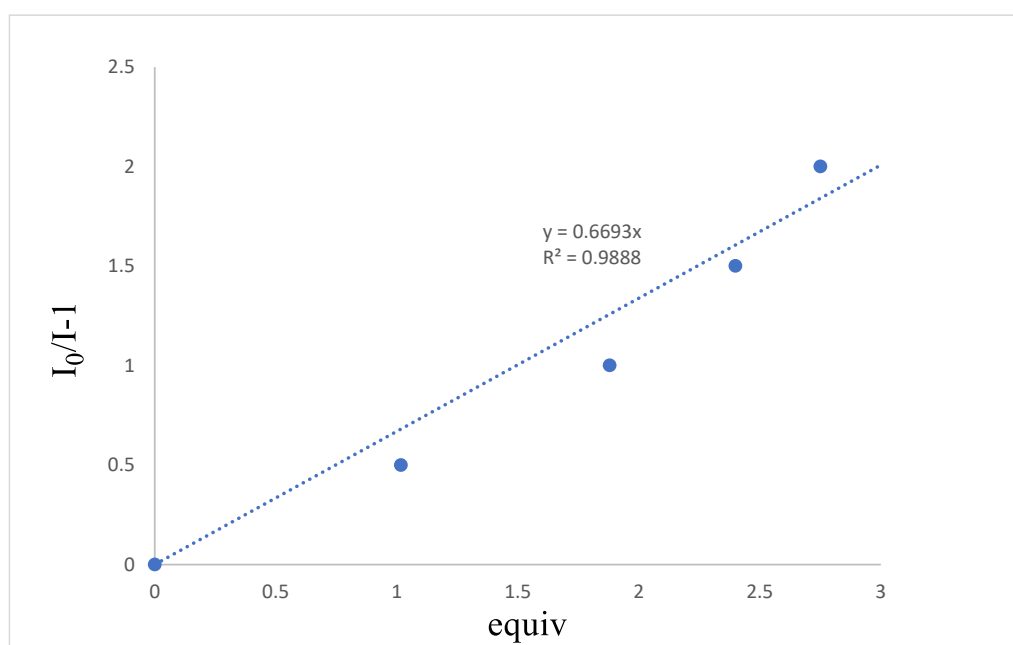

**Figure S6.** Stern-Volmer experiments of **2m**

To get a more accurate result, Stern-Volmer experiments were repeated at a lower concentration. Solutions of **PC 2** ( $5.0 \times 10^{-5}$  M) was added with **1a** (1.0 M) or **2a** (1.0 M) in dry MeCN upon excitation at 415 nm and the emission intensity was collected at 503 - 508 nm. Solution was introduced to a 1.0 cm path length quartz cuvette equipped with a Teflon® septum. Similar results as mentioned above were obtained.

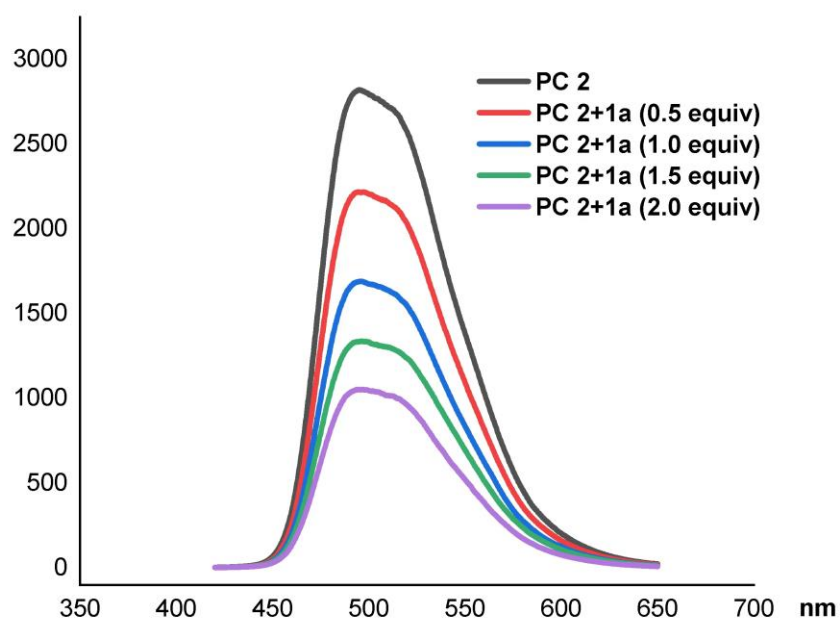

**Figure S7.** Fluorescence quenching experiment of **1a**

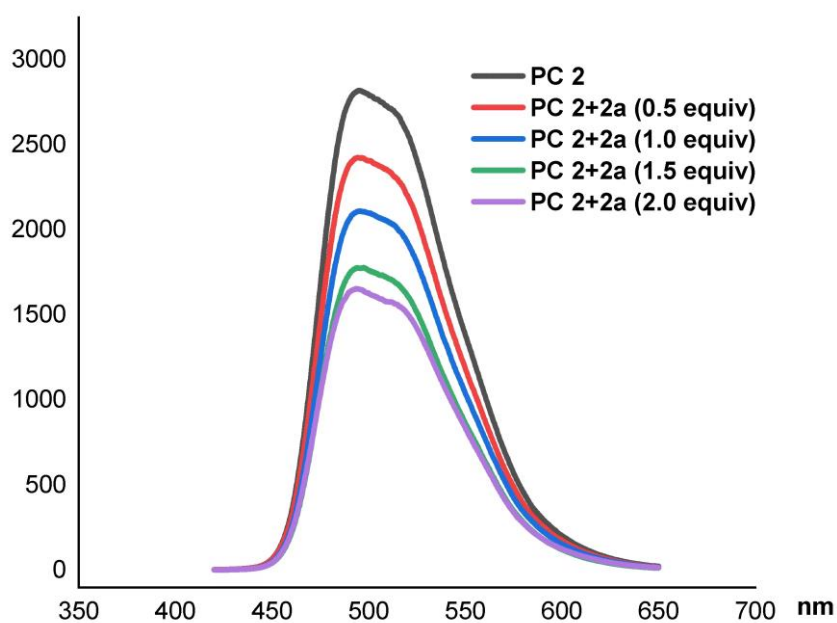

**Figure S8.** Fluorescence quenching experiment of **2a**

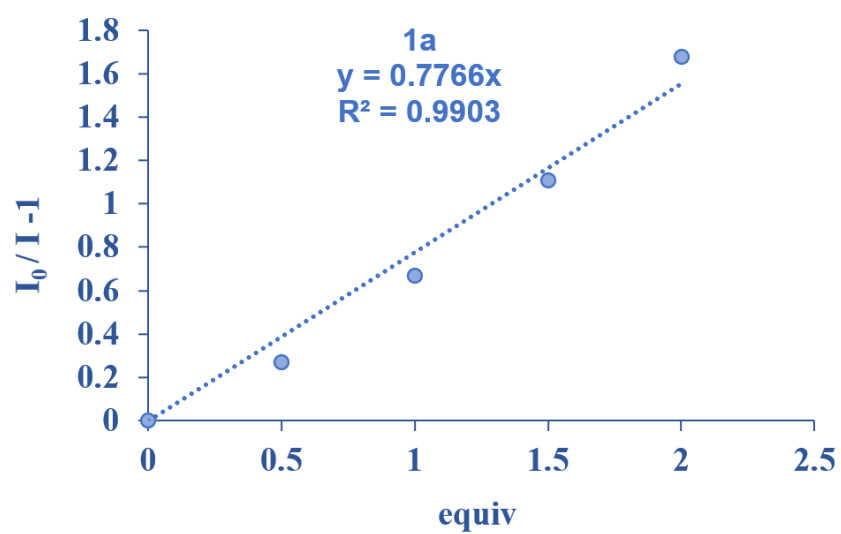

**Figure S9.** Stern-Volmer experiments of **1a**

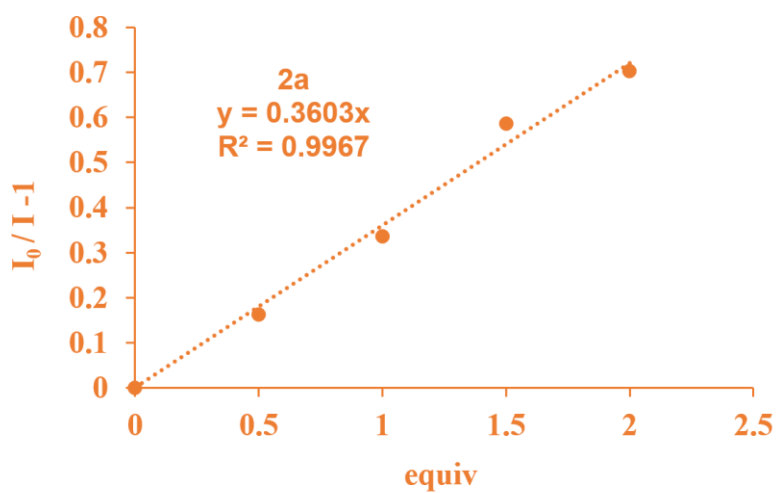

**Figure S10.** Stern-Volmer experiments of **2a**

## 6.4 Cyclic Voltammetry Experiments

Cyclic Voltammetry was performed on a CH Instruments Electrochemical Workstation model CS350H. A solution of the substrates **1a** in MeCN (0.2 M) was tested with 0.2 M Bu<sub>4</sub>NPF<sub>6</sub> as the supporting electrolyte, using a glassy carbon as the working electrode, a Pt as the counter electrode, and a saturated calomel electrode reference electrode. Ar was bubbled into the system for 20.0 min to degas the solution. Scan rate = 0.1 V/s, 2 sweep segments, a sample interval of 0.001 V.

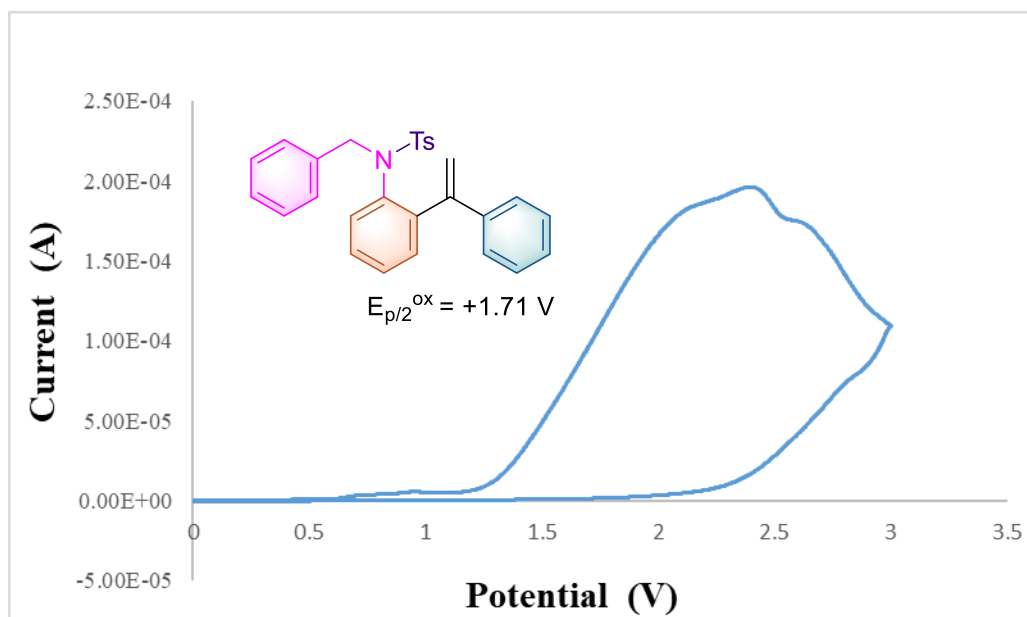

Figure S11. Oxidative potential of **1a**

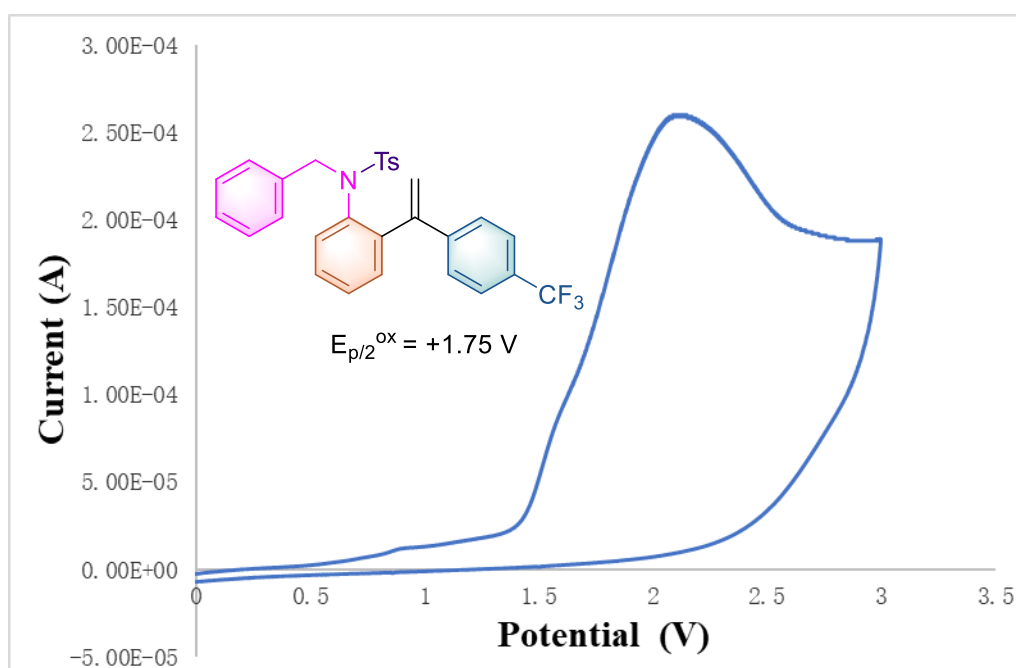

Figure S12. Oxidative potential of **1n**

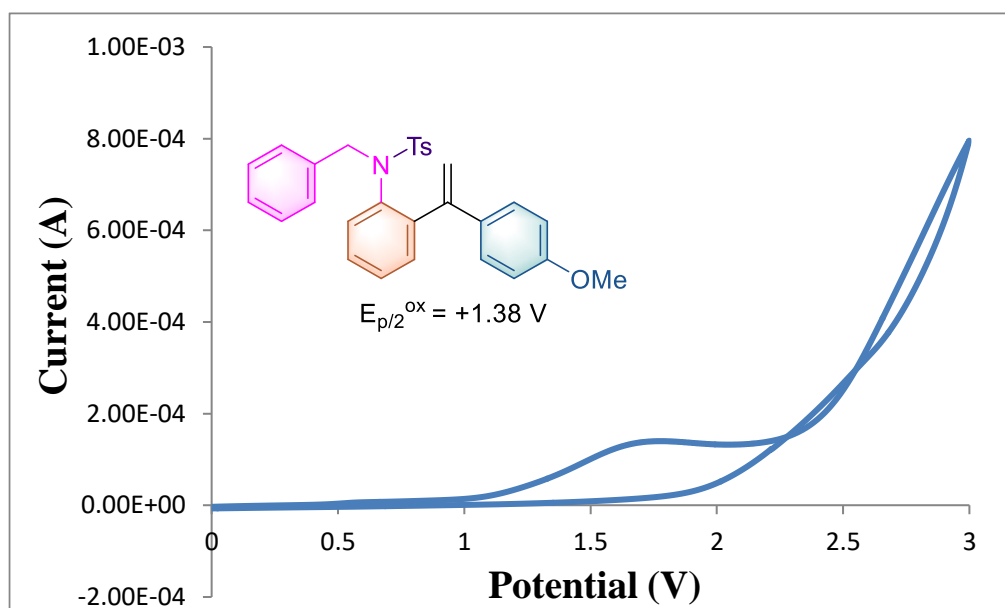

**Figure S13.** Oxidative potential of **1q**

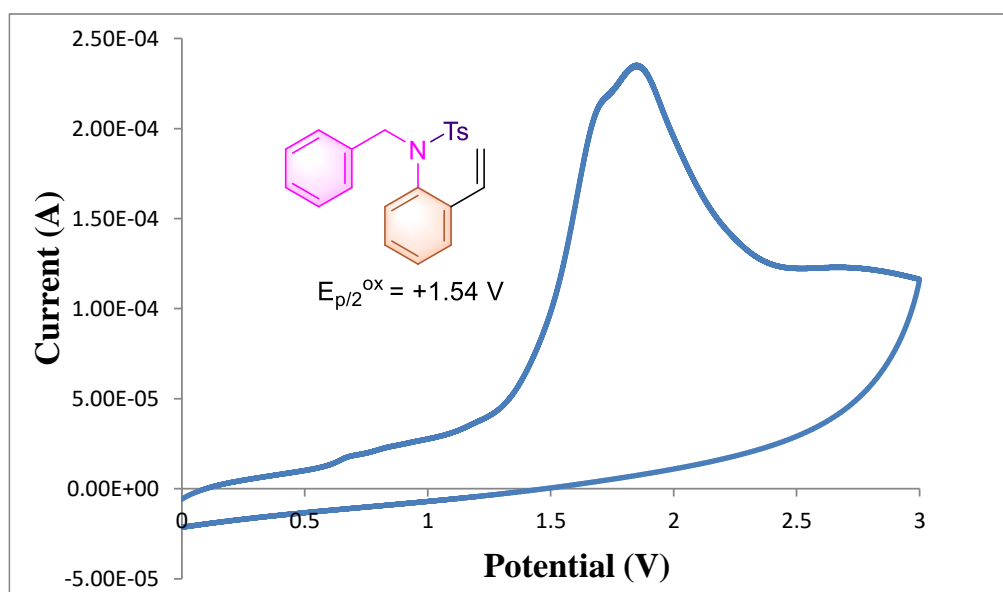

**Figure S14.** Oxidative potential of **1at**

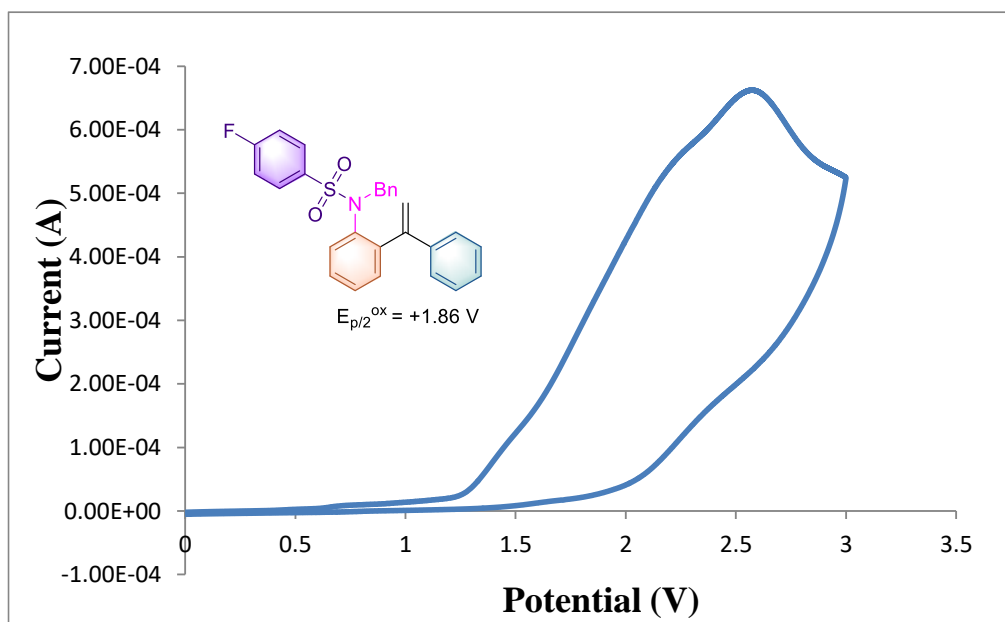

**Figure S15.** Oxidative potential of **1az**

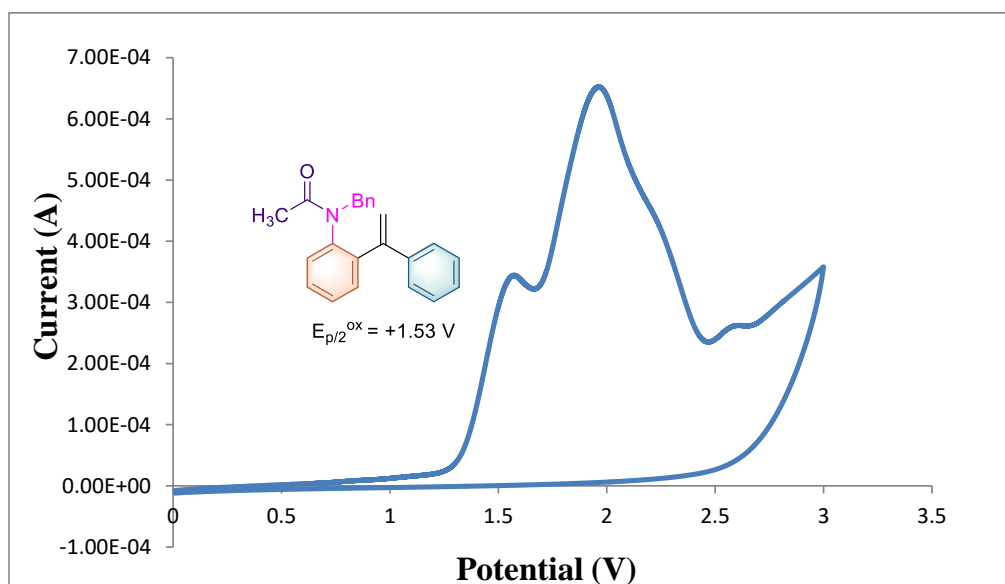

**Figure S16.** Oxidative potential of **1aaj**

## 6.5 Kinetic Experiment and Hammett plot

To a stirred solution of **1** (0.1 mmol, 1.0 equiv) was added **PC 2** (2.0 mol%) in degassed MeCN (2.0 mL) under argon atmosphere and the mixture was irradiated with 385 nm LED for 15.0 min, 20.0 min and 25.0 min. After the removal of solvent under reduced pressure, the yields of products **2** were measured by NMR spectroscopy using 1,3,5-trimethoxybenzene as an internal standard.

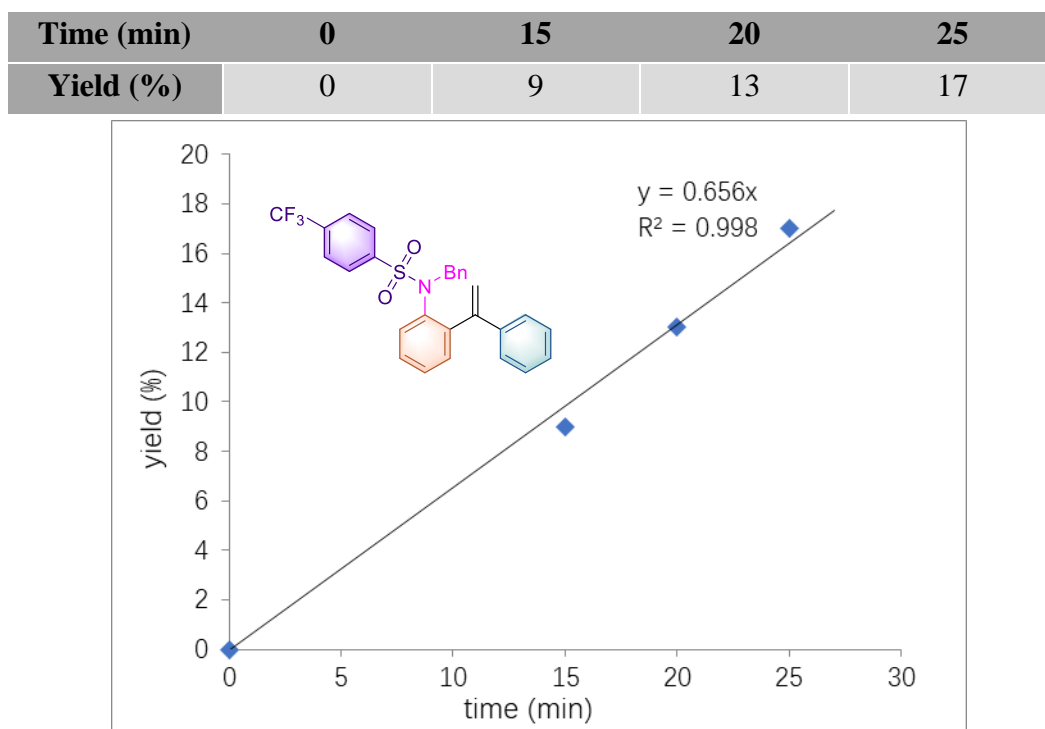

**Figure S17.** Rate constant of **1aac**

| Time (min) | 0 | 15 | 20 | 25 |
|------------|---|----|----|----|
| Yield (%)  | 0 | 14 | 18 | 21 |

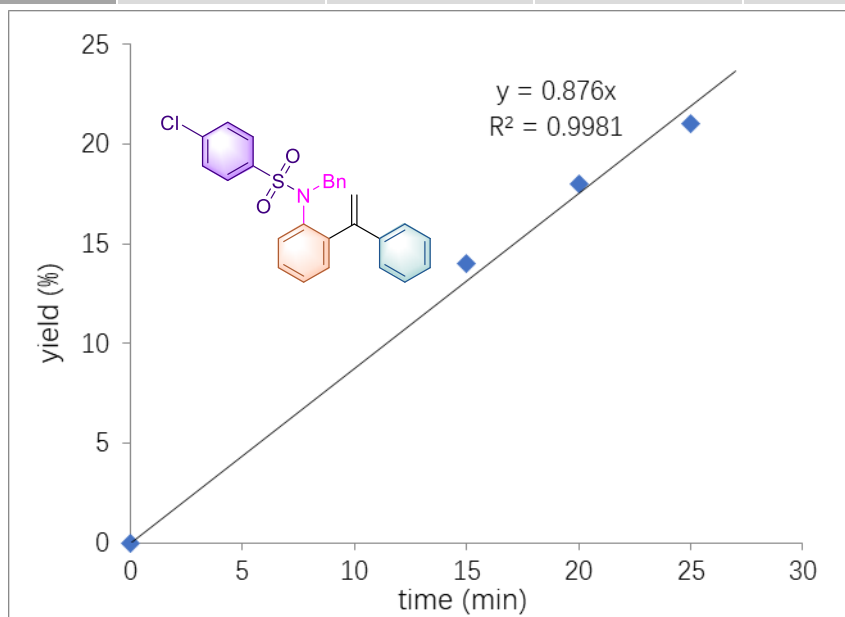

**Figure S18.** Rate constant of **1aaa**

| Time (min) | 0 | 15 | 20 | 25 |
|------------|---|----|----|----|
| Yield (%)  | 0 | 16 | 21 | 24 |

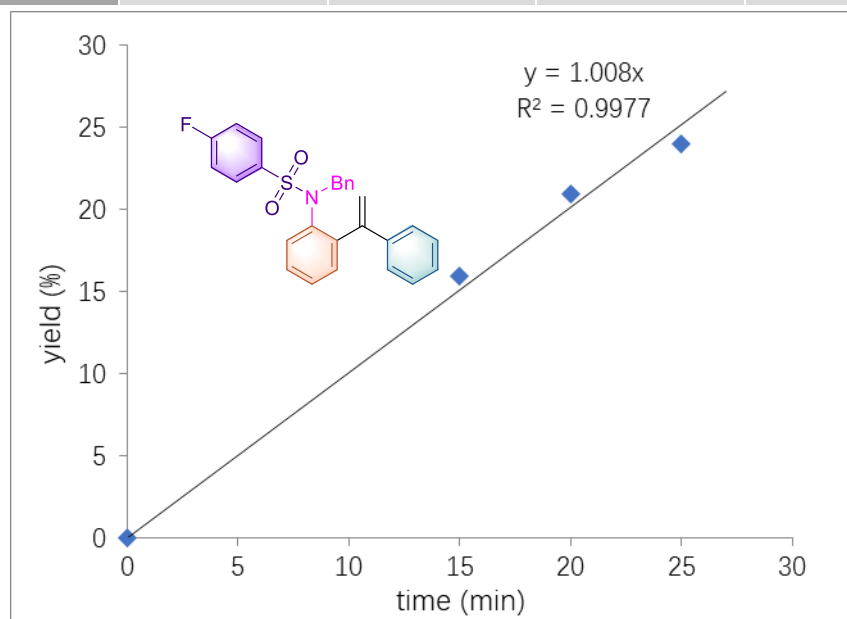

**Figure S19.** Rate constant of **1az**

| Time (min) | 0 | 15 | 20 | 25 |
|------------|---|----|----|----|
| Yield (%)  | 0 | 18 | 23 | 26 |

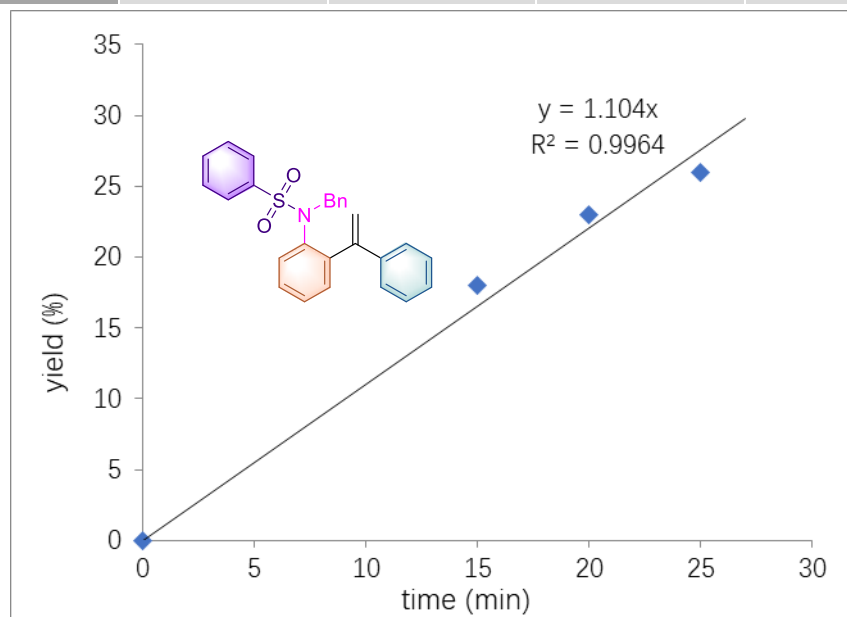

**Figure S20.** Rate constant of **1aw**

| Time (min) | 0 | 15 | 20 | 25 |
|------------|---|----|----|----|
| Yield (%)  | 0 | 21 | 27 | 31 |

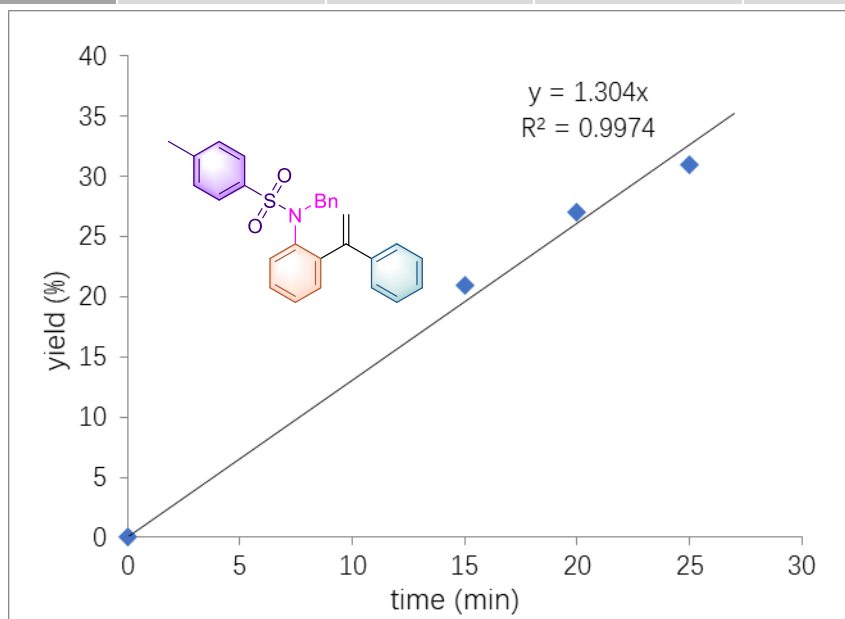

**Figure S21.** Rate constant of **1a**

| Time (min) | 0 | 15 | 20 | 25 |
|------------|---|----|----|----|
| Yield (%)  | 0 | 22 | 29 | 33 |

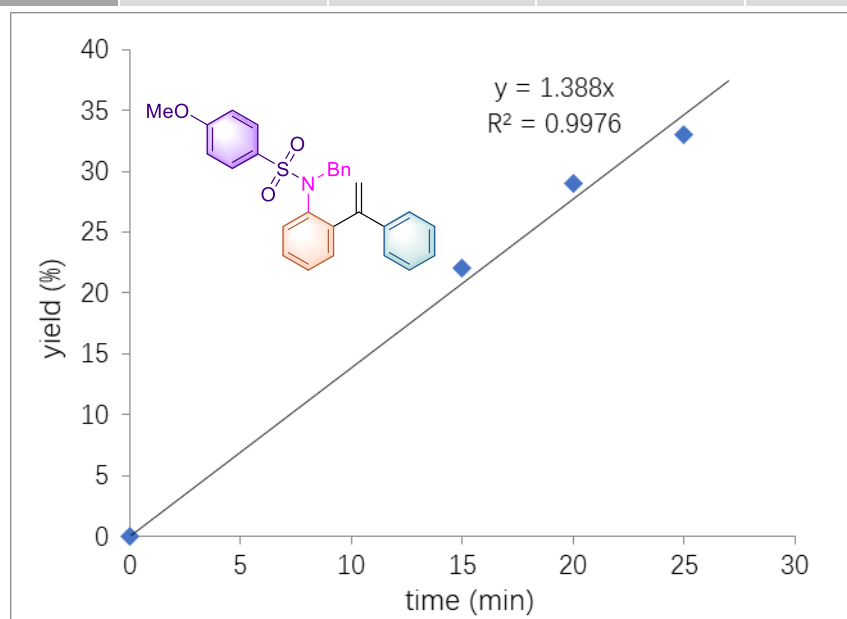

**Figure S22.** Rate constant of **1aab**

| Time (min) | 0 | 15 | 20 | 25 |
|------------|---|----|----|----|
| Yield (%)  | 0 | 5  | 6  | 8  |

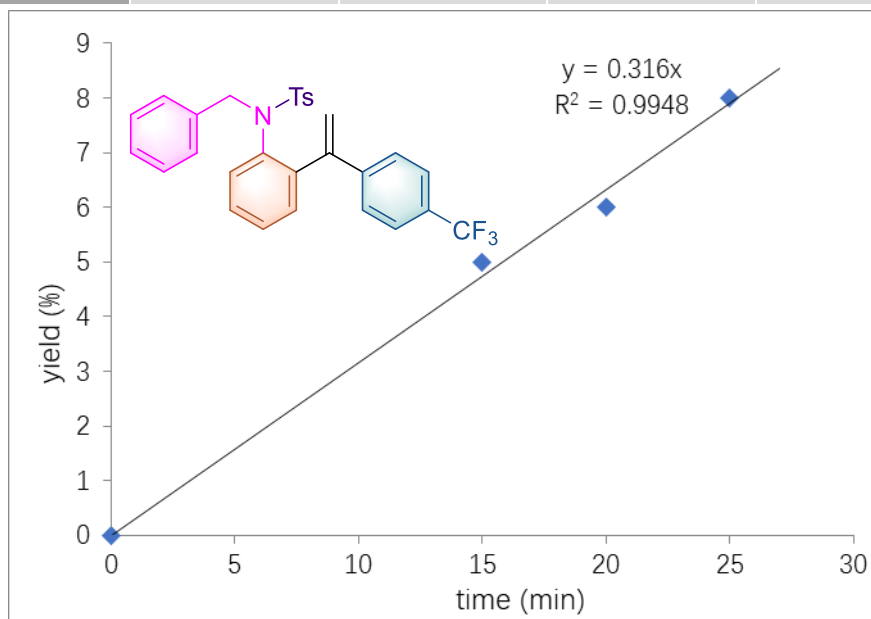

**Figure S23.** Rate constant of **1n**

| Time (min) | 0 | 15 | 20 | 25 |
|------------|---|----|----|----|
| Yield (%)  | 0 | 18 | 22 | 27 |

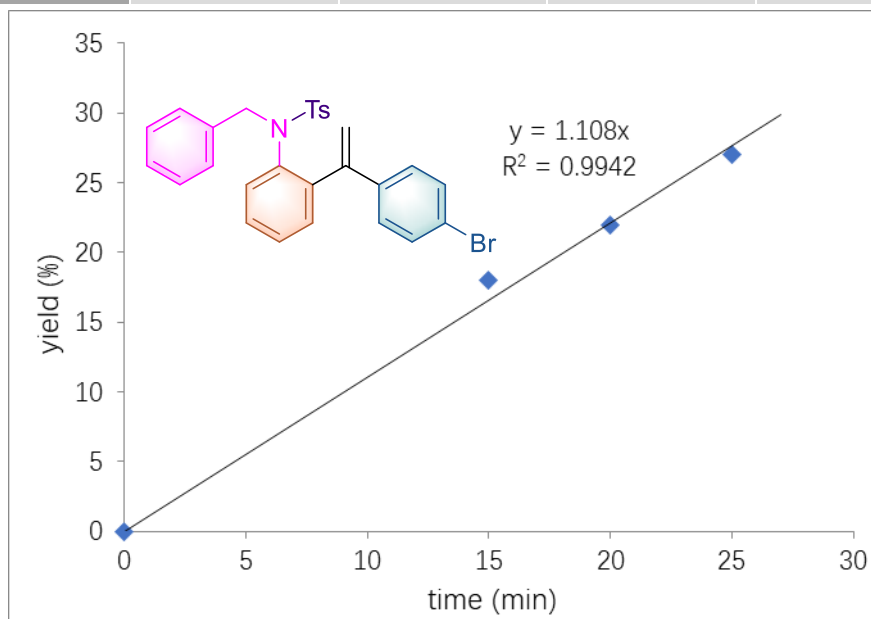

**Figure S24.** Rate constant of **11**

| Time (min) | 0 | 15 | 20 | 25 |
|------------|---|----|----|----|
| Yield (%)  | 0 | 20 | 24 | 28 |

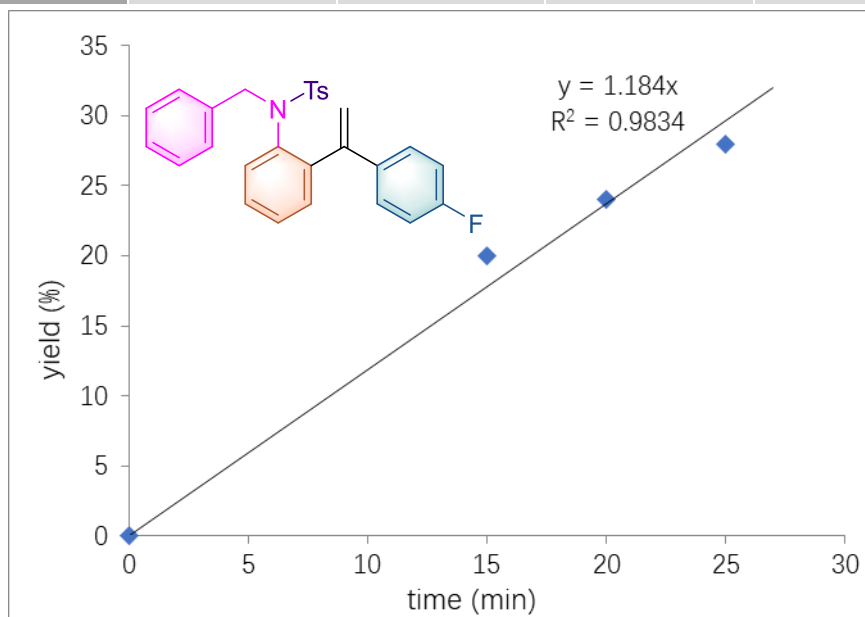

**Figure S25.** Rate constant of **1m**

| Time (min) | 0 | 15 | 20 | 25 |
|------------|---|----|----|----|
| Yield (%)  | 0 | 5  | 7  | 8  |

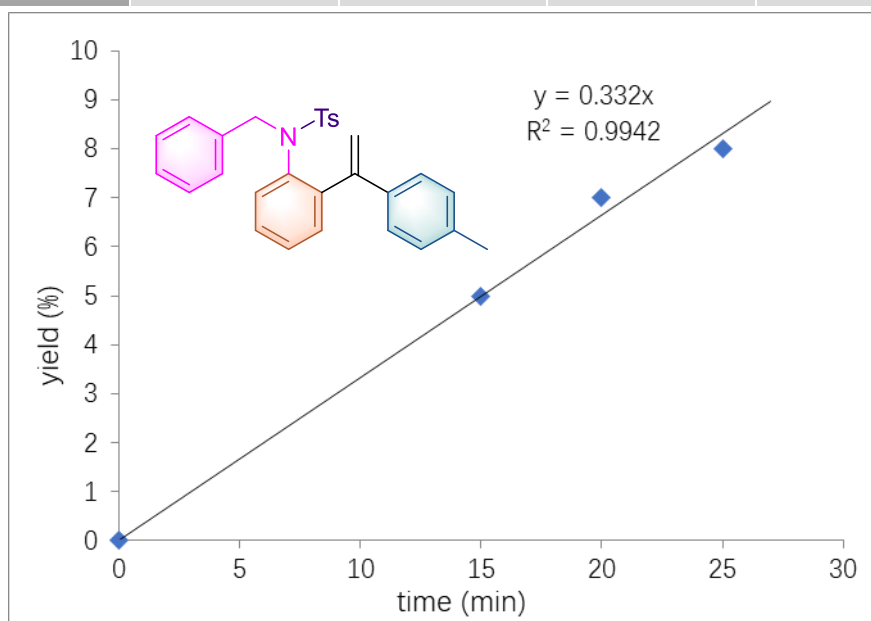

**Figure S26.** Rate constant of **1o**

| substituent     | $k_X$ | $k_X / k_H$ | $\log (k_X / k_H)$ | $\sigma_p$ |
|-----------------|-------|-------------|--------------------|------------|
| OMe             | 1.388 | 1.2572      | 0.0994             | -0.27      |
| CH <sub>3</sub> | 1.304 | 1.1812      | 0.0723             | -0.17      |
| H               | 1.104 | -           | -                  | -          |
| F               | 1.008 | 0.9130      | -0.0395            | 0.06       |
| Cl              | 0.876 | 0.7935      | -0.1005            | 0.23       |
| CF <sub>3</sub> | 0.656 | 0.5942      | -0.2261            | 0.54       |

**Hammett plot on *para*-arylsulfonyl site**

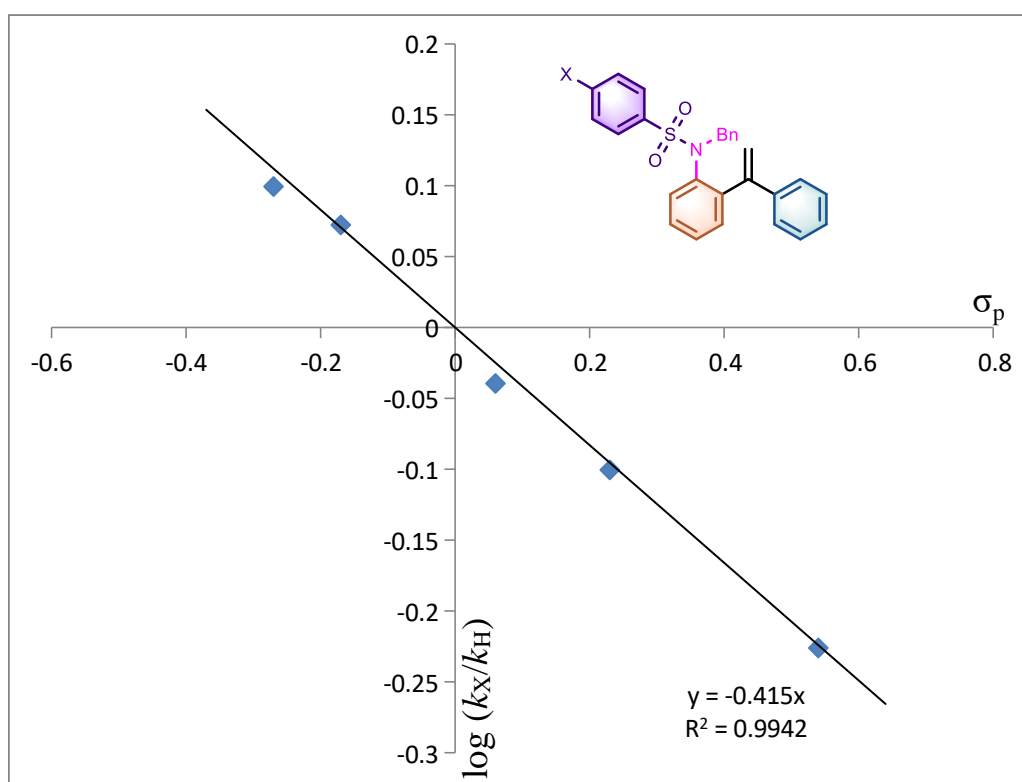

**Figure S27.** Hammett plot study on the *para*-arylsulfonyl site

## 6.6 The MS spectra of TsH and TsD

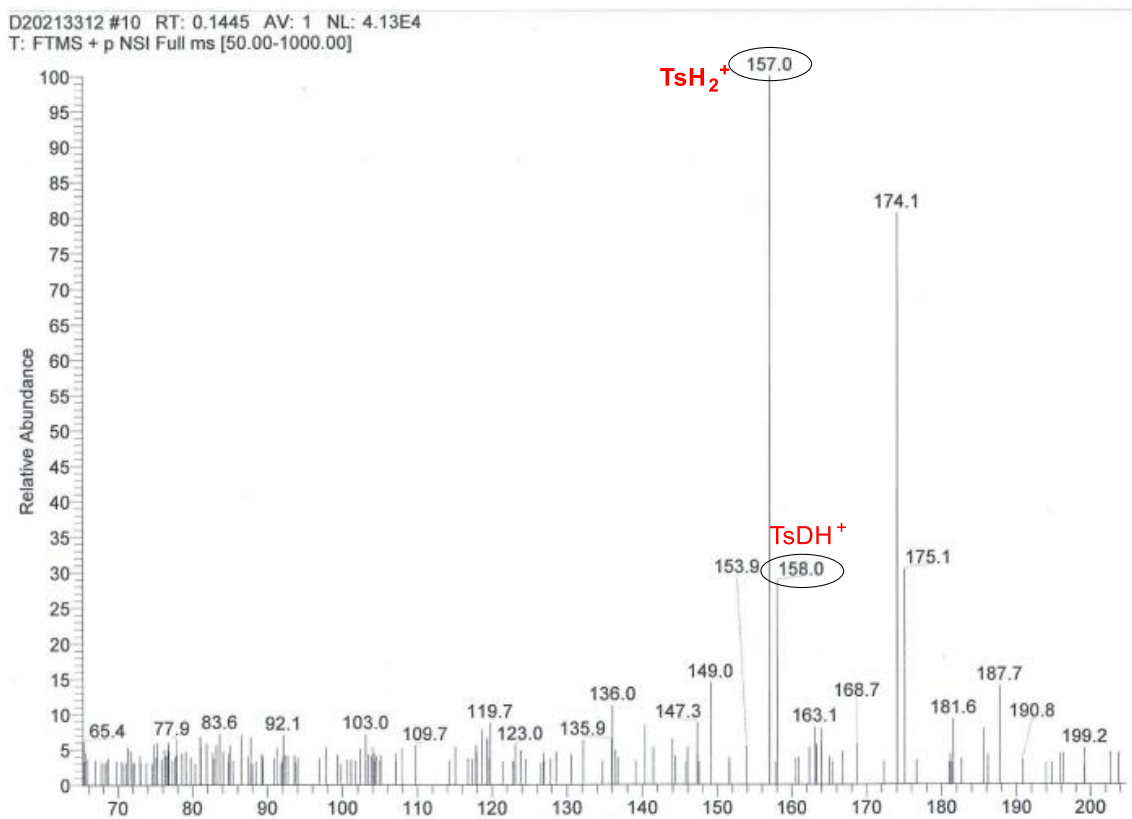

Figure S28. The MS spectra of TsH and TsD

## 6.7 NOE spectrum of remained 1ao after the reaction

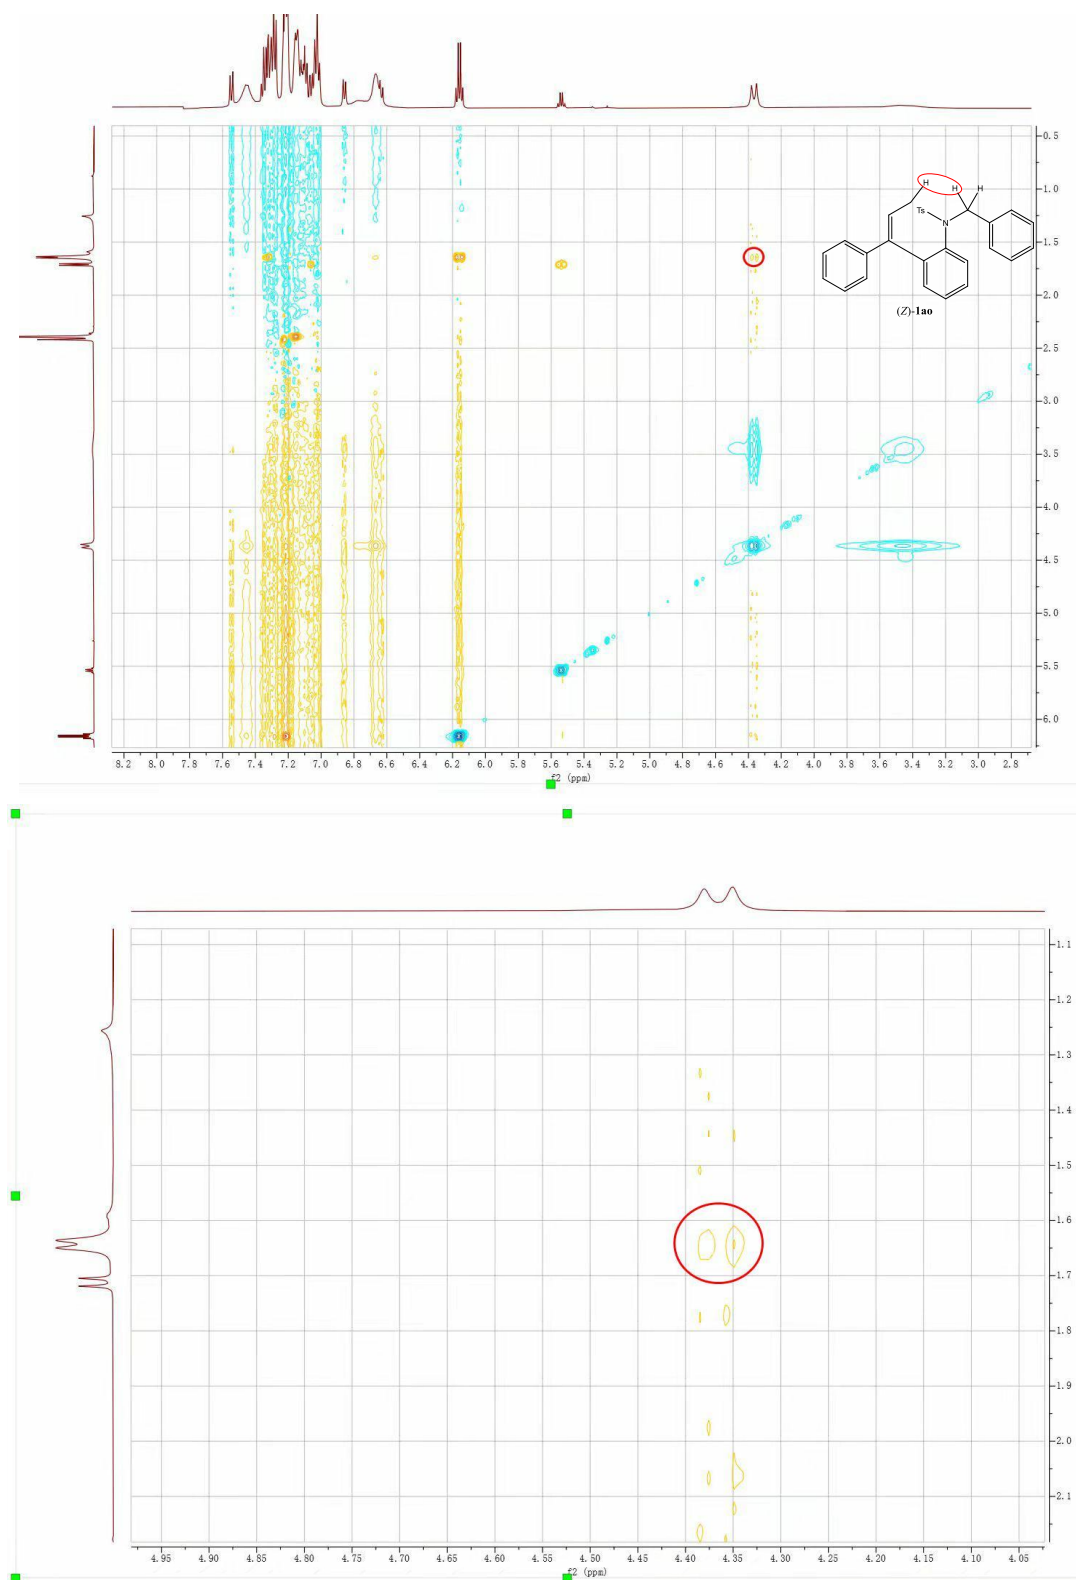

**Figure S29.** The NOE spectrum of **1ao** after the reaction

## 6.8 Radical clock experiment

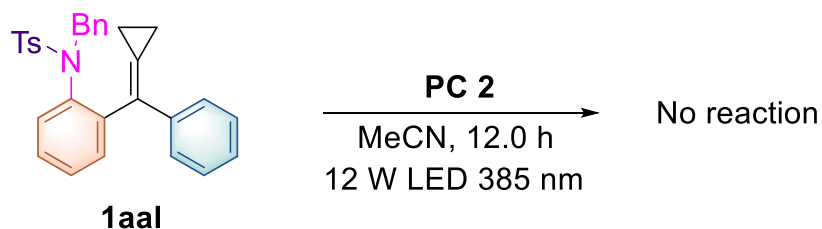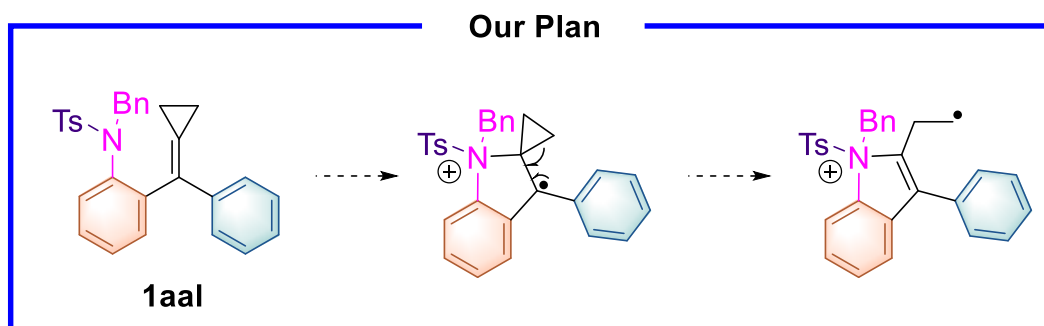

To a stirred solution of **1aal** (0.1 mmol, 1.0 equiv) was added **PC 2** (2.0 mol%) in degassed MeCN (2.0 mL) under argon atmosphere and the reaction mixture was irradiated with 385 nm LED 12. h. After the removal of solvent under reduced pressure, the residue was purified by a column chromatography on silica gel (petroleum ether / ethyl acetate = 10 / 1). This result showed that the substrate **1aal** did not undergo the expected reaction under the standard conditions, presumably due to the steric effect.

## 7. KIE Experiment

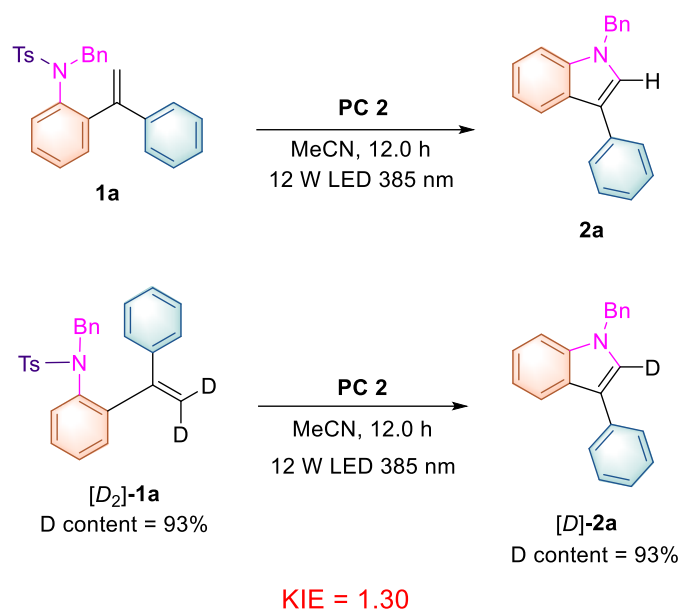

To a stirred solution of **1a** (0.1 mmol, 1.0 equiv) was added **PC 2** (2.0 mol%) in degassed MeCN (2.0 mL) under argon atmosphere in one sealed tube and  $[D_2]$ -**1a** (1.0 mmol, 1.0 equiv) was added **PC 2** (2.0 mol%) in degassed MeCN (2.0 mL) under argon atmosphere in another sealed tube and then the mixture was irradiated with 385 nm LED for 10.0 min, 15.0 min, 30.0 min and 40.0 min, respectively. After the removal of solvent under reduced pressure, the yields of products **2a** and  $[D]$ -**2a** were measured by NMR spectroscopy using 1,3,5-trimethoxybenzene as an internal standard. The corresponding kinetic isotope effect outcomes were shown in Fig. S24.

| Time (min) | 10 | 15 | 30 | 40 |
|------------|----|----|----|----|
| Yield (%)  | 18 | 23 | 46 | 62 |
|            | 14 | 21 | 36 | 46 |

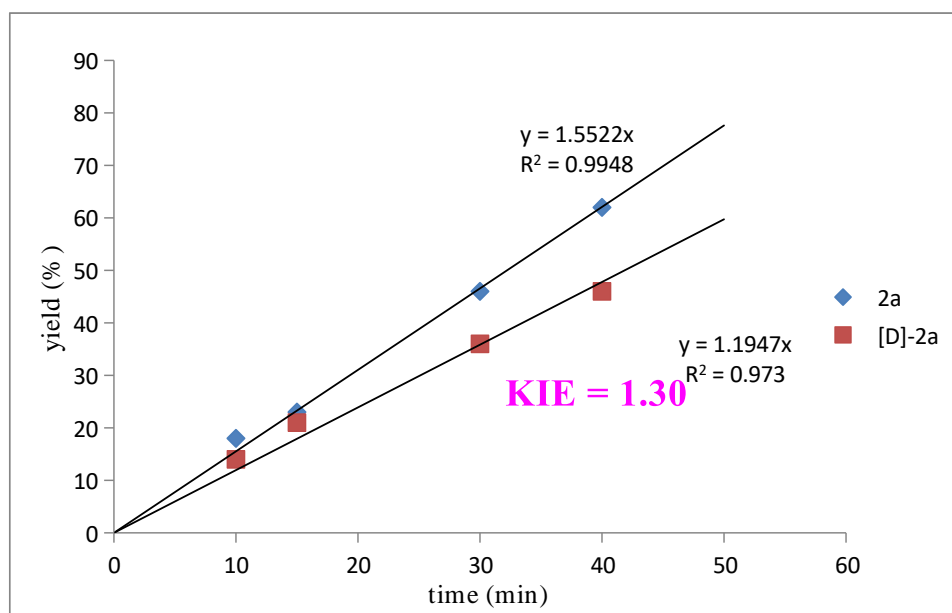

**Figure S30.** The experiments on the kinetic isotope effect from **1a** to **2a**

## 8. Characterization Data of Substrates 1

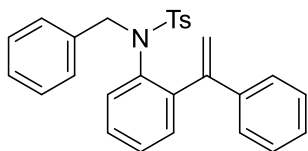

**Compound 1a:** Yield: 1186 mg, 90%; a yellow oil; Eluent: PE/EA = 10/1.  $^1\text{H}$  NMR (400 MHz,  $\text{CDCl}_3$ , TMS)  $\delta$  2.40 (s, 3H), 4.00-4.60 (m, 2H), 5.10 (s, 1H), 5.64 (s, 1H), 6.85 (d,  $J = 6.4$  Hz, 2H), 6.94 (d,  $J = 7.6$  Hz, 1H), 7.03-7.35 (m, 13H), 7.50 (d,  $J = 7.6$  Hz, 2H);  $^{13}\text{C}\{^1\text{H}\}$ -NMR (101 MHz,  $\text{CDCl}_3$ , TMS)  $\delta_{\text{C}}$  21.5, 54.6, 117.2, 127.0, 127.6, 127.8, 127.9, 128.0, 128.06, 128.14, 129.2, 129.4, 130.8, 132.0, 135.5, 137.3, 137.4, 140.8, 142.3, 143.2, 145.9; IR (neat):  $\nu$  3060, 3028, 2921, 1596, 1493, 1342, 1154, 1089, 909, 813, 697  $\text{cm}^{-1}$ ; HRMS (ESI-TOF) Calcd for  $\text{C}_{28}\text{H}_{25}\text{NO}_2\text{NaS}$   $[\text{M}+\text{Na}]^+$ : 462.1498, found: 462.1508.

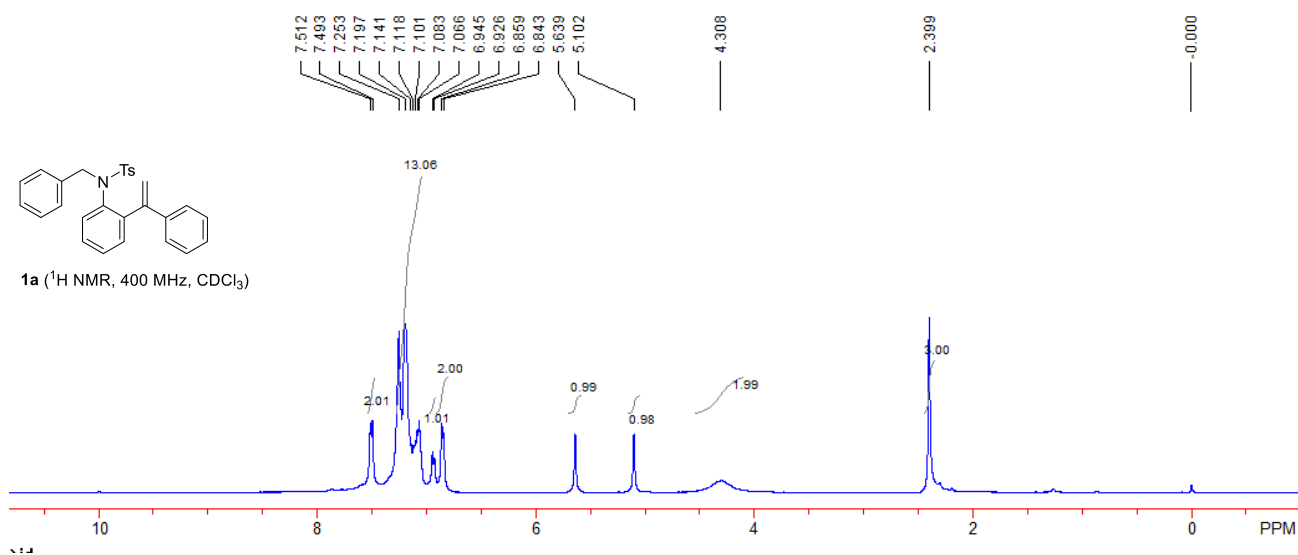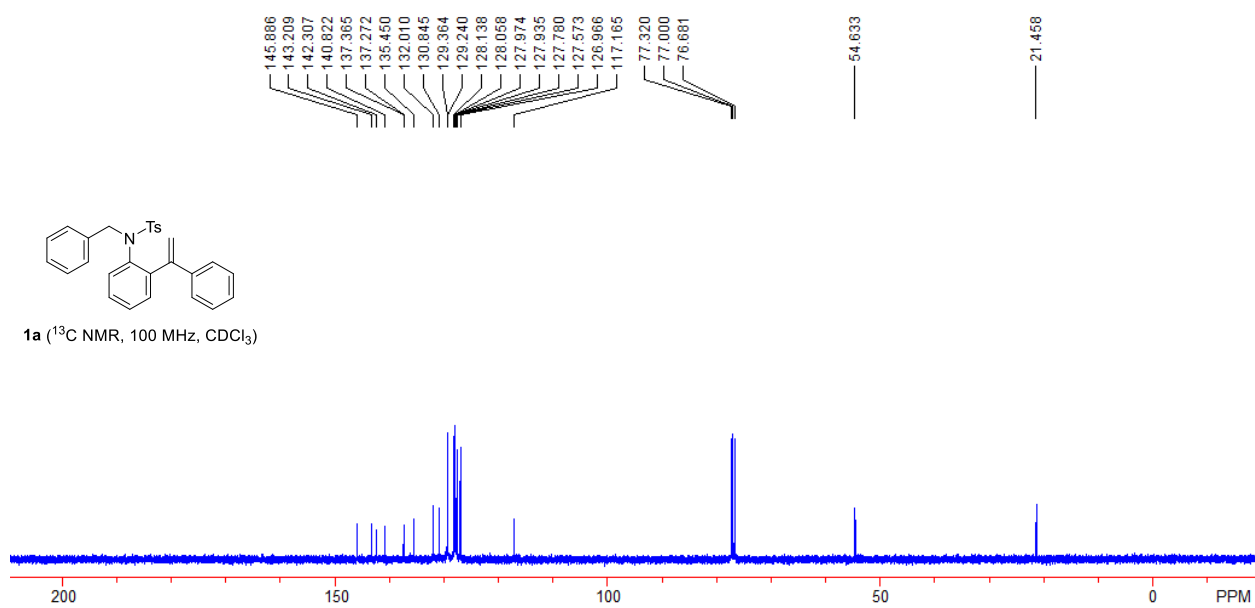

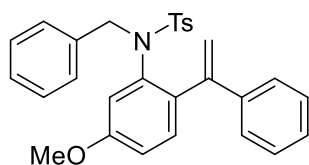

**Compound 1b:** Yield: 1338 mg, 80%; a yellow oil; Eluent: PE/EA = 5/1.  $^1\text{H}$  NMR (400 MHz,  $\text{CDCl}_3$ , TMS)  $\delta$  2.33 (s, 3H), 3.52 (s, 3H), 4.00–4.60 (m, 2H), 5.12 (s, 1H), 5.58 (s, 1H), 6.42–6.47 (m, 1H), 6.77 (d,  $J$  = 8.0 Hz, 1H), 6.89 (d,  $J$  = 6.4 Hz, 2H), 7.02–7.12 (m, 4H), 7.13–7.27 (m, 7H), 7.51 (d,  $J$  = 8.0 Hz, 2H);  $^{13}\text{C}\{^1\text{H}\}$ -NMR (101 MHz,  $\text{CDCl}_3$ , TMS)  $\delta_{\text{C}}$  21.2, 54.5, 54.9, 113.8, 115.9, 116.7, 126.9, 127.3, 127.4, 127.84, 127.88, 127.91, 129.1, 129.2, 132.3, 134.3, 135.3, 137.2, 138.0, 141.1, 143.1, 145.5, 158.4; IR (neat):  $\nu$  3029, 2928, 2835, 1602, 1493, 1341, 1235, 1193, 1028, 908, 813, 694  $\text{cm}^{-1}$ ; HRMS (ESI-TOF) Calcd for  $\text{C}_{29}\text{H}_{27}\text{NO}_3\text{NaS}$   $[\text{M}+\text{Na}]^+$ : 492.1604, found: 492.1596.

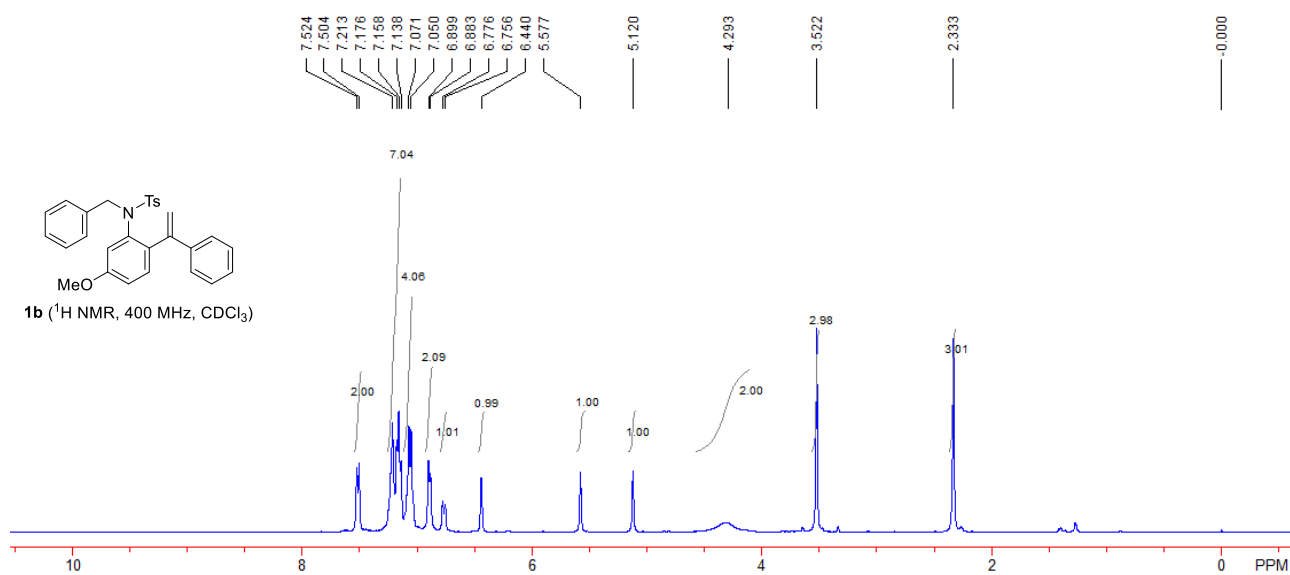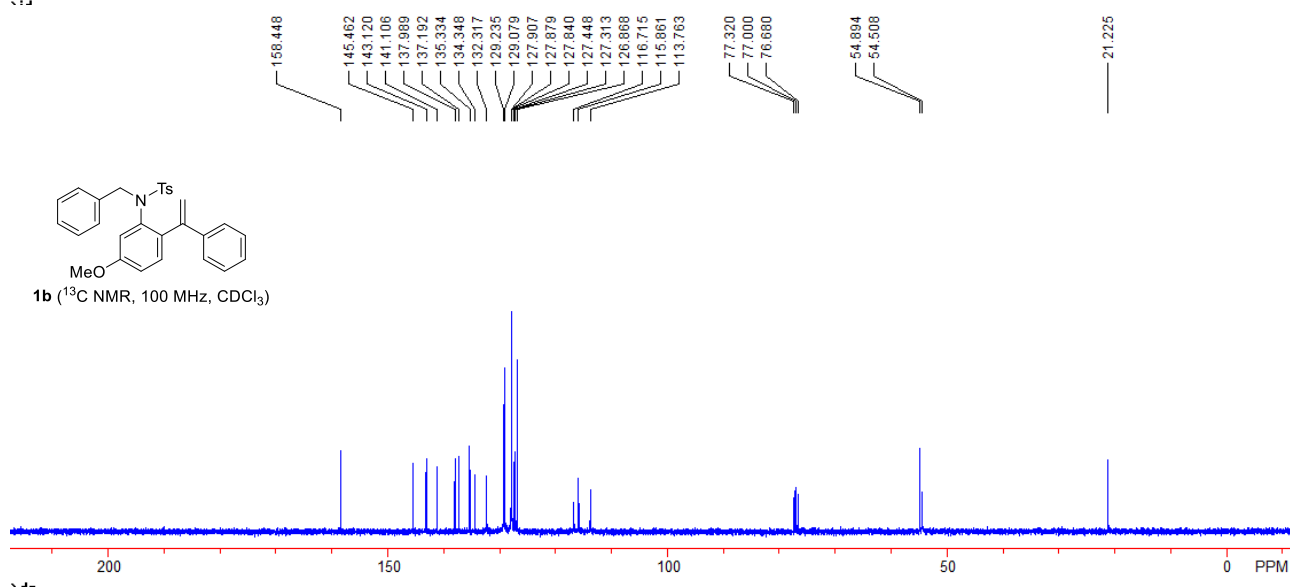

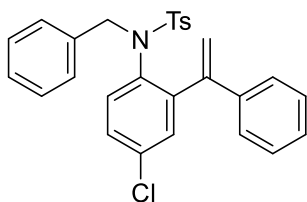

**Compound 1c:** Yield: 1812 mg, 88%; a yellow oil; Eluent: PE/EA = 10/1.  $^1\text{H}$  NMR (400 MHz,  $\text{CDCl}_3$ , TMS)  $\delta$  2.39 (s, 3H), 4.00-4.60 (m, 2H), 5.07 (s, 1H), 5.62 (s, 1H), 6.81-6.87 (m, 3H), 7.04-7.22 (m, 9H), 7.24-7.31 (m, 3H), 7.50 (d,  $J$  = 8.0 Hz, 2H);  $^{13}\text{C}\{^1\text{H}\}$ -NMR (101 MHz,  $\text{CDCl}_3$ , TMS)  $\delta_{\text{C}}$  21.4, 54.4, 117.8, 126.9, 127.7, 127.79, 127.83, 127.96, 128.04, 128.2, 129.3, 131.6, 132.2, 133.6, 135.0, 135.7, 136.9, 140.1, 143.4, 144.1, 144.8; IR (neat):  $\nu$  3028, 2973, 1596, 1493, 1342, 1154, 1088, 1027, 845, 813, 695  $\text{cm}^{-1}$ ; HRMS (ESI-TOF) Calcd for  $\text{C}_{28}\text{H}_{24}\text{NO}_2\text{NaSCl}$   $[\text{M}+\text{Na}]^+$ : 496.1109, found: 496.1117.

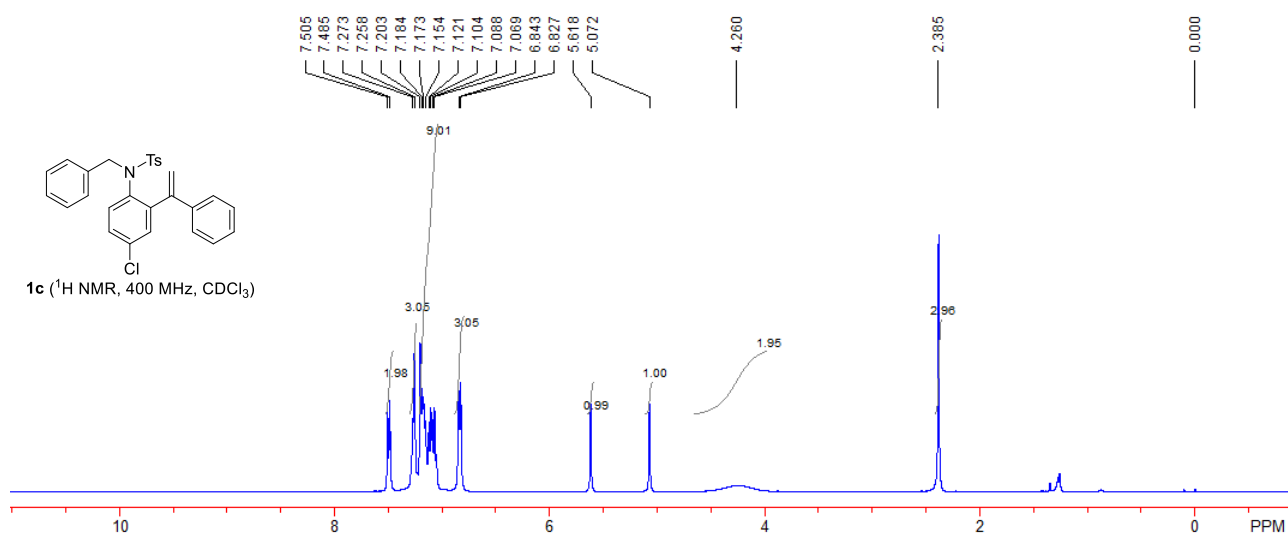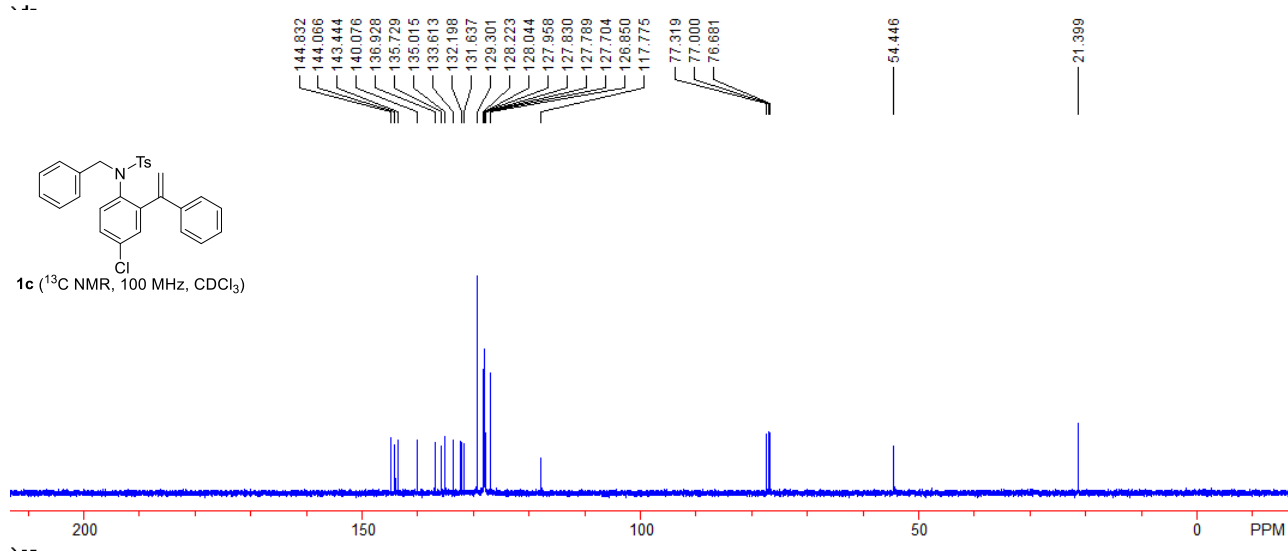

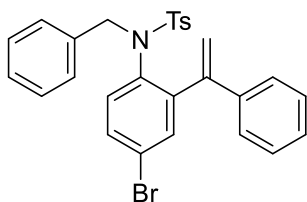

**Compound 1d:** Yield: 1506 mg, 85%; a yellow oil; Eluent: PE/EA = 10/1.  $^1\text{H}$  NMR (400 MHz,  $\text{CDCl}_3$ , TMS)  $\delta$  2.35 (s, 3H), 4.00-4.60 (m, 2H), 5.07 (s, 1H), 5.61 (s, 1H), 6.79 (d,  $J = 8.8$  Hz, 1H), 6.83 (d,  $J = 6.8$  Hz, 2H), 7.02-7.12 (m, 3H), 7.13-7.19 (m, 4H), 7.21-7.28 (m, 4H), 7.34-7.36 (m, 1H), 7.49 (d,  $J = 8.0$  Hz, 2H);  $^{13}\text{C}\{^1\text{H}\}$ -NMR (101 MHz,  $\text{CDCl}_3$ , TMS)  $\delta_{\text{C}}$  21.3, 54.3, 117.7, 121.7, 126.7, 127.6, 127.7, 127.8, 127.9, 128.1, 129.18, 129.22, 130.7, 132.4, 134.4, 134.9, 136.2, 136.8, 139.9, 143.3, 144.3, 144.6; IR (neat):  $\nu$  3059, 3029, 2922, 1596, 1493, 1343, 1154, 1089, 1027, 813, 694  $\text{cm}^{-1}$ ; HRMS (ESI-TOF) Calcd for  $\text{C}_{28}\text{H}_{24}\text{NO}_2\text{NaSBr}$   $[\text{M}+\text{Na}]^+$ : 540.0603, found: 540.0600.

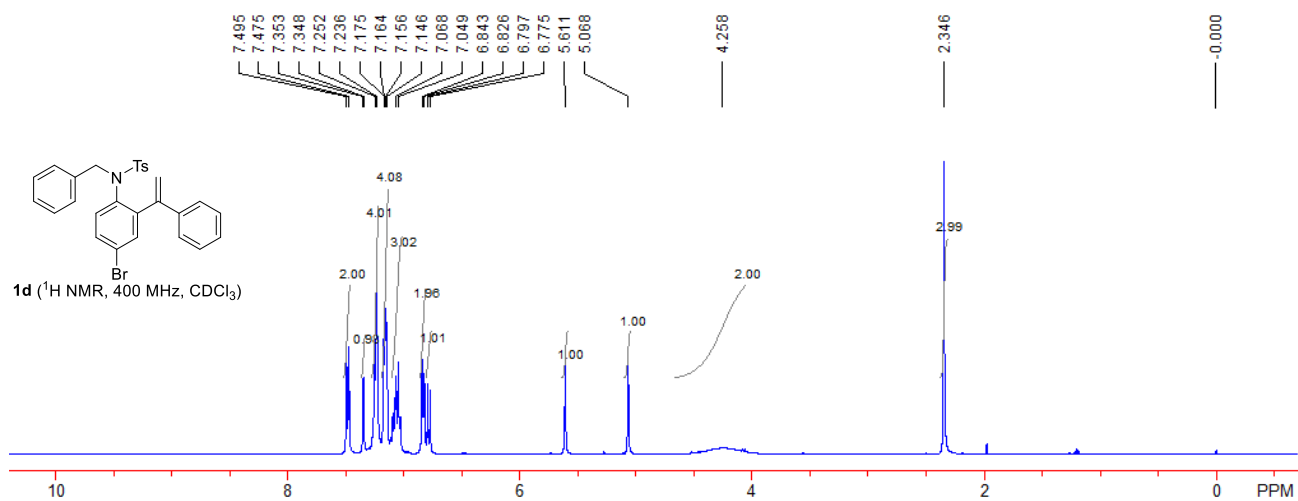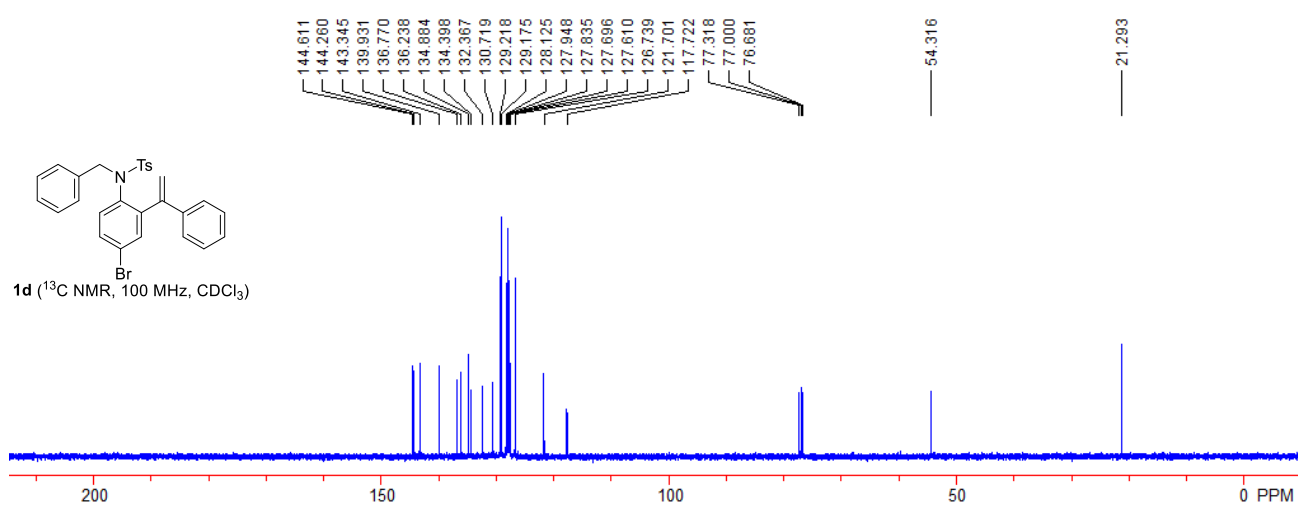

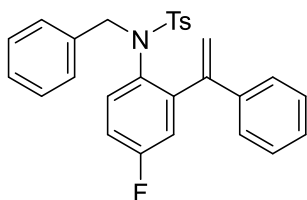

**Compound 1e:** Yield: 1581 mg, 93%; a yellow oil; Eluent: PE/EA = 10/1.  $^1\text{H}$  NMR (400 MHz,  $\text{CDCl}_3$ , TMS)  $\delta$  2.34 (s, 3H), 3.90-4.60 (m, 2H), 5.10 (s, 1H), 5.60 (s, 1H), 6.75-6.91 (m, 5H), 7.02-7.10 (m, 3H), 7.13-7.19 (m, 4H), 7.20-7.28 (m, 3H), 7.51 (d,  $J = 8.0$  Hz, 2H);  $^{13}\text{C}\{^1\text{H}\}$ -NMR (101 MHz,  $\text{CDCl}_3$ , TMS)  $\delta_{\text{C}}$  21.2, 54.5, 114.4 (d,  $J = 21.9$  Hz), 117.5, 118.3 (d,  $J = 22.1$  Hz), 126.8, 127.56, 127.62, 127.8, 127.9, 128.1, 129.17, 129.25, 132.5 (d,  $J = 9.0$  Hz), 133.0 (d,  $J = 2.9$  Hz), 135.0, 136.9, 140.1, 143.3, 144.6 (d,  $J = 8.3$  Hz), 144.8 (d,  $J = 0.9$  Hz), 161.2 (d,  $J = 247.8$  Hz);  $^{19}\text{F}$  NMR (376 MHz,  $\text{CDCl}_3$ )  $\delta$  -112.6; IR (neat):  $\nu$  3062, 3029, 2924, 1597, 1485, 1343, 1183, 1155, 1089, 939, 813, 698  $\text{cm}^{-1}$ ; HRMS (ESI-TOF) Calcd for  $\text{C}_{28}\text{H}_{24}\text{NO}_2\text{FNaS}$   $[\text{M}+\text{Na}]^+$ : 480.1404 found: 480.1404.

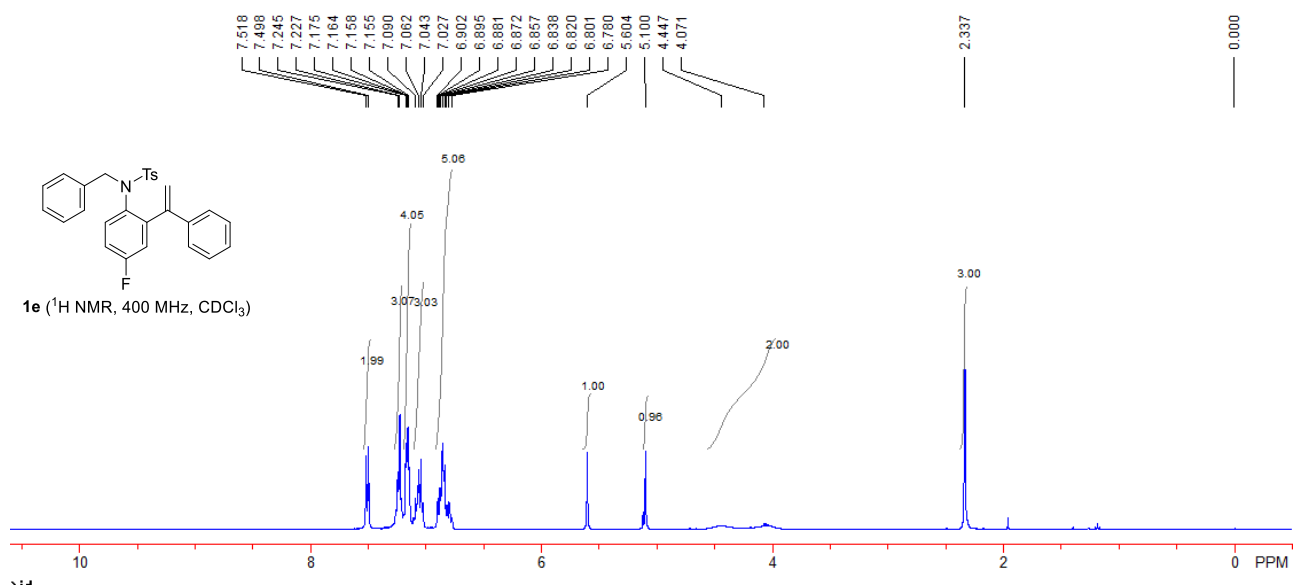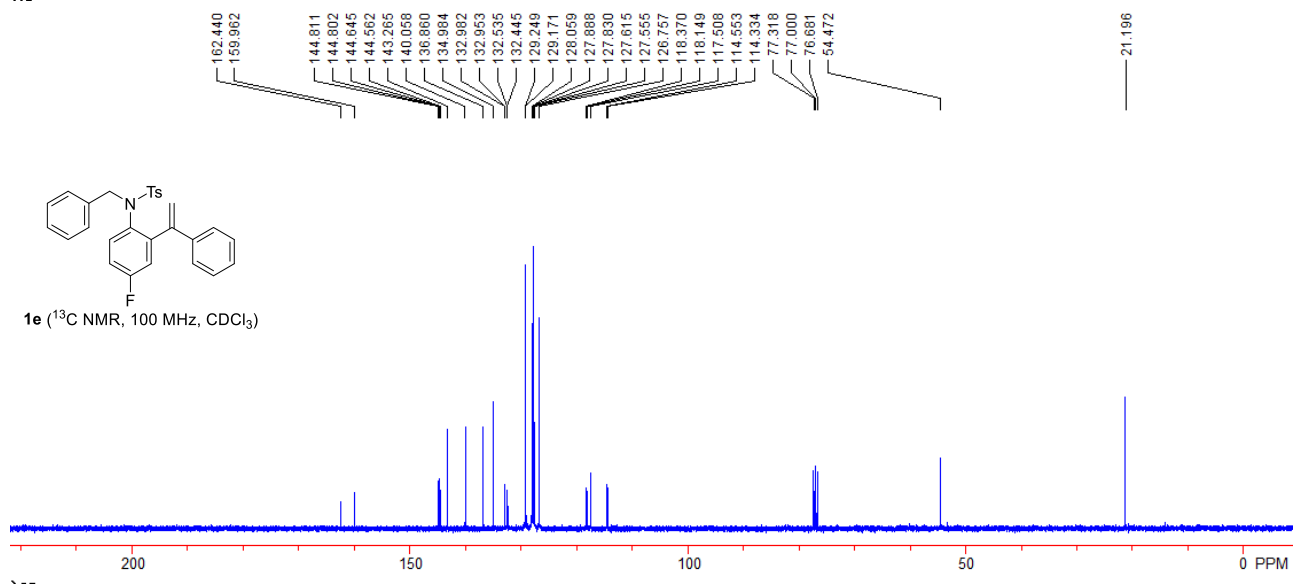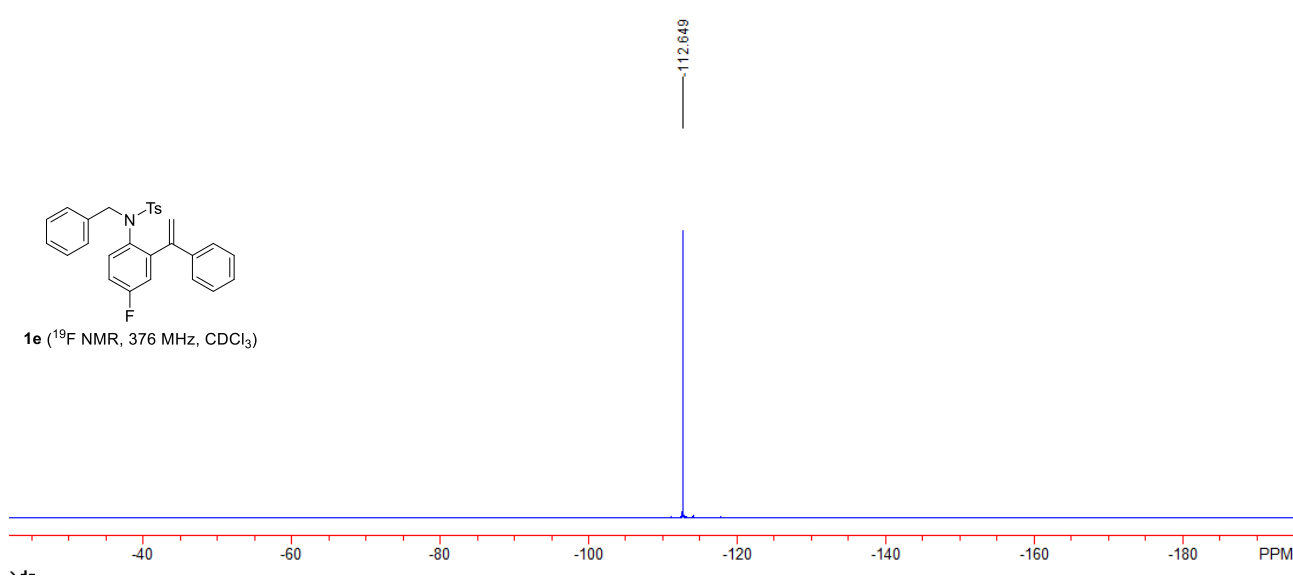

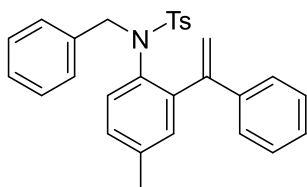

**Compound 1f:** Yield: 1668 mg, 90%; a yellow oil; Eluent: PE/EA = 10/1.  $^1\text{H}$  NMR (400 MHz,  $\text{CDCl}_3$ , TMS)  $\delta$  2.23 (s, 3H), 2.35 (s, 3H), 4.00-4.60 (m, 2H), 5.09 (s, 1H), 5.61 (s, 1H), 6.81 (d,  $J$  = 8.0 Hz, 1H), 6.86 (d,  $J$  = 8.8 Hz, 2H), 6.93 (d,  $J$  = 8.4 Hz, 1H), 6.97-7.00 (m, 1H), 7.01-7.10 (m, 3H), 7.12-7.26 (m, 7H), 7.51 (d,  $J$  = 7.6 Hz, 2H);  $^{13}\text{C}\{^1\text{H}\}$ -NMR (101 MHz,  $\text{CDCl}_3$ , TMS)  $\delta_{\text{C}}$  20.8, 21.3, 54.5, 116.8, 126.8, 127.37, 127.40, 127.82, 127.88, 128.0, 128.4, 129.1, 129.2, 130.4, 132.3, 134.4, 135.4, 137.3, 137.6, 140.8, 141.9, 143.0, 145.8; IR (neat):  $\nu$  3028, 2919, 2864, 1597, 1492, 1444, 1304, 1154, 1090, 906, 813, 698  $\text{cm}^{-1}$ ; HRMS (ESI-TOF) Calcd for  $\text{C}_{29}\text{H}_{27}\text{NO}_2\text{NaS}$   $[\text{M}+\text{Na}]^+$ : 476.1655, found: 476.1673.

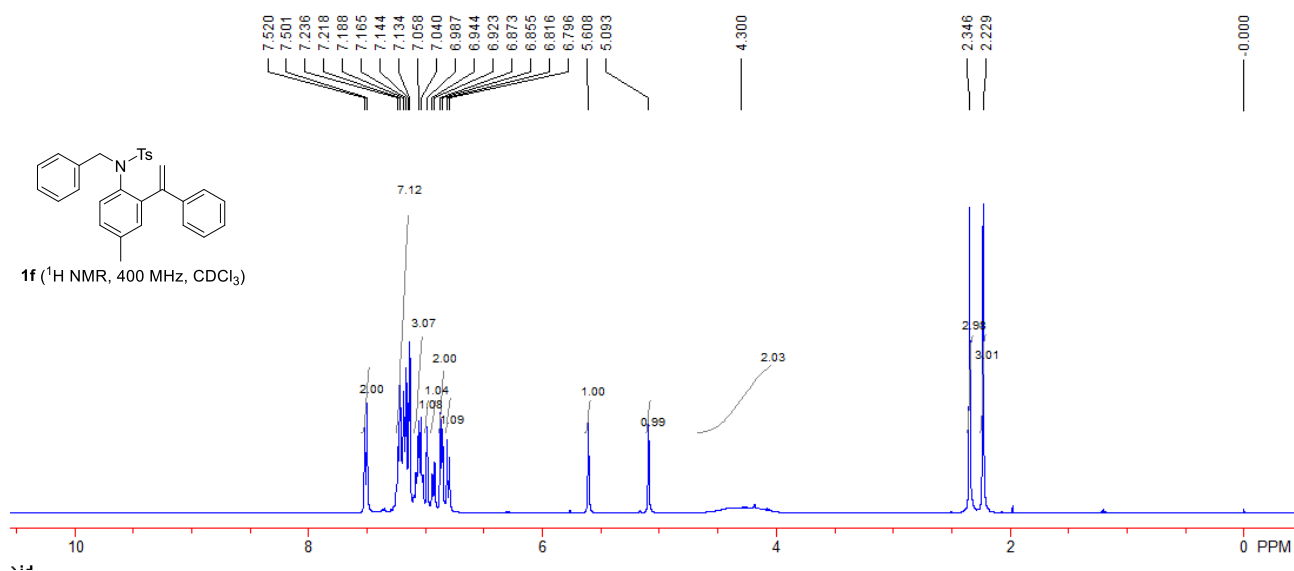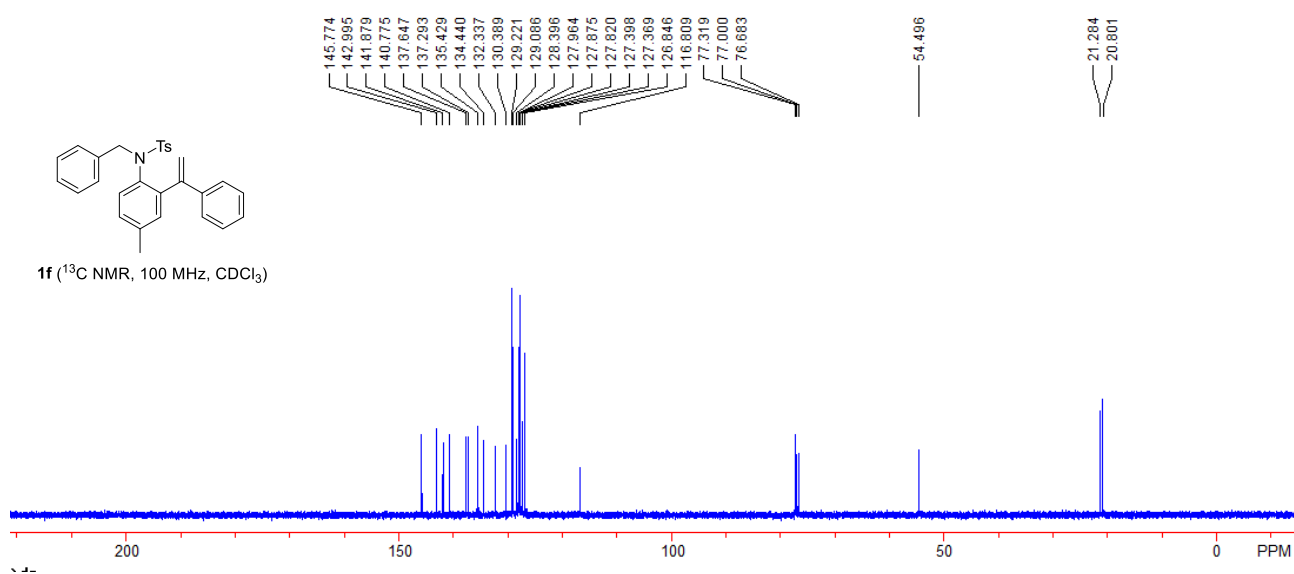

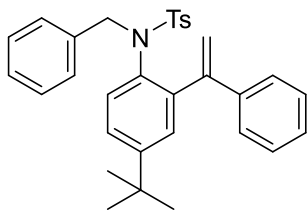

**Compound 1g:** Yield: 2142 mg, 88%; a yellow oil; Eluent: PE/EA = 10/1.  $^1\text{H}$  NMR (400 MHz,  $\text{CDCl}_3$ , TMS)  $\delta$  1.24 (s, 9H), 2.32 (s, 3H), 4.00-4.60 (m, 2H), 5.15 (s, 1H), 5.66 (s, 1H), 6.84-6.94 (m, 3H), 6.99-7.08 (m, 3H), 7.12 (d,  $J$  = 8.0 Hz, 2H), 7.15-7.26 (m, 7H), 7.48 (d,  $J$  = 8.0 Hz, 2H);  $^{13}\text{C}\{^1\text{H}\}$ -NMR (101 MHz,  $\text{CDCl}_3$ , TMS)  $\delta_{\text{C}}$  21.2, 30.9, 34.2, 54.6, 116.6, 124.5, 126.7, 127.26, 127.32, 127.7, 127.8, 127.9, 128.8, 128.97, 129.04, 130.0, 134.6, 135.5, 137.4, 140.6, 141.3, 142.8, 146.1, 150.5; IR (neat):  $\nu$  3029, 2960, 2867, 1597, 1493, 1454, 1343, 1155, 1090, 913, 853, 697  $\text{cm}^{-1}$ ; HRMS (ESI-TOF) Calcd for  $\text{C}_{32}\text{H}_{33}\text{NO}_2\text{NaS}$   $[\text{M}+\text{Na}]^+$ : 518.2124, found: 518.2120.

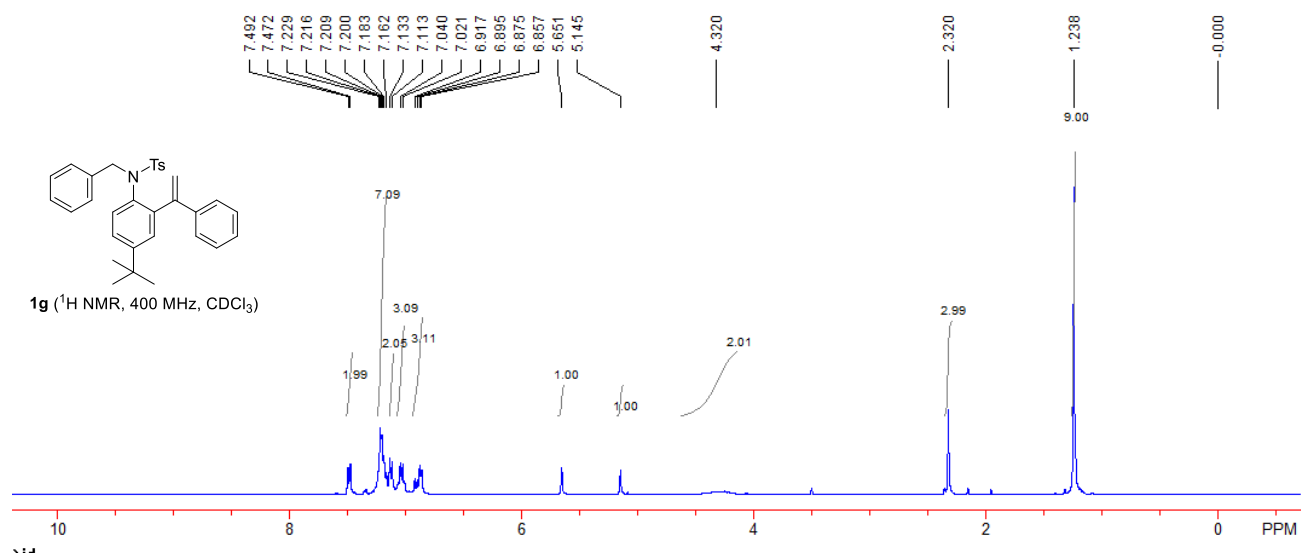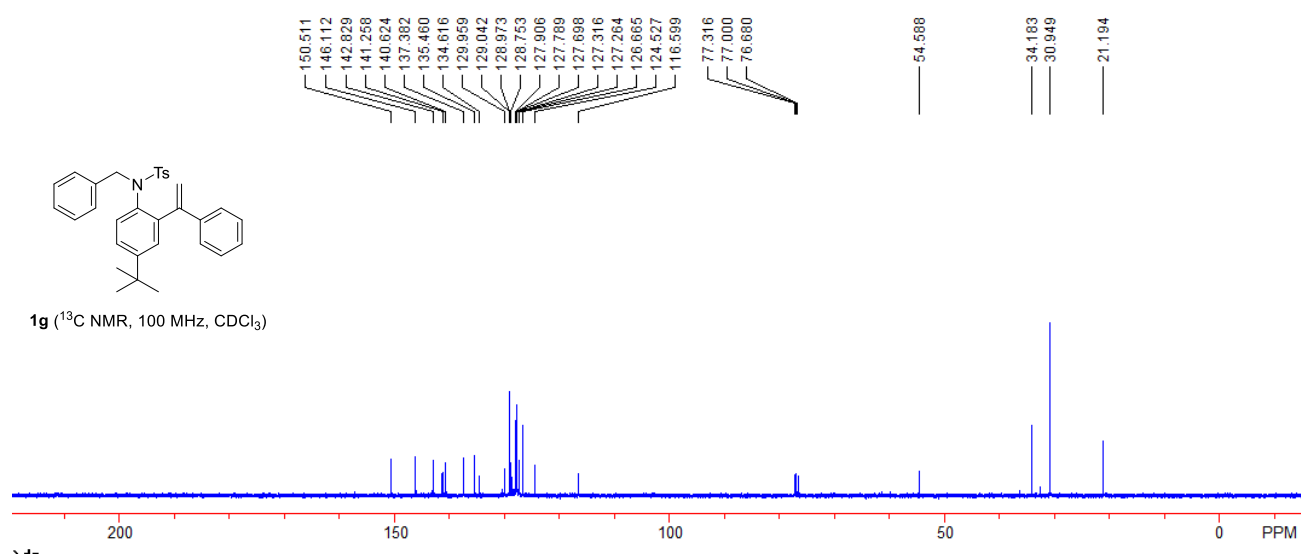

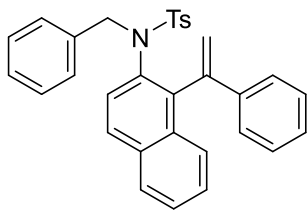

**Compound 1h:** Yield: 1866 mg, 79% as a pair of rotamers with 1:1 ratio because it has two rotation axes; a dark yellow solid; Mp: 144-146 °C; Eluent: PE/EA = 10/1.  $^1\text{H}$  NMR (400 MHz,  $\text{CDCl}_3$ , TMS)  $\delta$  2.35 (s, 6H), 3.76-4.60 (m, 1.5H), 4.71 (s, 1H), 4.74 (s, 1H), 5.14-5.30 (m, 1.5H), 6.00-6.16 (m, 2H), 6.66-6.86 (m, 3H), 6.94-7.27 (m, 24H), 7.31 (t,  $J = 7.6$  Hz, 3H), 7.40 (t,  $J = 7.2$  Hz, 3H), 7.57-7.67 (m, 4H), 7.75 (d,  $J = 8.0$  Hz, 2H), 7.85 (d,  $J = 8.4$  Hz, 2H);  $^{13}\text{C}\{^1\text{H}\}$ -NMR (101 MHz,  $\text{CDCl}_3$ , TMS)  $\delta_{\text{C}}$  21.4, 53.9, 119.0, 126.25, 126.28, 126.4, 127.0, 127.47, 127.59, 127.61, 127.7, 127.8, 127.9, 128.3, 128.6, 129.2, 129.7, 129.9, 130.6, 132.7, 133.3, 134.3, 135.5, 139.7, 143.1; IR (neat):  $\nu$  3061, 3029, 2931, 1596, 1493, 1359, 1279, 1217, 1150, 1066, 960, 817, 698  $\text{cm}^{-1}$ ; HRMS (ESI-TOF) Calcd for  $\text{C}_{32}\text{H}_{27}\text{NO}_2\text{NaS}$   $[\text{M}+\text{Na}]^+$ : 512.1655, found: 512.1660.

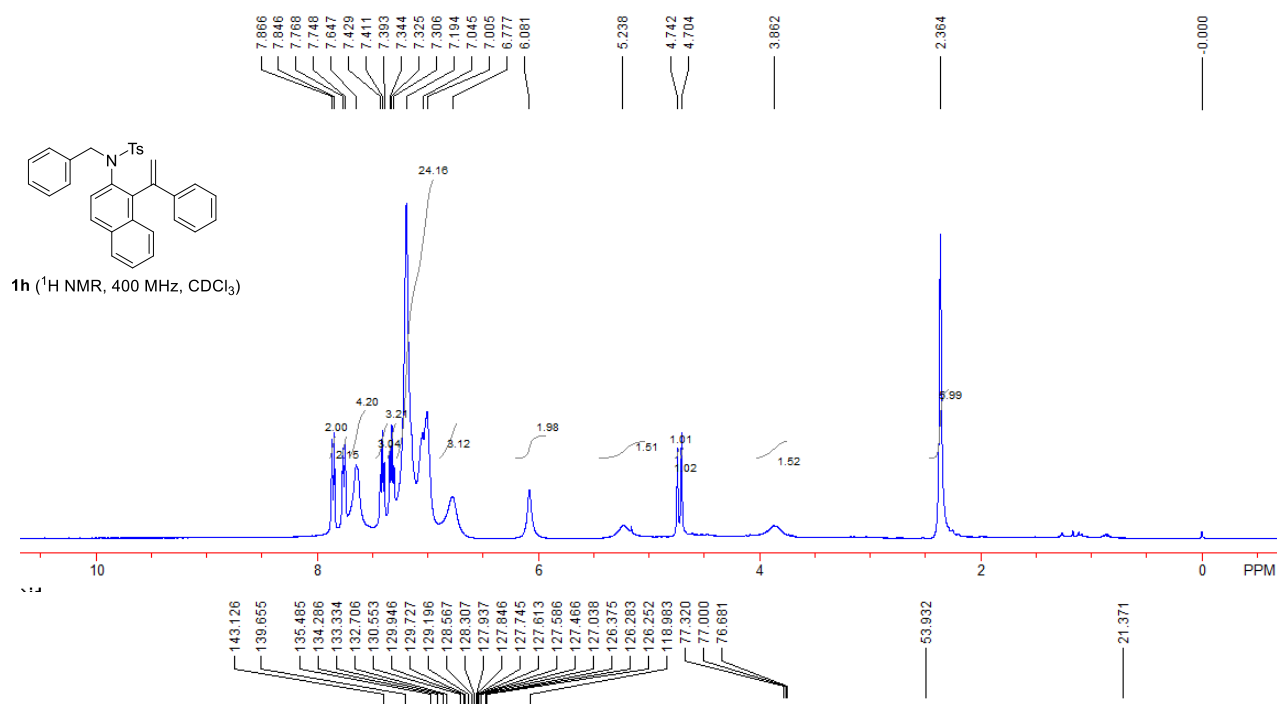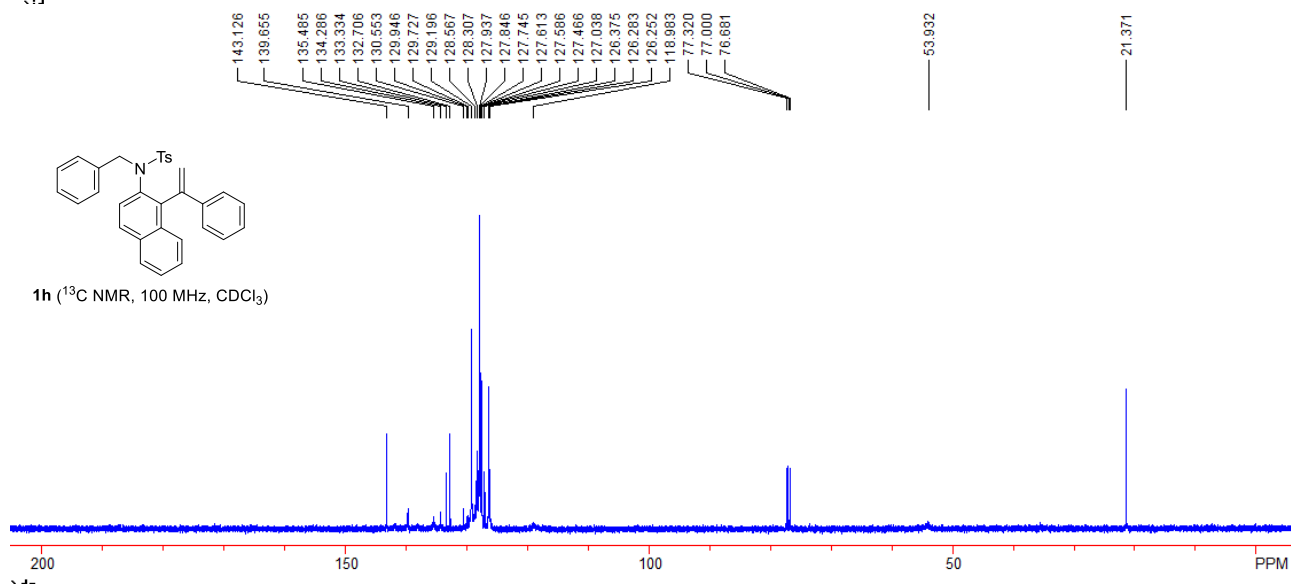

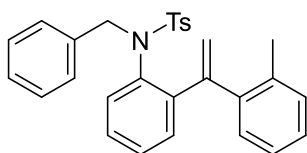

**Compound 1i:** Yield: 1226 mg, 81%; a light yellow solid; Mp: 96-98 °C; Eluent: PE/EA = 10/1.  $^1\text{H}$  NMR (400 MHz,  $\text{CDCl}_3$ , TMS)  $\delta$  2.13 (s, 3H), 2.38 (s, 3H), 3.50-3.67 (m, 1H), 4.37-4.50 (m, 1H), 5.30 (s, 1H), 5.49 (s, 1H), 6.51 (d,  $J = 7.6$  Hz, 1H), 6.82 (d,  $J = 7.6$  Hz, 2H), 6.99-7.19 (m, 10H), 7.23 (t,  $J = 7.6$  Hz, 1H), 7.32 (d,  $J = 7.6$  Hz, 1H), 7.45 (d,  $J = 7.6$  Hz, 2H);  $^{13}\text{C}\{^1\text{H}\}$ -NMR (101 MHz,  $\text{CDCl}_3$ , TMS)  $\delta_{\text{C}}$  20.7, 21.2, 54.0, 120.7, 125.5, 127.16, 127.24, 127.5, 127.8, 128.0, 128.2, 129.0, 129.78, 129.84, 130.2, 130.9, 132.0, 135.2, 135.5, 136.3, 136.9, 141.5, 143.0, 143.6, 147.6; IR (neat):  $\nu$  3063, 3031, 1597, 1485, 1369, 1155, 1032, 949, 823, 771, 699  $\text{cm}^{-1}$ ; HRMS (ESI-TOF) Calcd for  $\text{C}_{29}\text{H}_{27}\text{NO}_2\text{NaS}$   $[\text{M}+\text{Na}]^+$ : 476.1655, found: 476.1658.

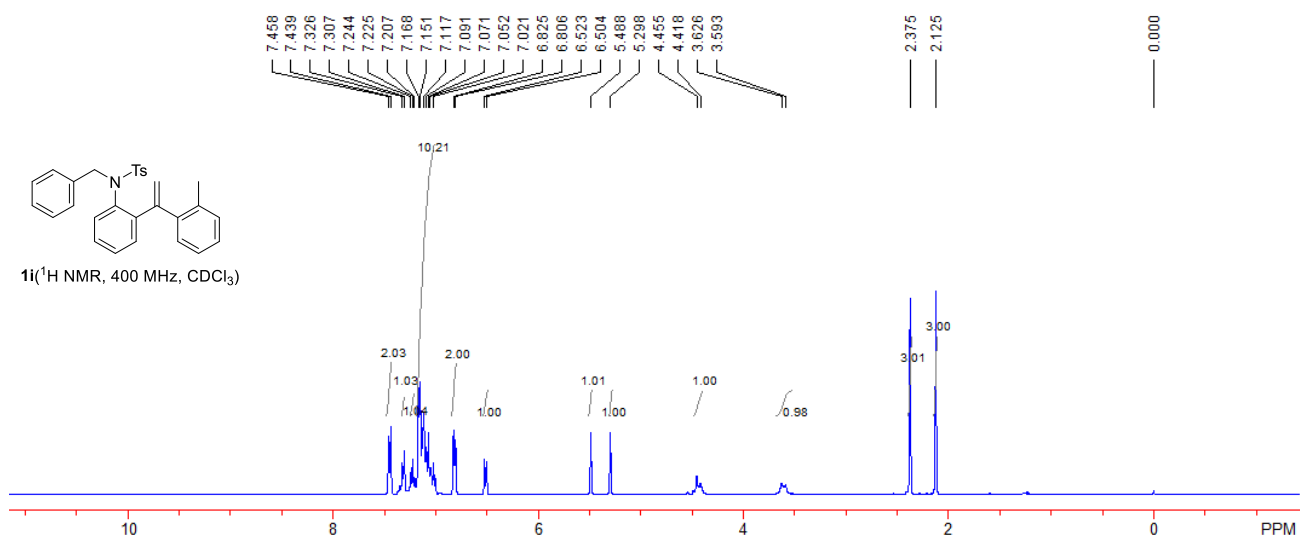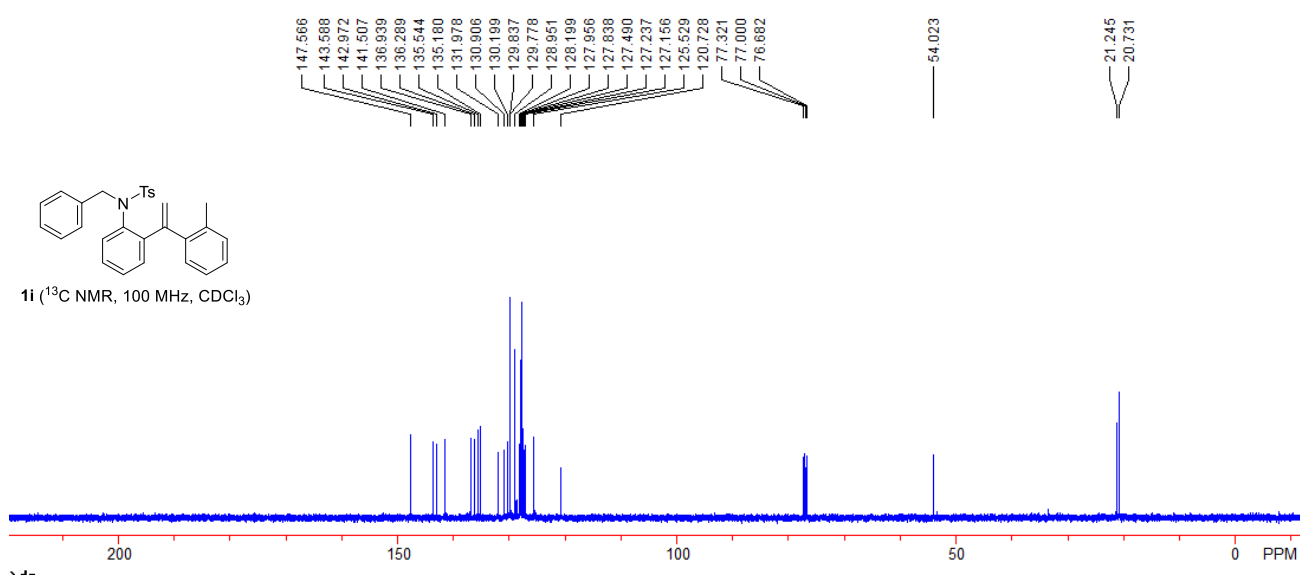

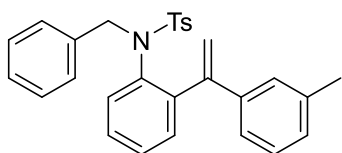

**Compound 1j:** Yield: 1546 mg, 69%; a yellow oil; Eluent: PE/EA = 10/1.  $^1\text{H}$  NMR (400 MHz,  $\text{CDCl}_3$ , TMS)  $\delta$  2.27 (s, 3H), 2.40 (s, 3H), 4.00-4.60 (m, 2H), 5.10 (s, 1H), 5.63 (s, 1H), 6.85 (d,  $J$  = 7.6 Hz, 2H), 6.92-6.97 (m, 2H), 6.99 (d,  $J$  = 7.6 Hz, 1H), 7.04-7.27 (m, 10H), 7.51 (d,  $J$  = 7.2 Hz, 2H);  $^{13}\text{C}\{^1\text{H}\}$ -NMR (101 MHz,  $\text{CDCl}_3$ , TMS)  $\delta_{\text{C}}$  21.38, 21.44, 54.5, 117.0, 124.1, 127.5, 127.67, 127.72, 127.89, 127.93, 128.0, 128.4, 129.2, 129.3, 131.0, 132.0, 135.5, 137.1, 137.5, 137.6, 140.7, 142.3, 143.2, 146.0; IR (neat):  $\nu$  3029, 2920, 1597, 1485, 1445, 1400, 1341, 1304, 1155, 1040, 908, 767, 698  $\text{cm}^{-1}$ ; HRMS (ESI-TOF) Calcd for  $\text{C}_{29}\text{H}_{27}\text{NO}_2\text{NaS}$   $[\text{M}+\text{Na}]^+$ : 476.1655, found: 476.1646.

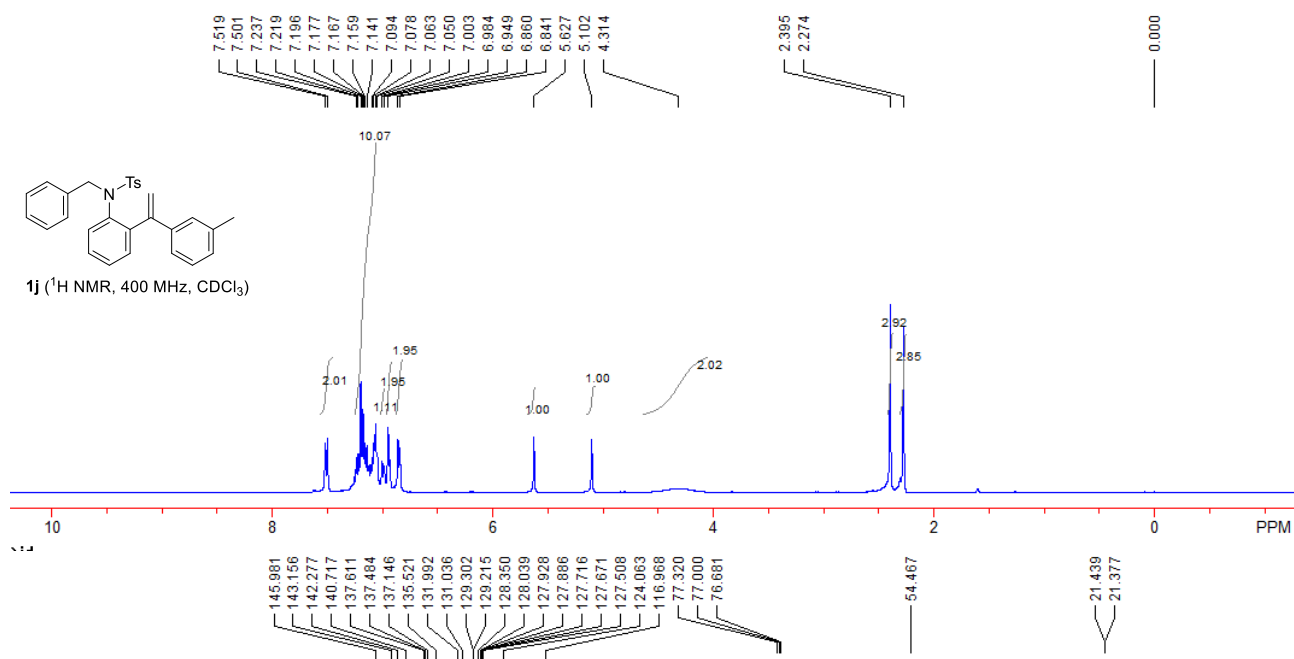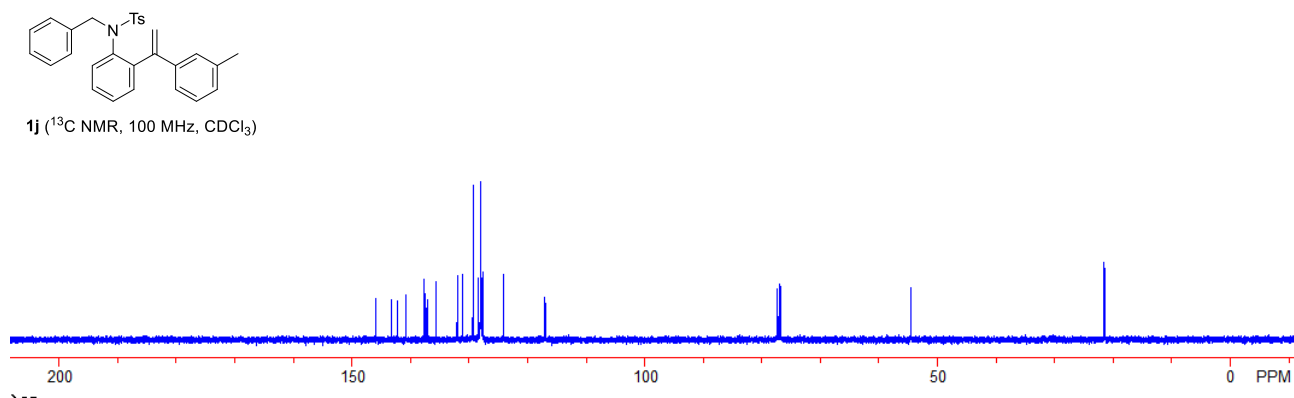

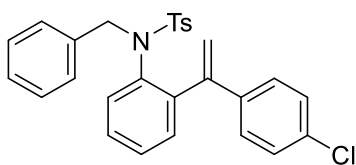

**Compound 1k:** Yield: 1920 mg, 80%; a light yellow solid; Mp: 113-115 °C; Eluent: PE/EA = 10/1.

$^1\text{H}$  NMR (400 MHz,  $\text{CDCl}_3$ , TMS)  $\delta$  2.38 (s, 3H), 4.00-4.60 (m, 2H), 5.13 (s, 1H), 5.62 (s, 1H), 6.86 (d,  $J = 7.2$  Hz, 2H), 6.95 (d,  $J = 7.2$  Hz, 1H), 7.02-7.12 (m, 5H), 7.12-7.24 (m, 7H), 7.51 (d,  $J = 8.0$  Hz, 2H);  $^{13}\text{C}\{^1\text{H}\}$ -NMR (101 MHz,  $\text{CDCl}_3$ , TMS)  $\delta_{\text{C}}$  21.4, 55.0, 117.7, 127.6, 127.92, 127.93, 127.98, 128.0, 128.15, 128.23, 129.3, 130.0, 131.8, 133.1, 135.0, 136.6, 137.4, 139.3, 141.9, 143.3, 144.6; IR (neat):  $\nu$  3066, 3029, 2902, 1593, 1455, 1395, 1309, 1258, 1148, 1066, 1016, 957, 877, 775  $\text{cm}^{-1}$ ; HRMS (ESI-TOF) Calcd for  $\text{C}_{28}\text{H}_{24}\text{NO}_2\text{NaSCl}$   $[\text{M}+\text{Na}]^+$ : 496.1109, found: 496.1114.

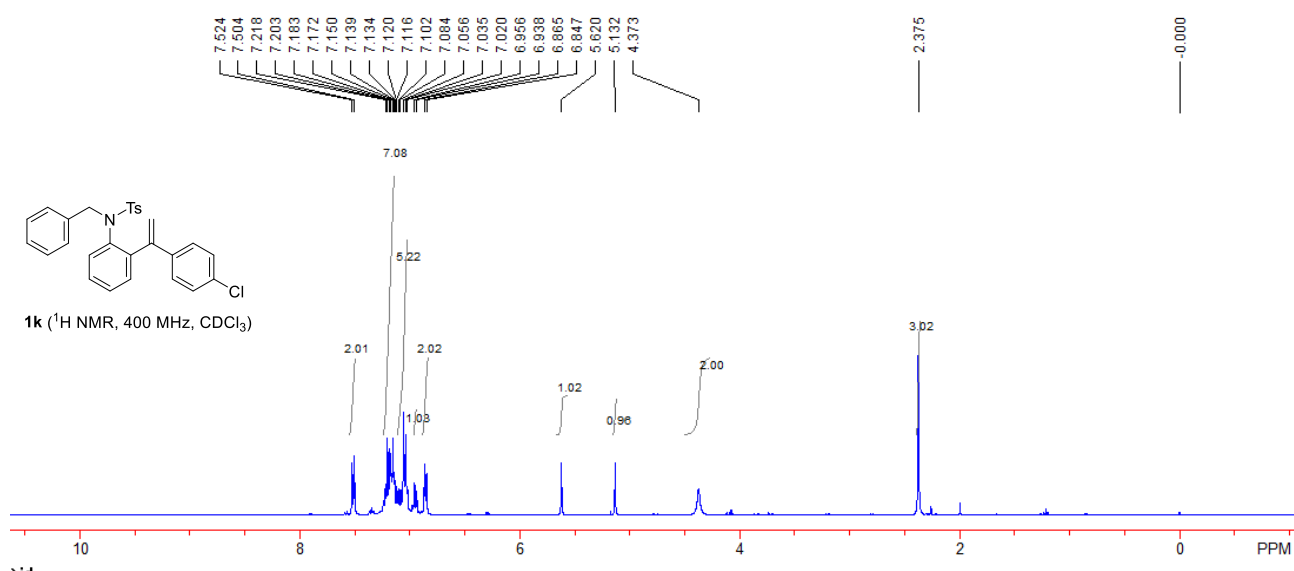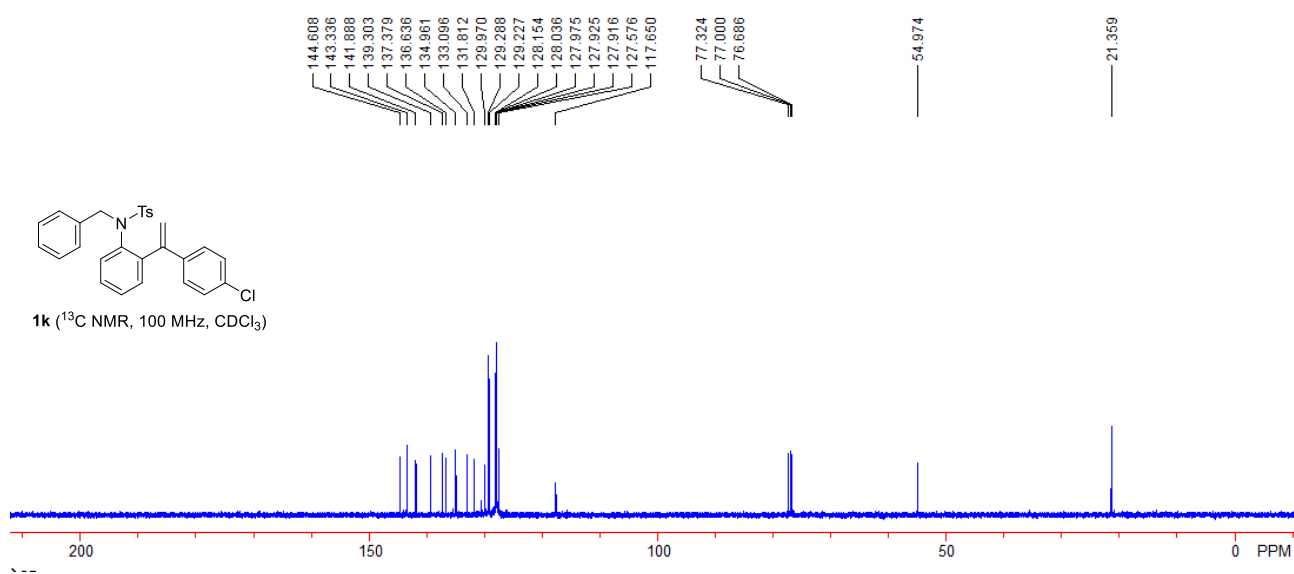

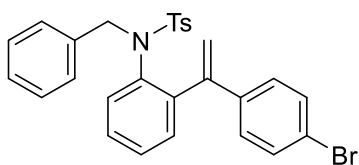

**Compound 1l:** Yield: 2214 mg, 85%; a light yellow solid; Mp: 108-110 °C; Eluent: PE/EA = 10/1.  $^1\text{H}$  NMR (400 MHz,  $\text{CDCl}_3$ , TMS)  $\delta$  2.39 (s, 3H), 4.00-4.60 (m, 2H), 5.14 (s, 1H), 5.63 (s, 1H), 6.85 (d,  $J = 7.2$  Hz, 2H), 6.92-7.02 (m, 3H), 7.04 (t,  $J = 7.6$  Hz, 2H), 7.08-7.26 (m, 6H), 7.32 (d,  $J = 8.4$  Hz, 2H), 7.51 (d,  $J = 8.0$  Hz, 2H);  $^{13}\text{C}\{^1\text{H}\}$ -NMR (101 MHz,  $\text{CDCl}_3$ , TMS)  $\delta_{\text{C}}$  21.4, 55.0, 117.8, 121.4, 127.6, 127.93, 127.96, 128.02, 128.5, 129.26, 129.33, 130.0, 131.0, 131.9, 135.0, 136.6, 137.4, 139.8, 141.8, 143.4, 144.7; IR (neat):  $\nu$  2987, 2901, 1593, 1454, 1365, 1290, 1149, 1112, 1076, 1030, 927, 876, 774, 702  $\text{cm}^{-1}$ ; HRMS (ESI-TOF) Calcd for  $\text{C}_{28}\text{H}_{24}\text{NO}_2\text{NaSBr}$   $[\text{M}+\text{Na}]^+$ : 540.0603, found: 540.0609.

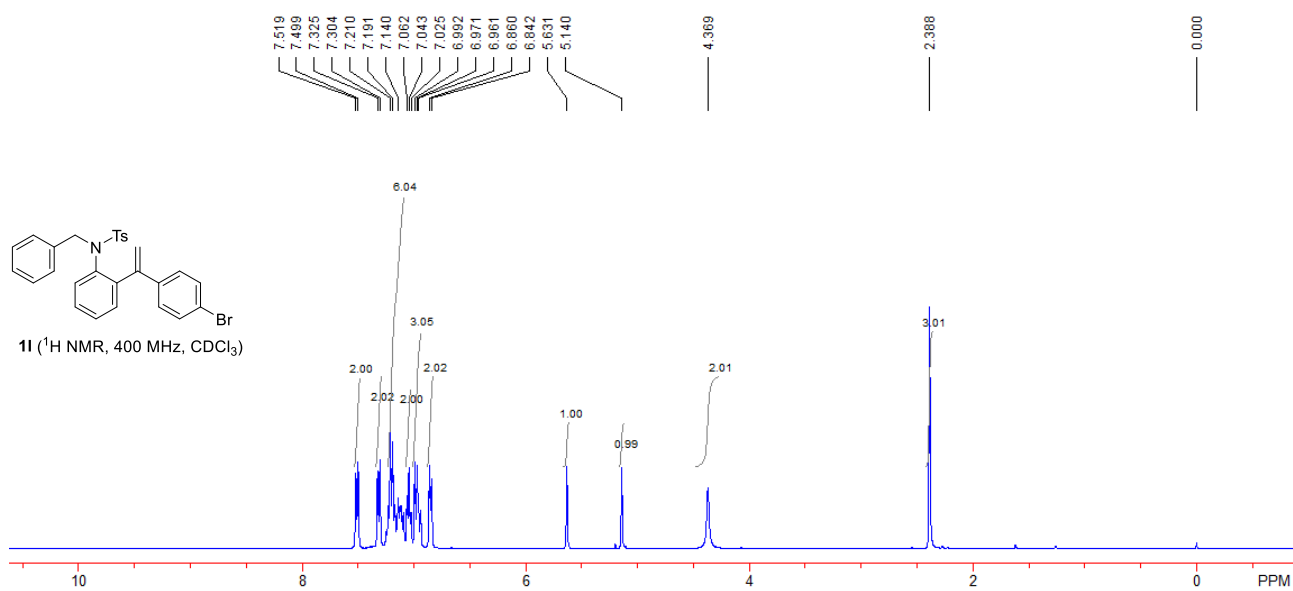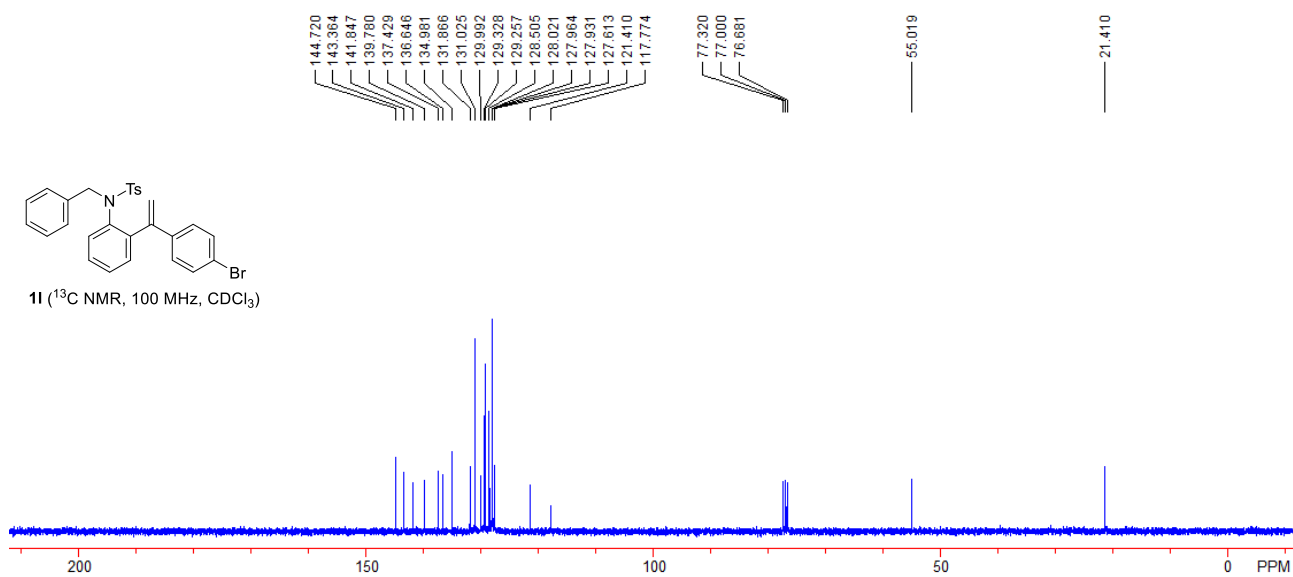

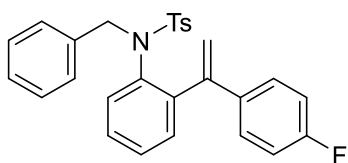

**Compound 1m:** Yield: 1628 mg, 93%; a light yellow solid; Mp: 104-106 °C; Eluent: PE/EA = 10/1.

$^1\text{H}$  NMR (400 MHz,  $\text{CDCl}_3$ , TMS)  $\delta$  2.39 (s, 3H), 4.20-4.60 (m, 2H), 5.09 (s, 1H), 5.58 (s, 1H), 6.84-6.96 (m, 5H), 7.02-7.26 (m, 10H), 7.53 (d,  $J$  = 8.0 Hz, 2H);  $^{13}\text{C}\{^1\text{H}\}$ -NMR (101 MHz,  $\text{CDCl}_3$ , TMS)  $\delta_{\text{C}}$  21.4, 54.9, 114.8 (d,  $J$  = 21.6 Hz), 117.0, 127.6, 127.88, 127.95, 127.98, 128.02, 128.6 (d,  $J$  = 7.5 Hz), 129.27, 129.34, 130.2, 131.9, 135.1, 136.9, 137.0 (d,  $J$  = 3.3 Hz), 137.4, 142.2, 143.4, 144.8, 162.2 (d,  $J$  = 243.7 Hz);  $^{19}\text{F}$  NMR (376 MHz,  $\text{CDCl}_3$ )  $\delta$  -114.7; IR (neat):  $\nu$  2986, 2903, 1597, 1485, 1400, 1337, 1289, 1154, 1086, 1030, 953, 924, 868, 775, 705  $\text{cm}^{-1}$ ; HRMS (ESI-TOF) Calcd for  $\text{C}_{28}\text{H}_{24}\text{NO}_2\text{FNaS}$   $[\text{M}+\text{Na}]^+$ : 480.1404, found: 480.1410.

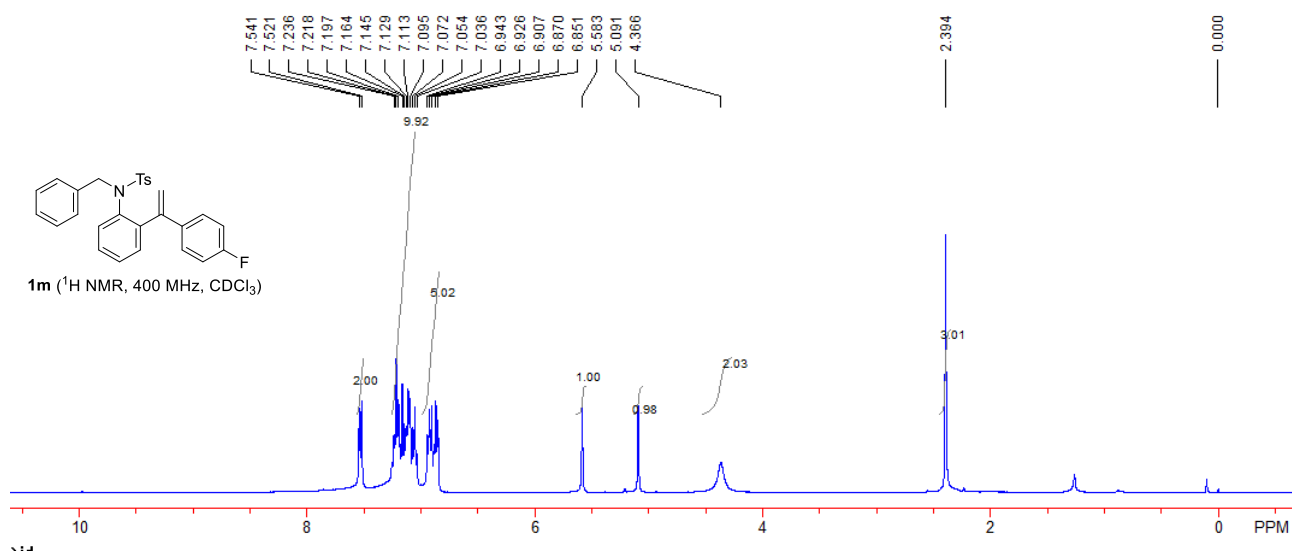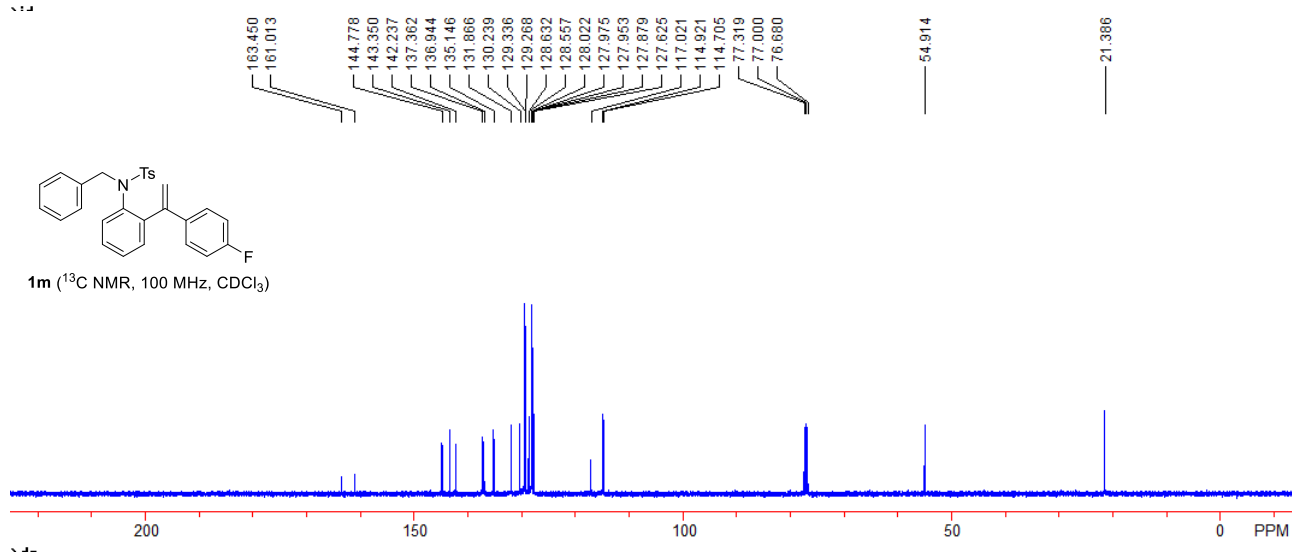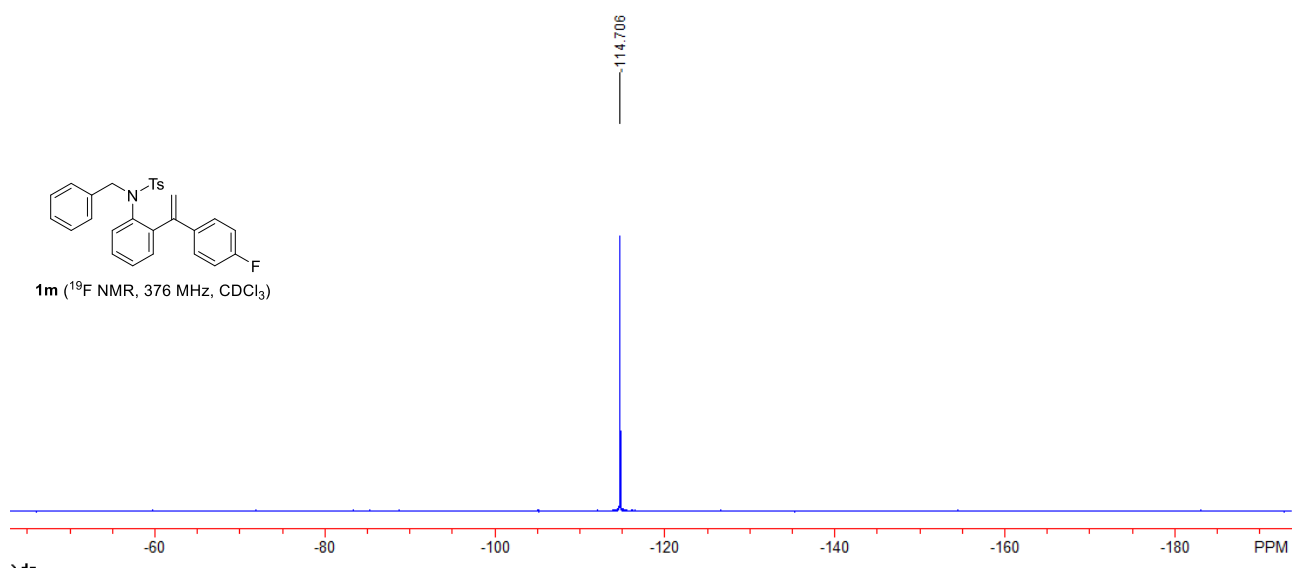

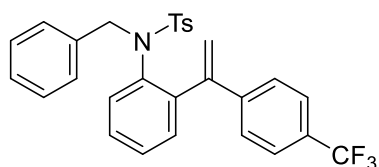

**Compound 1n:** Yield: 1338 mg, 91%; a yellow oil; Eluent: PE/EA = 10/1.  $^1\text{H}$  NMR (400 MHz,  $\text{CDCl}_3$ , TMS)  $\delta$  2.35 (s, 3H), 4.35-4.45 (m, 2H), 5.25 (s, 1H), 5.72 (s, 1H), 6.85 (d,  $J = 7.2$  Hz, 2H), 6.95-7.04 (m, 3H), 7.05-7.14 (m, 2H), 7.16-7.26 (m, 6H), 7.43 (d,  $J = 8.0$  Hz, 2H), 7.52 (d,  $J = 8.0$  Hz, 2H);  $^{13}\text{C}\{^1\text{H}\}$ -NMR (101 MHz,  $\text{CDCl}_3$ , TMS)  $\delta_{\text{C}}$  21.2, 55.3, 119.3, 124.1 (q,  $J = 270.3$  Hz), 124.8 (q,  $J = 3.8$  Hz), 127.1, 127.7, 127.91, 127.97, 128.03, 128.1, 128.9 (q,  $J = 32.0$  Hz), 129.2, 129.3, 129.5, 131.8, 134.8, 136.3, 137.6, 141.7, 143.5, 144.4 (q,  $J = 1.2$  Hz), 144.5;  $^{19}\text{F}$  NMR (376 MHz,  $\text{CDCl}_3$ )  $\delta$  -62.1; IR (neat):  $\nu$  3030, 2924, 1615, 1597, 1487, 1321, 1157, 1114, 1063, 913, 849, 726, 698  $\text{cm}^{-1}$ ; HRMS (ESI-TOF) Calcd for  $\text{C}_{29}\text{H}_{24}\text{NO}_2\text{F}_3\text{NaS}$   $[\text{M}+\text{Na}]^+$ : 530.1372, found: 530.1366.

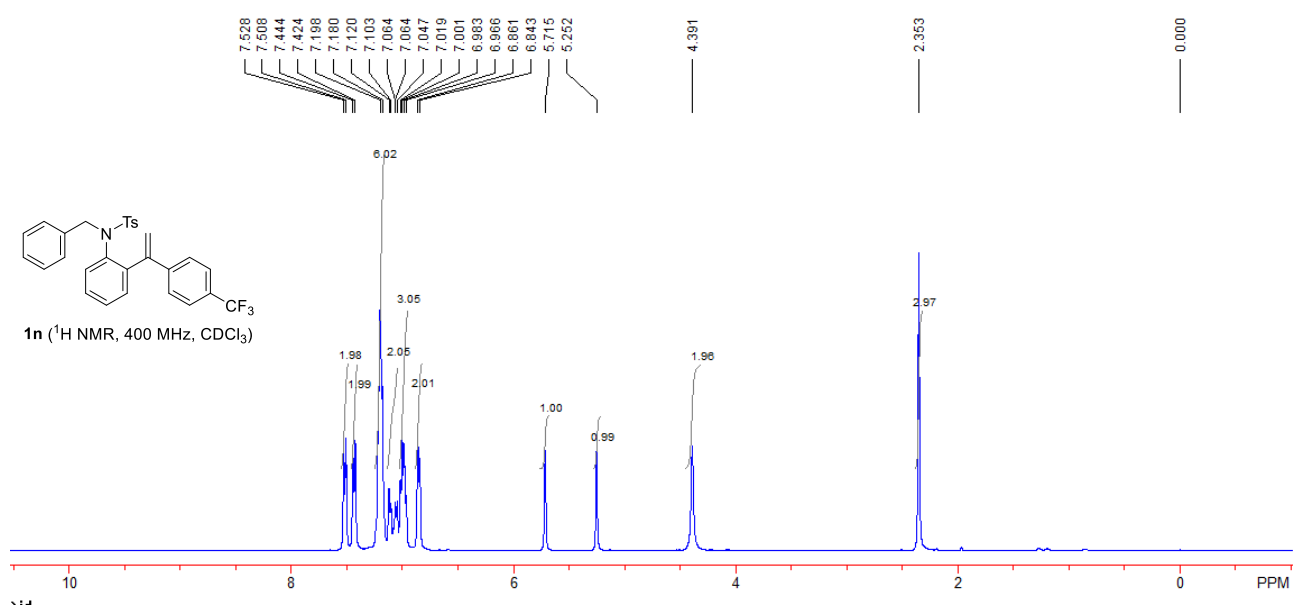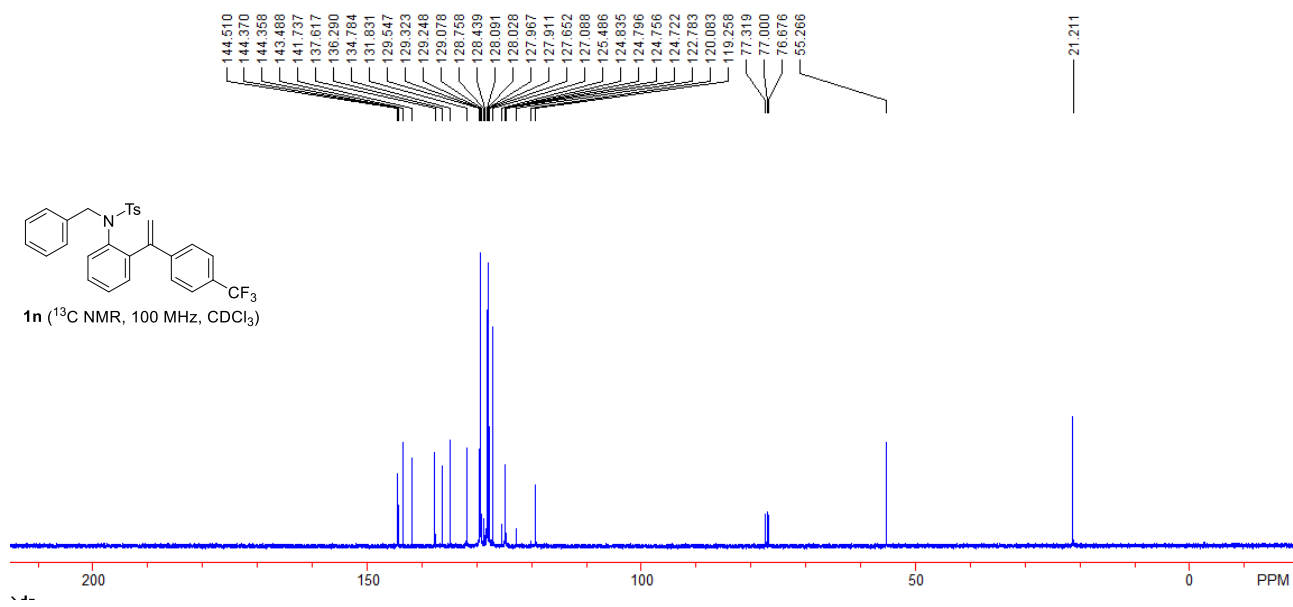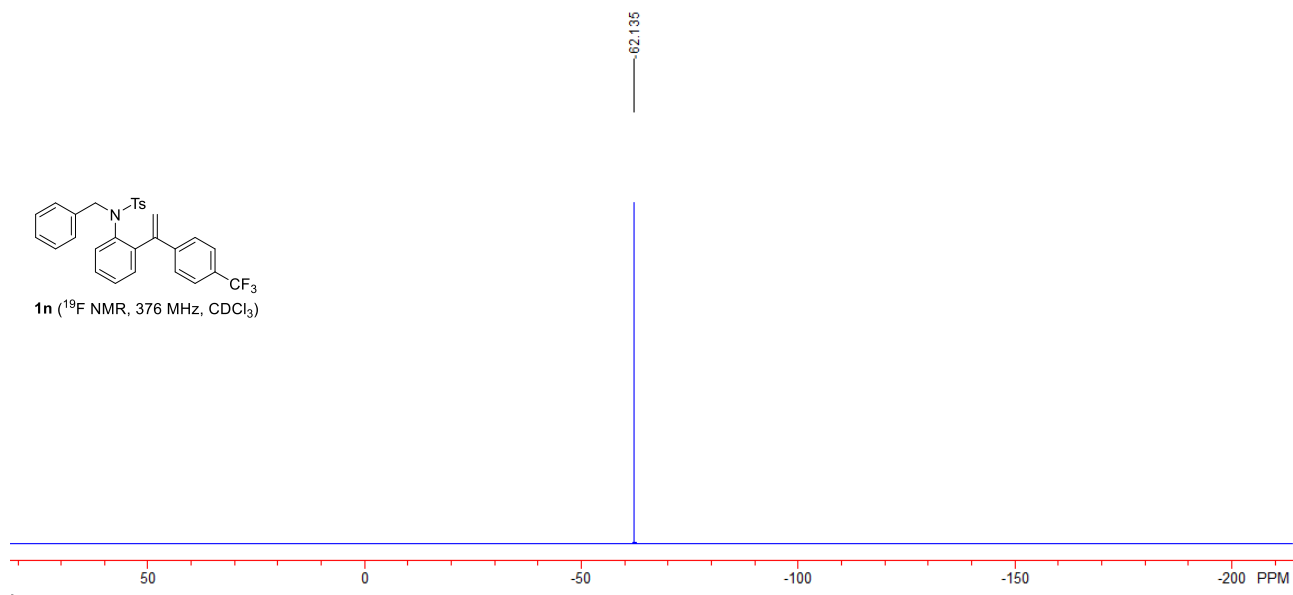

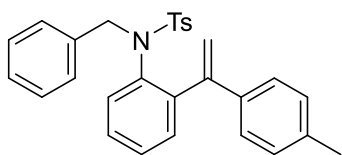

**Compound 1o:** Yield: 1642 mg, 80%; a light yellow solid; Mp: 102-104 °C; PE/EA = 10/1.  $^1\text{H}$  NMR (400 MHz,  $\text{CDCl}_3$ , TMS)  $\delta$  2.30 (s, 3H), 2.36 (s, 3H), 4.00-4.60 (m, 2H), 5.05 (s, 1H), 5.61 (s, 1H), 6.87 (d,  $J$  = 6.8 Hz, 2H), 6.95 (d,  $J$  = 8.0 Hz, 1H), 7.02-7.24 (m, 12H), 7.50 (d,  $J$  = 8.4 Hz, 2H);  $^{13}\text{C}\{^1\text{H}\}$ -NMR (101 MHz,  $\text{CDCl}_3$ , TMS)  $\delta_{\text{C}}$  21.0, 21.3, 54.5, 116.1, 126.7, 127.4, 127.6, 127.78, 127.87, 127.95, 128.7, 129.1, 129.3, 130.8, 131.9, 135.5, 137.20, 137.24, 137.3, 137.9, 142.3, 143.1, 145.6; IR (neat):  $\nu$  3064, 3011, 2984, 2920, 1597, 1486, 1442, 1369, 1272, 1210, 1198, 1159, 991, 880, 771, 726, 700  $\text{cm}^{-1}$ ; HRMS (ESI-TOF) Calcd for  $\text{C}_{29}\text{H}_{27}\text{NO}_2\text{NaS}$   $[\text{M}+\text{Na}]^+$ : 476.1655, found: 476.1662.

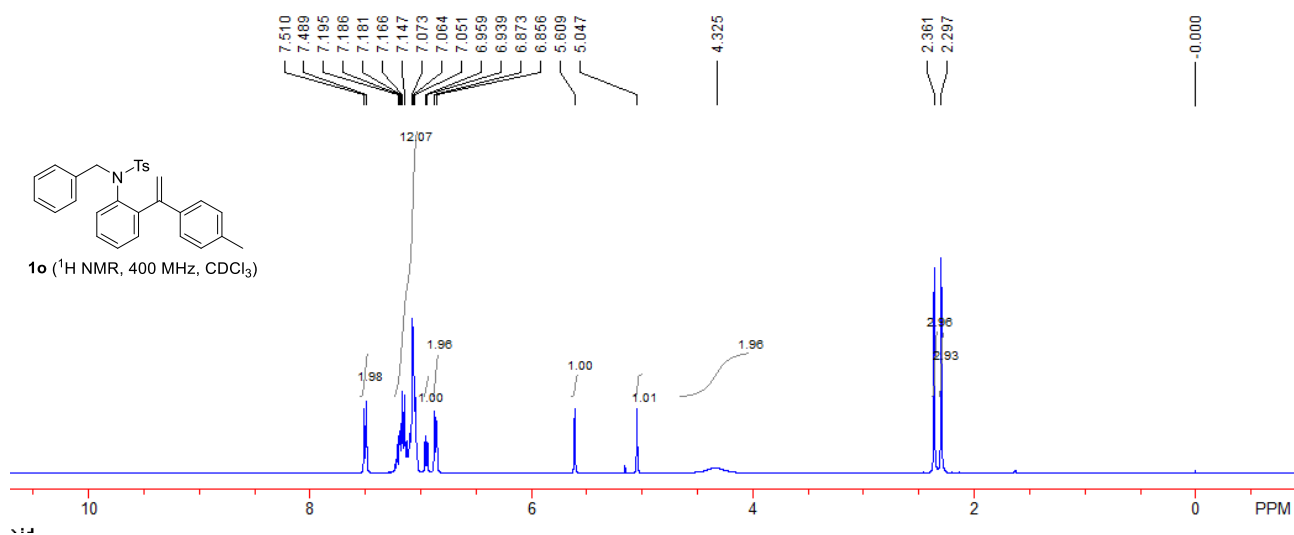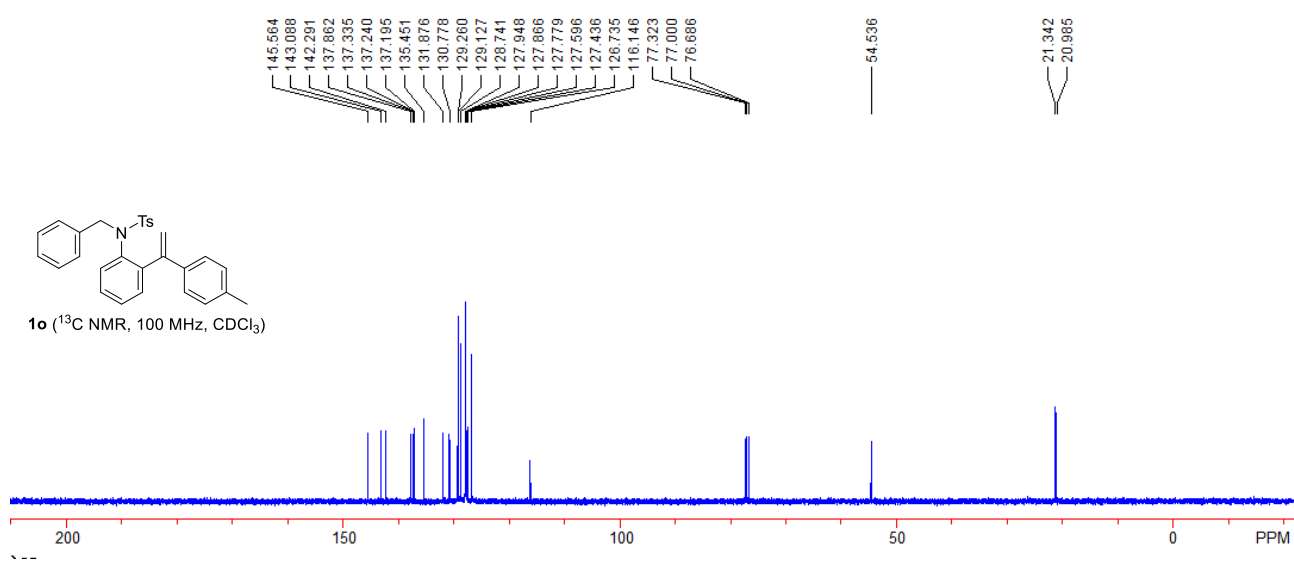

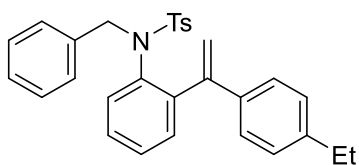

**Compound 1p:** Yield: 1906 mg, 89%; a yellow oil; Eluent: PE/EA = 10/1.  $^1\text{H}$  NMR (400 MHz,  $\text{CDCl}_3$ , TMS)  $\delta$  1.20 (t,  $J = 7.6$  Hz, 3H), 2.36 (s, 3H), 2.60 (q,  $J = 7.6$  Hz, 2H), 4.00-4.60 (m, 2H), 5.06 (s, 1H), 5.62 (s, 1H), 6.86 (d,  $J = 6.8$  Hz, 2H), 6.96 (d,  $J = 7.6$  Hz, 1H), 7.02-7.25 (m, 12H), 7.50 (d,  $J = 8.0$  Hz, 2H);  $^{13}\text{C}\{^1\text{H}\}$ -NMR (101 MHz,  $\text{CDCl}_3$ , TMS)  $\delta_{\text{C}}$  15.4, 21.3, 28.3, 54.5, 116.1, 126.8, 127.4, 127.52, 127.58, 127.7, 127.8, 127.9, 129.1, 129.2, 130.7, 131.9, 135.4, 137.2, 137.3, 138.1, 142.3, 143.1, 143.6, 145.5; IR (neat):  $\nu$  3062, 3028, 2962, 2868, 1597, 1509, 1343, 1156, 1090, 863, 767  $\text{cm}^{-1}$ ; HRMS (ESI-TOF) Calcd for  $\text{C}_{25}\text{H}_{27}\text{NO}_2\text{NaS}$   $[\text{M}+\text{Na}]^+$ : 428.1655, found: 428.1652.

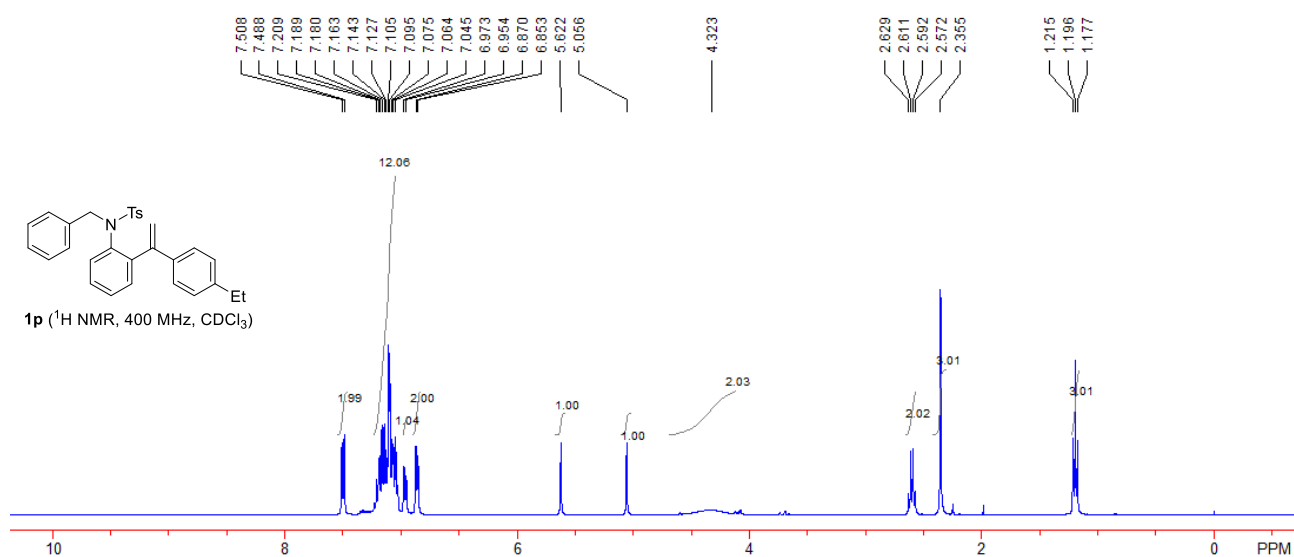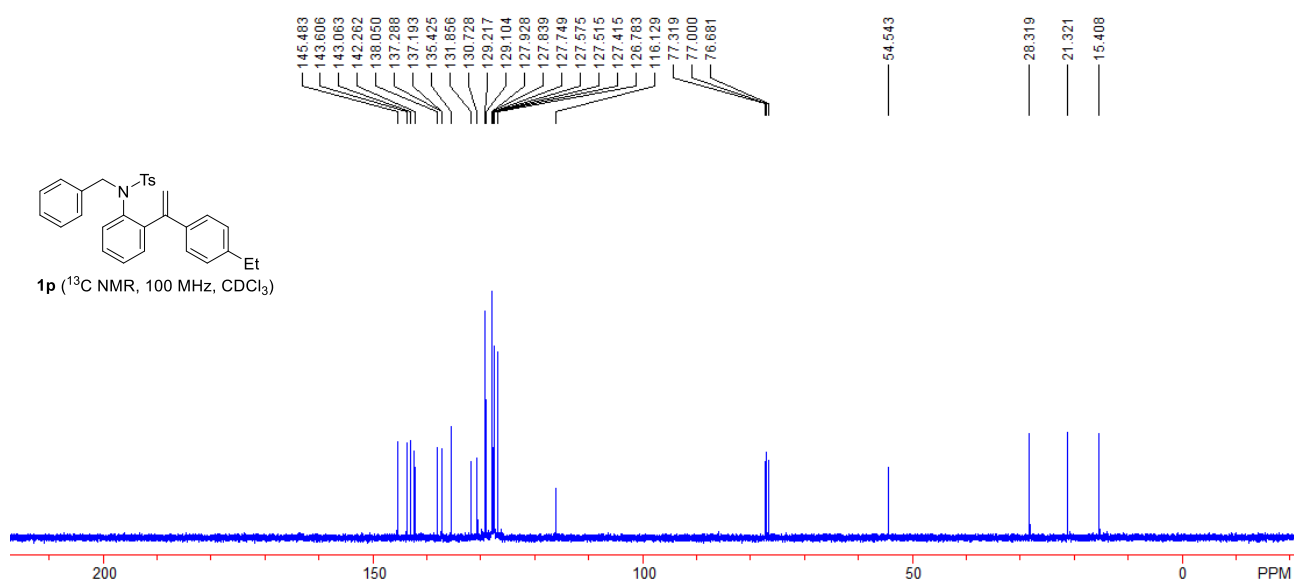

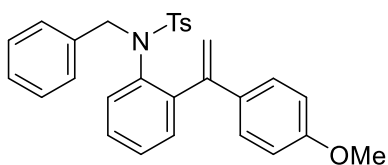

**Compound 1q:** Yield: 2014 mg, 88%; a yellow oil; Eluent: PE/EA = 5/1.  $^1\text{H}$  NMR (400 MHz,  $\text{CDCl}_3$ , TMS)  $\delta$  2.39 (s, 3H), 3.75 (s, 3H), 4.00-4.70 (m, 2H), 4.99 (s, 1H), 5.56 (s, 1H), 6.79 (d,  $J$  = 8.8 Hz, 2H), 6.87 (d,  $J$  = 7.2 Hz, 2H), 6.95 (d,  $J$  = 7.6 Hz, 1H), 7.04-7.27 (m, 10H), 7.52 (d,  $J$  = 8.4 Hz, 2H);  $^{13}\text{C}\{^1\text{H}\}$ -NMR (101 MHz,  $\text{CDCl}_3$ , TMS)  $\delta_{\text{C}}$  21.3, 54.5, 55.0, 113.3, 115.2, 127.4, 127.6, 127.8, 127.86, 127.90, 128.0, 129.1, 129.2, 130.7, 131.8, 133.3, 135.4, 137.1, 137.2, 142.3, 143.1, 145.0, 159.1; IR (neat):  $\nu$  3029, 2931, 2835, 1598, 1508, 1340, 1247, 1153, 1027, 835, 768, 697  $\text{cm}^{-1}$ ; HRMS (ESI-TOF) Calcd for  $\text{C}_{29}\text{H}_{27}\text{NO}_3\text{NaS}$   $[\text{M}+\text{Na}]^+$ : 492.1604, found: 492.1609.

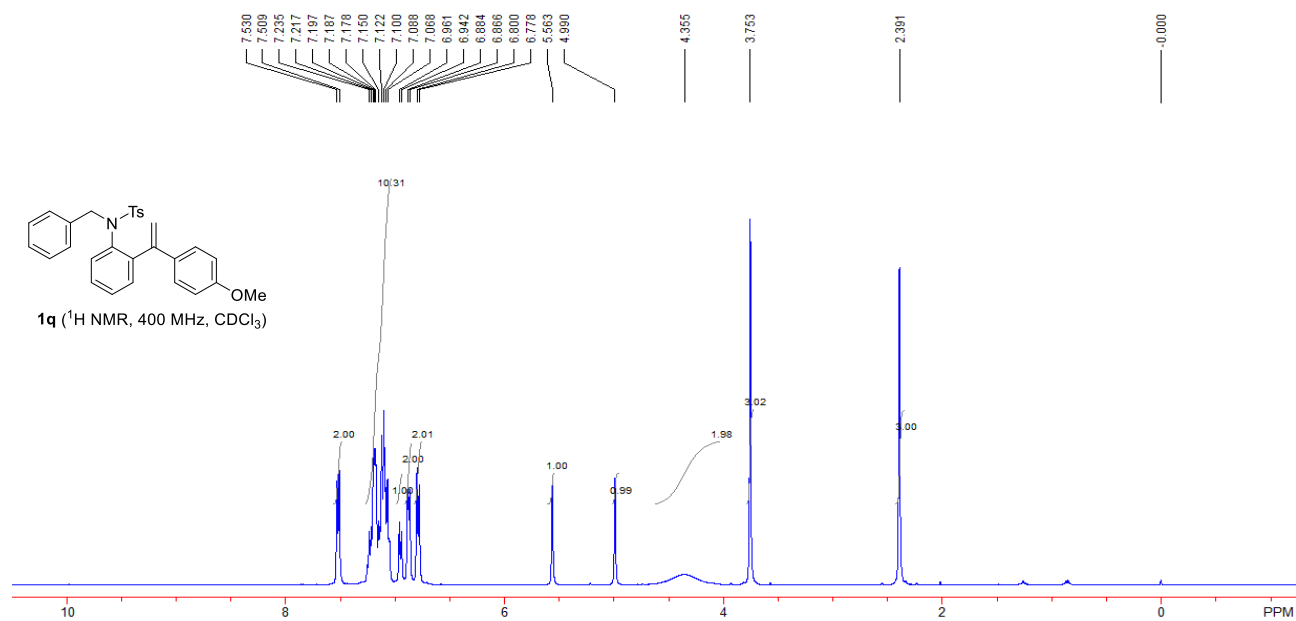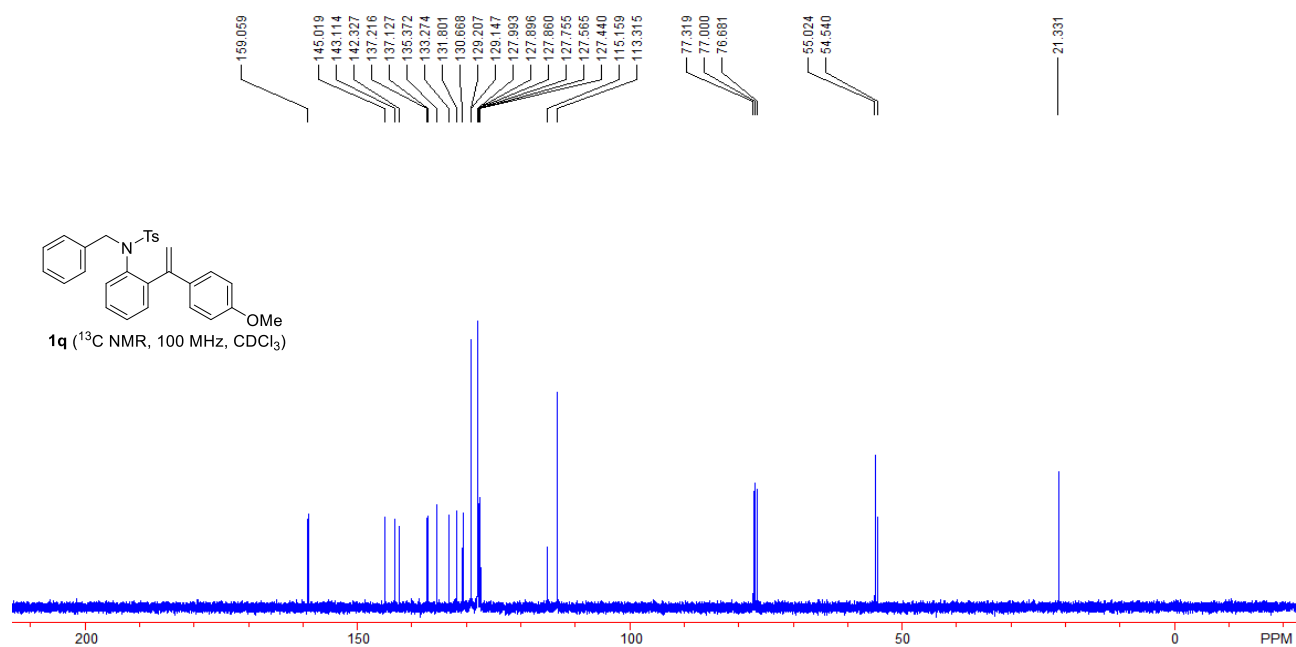

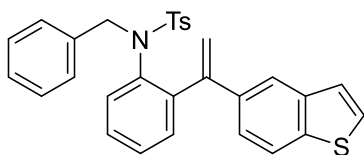

**Compound 1r:** Yield: 1632 mg, 80%; a yellow oil; Eluent: PE/EA = 5/1.  $^1\text{H}$  NMR (400 MHz,  $\text{CDCl}_3$ , TMS)  $\delta$  2.31 (s, 3H), 4.10-4.60 (m, 2H), 5.21 (s, 1H), 5.71 (s, 1H), 6.84 (d,  $J$  = 6.4 Hz, 2H), 6.94-7.04 (m, 4H), 7.08 (d,  $J$  = 8.0 Hz, 2H), 7.13-7.25 (m, 5H), 7.31 (d,  $J$  = 5.6 Hz, 1H), 7.45 (t,  $J$  = 8.0 Hz, 3H), 7.70 (d,  $J$  = 8.0 Hz, 1H);  $^{13}\text{C}\{^1\text{H}\}$ -NMR (101 MHz,  $\text{CDCl}_3$ , TMS)  $\delta_{\text{C}}$  21.3, 54.6, 117.1, 121.8, 122.0, 123.1, 123.9, 126.6, 127.4, 127.72, 127.76, 127.79, 127.9, 129.07, 129.14, 130.5, 131.9, 135.1, 136.9, 137.1, 137.2, 138.8, 139.5, 142.2, 143.1, 145.7; IR (neat):  $\nu$  3062, 3029, 2924, 2864, 1596, 1486, 1339, 1184, 1155, 1045, 1027, 832, 754, 696  $\text{cm}^{-1}$ ; HRMS (ESI-TOF) Calcd for  $\text{C}_{30}\text{H}_{25}\text{NO}_2\text{NaS}_2$   $[\text{M}+\text{Na}]^+$ : 518.1219, found: 518.1214.

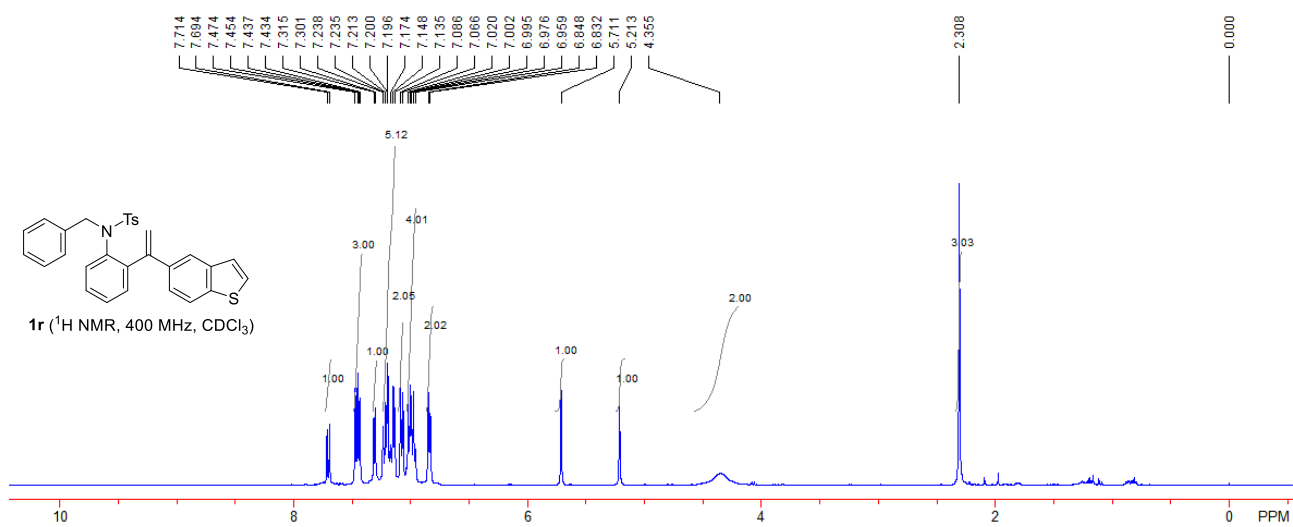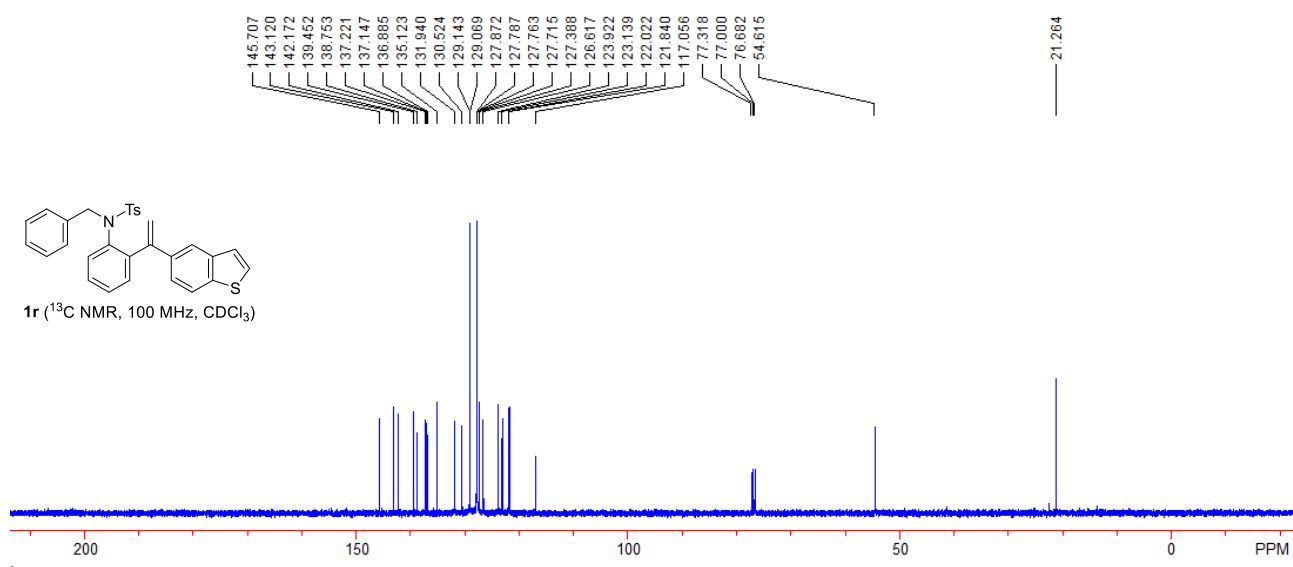

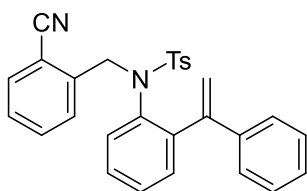

**Compound 1s:** Yield: 1030 mg, 74%; a light yellow solid; Mp: 107-109 °C; Eluent: PE/EA = 10/1.  $^1\text{H}$  NMR (400 MHz,  $\text{CDCl}_3$ , TMS)  $\delta$  2.40 (s, 3H), 4.62 (s, 2H), 5.20 (s, 1H), 5.67 (s, 1H), 7.02-7.09 (m, 3H), 7.10-7.31 (m, 10H), 7.35 (t,  $J = 7.6$  Hz, 2H), 7.48 (t,  $J = 8.0$  Hz, 2H);  $^{13}\text{C}\{^1\text{H}\}$ -NMR (101 MHz,  $\text{CDCl}_3$ , TMS)  $\delta_{\text{C}}$  21.4, 53.3, 111.9, 116.9, 117.4, 126.5, 127.3, 127.9, 128.0, 128.1, 128.3, 129.3, 129.5, 130.7, 132.1, 132.3, 135.3, 137.6, 139.0, 140.3, 142.0, 143.8, 145.4; IR (neat):  $\nu$  3061, 1596, 1488, 1445, 1345, 1184, 1156, 1051, 911, 868, 779, 709  $\text{cm}^{-1}$ ; HRMS (ESI-TOF) Calcd for  $\text{C}_{29}\text{H}_{24}\text{N}_2\text{O}_2\text{NaS}[\text{M}+\text{Na}]^+$ : 487.1451, found: 487.1452.

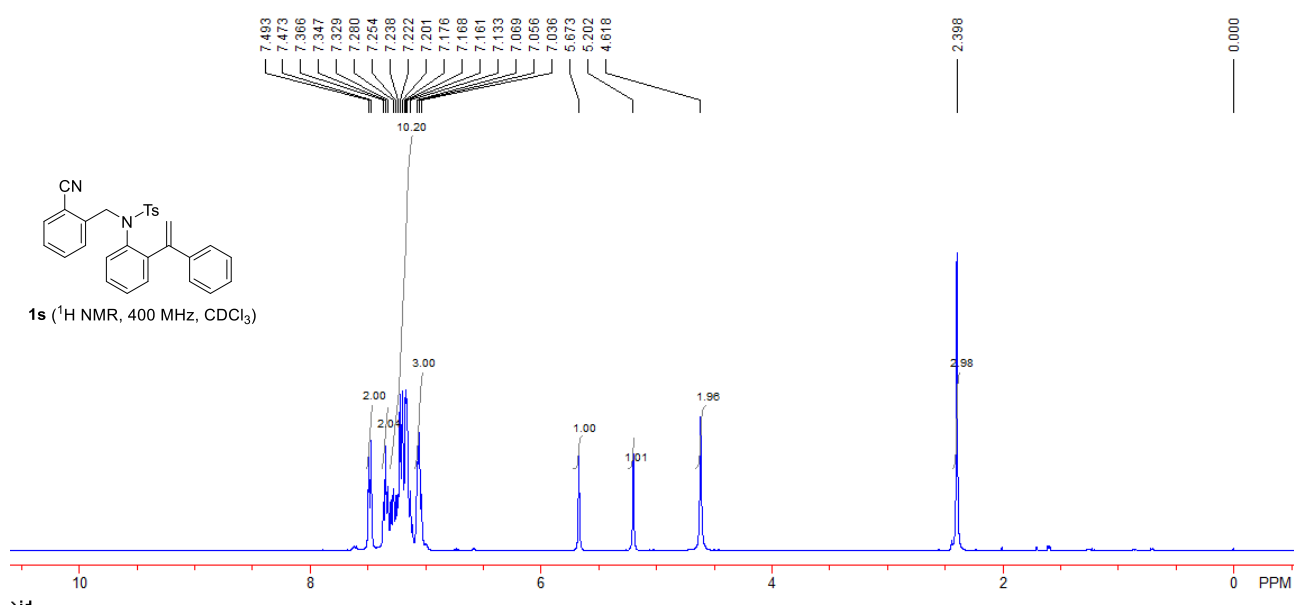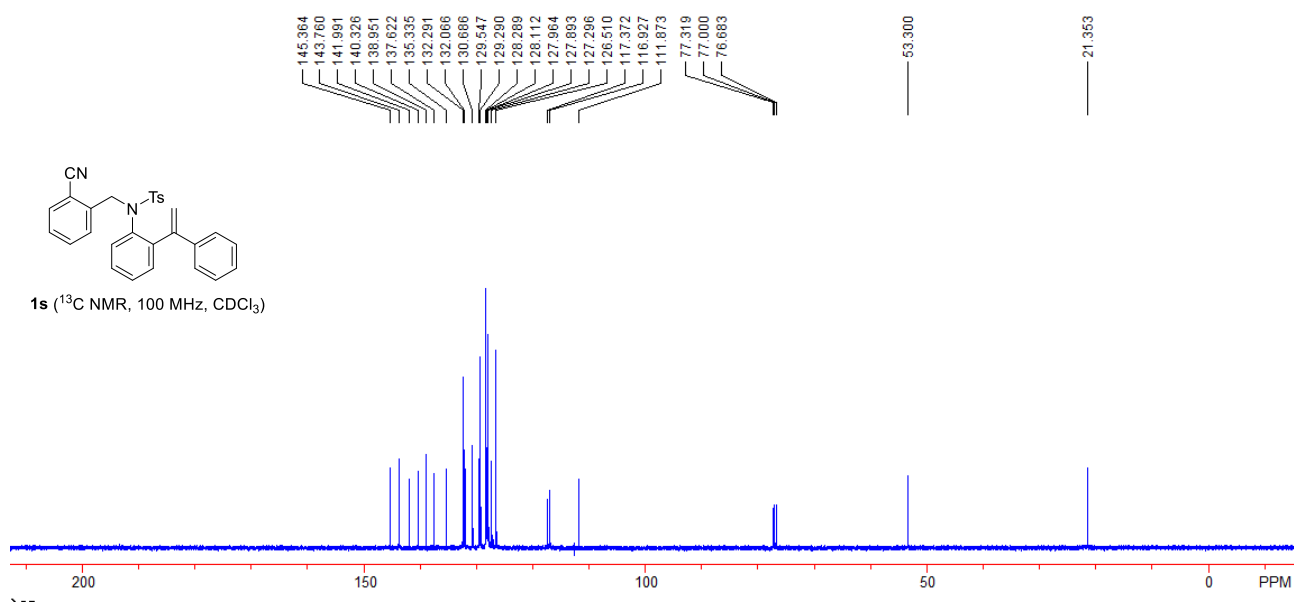

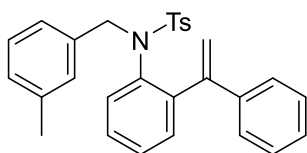

**Compound 1t:** Yield: 1237 mg, 91%; a yellow oil; Eluent: PE/EA = 10/1.  $^1\text{H}$  NMR (400 MHz,  $\text{CDCl}_3$ , TMS)  $\delta$  2.07 (s, 3H), 2.36 (s, 3H), 4.00-4.60 (m, 2H), 5.20 (d,  $J$  = 0.8 Hz, 1H), 5.68 (d,  $J$  = 0.8 Hz, 1H), 6.58-6.64 (m, 2H), 6.85-6.96 (m, 3H), 7.10-7.25 (m, 10H), 7.52 (d,  $J$  = 8.0 Hz, 2H);  $^{13}\text{C}\{^1\text{H}\}$ -NMR (101 MHz,  $\text{CDCl}_3$ , TMS)  $\delta_{\text{C}}$  20.9, 21.3, 54.7, 117.0, 126.2, 126.9, 127.4, 127.67, 127.68, 127.8, 127.97, 128.0, 128.2, 129.1, 130.0, 130.5, 131.9, 135.1, 137.39, 137.42, 137.44, 140.7, 142.3, 143.1, 145.7; IR (neat):  $\nu$  3025, 2919, 1596, 1486, 1379, 1184, 1089, 860, 765, 702  $\text{cm}^{-1}$ ; HRMS (ESI-TOF) Calcd for  $\text{C}_{29}\text{H}_{27}\text{NO}_2\text{NaS}$   $[\text{M}+\text{Na}]^+$ : 476.1655, found: 476.1661.

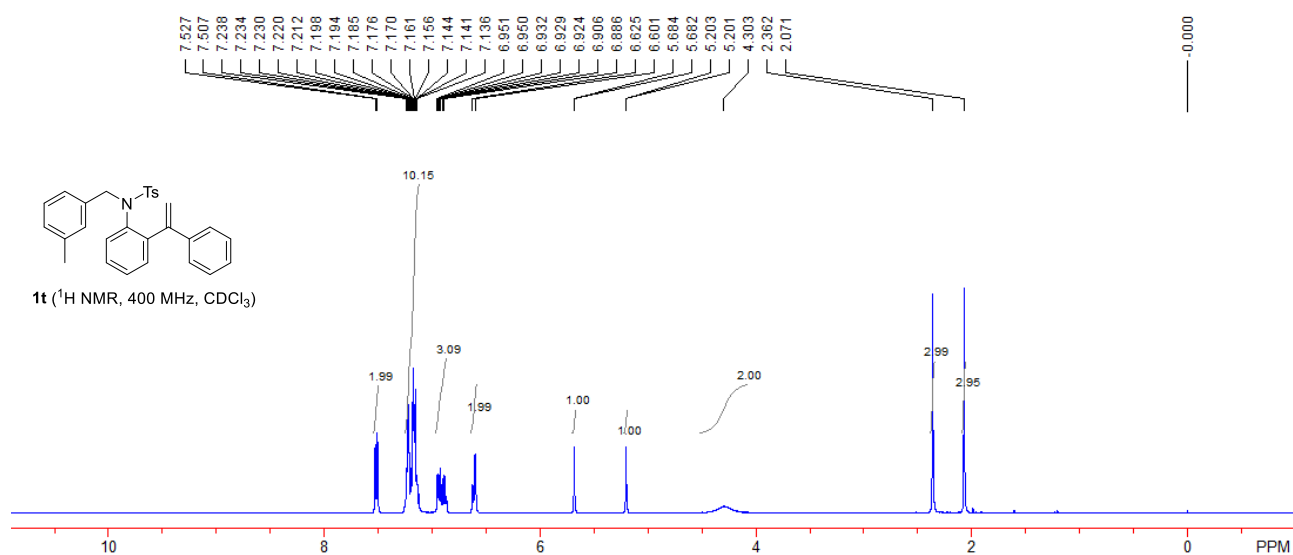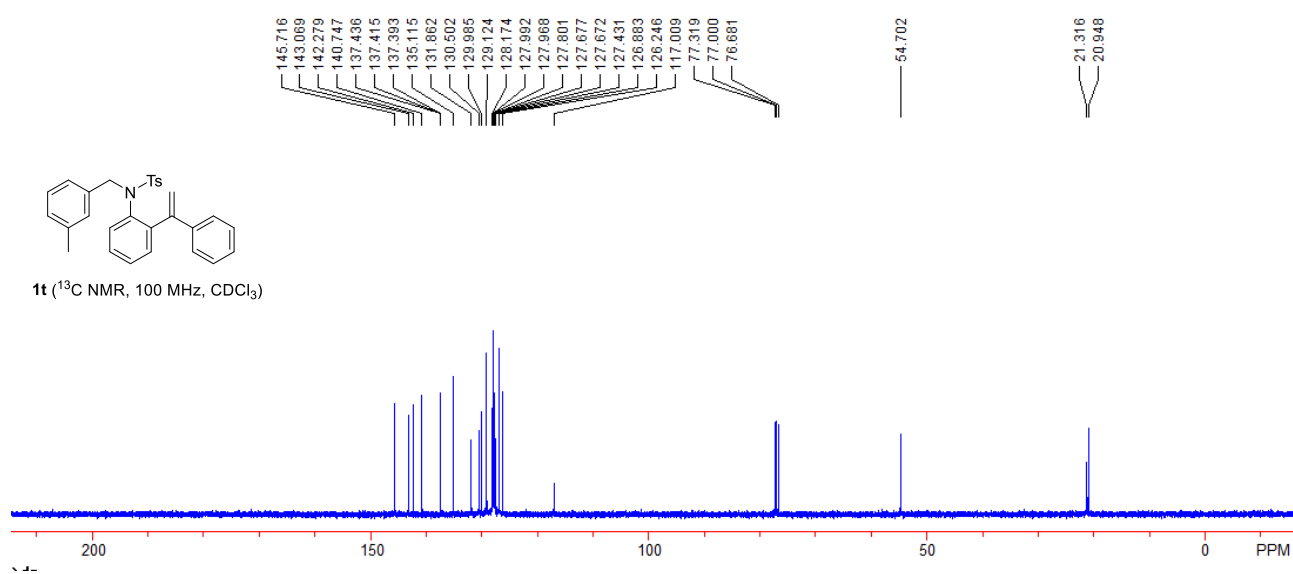

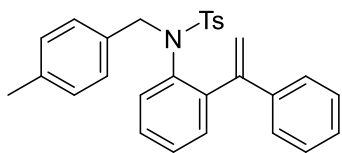

**Compound 1u:** Yield: 1210 mg, 89%; a yellow oil; Eluent: PE/EA = 10/1.  $^1\text{H}$  NMR (400 MHz,  $\text{CDCl}_3$ , TMS)  $\delta$  2.17 (s, 3H), 2.36 (s, 3H), 4.00-4.60 (m, 2H), 5.17 (s, 1H), 5.65 (s, 1H), 6.72 (d,  $J$  = 6.4 Hz, 2H), 6.83 (d,  $J$  = 6.4 Hz, 2H), 6.93 (d,  $J$  = 7.6 Hz, 1H), 7.08-7.25 (m, 10H), 7.52 (t,  $J$  = 8.0 Hz, 2H);  $^{13}\text{C}\{^1\text{H}\}$ -NMR (101 MHz,  $\text{CDCl}_3$ , TMS)  $\delta_{\text{C}}$  20.9, 21.3, 54.4, 117.0, 126.9, 127.3, 127.6, 127.7, 128.0, 128.5, 129.1, 129.2, 130.6, 131.8, 132.1, 137.1, 137.2, 140.8, 142.3, 143.1, 145.7; IR (neat):  $\nu$  3051, 2920, 2862, 1596, 1486, 1341, 1155, 1089, 865, 781, 705  $\text{cm}^{-1}$ ; HRMS (ESI-TOF) Calcd for  $\text{C}_{29}\text{H}_{27}\text{NO}_2\text{NaS}$   $[\text{M}+\text{Na}]^+$ : 476.1655, found: 476.1656.

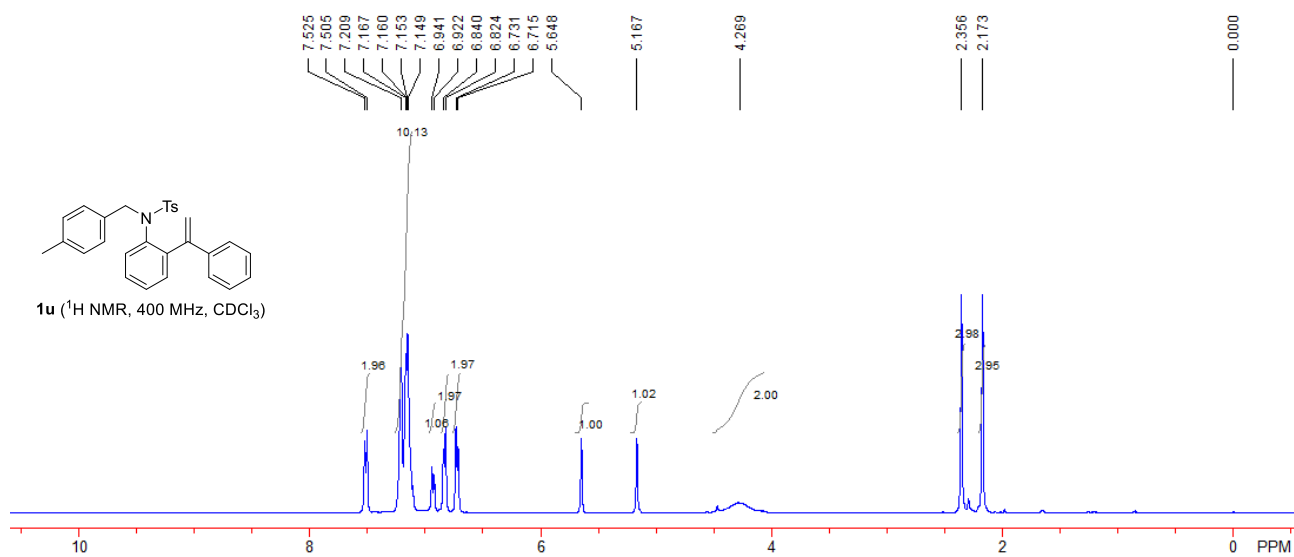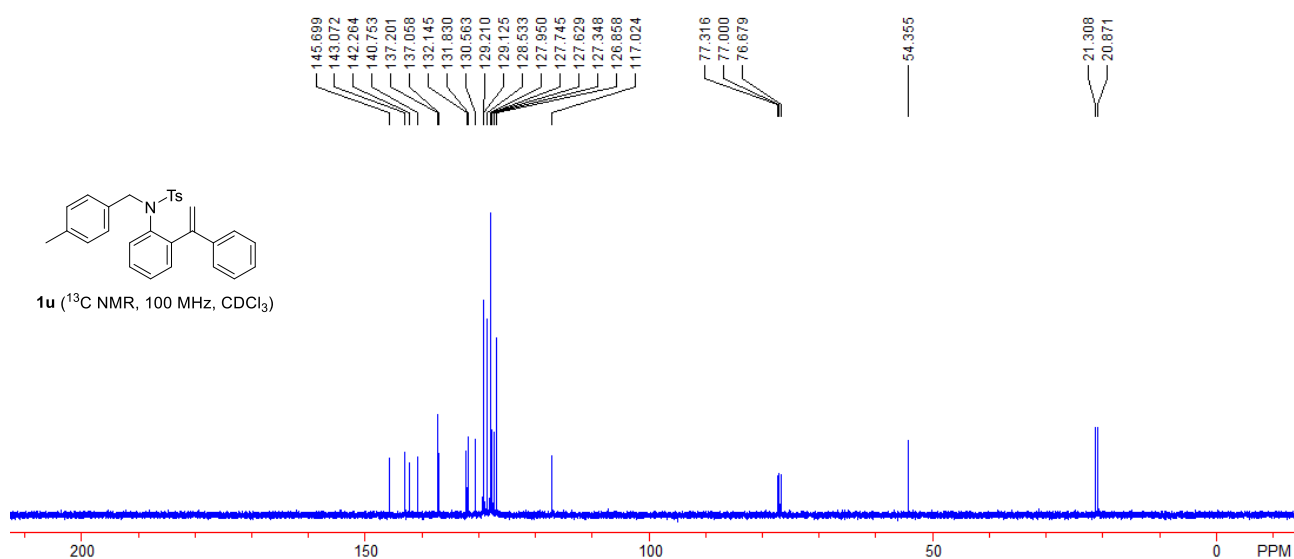

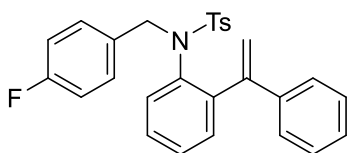

**Compound 1v:** Yield: 1234 mg, 90%; a yellow oil; Eluent: PE/EA = 10/1.  $^1\text{H}$  NMR (400 MHz,  $\text{CDCl}_3$ , TMS)  $\delta$  2.38 (s, 3H), 4.00-4.60 (m, 2H), 5.14 (s, 1H), 5.65 (s, 1H), 6.71 (t,  $J = 8.8$  Hz, 2H), 6.78-6.84 (m, 2H), 6.93 (d,  $J = 8.0$  Hz, 1H), 7.12-7.27 (m, 10H), 7.50 (d,  $J = 8.0$  Hz, 2H);  $^{13}\text{C}\{^1\text{H}\}$ -NMR (101 MHz,  $\text{CDCl}_3$ , TMS)  $\delta_{\text{C}}$  21.3, 53.9, 114.7 (d,  $J = 21.2$  Hz), 117.1, 126.7, 127.5, 127.8, 128.0, 128.1, 129.2, 130.5, 131.0 (d,  $J = 7.9$  Hz), 131.1 (d,  $J = 3.3$  Hz), 132.0, 136.9, 137.1, 140.6, 142.2, 143.3, 145.8, 162.1 (d,  $J = 244.9$  Hz);  $^{19}\text{F}$  NMR (376 MHz,  $\text{CDCl}_3$ )  $\delta$  -114.3; IR (neat):  $\nu$  3055, 2922, 1599, 1508, 1444, 1342, 1220, 1089, 851, 814, 764, 705  $\text{cm}^{-1}$ ; HRMS (ESI-TOF) Calcd for  $\text{C}_{28}\text{H}_{24}\text{NO}_2\text{FNaS}$   $[\text{M}+\text{Na}]^+$ : 480.1404, found: 480.1413.

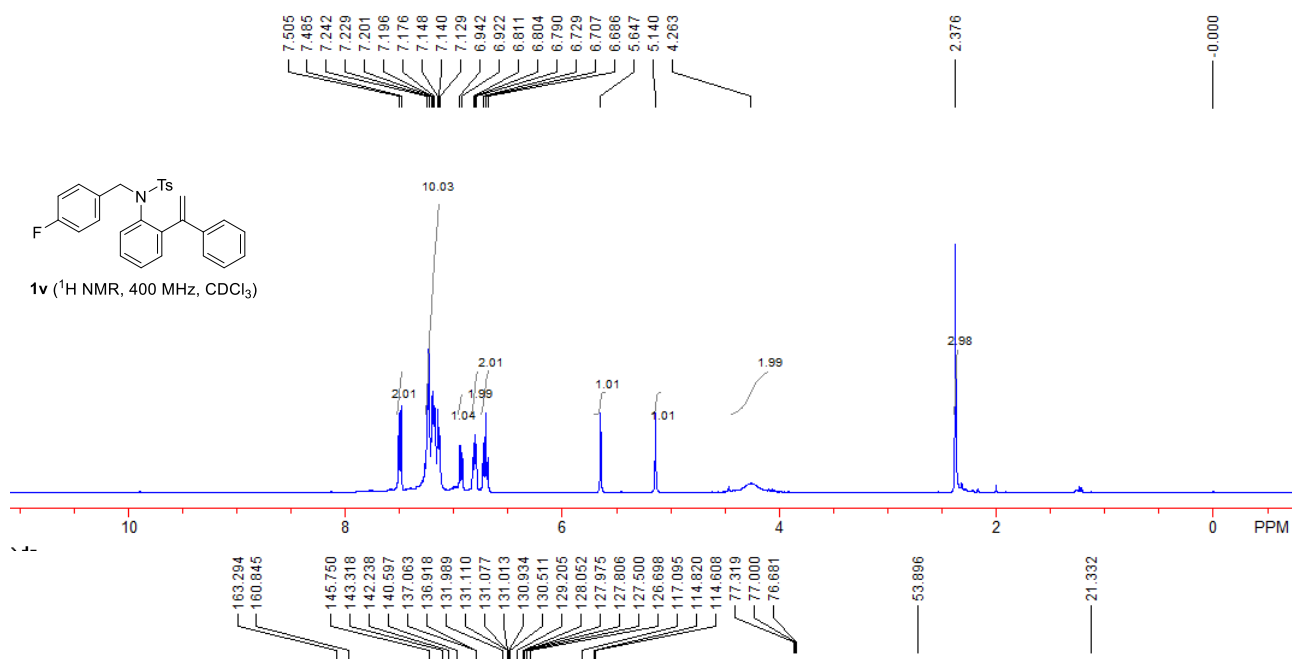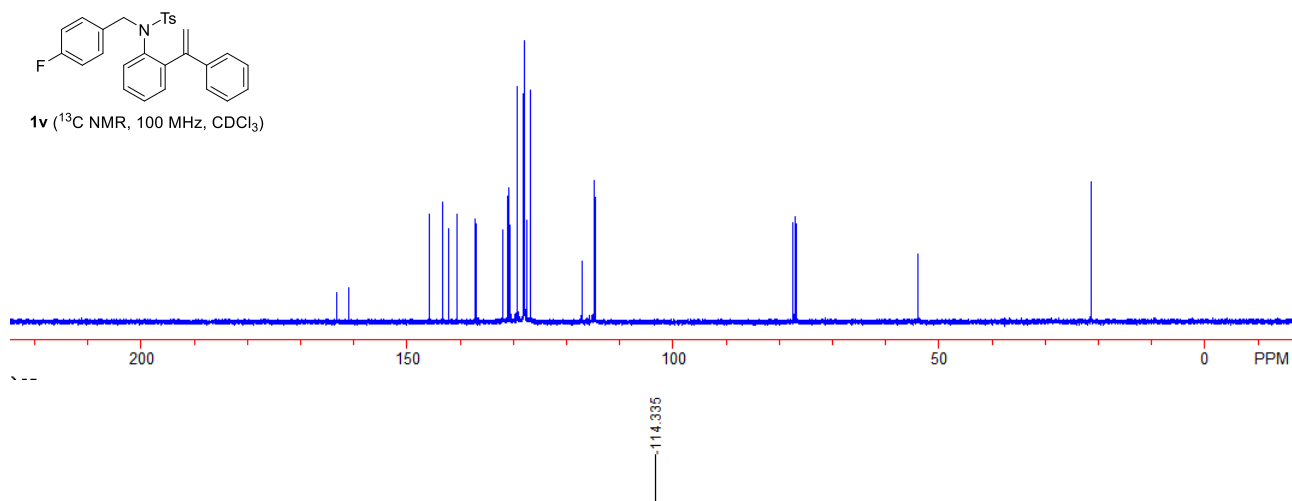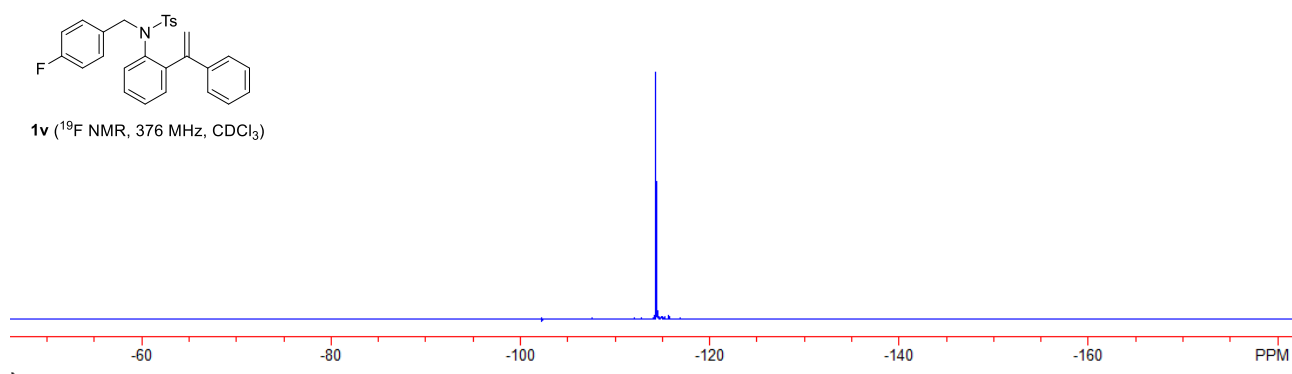

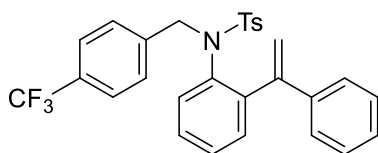

**Compound 1w:** Yield: 1126 mg, 74%; a yellow oil; Eluent: PE/EA = 10/1.  $^1\text{H}$  NMR (400 MHz,  $\text{CDCl}_3$ , TMS)  $\delta$  2.39 (s, 3H), 4.30-4.45 (m, 2H), 5.18 (s, 1H), 5.70 (s, 1H), 6.95 (d,  $J = 8.0$  Hz, 2H), 7.03 (d,  $J = 8.4$  Hz, 1H), 7.10-7.33 (m, 12H), 7.48 (d,  $J = 8.0$  Hz, 2H);  $^{13}\text{C}\{^1\text{H}\}$ -NMR (101 MHz,  $\text{CDCl}_3$ , TMS)  $\delta_{\text{C}}$  21.4, 54.5, 117.3, 123.9 (q,  $J = 270.6$  Hz), 124.8 (q,  $J = 3.7$  Hz), 126.6, 127.7, 128.1, 128.2, 129.3, 129.4, 129.6 (q,  $J = 32.5$  Hz), 130.3, 132.2, 136.8, 137.5, 139.5, 140.5, 142.1, 143.6, 145.8;  $^{19}\text{F}$  NMR (376 MHz,  $\text{CDCl}_3$ )  $\delta$  -62.5; IR (neat):  $\nu$  2923, 1596, 1493, 1419, 1321, 1157, 1113, 1089, 1018, 908, 828, 766, 706  $\text{cm}^{-1}$ ; HRMS (ESI-TOF) Calcd for  $\text{C}_{29}\text{H}_{27}\text{NO}_2\text{NaS}$   $[\text{M}+\text{Na}]^+$ : 476.1655, found: 476.1661.

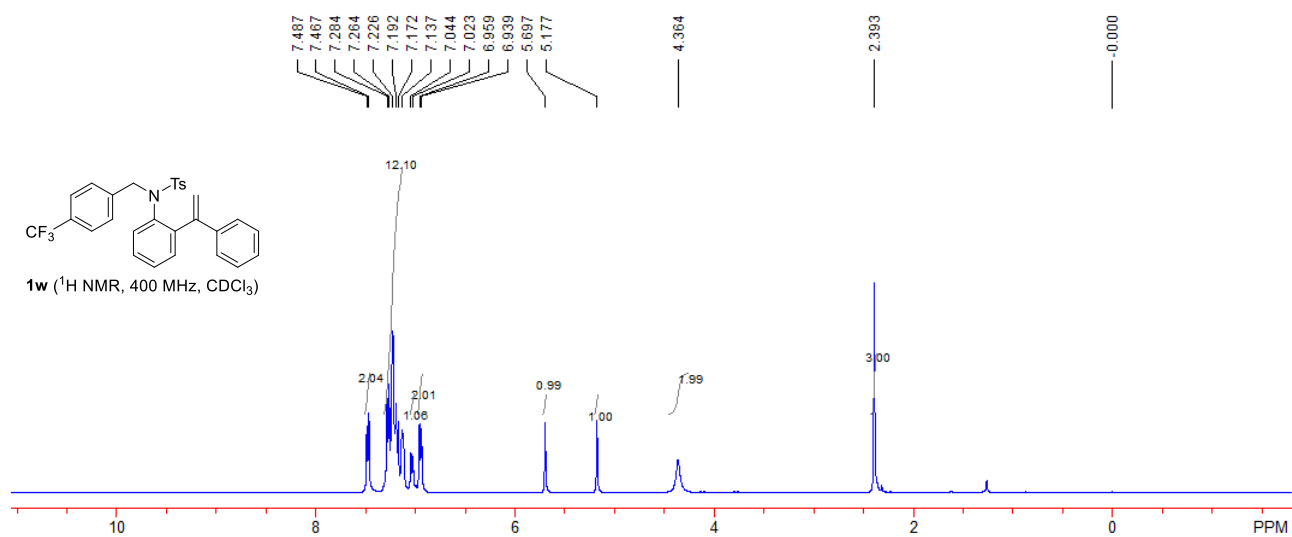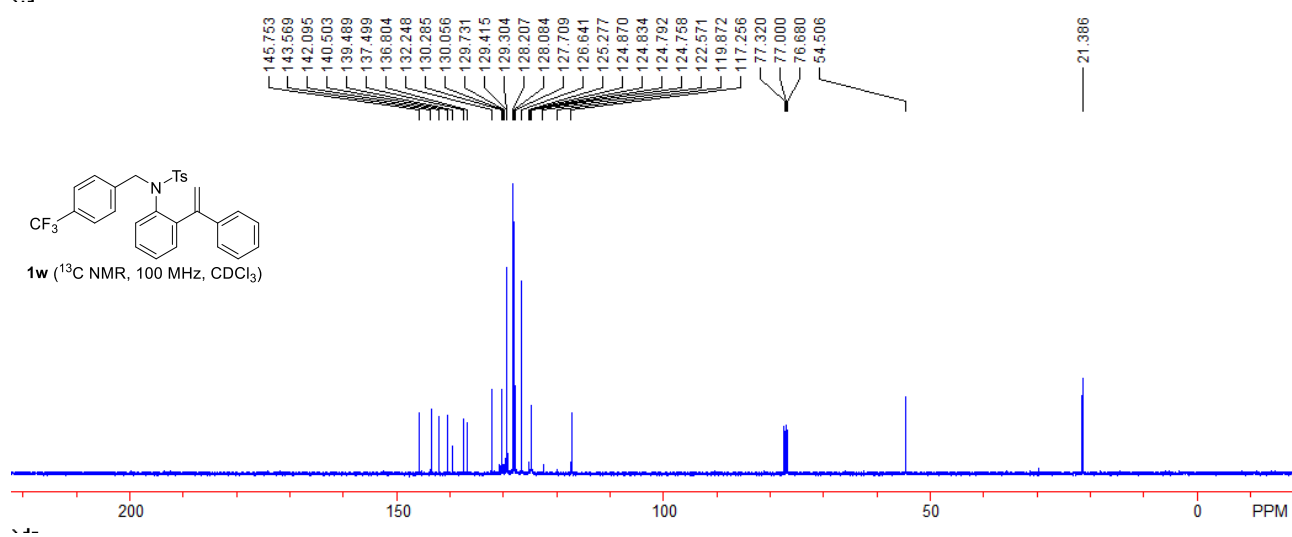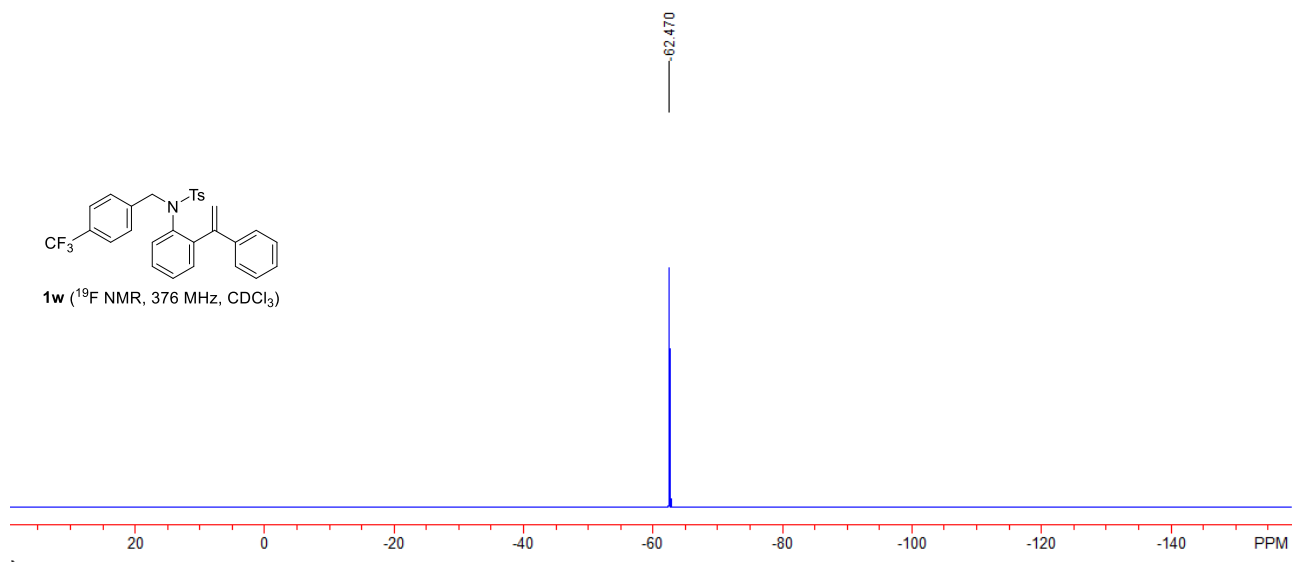

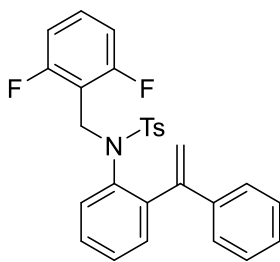

**Compound 1x:** Yield: 1212 mg, 85%; a light yellow solid; Mp: 118-120 °C; Eluent: PE/EA = 10/1.  $^1\text{H}$  NMR (400 MHz,  $\text{CDCl}_3$ , TMS)  $\delta$  2.36 (s, 3H), 4.30-4.60 (m, 2H), 5.11 (s, 1H), 5.62 (s, 1H), 6.53-6.63 (m, 2H), 7.00-7.09 (m, 1H), 7.12-7.31 (m, 11H), 7.41 (d,  $J$  = 8.0 Hz, 2H);  $^{13}\text{C}\{^1\text{H}\}$ -NMR (101 MHz,  $\text{CDCl}_3$ , TMS)  $\delta_{\text{C}}$  21.3, 42.7, 110.9 (dd,  $J_1$  = 19.0 Hz,  $J_2$  = 6.4 Hz), 111.1 (t,  $J$  = 19.2 Hz), 117.1, 126.9, 127.3, 127.86, 127.90, 128.1, 128.4, 129.0, 129.6, 130.1 (t,  $J$  = 10.3 Hz), 132.0, 135.9, 137.2, 140.7, 142.5, 143.4, 145.9, 161.7 (dd,  $J_1$  = 250.1 Hz,  $J_2$  = 7.2 Hz);  $^{19}\text{F}$  NMR (376 MHz,  $\text{CDCl}_3$ )  $\delta$  -111.9; IR (neat):  $\nu$  3051, 2942, 1594, 1487, 1320, 1267, 1196, 1156, 1088, 947, 907, 814, 726  $\text{cm}^{-1}$ ; HRMS (ESI-TOF) Calcd for  $\text{C}_{28}\text{H}_{23}\text{NO}_2\text{F}_2\text{NaS}$   $[\text{M}+\text{Na}]^+$ : 498.1310, found: 498.1315.

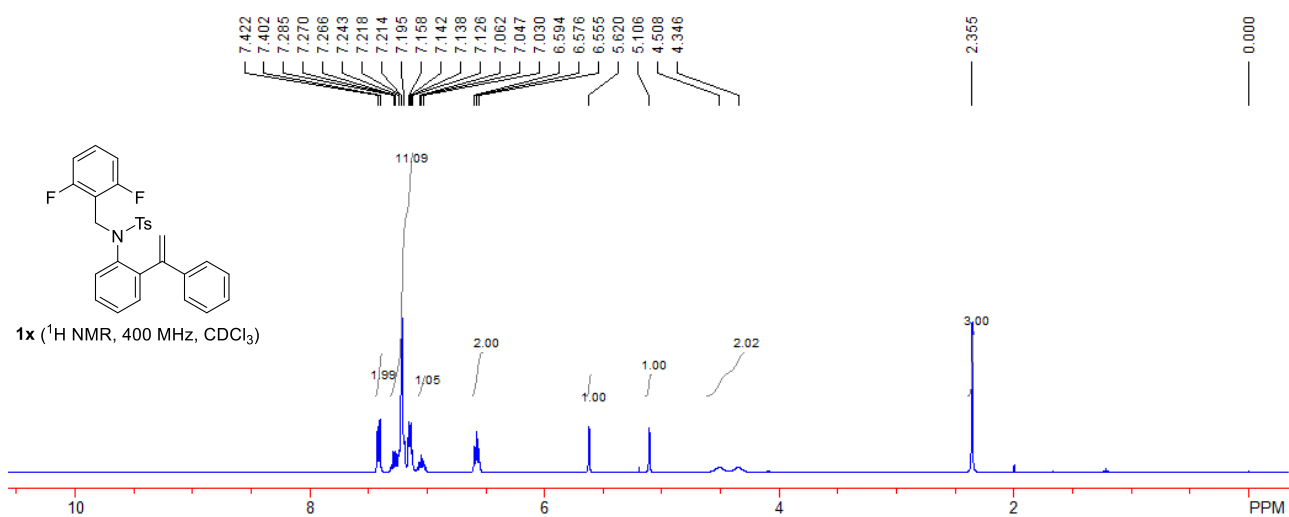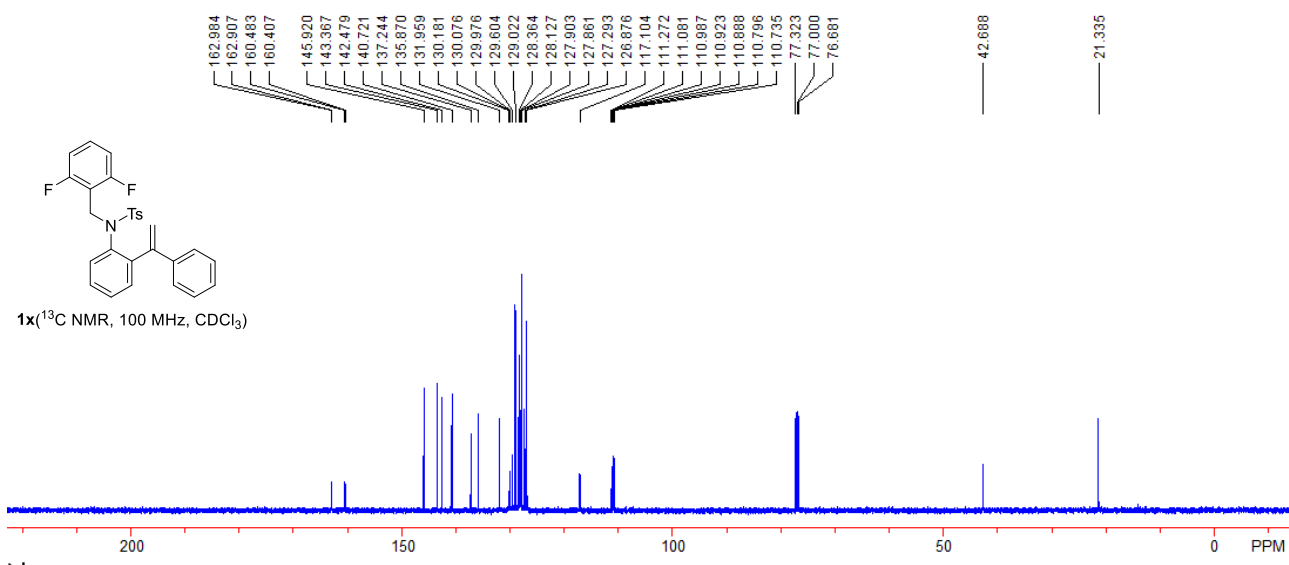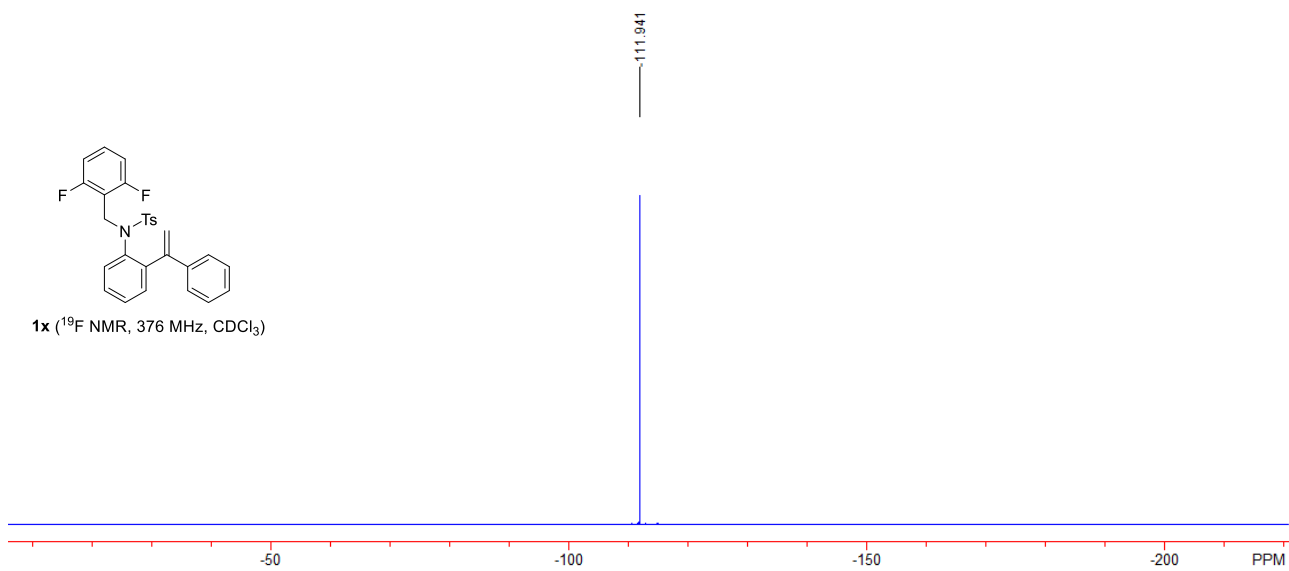

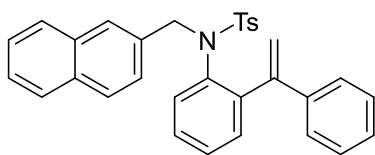

**Compound 1y:** Yield: 1174 mg, 80%; a light yellow solid; Mp: 123-125 °C; Eluent: PE/EA = 10/1.  $^1\text{H}$  NMR (400 MHz,  $\text{CDCl}_3$ , TMS)  $\delta$  2.28 (s, 3H), 4.30-4.70 (m, 2H), 5.22 (s, 1H), 5.68 (s, 1H), 7.01 (d,  $J = 7.6$  Hz, 2H), 7.06-7.18 (m, 11H), 7.29-7.34 (m, 2H), 7.44-7.56 (m, 4H), 7.59-7.64 (m, 1H);  $^{13}\text{C}\{^1\text{H}\}$ -NMR (101 MHz,  $\text{CDCl}_3$ , TMS)  $\delta_{\text{C}}$  21.4, 55.0, 117.2, 125.77, 125.80, 126.8, 126.9, 127.4, 127.51, 127.60, 127.66, 127.8, 127.9, 128.01, 128.05, 128.3, 129.2, 130.5, 132.0, 132.6, 132.74, 132.78, 137.3, 137.4, 140.6, 142.2, 143.2, 145.6; IR (neat):  $\nu$  3053, 2921, 1596, 1489, 1441, 1361, 1305, 1156, 1037, 928, 816, 765, 705  $\text{cm}^{-1}$ ; HRMS (ESI-TOF) Calcd for  $\text{C}_{32}\text{H}_{27}\text{NO}_2\text{NaS}$   $[\text{M}+\text{Na}]^+$ : 512.1655, found: 512.1653.

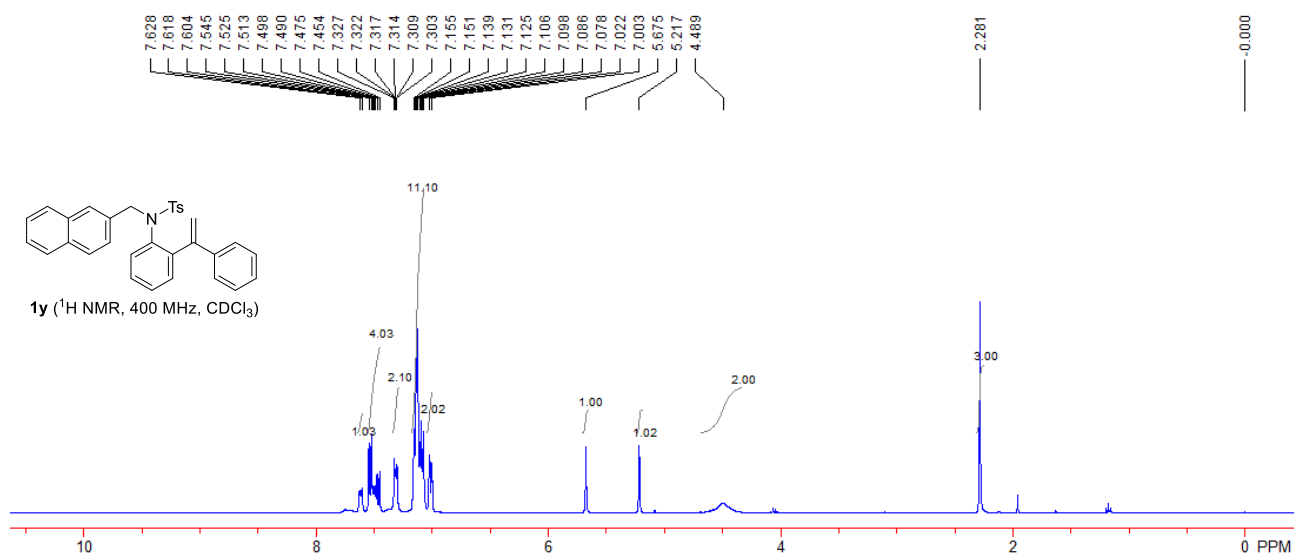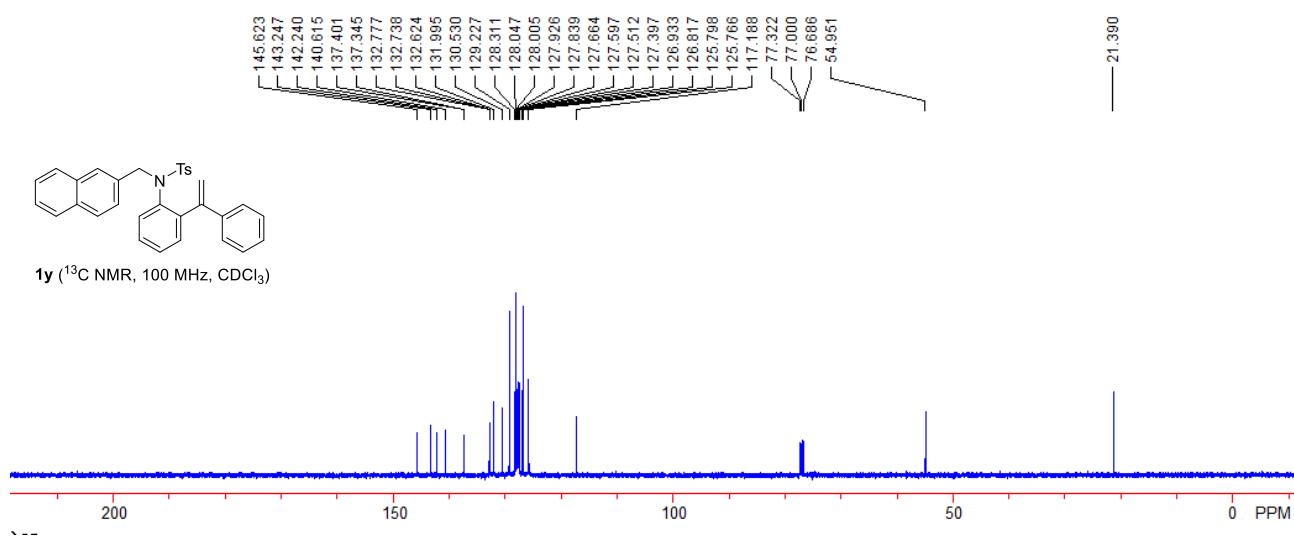

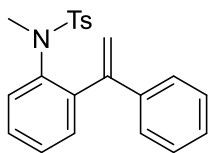

**Compound 1z:** Yield: 1024 mg, 94%; a light yellow solid; Mp: 124-126 °C; Eluent: PE/EA = 10/1.

$^1\text{H}$  NMR (400 MHz,  $\text{CDCl}_3$ , TMS)  $\delta$  2.35 (s, 3H), 2.58 (s, 3H), 5.38 (s, 1H), 5.66 (s, 1H), 6.79 (d,  $J$  = 7.6 Hz, 1H), 7.16-7.32 (m, 9H), 7.37 (d,  $J$  = 7.6 Hz, 1H), 7.48 (d,  $J$  = 7.6 Hz, 2H);  $^{13}\text{C}\{^1\text{H}\}$ -NMR (101 MHz,  $\text{CDCl}_3$ , TMS)  $\delta_{\text{C}}$  21.2, 38.1, 116.5, 126.7, 127.1, 127.2, 127.7, 128.0, 128.2, 129.1, 131.3, 134.9, 139.6, 141.3, 142.9, 143.1, 147.4; IR (neat):  $\nu$  3062, 3025, 2919, 1596, 1493, 1344, 1270, 1108, 1029, 900, 774, 708  $\text{cm}^{-1}$ ; HRMS (ESI-TOF) Calcd for  $\text{C}_{23}\text{H}_{23}\text{NO}_2\text{NaS}$   $[\text{M}+\text{Na}]^+$ : 400.1342, found: 400.1340.

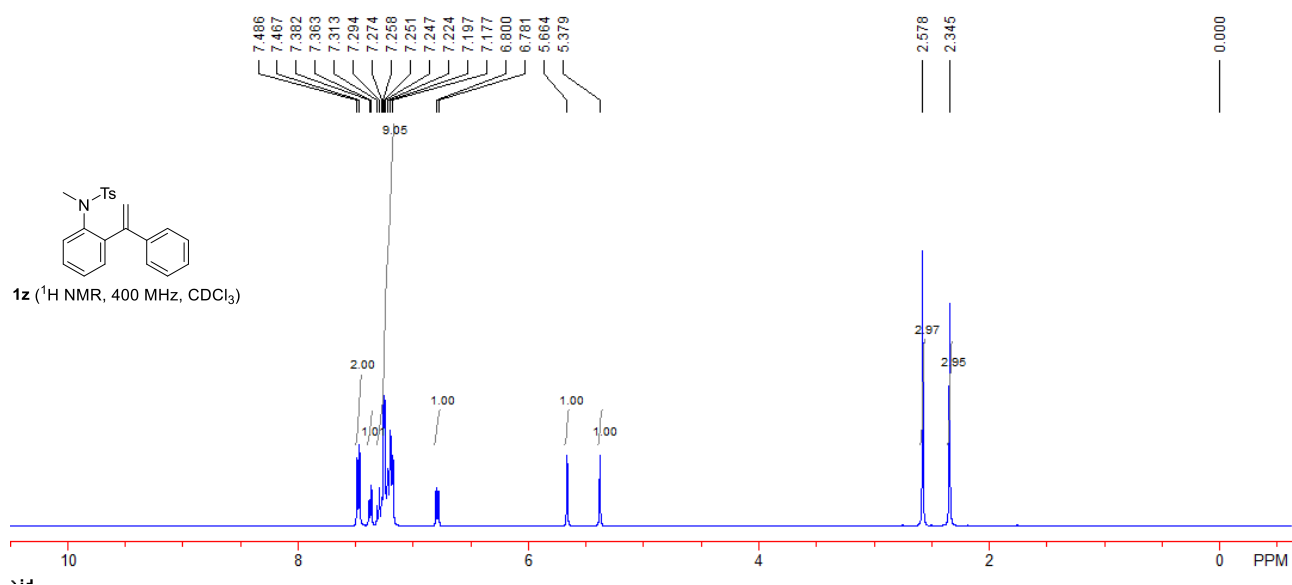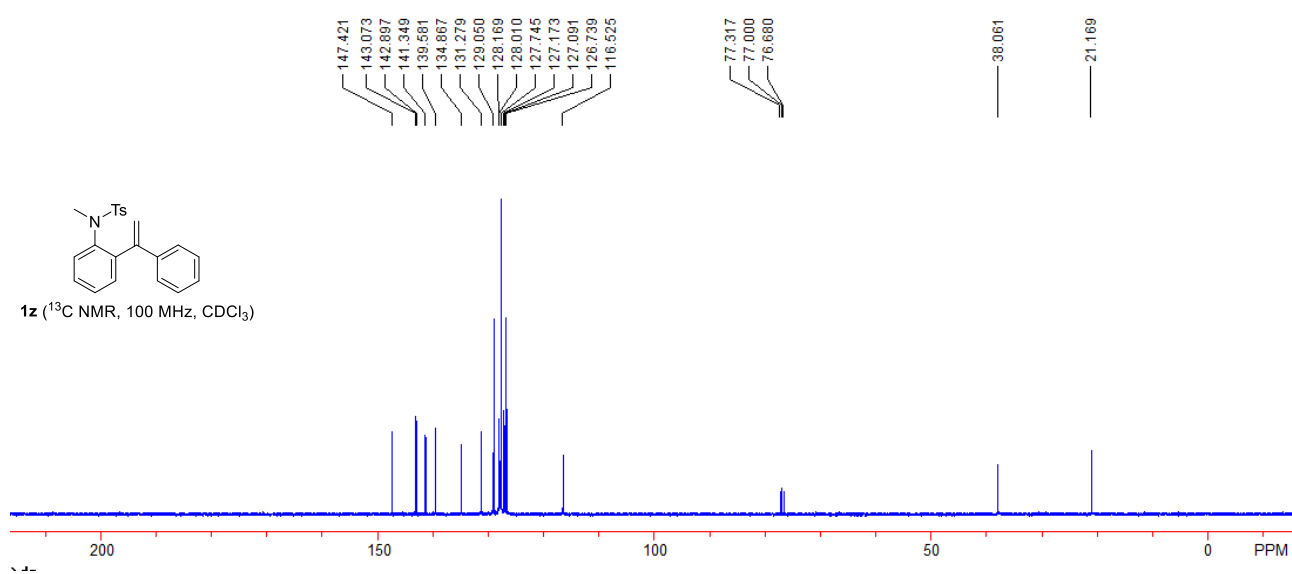

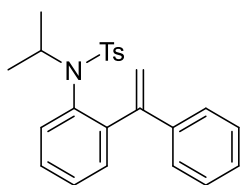

**Compound 1aa:** Yield: 904 mg, 77%; a light yellow solid; Mp: 119-121 °C; Eluent: PE/EA = 10/1.  $^1\text{H}$  NMR (400 MHz,  $\text{CDCl}_3$ , TMS)  $\delta$  0.83 (d,  $J = 6.0$  Hz, 3H), 0.94 (d,  $J = 5.6$  Hz, 3H), 2.40 (s, 3H), 3.95-4.05 (m, 1H), 5.71 (s, 1H), 5.86 (s, 1H), 7.13 (d,  $J = 7.6$  Hz, 1H), 7.20-7.34 (m, 10H), 7.56 (d,  $J = 8.0$  Hz, 2H);  $^{13}\text{C}\{^1\text{H}\}$ -NMR (101 MHz,  $\text{CDCl}_3$ , TMS)  $\delta_{\text{C}}$  20.7, 21.4, 22.6, 53.4, 118.2, 127.2, 127.4, 127.5, 128.0, 128.1, 129.3, 131.8, 132.6, 135.3, 138.0, 141.2, 143.1, 143.5, 145.9; IR (neat):  $\nu$  3023, 2986, 2970, 2934, 1595, 1485, 1386, 1333, 1269, 1180, 1125, 1025, 922, 866, 767, 706  $\text{cm}^{-1}$ ; HRMS (ESI-TOF) Calcd for  $\text{C}_{24}\text{H}_{25}\text{NO}_2\text{NaS}$   $[\text{M}+\text{Na}]^+$ : 414.1498, found: 414.1501.

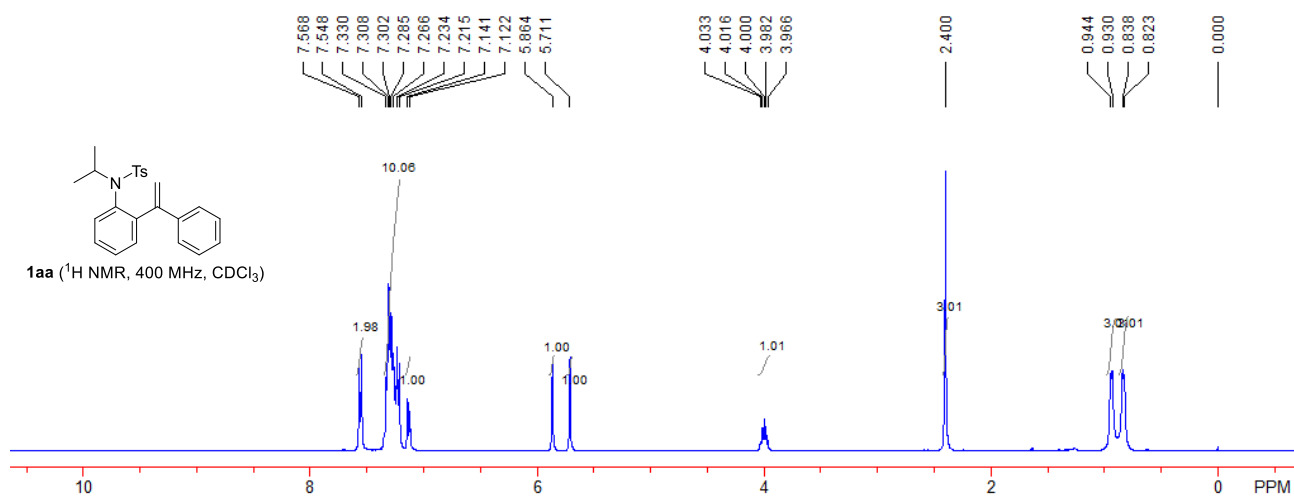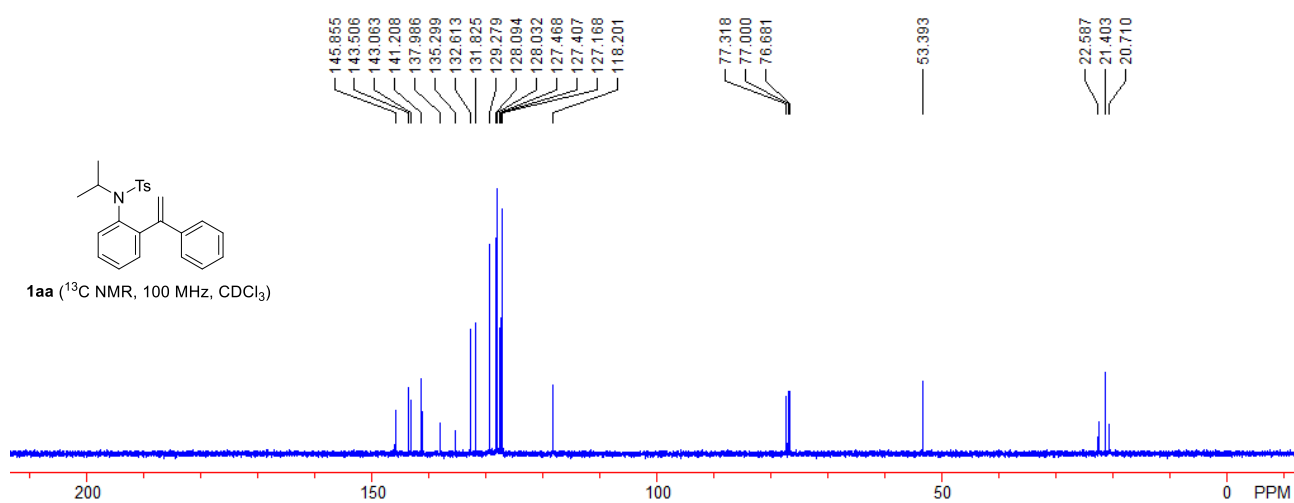

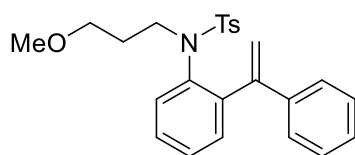

**Compound 1ab:** Yield: 1150 mg, 91%; a yellow oil; Eluent: PE/EA = 10/1.  $^1\text{H}$  NMR (400 MHz,  $\text{CDCl}_3$ , TMS)  $\delta$  1.28-1.38 (m, 2H), 2.36 (s, 3H), 3.00 (t,  $J = 5.6$  Hz, 2H), 3.07 (s, 3H), 3.26 (t,  $J = 8.0$  Hz, 2H), 5.40 (s, 1H), 5.74 (s, 1H), 7.02 (d,  $J = 7.6$  Hz, 1H), 7.17-7.32 (m, 10H), 7.52 (d,  $J = 8.0$  Hz, 2H);  $^{13}\text{C}\{^1\text{H}\}$ -NMR (101 MHz,  $\text{CDCl}_3$ , TMS)  $\delta_{\text{C}}$  21.2, 27.6, 48.4, 58.0, 69.5, 117.2, 126.8, 127.3, 127.7, 127.85, 127.88, 127.91, 129.0, 129.1, 131.9, 136.2, 137.7, 140.9, 142.4, 143.0, 146.3; IR (neat):  $\nu$  3056, 2924, 2871, 1596, 1486, 1444, 1385, 1186, 1110, 910, 781, 706  $\text{cm}^{-1}$ ; HRMS (ESI-TOF) Calcd for  $\text{C}_{25}\text{H}_{27}\text{NO}_3\text{NaS}$   $[\text{M}+\text{Na}]^+$ : 444.1604, found: 444.1610.

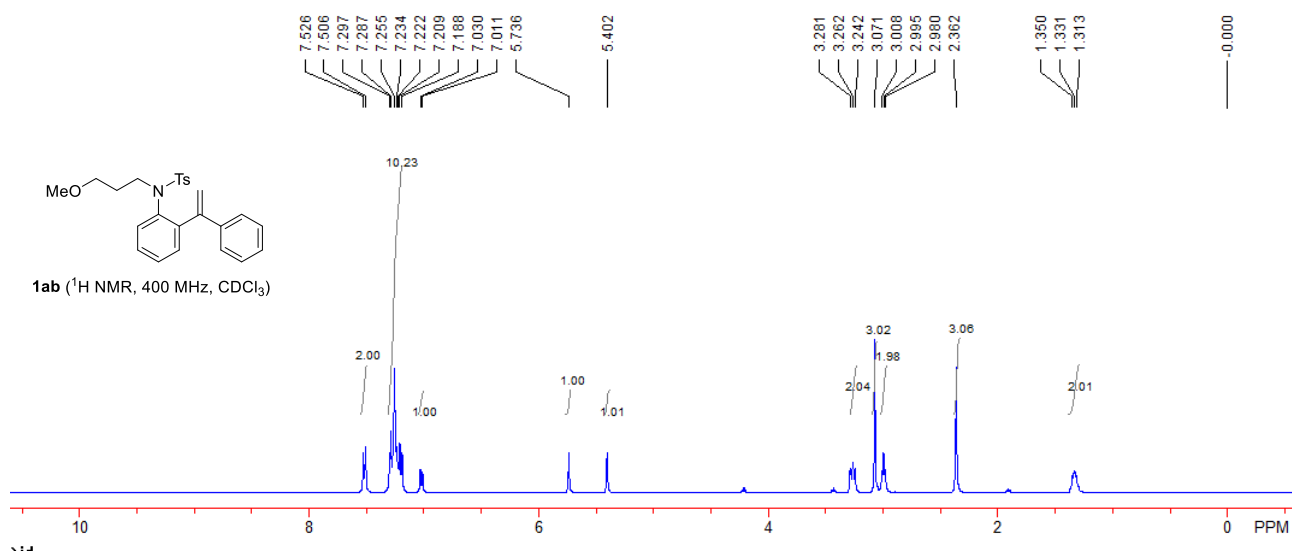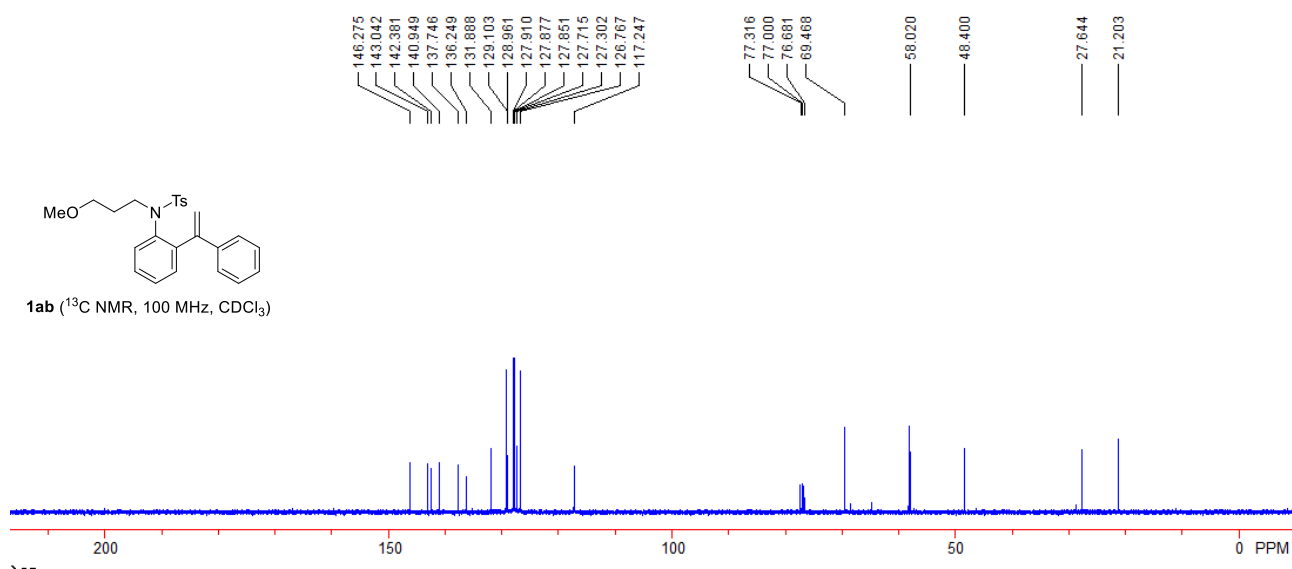

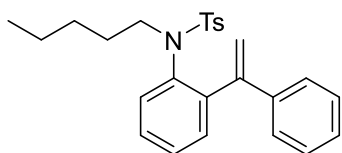

**Compound 1ac:** Yield: 1157 mg, 92%; a light yellow solid; Mp: 84-86 °C; Eluent: PE/EA = 10/1.  $^1\text{H}$  NMR (400 MHz,  $\text{CDCl}_3$ , TMS)  $\delta$  0.70 (t,  $J = 7.2$  Hz, 3H), 0.83-0.92 (m, 2H), 0.96-1.08 (m, 4H), 2.41 (s, 3H), 3.05-3.12 (m, 2H), 5.38 (s, 1H), 5.73 (s, 1H), 7.02 (d,  $J = 7.6$  Hz, 1H), 7.21-7.35 (m, 10H), 7.35 (d,  $J = 8.0$  Hz, 2H);  $^{13}\text{C}\{^1\text{H}\}$ -NMR (101 MHz,  $\text{CDCl}_3$ , TMS)  $\delta_{\text{C}}$  13.8, 21.5, 22.0, 27.3, 28.8, 51.2, 117.5, 127.0, 127.5, 127.87, 127.96, 128.03, 128.08, 129.3, 132.1, 137.9, 141.2, 142.7, 143.1, 146.5; IR (neat):  $\nu$  3320, 3061, 2921, 1597, 1450, 1330, 1264, 1164, 1090, 1027, 873, 784, 703  $\text{cm}^{-1}$ ; HRMS (ESI-TOF) Calcd for  $\text{C}_{26}\text{H}_{29}\text{NO}_2\text{NaS}$   $[\text{M}+\text{Na}]^+$ : 442.1811, found: 442.1811.

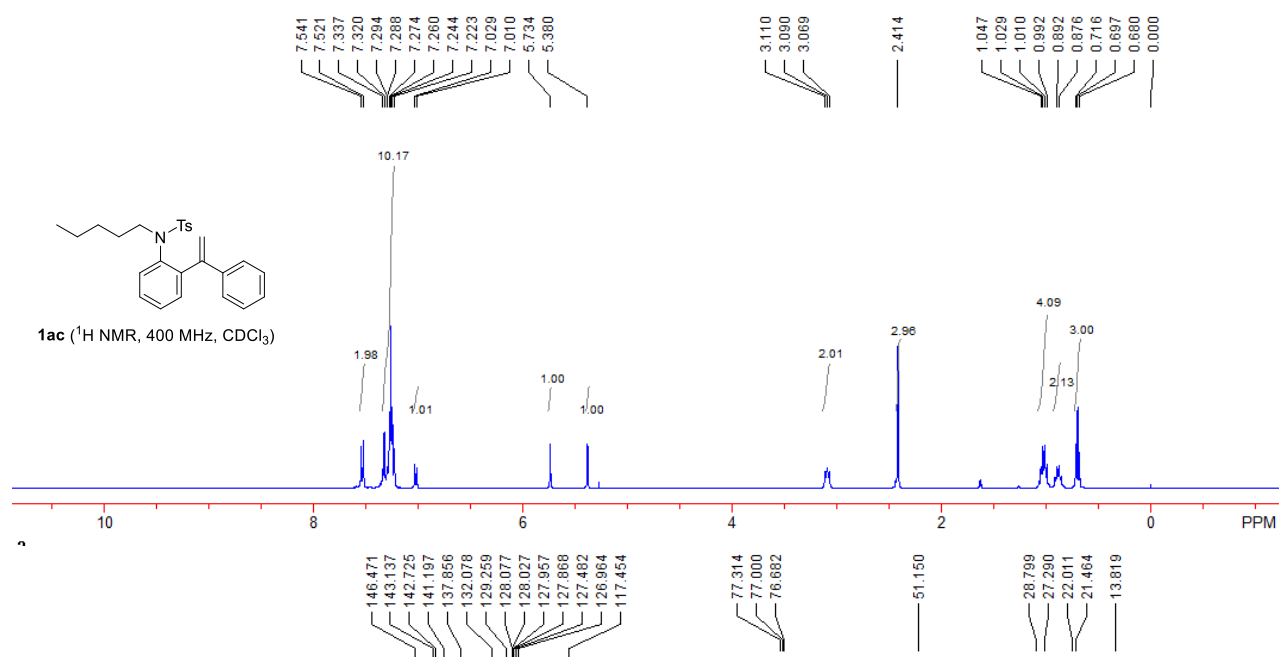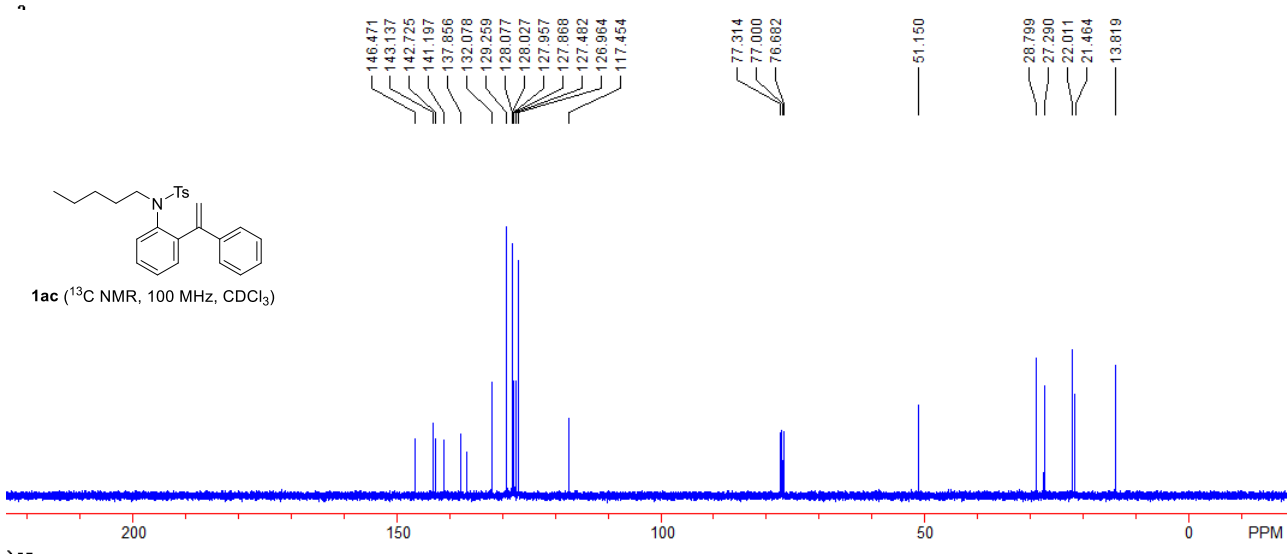

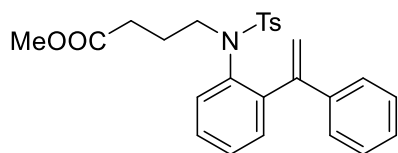

**Compound 1ad:** Yield: 1199 mg, 89%; a yellow oil; Eluent: PE/EA = 10/1.  $^1\text{H}$  NMR (400 MHz,  $\text{CDCl}_3$ , TMS)  $\delta$  1.34-1.44 (m, 2H), 1.96 (t,  $J = 6.4$  Hz, 2H), 2.40 (s, 3H), 3.18 (t,  $J = 6.8$  Hz, 2H), 3.54 (s, 3H), 5.38 (s, 1H), 5.75 (s, 1H), 7.03 (d,  $J = 7.6$  Hz, 1H), 7.20-7.35 (m, 10H), 7.51 (d,  $J = 8.4$  Hz, 2H);  $^{13}\text{C}\{^1\text{H}\}$ -NMR (101 MHz,  $\text{CDCl}_3$ , TMS)  $\delta_{\text{C}}$  21.4, 22.8, 30.7, 50.3, 51.3, 117.4, 126.8, 127.4, 128.0, 128.1, 129.2, 129.3, 132.1, 136.3, 137.6, 140.9, 142.5, 143.3, 146.2, 172.8; IR (neat):  $\nu$  2950, 1733, 1596, 1486, 1438, 1344, 1304, 1154, 1088, 911, 815, 732  $\text{cm}^{-1}$ ; HRMS (ESI-TOF) Calcd for  $\text{C}_{26}\text{H}_{27}\text{NO}_4\text{NaS}$   $[\text{M}+\text{Na}]^+$ : 472.1553, found: 472.1553.

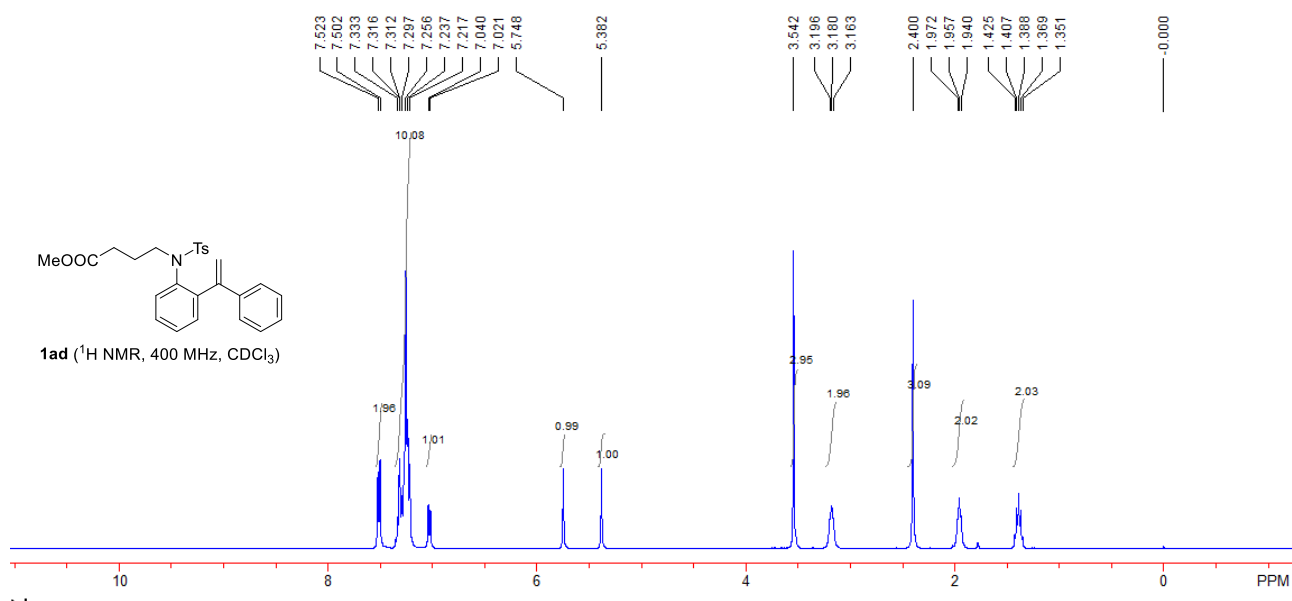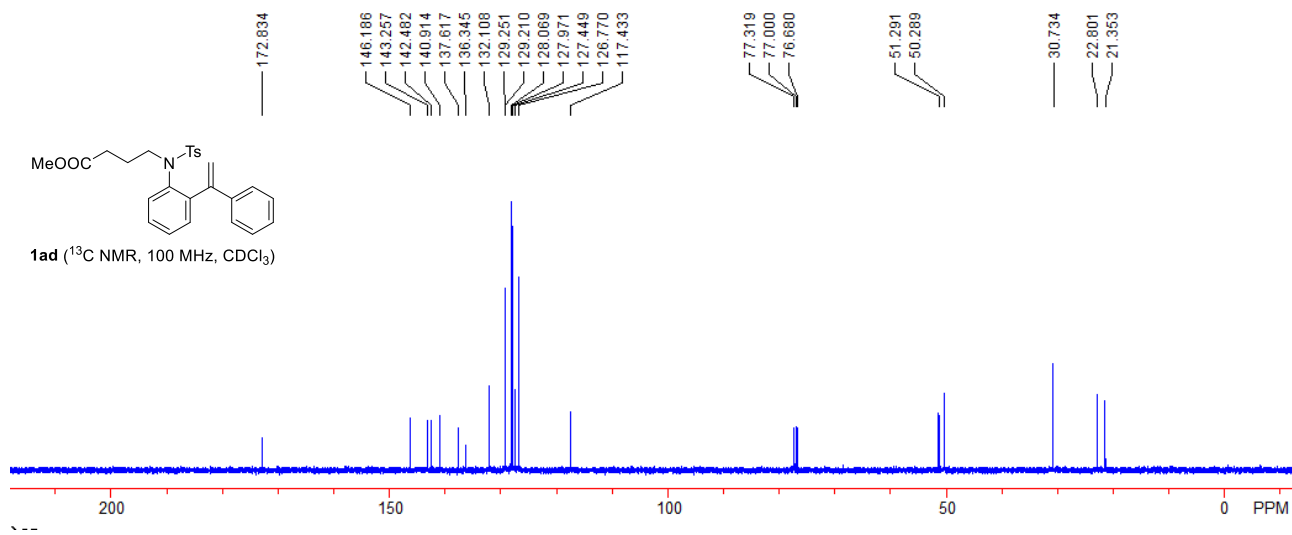

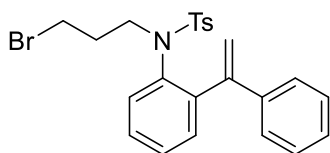

**Compound 1ae:** Yield: 999 mg, 71%; a yellow oil; Eluent: PE/EA = 10/1.  $^1\text{H}$  NMR (400 MHz,  $\text{CDCl}_3$ , TMS)  $\delta$  1.45-1.65 (m, 2H), 2.42 (s, 3H), 3.00 (t,  $J = 6.0$  Hz, 2H), 3.20-3.30 (m, 2H), 5.37 (s, 1H), 5.75 (s, 1H), 7.00 (d,  $J = 7.2$  Hz, 1H), 7.21-7.30 (m, 8H), 7.32-7.37 (m, 2H), 7.50 (d,  $J = 8.0$  Hz, 2H);  $^{13}\text{C}\{^1\text{H}\}$ -NMR (101 MHz,  $\text{CDCl}_3$ , TMS)  $\delta_{\text{C}}$  21.5, 30.5, 30.6, 50.1, 117.7, 126.8, 127.6, 128.19, 128.25, 128.27, 128.9, 129.4, 132.3, 135.8, 138.0, 141.1, 142.6, 143.5, 146.5; IR (neat):  $\nu$  3056, 2969, 1596, 1485, 1444, 1379, 1290, 1153, 1088, 1055, 906, 814, 765, 705  $\text{cm}^{-1}$ ; HRMS (ESI-TOF) Calcd for  $\text{C}_{24}\text{H}_{24}\text{NO}_2\text{NaSBr}$   $[\text{M}+\text{Na}]^+$ : 492.0603, found: 492.0611.

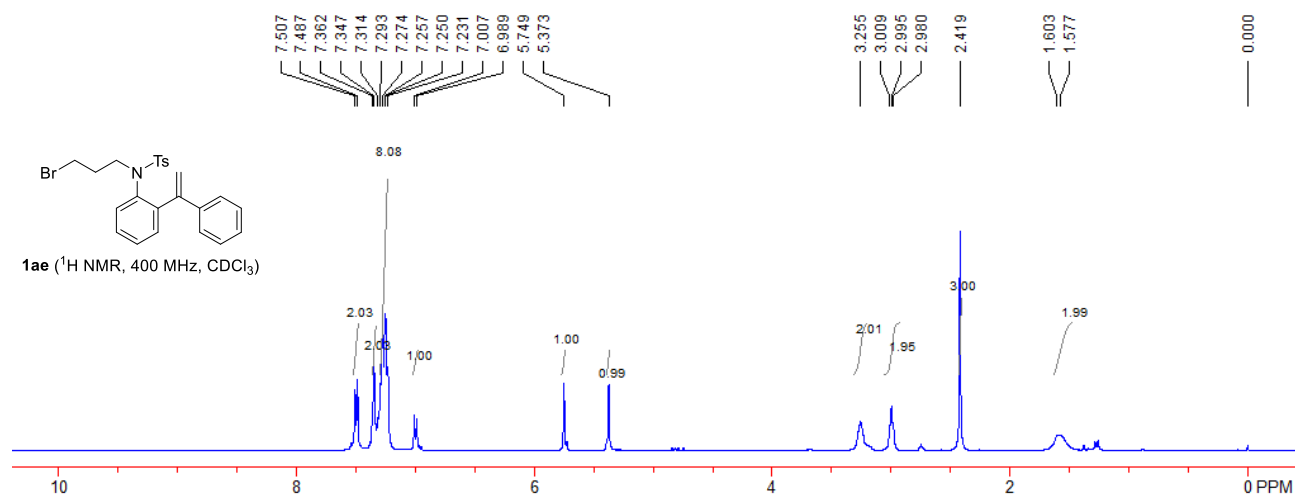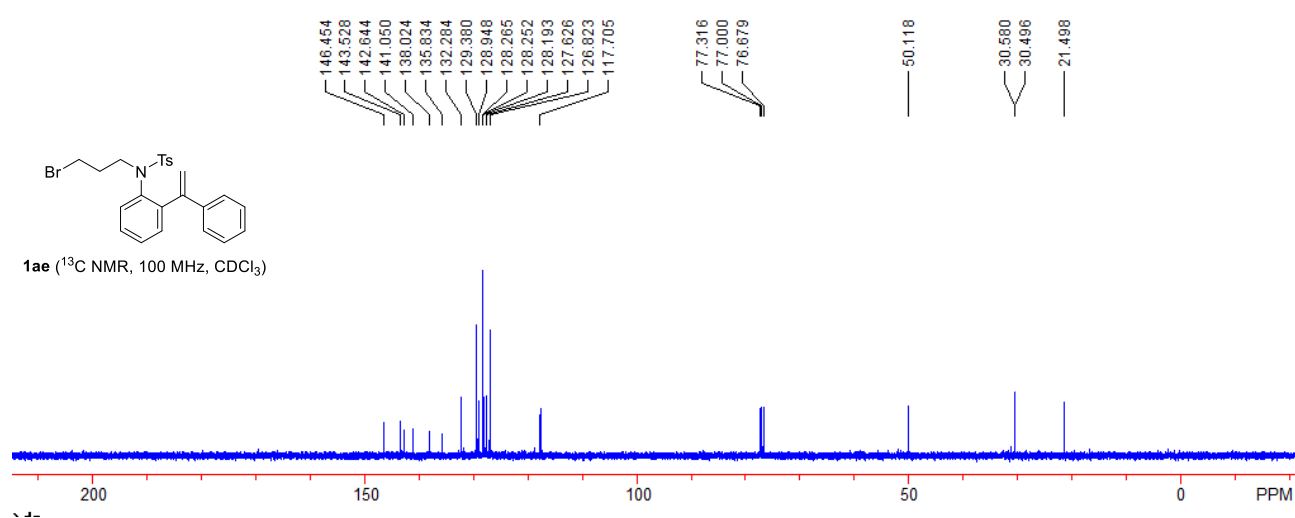

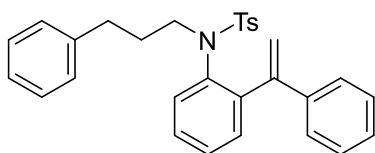

**Compound 1af:** Yield: 1177 mg, 84%; a yellow oil; Eluent: PE/EA = 10/1.  $^1\text{H}$  NMR (400 MHz,  $\text{CDCl}_3$ , TMS)  $\delta$  1.30-1.45 (m, 2H), 2.22 (t,  $J = 8.0$  Hz, 2H), 2.34 (s, 3H), 3.14 (t,  $J = 8.0$  Hz, 2H), 5.36 (s, 1H), 5.71 (s, 1H), 6.87 (d,  $J = 7.2$  Hz, 2H), 7.02 (d,  $J = 8.0$  Hz, 1H), 7.07-7.30 (m, 13H), 7.46 (d,  $J = 8.4$  Hz, 2H);  $^{13}\text{C}\{^1\text{H}\}$ -NMR (101 MHz,  $\text{CDCl}_3$ , TMS)  $\delta_{\text{C}}$  21.3, 28.9, 32.6, 50.5, 117.3, 125.6, 126.7, 127.4, 127.8, 127.90, 127.98, 127.99, 129.11, 129.15, 131.9, 136.4, 137.7, 140.7, 140.9, 142.4, 143.0, 146.3; IR (neat):  $\nu$  3058, 3025, 2923, 2859, 1596, 1493, 1444, 1378, 1153, 1089, 1028, 909, 814, 767, 732  $\text{cm}^{-1}$ ; HRMS (ESI-TOF) Calcd for  $\text{C}_{30}\text{H}_{29}\text{NO}_2\text{NaS}$   $[\text{M}+\text{Na}]^+$ : 490.1811, found: 490.1817.

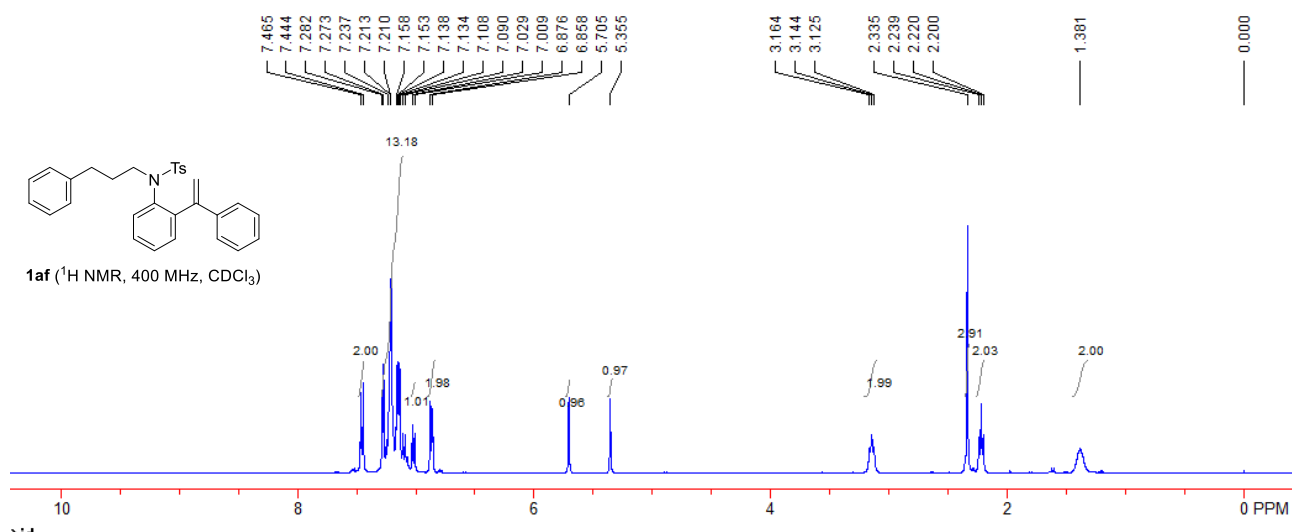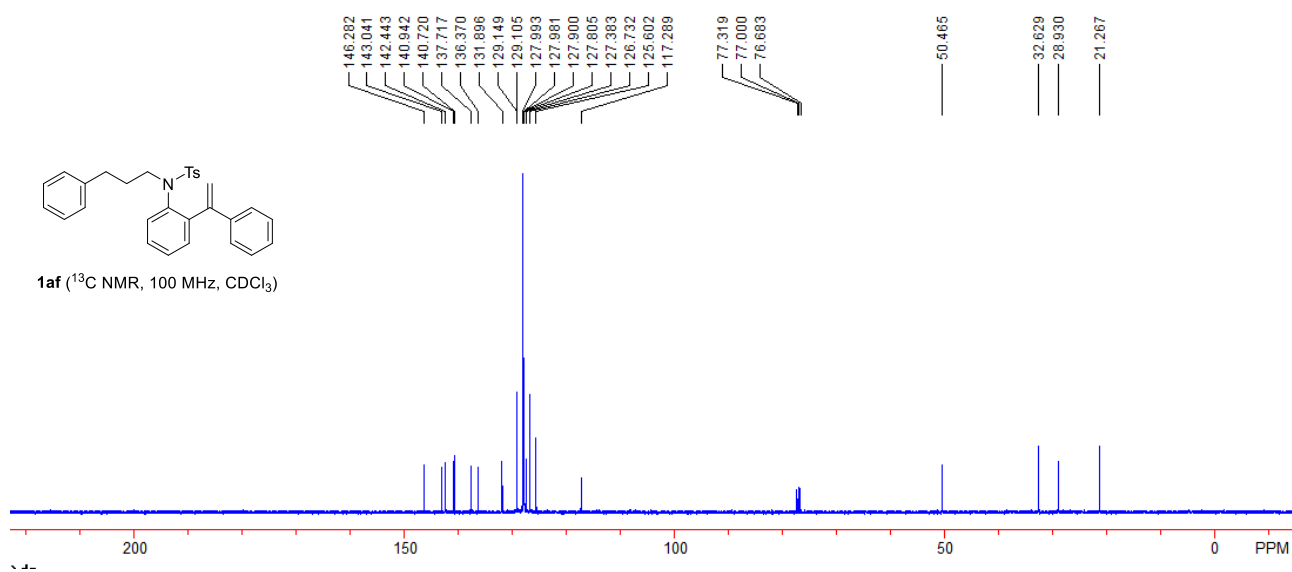

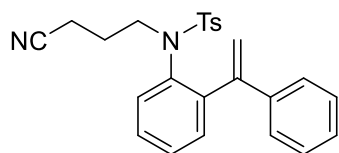

**Compound 1ag:** Yield: 1124 mg, 90%; a yellow oil; Eluent: PE/EA = 5/1.  $^1\text{H}$  NMR (400 MHz,  $\text{CDCl}_3$ , TMS)  $\delta$  1.15-1.45 (m, 2H), 1.80-2.00 (m, 2H), 2.38 (s, 3H), 3.00-3.40 (m, 2H), 5.37 (s, 1H), 5.75 (s, 1H), 6.93 (d,  $J = 7.6$  Hz, 1H), 7.19-7.30 (m, 8H), 7.31-7.37 (m, 2H), 7.47 (d,  $J = 8.0$  Hz, 2H);  $^{13}\text{C}\{^1\text{H}\}$ -NMR (101 MHz,  $\text{CDCl}_3$ , TMS)  $\delta_{\text{C}}$  14.1, 21.2, 23.6, 50.0, 117.5, 118.6, 126.4, 127.5, 127.9, 128.08, 128.11, 128.16, 128.4, 129.2, 132.1, 135.1, 137.7, 140.7, 142.4, 143.5, 146.1; IR (neat):  $\nu$  3055, 2924, 1596, 1486, 1444, 1346, 1156, 1089, 912, 815, 732  $\text{cm}^{-1}$ ; HRMS (ESI-TOF) Calcd for  $\text{C}_{25}\text{H}_{24}\text{N}_2\text{O}_2\text{NaS}$   $[\text{M}+\text{Na}]^+$ : 439.1451, found: 439.1443.

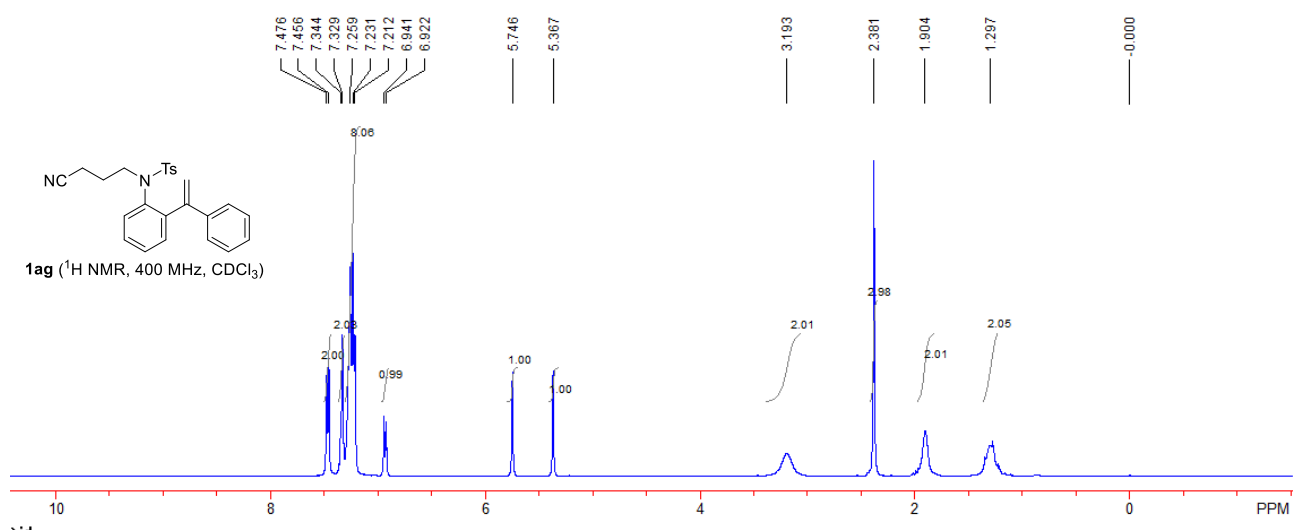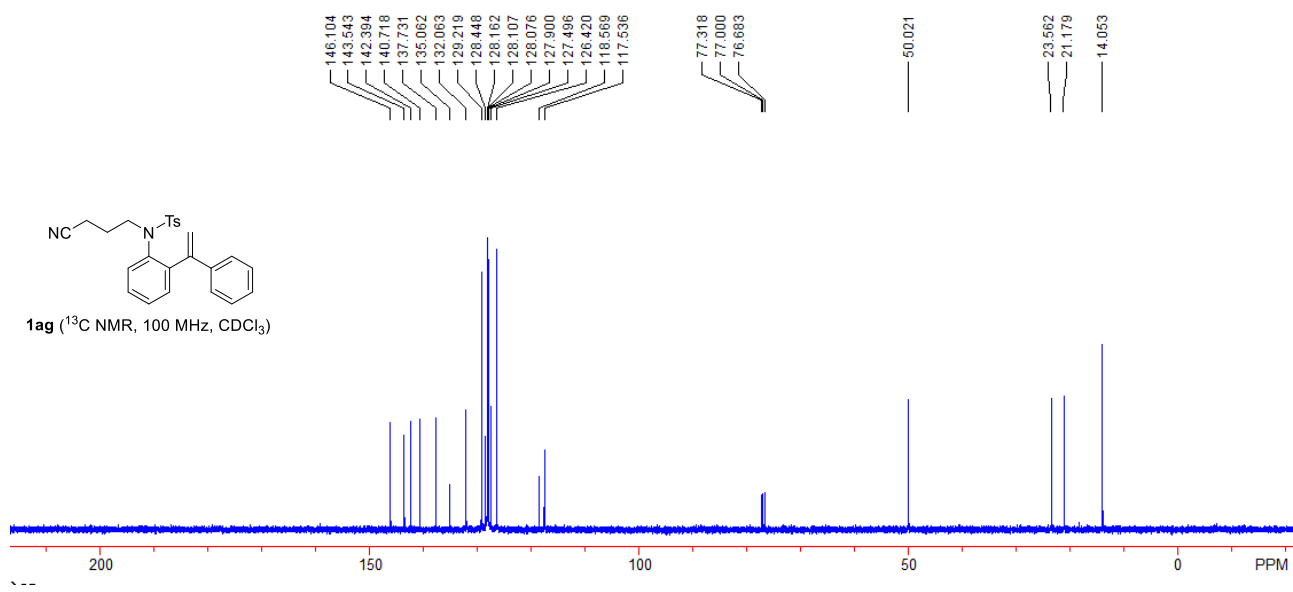

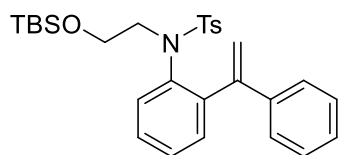

**Compound 1ah:** Yield: 1248 mg, 82%; a light yellow solid; Mp: 107-109 °C; Eluent: PE/EA = 10/1.

$^1\text{H}$  NMR (400 MHz,  $\text{CDCl}_3$ , TMS)  $\delta$  -0.15 (s, 6H), 0.74 (s, 9H), 2.39 (s, 3H), 3.00-3.40 (m, 4H), 5.41 (s, 1H), 5.72 (s, 1H), 7.03 (d,  $J$  = 7.2 Hz, 1H), 7.22 (d,  $J$  = 8.0 Hz, 2H), 7.23-7.30 (m, 6H), 7.31 (d,  $J$  = 8.0 Hz, 2H), 7.54 (d,  $J$  = 8.0 Hz, 2H);  $^{13}\text{C}\{^1\text{H}\}$ -NMR (101 MHz,  $\text{CDCl}_3$ , TMS)  $\delta_{\text{C}}$  -5.6, 17.9, 21.3, 25.6, 52.6, 60.1, 117.7, 126.9, 127.5, 127.92, 127.97, 128.0, 128.1, 129.19, 129.21, 131.9, 136.4, 138.1, 141.2, 142.5, 143.2, 146.5; IR (neat):  $\nu$  2954, 2925, 2882, 2852, 1596, 1492, 1443, 1303, 1273, 1213, 1166, 1071, 1036, 950, 832, 774, 705  $\text{cm}^{-1}$ ; HRMS (ESI-TOF) Calcd for  $\text{C}_{29}\text{H}_{37}\text{NO}_3\text{NaSiS}$   $[\text{M}+\text{Na}]^+$ : 530.2156, found: 530.2151.

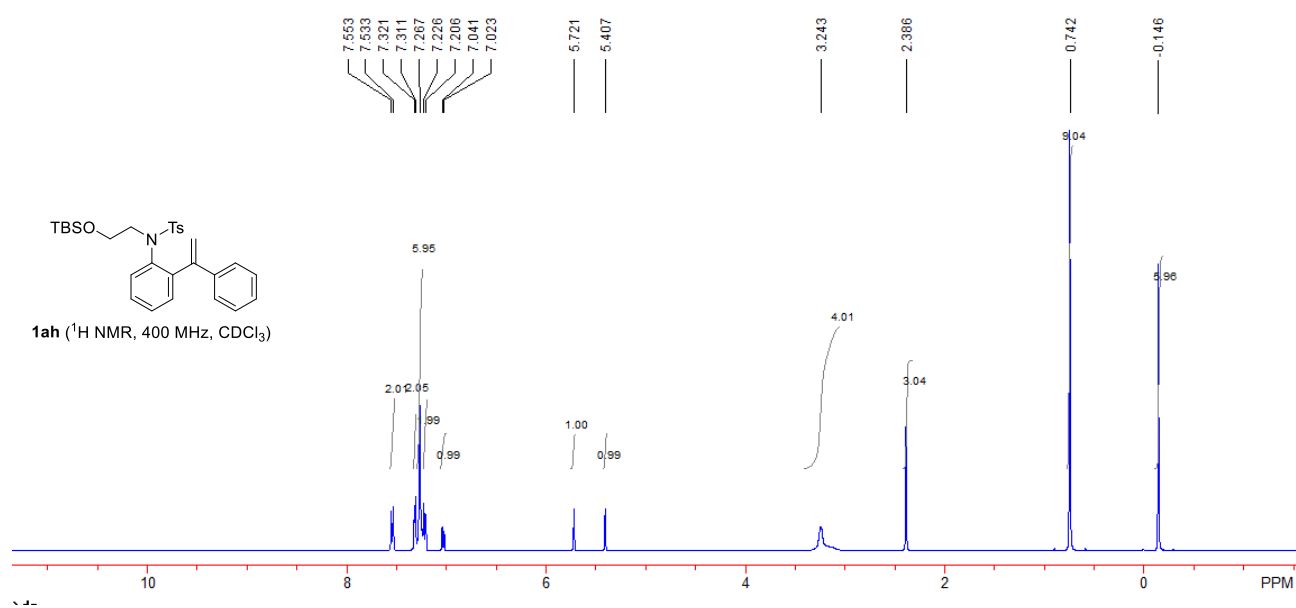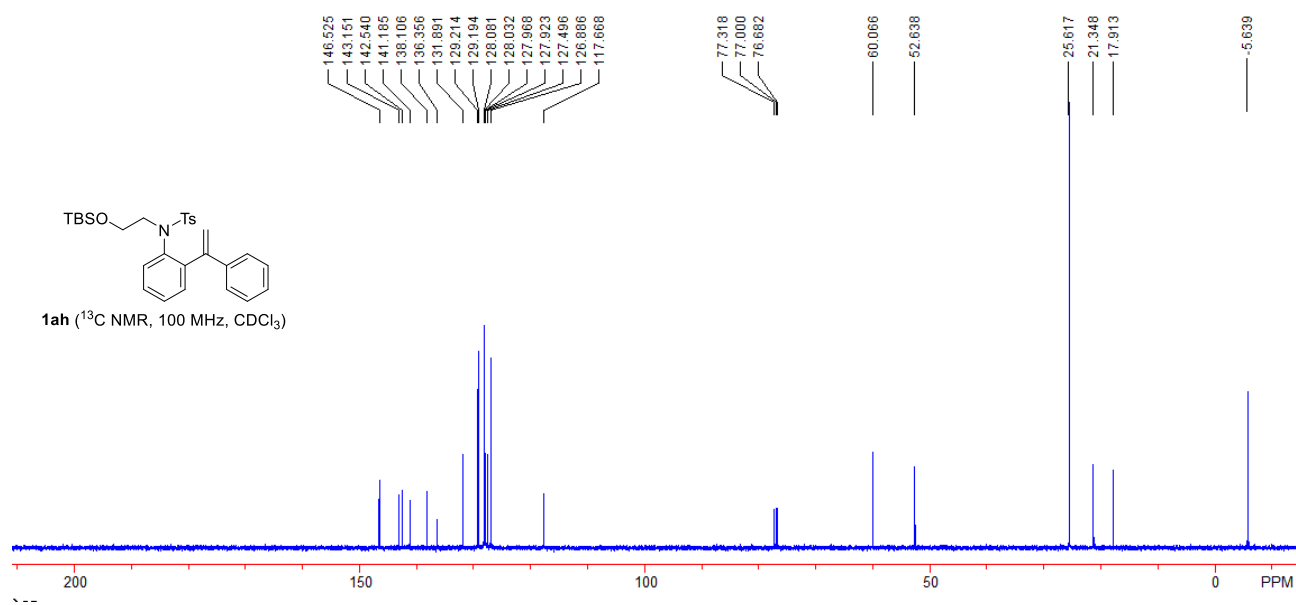

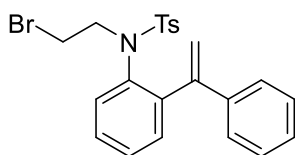

**Compound 1ai:** Yield: 1038 mg, 76%; a light yellow solid; Mp: 114-116 °C; Eluent: PE/EA = 10/1. <sup>1</sup>H NMR (400 MHz, CDCl<sub>3</sub>, TMS) δ 2.38 (s, 3H), 2.50-3.20 (m, 2H), 3.32-3.48 (m, 2H), 5.32 (s, 1H), 5.69 (s, 1H), 6.90 (d, *J* = 7.6 Hz, 1H), 7.18-7.30 (m, 8H), 7.31-7.37 (m, 2H), 7.47 (d, *J* = 8.0 Hz, 2H); <sup>13</sup>C{<sup>1</sup>H}-NMR (101 MHz, CDCl<sub>3</sub>, TMS) δ<sub>C</sub> 21.4, 27.7, 52.8, 117.6, 126.6, 127.6, 128.0, 128.2, 128.3, 128.4, 128.9, 129.3, 132.1, 135.1, 137.9, 141.1, 142.6, 143.7, 146.6; IR (neat): ν 3063, 2971, 2917, 1595, 1492, 1444, 1355, 1304, 1233, 1156, 1083, 972, 876, 773, 707 cm<sup>-1</sup>; HRMS (EI-TOF) Calcd for C<sub>23</sub>H<sub>22</sub>NO<sub>2</sub>SBr [M]<sup>+</sup>: 455.0549, found: 455.0553.

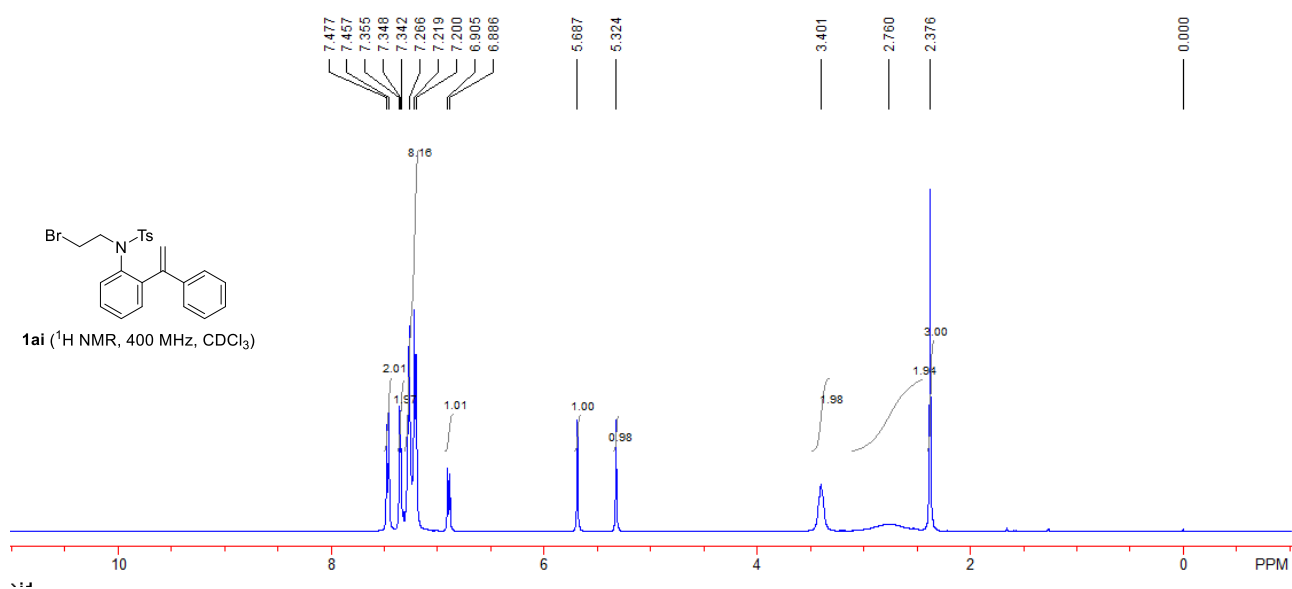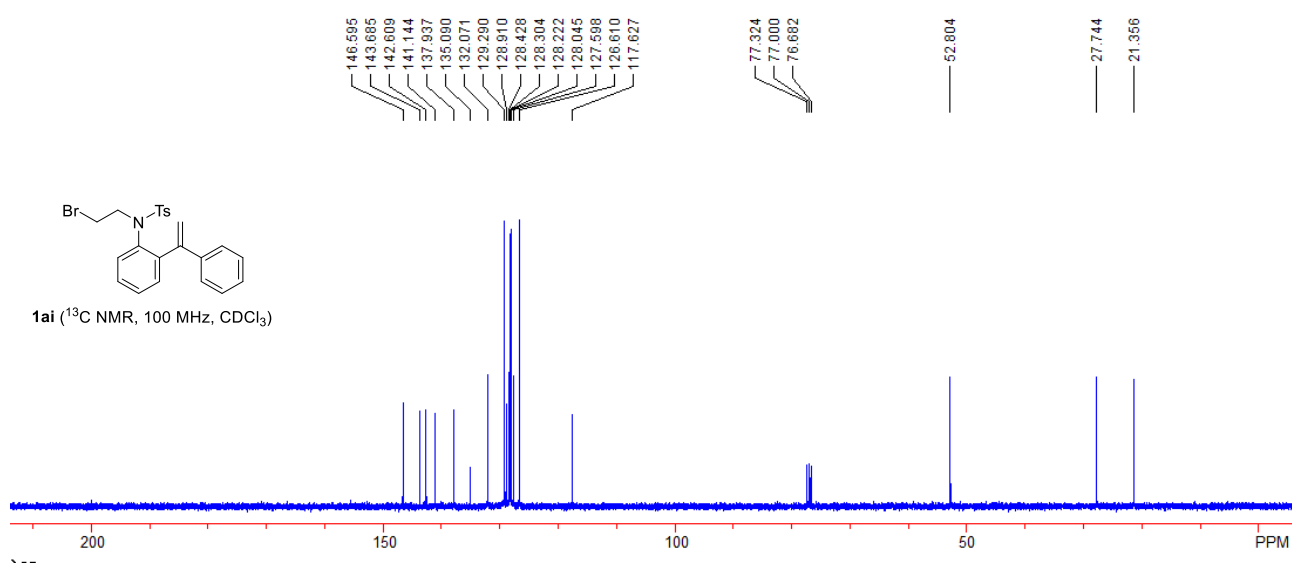

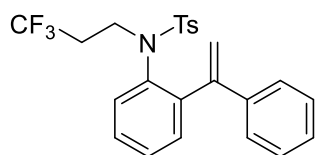

**Compound 1aj:** Yield: 1028 mg, 77%; a light yellow solid; Mp: 104-106 °C; Eluent: PE/EA = 10/1.

$^1\text{H}$  NMR (400 MHz,  $\text{CDCl}_3$ , TMS)  $\delta$  1.30-2.20 (m, 2H), 2.39 (s, 3H), 3.00-3.50 (m, 2H), 5.35 (s, 1H), 5.71 (s, 1H), 6.83 (d,  $J = 8.0$  Hz, 1H), 7.20-7.32 (m, 8H), 7.35-7.49 (m, 4H);  $^{13}\text{C}\{^1\text{H}\}$ -NMR (101 MHz,  $\text{CDCl}_3$ , TMS)  $\delta_{\text{C}}$  21.4, 32.3 (q,  $J = 27.6$  Hz), 45.0 (q,  $J = 4.5$  Hz), 117.7, 125.4 (q,  $J = 274.7$  Hz), 126.7, 127.6, 128.2, 128.33, 128.38, 128.45, 128.6, 129.4, 132.2, 134.5, 138.3, 141.5, 143.0, 143.9, 147.0;  $^{19}\text{F}$  NMR (376 MHz,  $\text{CDCl}_3$ )  $\delta$  -65.9; IR (neat):  $\nu$  3094, 3001, 2941, 1597, 1487, 1445, 1392, 1306, 1259, 1238, 1184, 1115, 1074, 981, 787, 711  $\text{cm}^{-1}$ ; HRMS (ESI-TOF) Calcd for  $\text{C}_{24}\text{H}_{22}\text{NO}_2\text{F}_3\text{NaS}$   $[\text{M}+\text{Na}]^+$ : 468.1216, found: 468.1221.

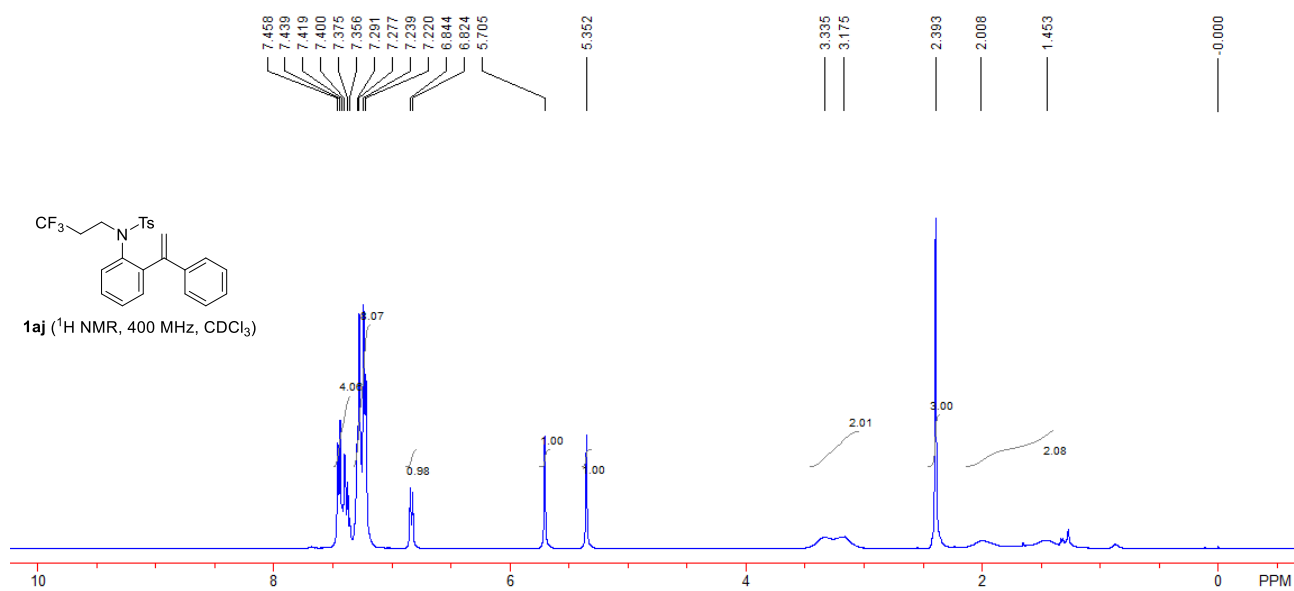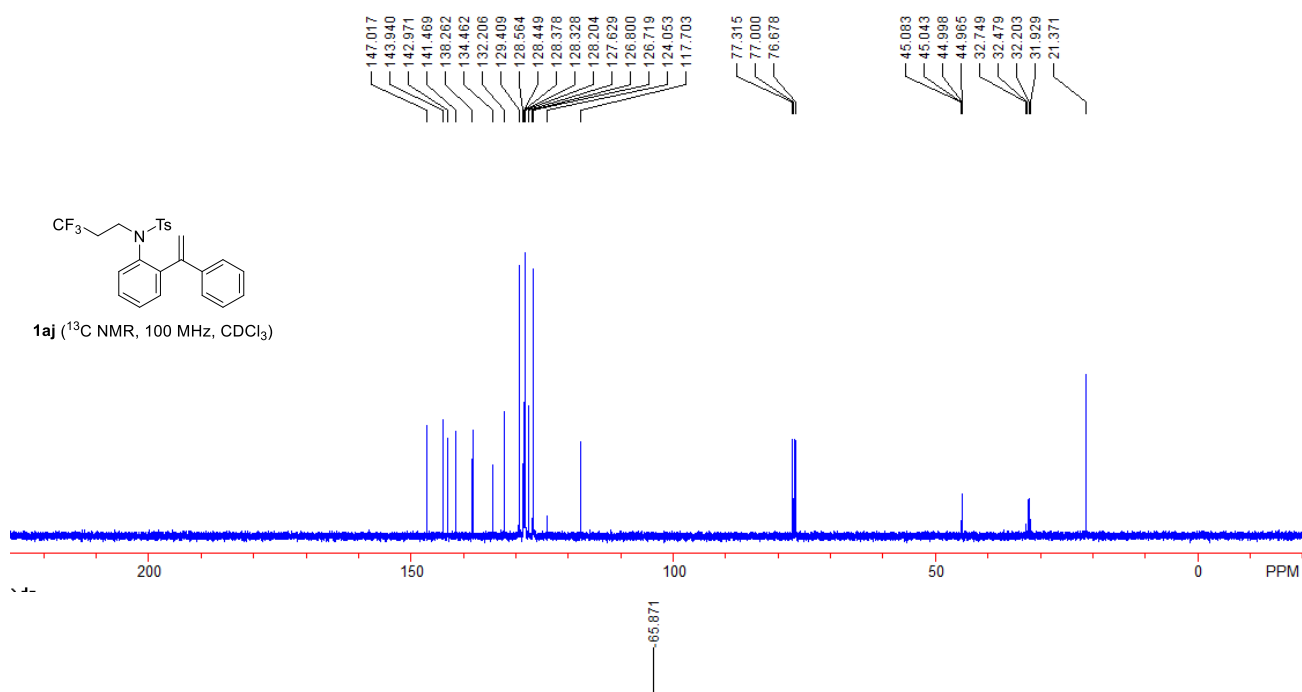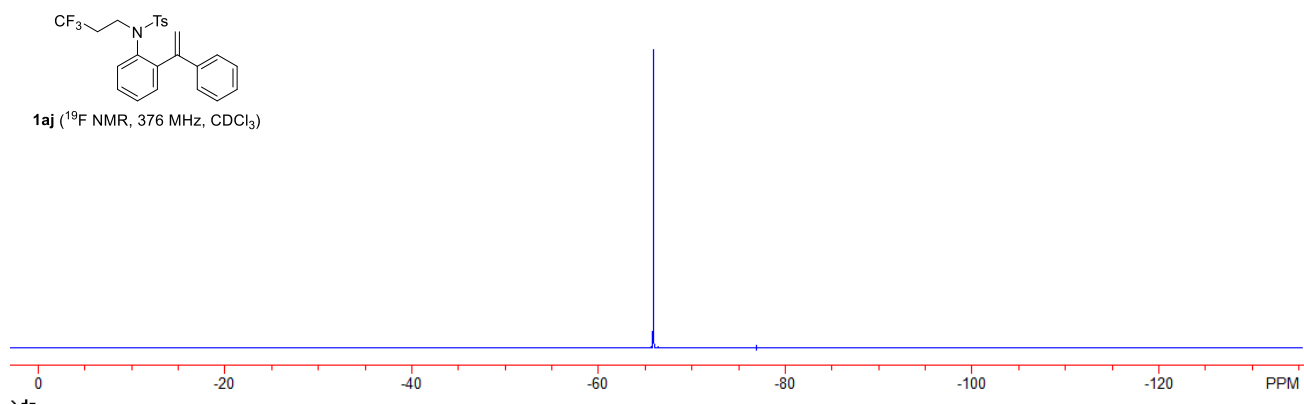

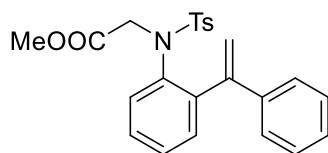

**Compound 1ak:** Yield: 1150 mg, 91%; a light yellow solid; Mp: 96-98 °C; Eluent: PE/EA = 5/1.  $^1\text{H}$  NMR (400 MHz,  $\text{CDCl}_3$ , TMS)  $\delta$  2.41 (s, 3H), 3.48 (s, 3H), 3.75-3.95 (m, 2H), 5.25 (s, 1H), 5.62 (s, 1H), 7.15-7.40 (m, 10H), 7.48 (d,  $J$  = 7.6 Hz, 1H), 7.57 (d,  $J$  = 8.4 Hz, 2H);  $^{13}\text{C}\{^1\text{H}\}$ -NMR (101 MHz,  $\text{CDCl}_3$ , TMS)  $\delta_{\text{C}}$  21.5, 51.5, 51.8, 117.5, 126.9, 127.8, 127.9, 128.3, 128.6, 129.1, 131.3, 131.7, 137.5, 137.6, 140.8, 142.1, 143.3, 146.3, 169.4; IR (neat):  $\nu$  2983, 2953, 2928, 1750, 1594, 1445, 1346, 1238, 1163, 1089, 1023, 909, 786, 701  $\text{cm}^{-1}$ ; HRMS (ESI-TOF) Calcd for  $\text{C}_{24}\text{H}_{23}\text{NO}_4\text{NaS}$   $[\text{M}+\text{Na}]^+$ : 444.1240, found: 444.1239.

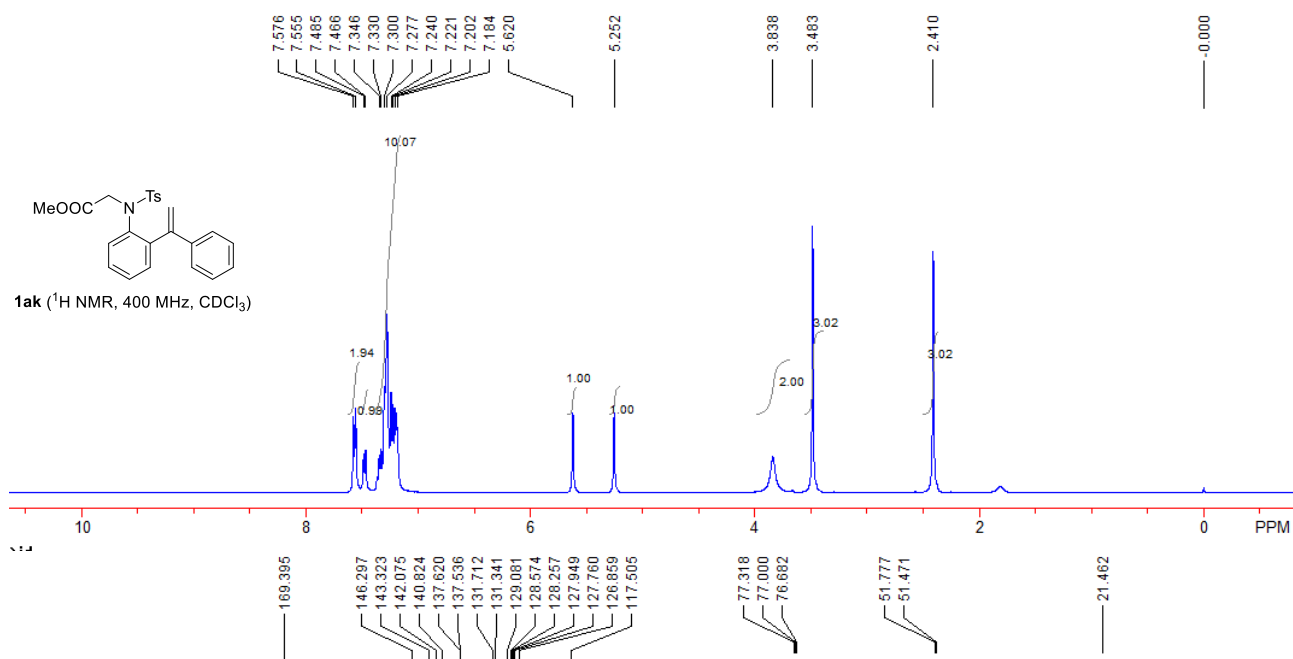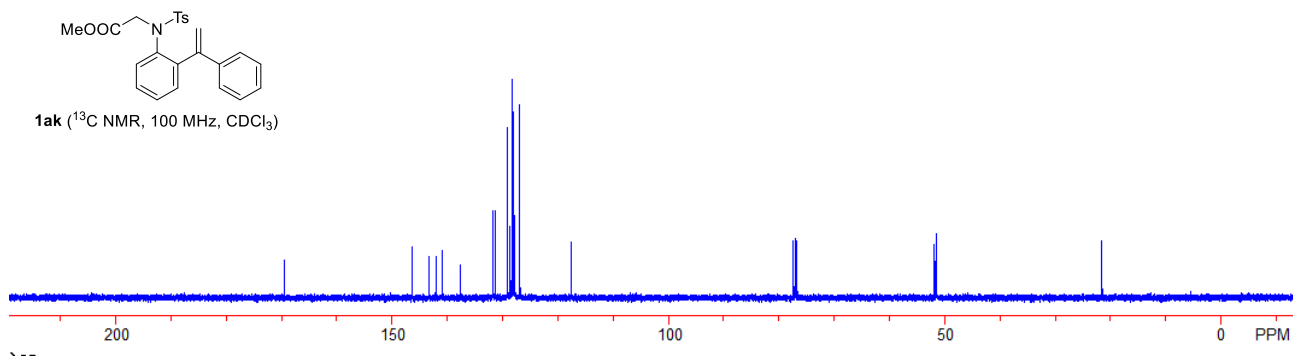

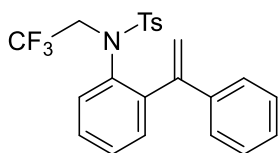

**Compound 1al:** Yield: 1086 mg, 84%; a light yellow solid; Mp: 90-92 °C; Eluent: PE/EA = 10/1.  $^1\text{H}$  NMR (400 MHz,  $\text{CDCl}_3$ , TMS)  $\delta$  2.39 (s, 3H), 3.30-3.50 (m, 1H), 4.25-4.45 (m, 1H), 5.33 (s, 1H), 5.74 (s, 1H), 7.18-7.25 (m, 8H), 7.27-7.35 (m, 3H), 7.63 (d,  $J$  = 8.0 Hz, 2H);  $^{13}\text{C}\{^1\text{H}\}$ -NMR (101 MHz,  $\text{CDCl}_3$ , TMS)  $\delta_{\text{C}}$  21.4, 50.1 (q,  $J$  = 33.8 Hz), 117.6, 123.9 (q,  $J$  = 279.5 Hz), 126.7, 127.93, 127.98, 128.2, 128.4, 128.7, 129.4, 130.80, 130.85, 132.1, 136.4, 137.4, 140.2, 141.0, 143.9, 145.0;  $^{19}\text{F}$  NMR (376 MHz,  $\text{CDCl}_3$ )  $\delta$  -68.5; IR (neat):  $\nu$  3094, 3001, 2941, 1620, 1597, 1445, 1353, 1259, 1184, 1115, 1087, 1040, 981, 827, 768, 711  $\text{cm}^{-1}$ ; HRMS (ESI-TOF) Calcd for  $\text{C}_{23}\text{H}_{20}\text{NO}_2\text{F}_3\text{NaS}$   $[\text{M}+\text{Na}]^+$ : 454.1059, found: 454.1065.

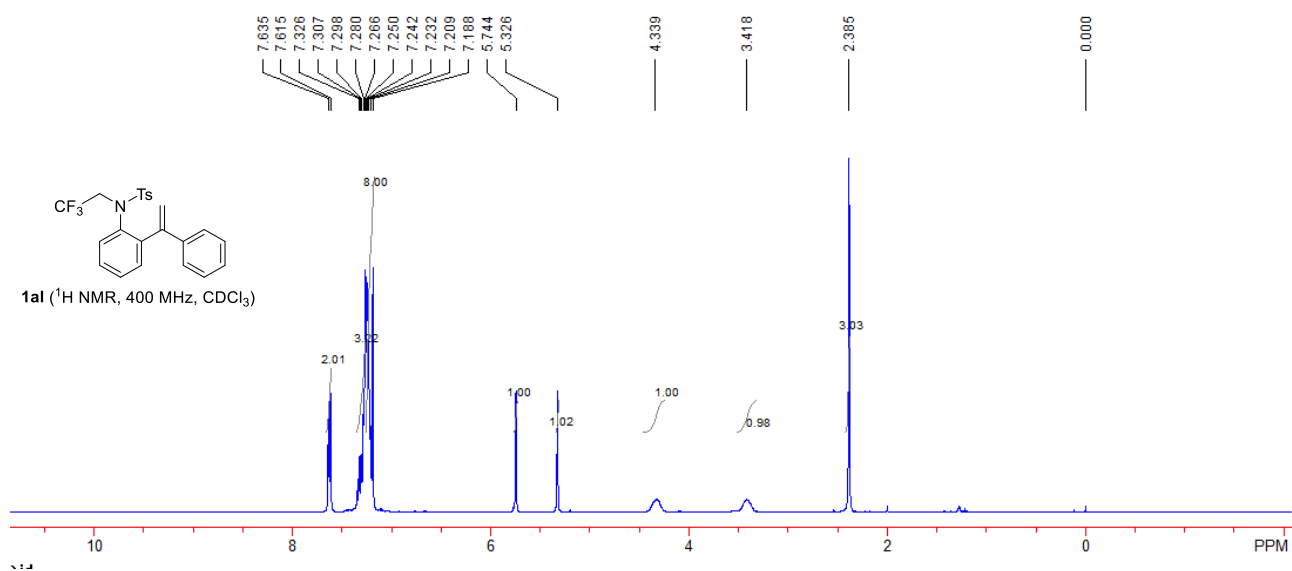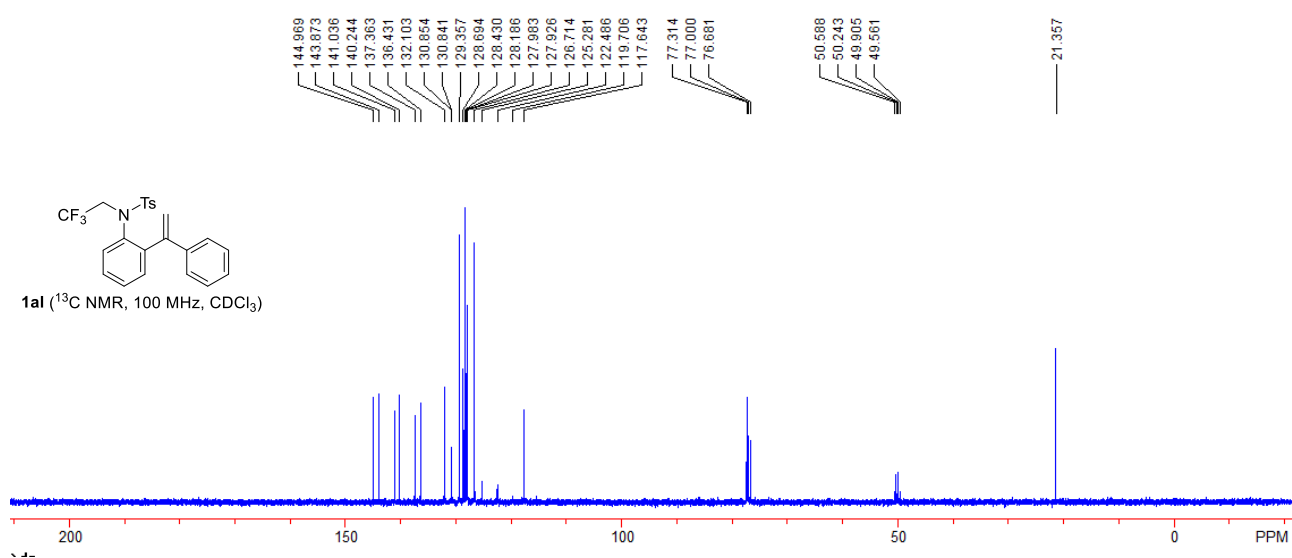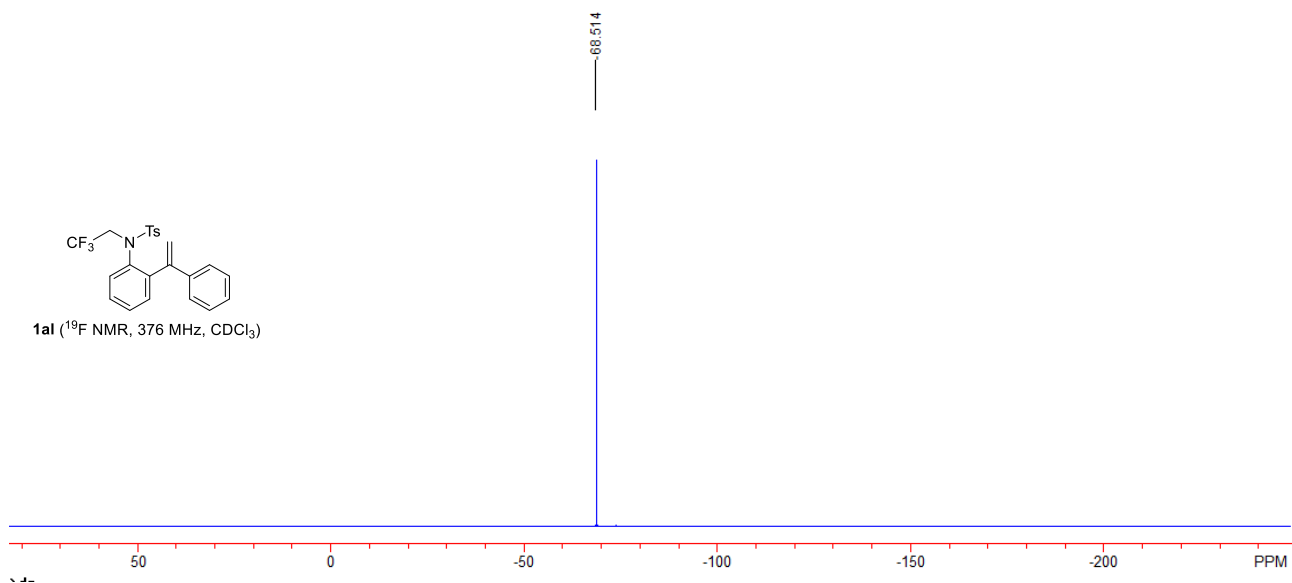

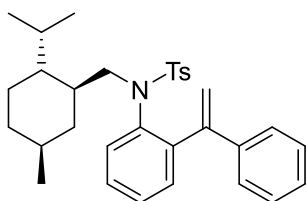

**Compound 1am:** Yield: 1428 mg, 70%; a light yellow solid; Mp: 147-149 °C; Eluent: PE/EA = 10/1.  $^1\text{H}$  NMR (400 MHz,  $\text{CDCl}_3$ , TMS)  $\delta$  0.05-0.20 (m, 1.33H), 0.25-0.45 (m, 5.33H), 0.52-0.76 (m, 11.97H), 0.85-1.00 (m, 0.33H), 1.14-1.19 (m, 1.33H), 1.32-1.55 (m, 3.33H), 1.56-1.70 (m, 1.00H), 1.84 (d,  $J = 12.4$  Hz, 1.00H), 2.35-2.46 (m, 3.99H), 2.90-3.06 (m, 1.33H), 3.32-3.45 (m, 1.33H), 5.40 (s, 0.33H), 5.69 (s, 1.00H), 5.74 (s, 0.33H), 6.02 (s, 1.00H), 7.11 (d,  $J = 7.6$  Hz, 1.00H), 7.20-7.40 (m, 13.33H), 7.50 (d,  $J = 7.6$  Hz, 2.00H), 7.61 (d,  $J = 7.6$  Hz, 1.00H);  $^{13}\text{C}\{^1\text{H}\}$ -NMR (101 MHz,  $\text{CDCl}_3$ , TMS)  $\delta_{\text{C}}$  14.6, 15.4, 19.9, 21.1, 21.3, 21.4, 22.3, 22.4, 23.77, 23.84, 25.9, 26.2, 31.1, 31.6, 34.61, 34.67, 36.7, 36.8, 39.89, 39.98, 44.6, 45.4, 54.9, 57.1, 117.8, 118.1, 126.7, 126.8, 127.44, 127.49, 127.7, 127.88, 127.95, 128.1, 128.2, 128.5, 128.6, 129.07, 129.13, 129.17, 130.3, 132.5, 135.9, 139.5, 140.4, 140.6, 142.0, 142.5, 143.0, 143.3, 144.9; IR (neat):  $\nu$  2952, 2918, 2867, 1596, 1488, 1444, 1384, 1333, 1186, 1163, 1114, 983, 853, 715  $\text{cm}^{-1}$ ; HRMS (ESI-TOF) Calcd for  $\text{C}_{32}\text{H}_{39}\text{NO}_2\text{NaS}$   $[\text{M}+\text{Na}]^+$ : 524.2594, found: 524.2593.

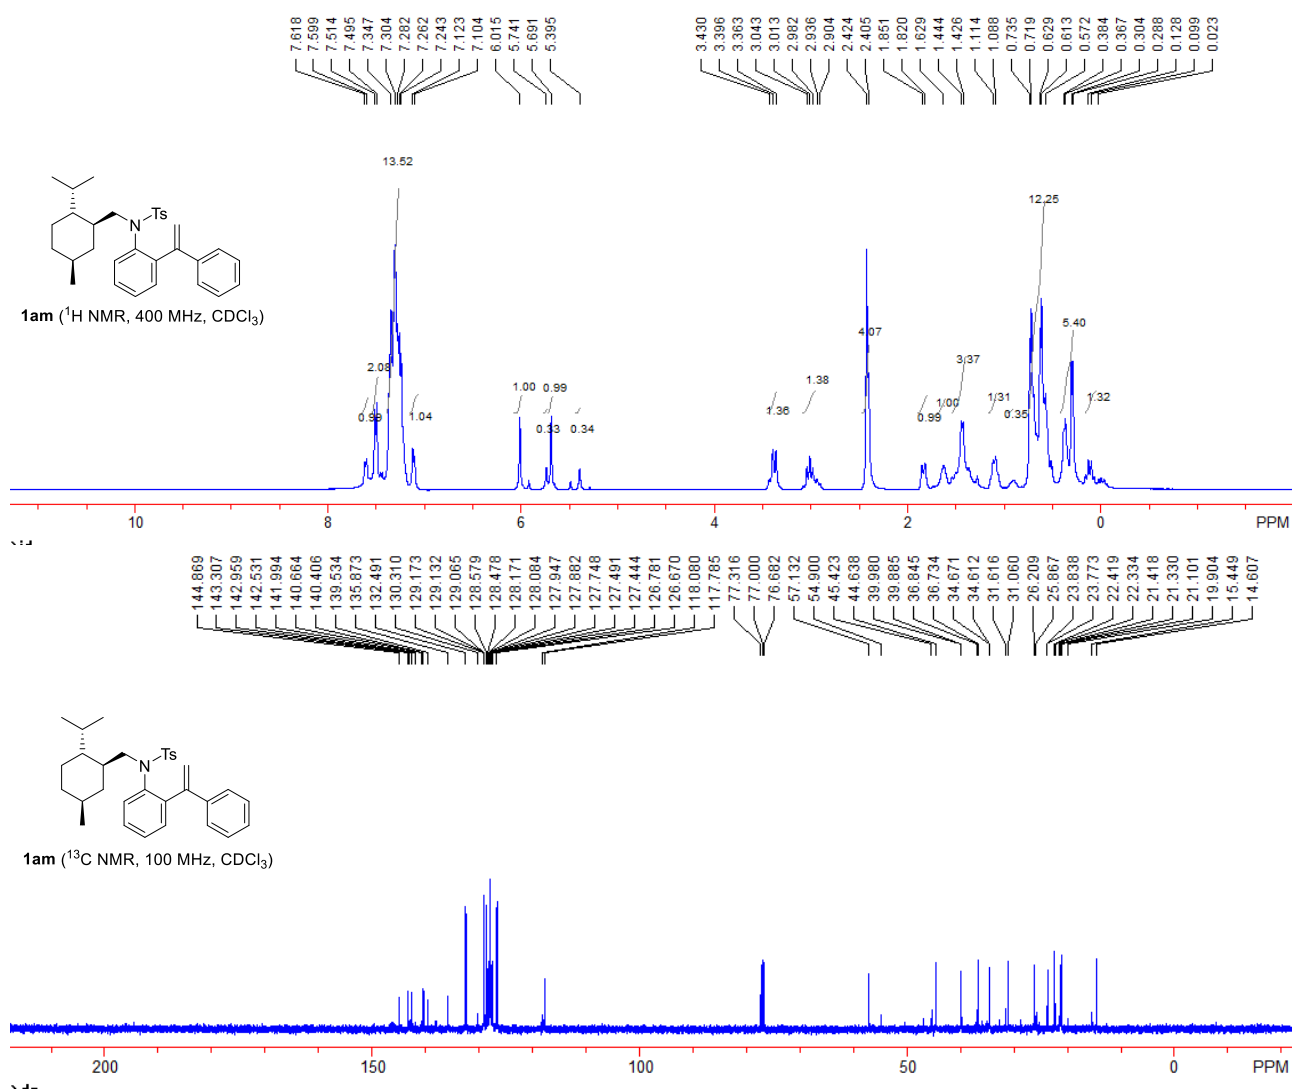

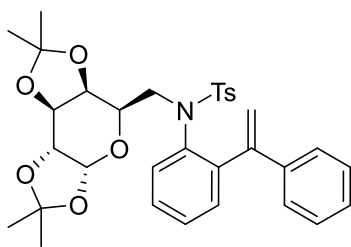

**Compound 1an:** Yield: 2834 mg, 51%; a yellow oil; Eluent: PE/EA = 5/1.  $^1\text{H}$  NMR (400 MHz,  $\text{CDCl}_3$ , TMS)  $\delta$  1.02 (s, 3.00H), 1.15-1.30 (m, 11.20H), 1.36 (s, 3.00H), 2.40 (s, 4.20H), 3.22-3.34 (m, 1.40H), 3.38-3.50 (m, 2.00H), 3.73-4.00 (m, 2.40H), 4.10-4.20 (m, 1.40H), 4.34 (d,  $J = 7.2$  Hz, 1.00H), 4.45 (d,  $J = 7.2$  Hz, 0.40H), 5.14 (d,  $J = 5.2$  Hz, 1.00H), 5.29-5.34 (m, 0.80H), 5.48 (s, 1.00H), 5.65 (s, 0.40H), 5.81 (s, 1.00H), 7.15-7.35 (m, 15.40H), 7.60 (d,  $J = 7.6$  Hz, 0.80H), 7.67 (d,  $J = 8.0$  Hz, 2.00H);  $^{13}\text{C}\{^1\text{H}\}$ -NMR (101 MHz,  $\text{CDCl}_3$ , TMS)  $\delta_{\text{C}}$  21.4, 24.3, 24.7, 24.9, 25.4, 25.6, 25.8, 25.9, 49.5, 50.6, 64.6, 66.7, 69.98, 70.03, 70.5, 71.0, 71.4, 95.9, 96.2, 108.1, 108.4, 108.96, 109.04, 117.0, 117.5, 126.8, 127.2, 127.4, 127.61, 127.64, 127.70, 127.73, 128.00, 128.10, 128.15, 128.18, 128.3, 128.8, 129.3, 130.8, 131.4, 131.7, 136.6, 137.4, 137.8, 140.6, 141.0, 141.3, 141.4, 142.7, 143.1, 145.4, 145.7; IR (neat):  $\nu$  3055, 2985, 2933, 1597, 1487, 1444, 1381, 1305, 1254, 1162, 1089, 1002, 961, 861, 782, 704  $\text{cm}^{-1}$ ; HRMS (ESI-TOF) Calcd for  $\text{C}_{33}\text{H}_{37}\text{NO}_7\text{NaS}$   $[\text{M}+\text{Na}]^+$ : 614.2183, found: 614.2181.

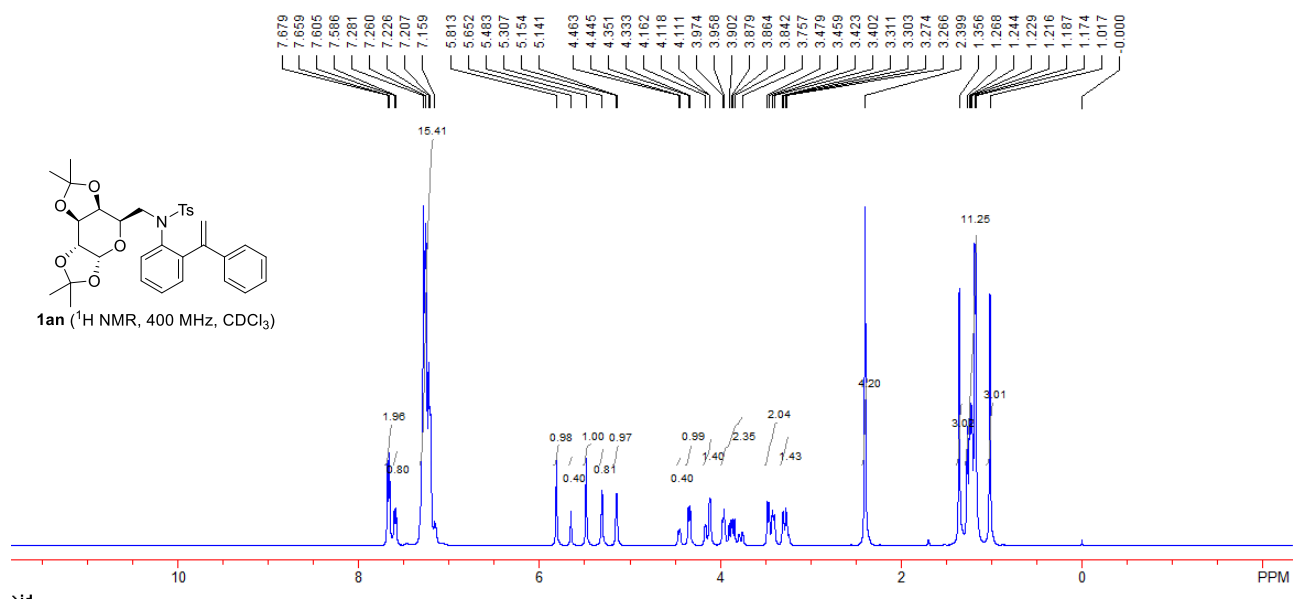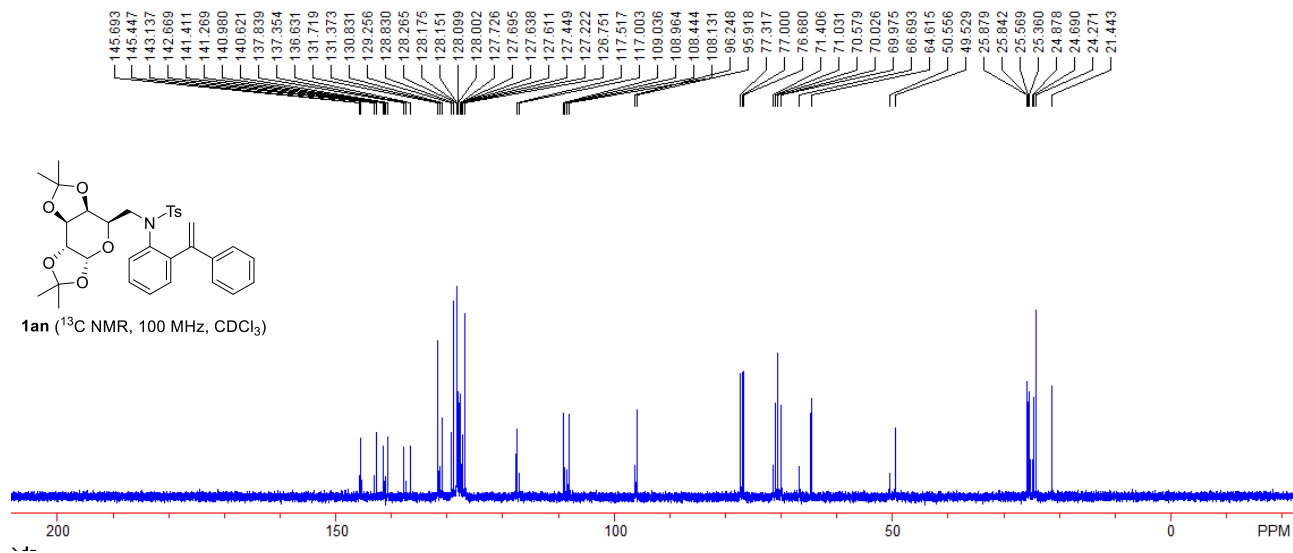

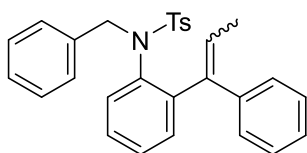

**Compound 1ao:** Yield: 2219 mg, 81%; a light yellow solid; Mp: 116-118 °C; Eluent: PE/EA = 10/1.  $^1\text{H}$  NMR (400 MHz,  $\text{CDCl}_3$ , TMS)  $\delta$  1.64 (d,  $J = 6.4$  Hz, 2.70H), 1.70 (d,  $J = 6.8$  Hz, 3.00H), 2.33 (s, 2.70H), 2.36 (s, 3.00H), 3.20-3.80 (m, 1.90H), 4.30-4.65 (m, 1.90H), 5.54 (q,  $J = 7.2$  Hz, 0.90H), 6.14 (q,  $J = 6.8$  Hz, 1.00H), 6.62-6.70 (m, 2.90H), 6.87 (d,  $J = 6.8$  Hz, 2.00H), 6.96-7.03 (m, 3.00H), 7.04-7.13 (m, 8.60H), 7.16-7.23 (m, 7.90H), 7.24-7.32 (m, 6.20H), 7.40-7.57 (m, 3.80H);  $^{13}\text{C}\{^1\text{H}\}$ -NMR (101 MHz,  $\text{CDCl}_3$ , TMS)  $\delta_{\text{C}}$  15.3, 15.9, 21.25, 21.30, 53.7, 53.9, 126.6, 126.7, 127.0, 127.3, 127.5, 127.67, 127.71, 127.81, 127.83, 128.1, 128.99, 129.05, 129.4, 129.52, 129.59, 131.7, 132.0, 132.6, 135.3, 135.7, 136.3, 137.6, 137.7, 139.2, 139.6, 140.0, 142.2, 142.8, 142.9, 145.1; IR (neat):  $\nu$  3059, 3025, 2977, 2910, 1597, 1493, 1444, 1306, 1181, 1155, 1028, 917, 816, 727  $\text{cm}^{-1}$ ; HRMS (ESI-TOF) Calcd for  $\text{C}_{29}\text{H}_{27}\text{NO}_2\text{NaS}$   $[\text{M}+\text{Na}]^+$ : 476.1655, found: 476.1655.

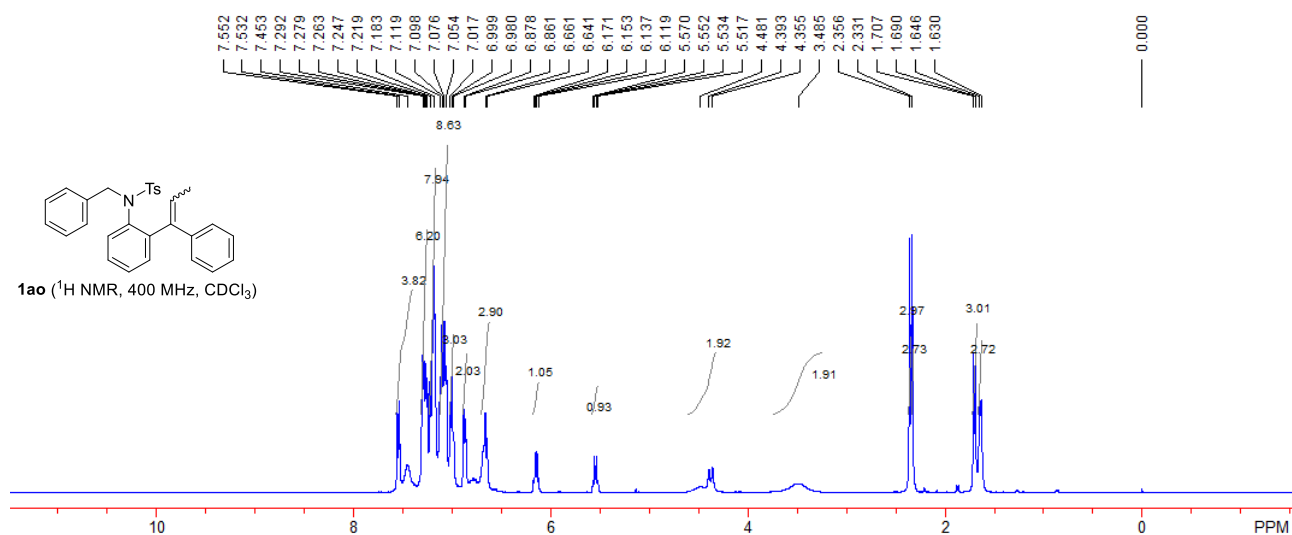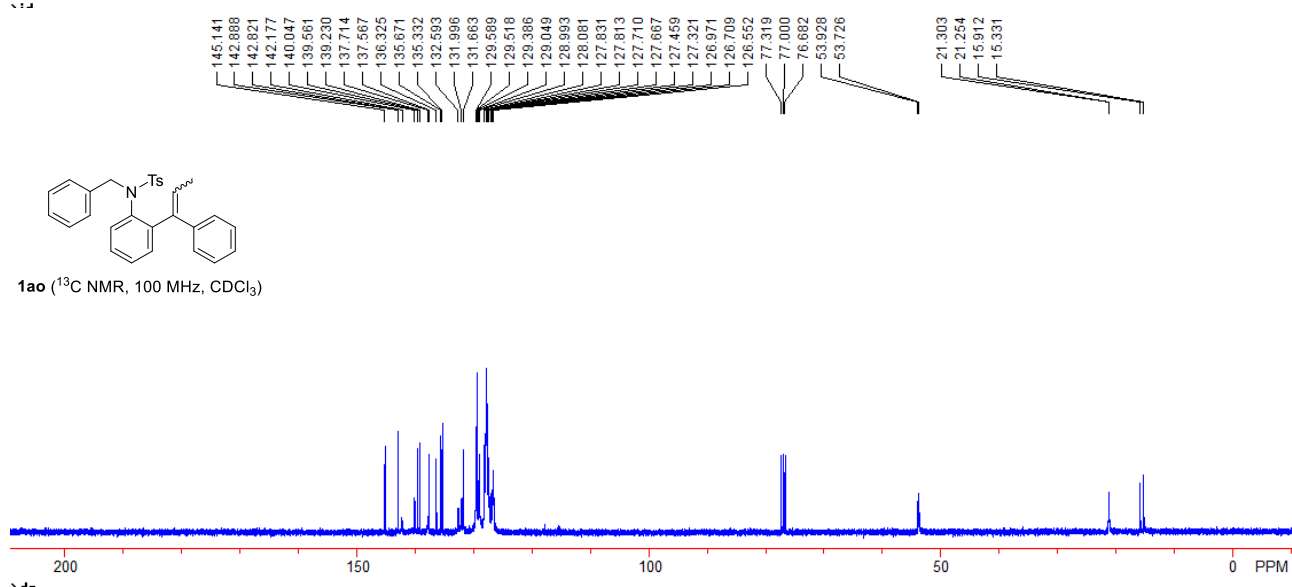

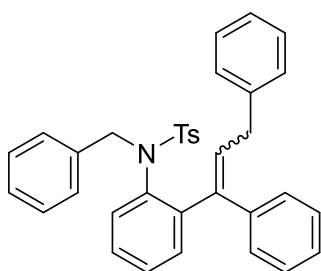

**Compound 1ap:** Yield: 1848 mg, 79%; a light yellow solid; Mp: 179-181 °C; Eluent: PE/EA = 10/1.  $^1\text{H}$  NMR (400 MHz,  $\text{CDCl}_3$ , TMS)  $\delta$  2.36 (s, 4.20H), 3.30-3.70 (m, 4.20H), 4.25-4.60 (m, 1.40H), 5.64 (t,  $J$  = 7.6 Hz, 0.40H), 6.31 (d,  $J$  = 7.2 Hz, 1.00H), 6.50-6.82 (m, 4.20H), 6.94-7.30 (m, 25.20H), 7.38-7.58 (m, 4.20H);  $^{13}\text{C}\{^1\text{H}\}$ -NMR (101 MHz,  $\text{CDCl}_3$ , TMS)  $\delta_{\text{C}}$  21.4, 35.6, 36.3, 53.9, 54.2, 125.76, 125.85, 126.92, 127.0, 127.1, 127.2, 127.4, 127.6, 127.8, 127.90, 127.97, 128.00, 128.04, 128.16, 128.24, 128.31, 128.33, 128.35, 128.42, 128.44, 129.1, 129.5, 129.7, 129.8, 131.38, 131.45, 132.0, 132.2, 132.3, 135.4, 135.6, 136.5, 137.4, 138.0, 139.6, 139.7, 140.0, 140.7, 141.0, 142.1, 143.0, 145.0; IR (neat):  $\nu$  3060, 3023, 1595, 1492, 1447, 1359, 1302, 1218, 1090, 1029, 994, 919, 878, 776, 703  $\text{cm}^{-1}$ ; HRMS (ESI-TOF) Calcd for  $\text{C}_{35}\text{H}_{31}\text{NO}_2\text{NaS}$   $[\text{M}+\text{Na}]^+$ : 552.1968, found: 552.1974.

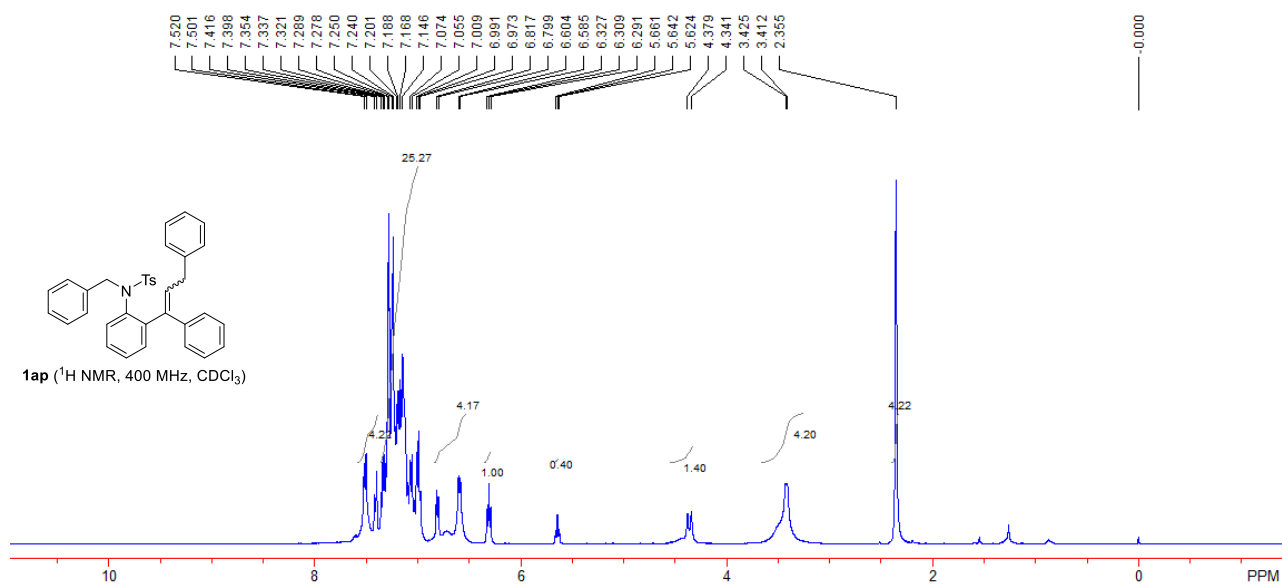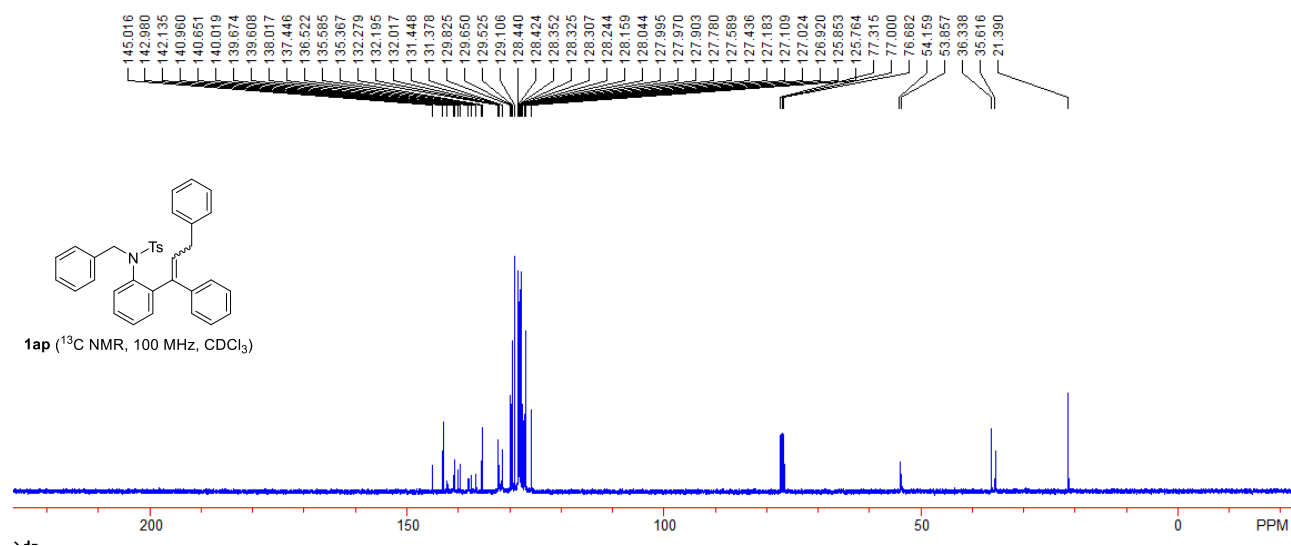

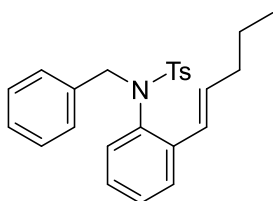

**Compound 1aq:** Yield: 2362 mg, 92%; a light yellow solid; Mp: 100-102 °C; Eluent: PE/EA = 5/1.  $^1\text{H}$  NMR (400 MHz,  $\text{CDCl}_3$ , TMS)  $\delta$  0.89 (t,  $J$  = 7.2 Hz, 3H), 1.28-1.40 (m, 2H), 1.99 (q,  $J$  = 6.8 Hz, 2H), 2.37 (s, 3H), 4.48 (d,  $J$  = 13.2 Hz, 1H), 4.79 (d,  $J$  = 13.2 Hz, 1H), 5.92-6.03 (m, 1H), 6.30 (d,  $J$  = 16.4 Hz, 1H), 6.67 (d,  $J$  = 8.0 Hz, 1H), 6.97 (t,  $J$  = 7.6 Hz, 1H), 7.03-7.16 (m, 6H), 7.22 (d,  $J$  = 8.0 Hz, 2H), 7.39 (d,  $J$  = 8.0 Hz, 1H), 7.59 (d,  $J$  = 7.6 Hz, 2H);  $^{13}\text{C}\{^1\text{H}\}$ -NMR (101 MHz,  $\text{CDCl}_3$ , TMS)  $\delta_{\text{C}}$  13.6, 21.3, 22.0, 35.0, 55.6, 125.3, 125.8, 126.7, 127.47, 127.53, 127.9, 128.2, 129.0, 129.3, 129.6, 132.3, 135.4, 135.6, 136.4, 138.3, 143.2; IR (neat):  $\nu$  3063, 3033, 2958, 2923, 2870, 1596, 1483, 1453, 1338, 1181, 1155, 1117, 1088, 1027, 964, 861, 765, 714  $\text{cm}^{-1}$ ; HRMS (ESI-TOF) Calcd for  $\text{C}_{25}\text{H}_{27}\text{NO}_2\text{NaS}$   $[\text{M}+\text{Na}]^+$ : 428.1655, found: 428.1652.

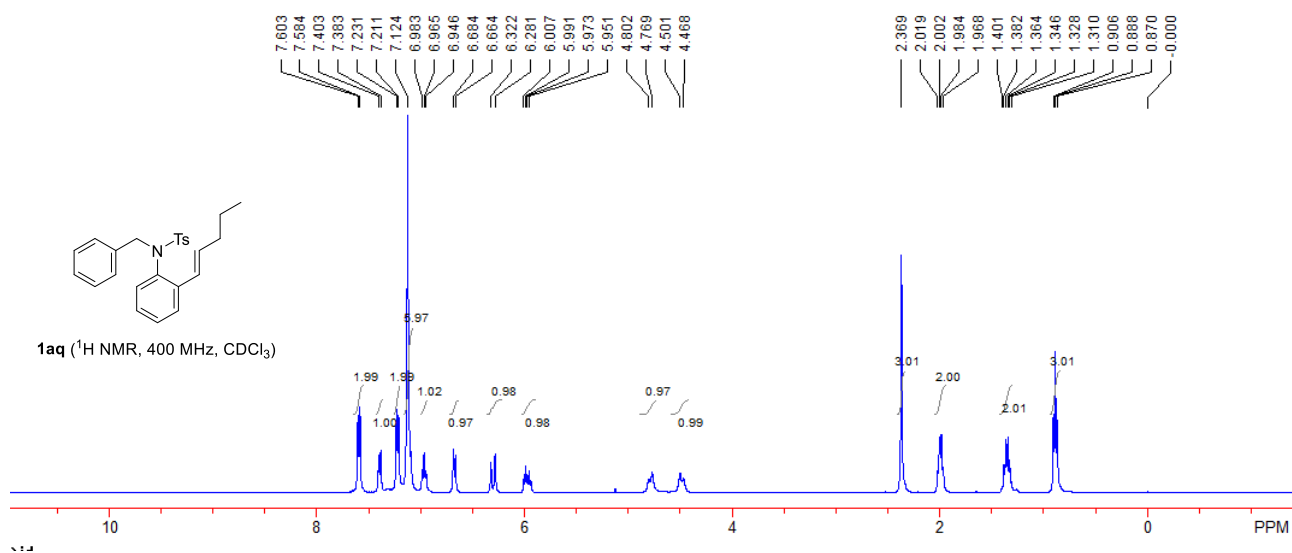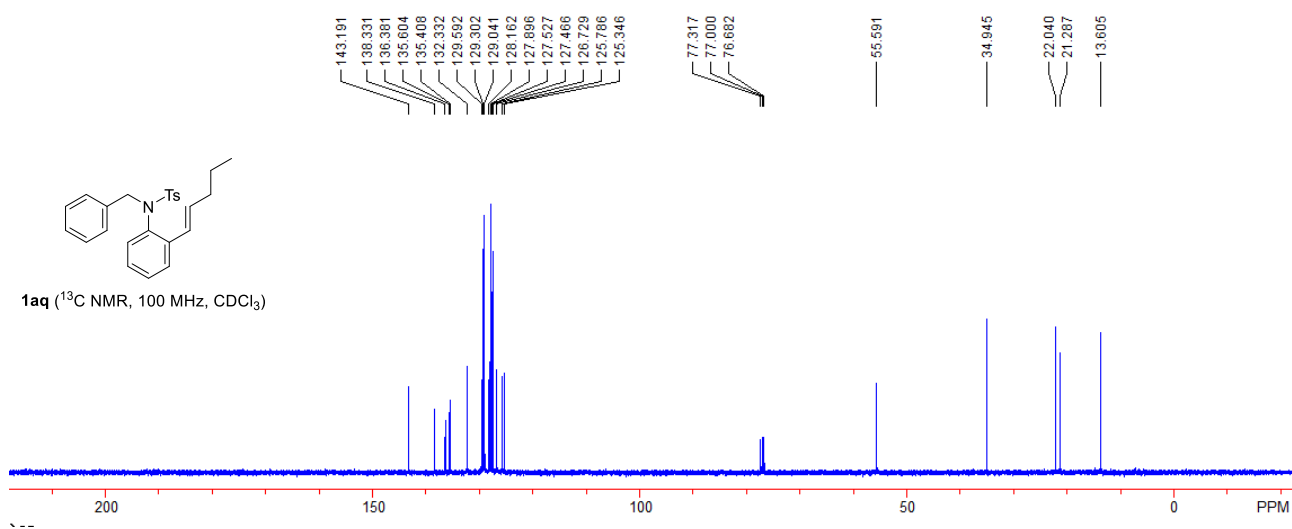

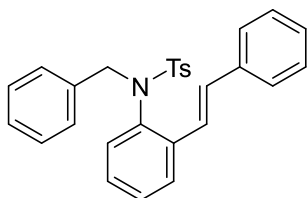

**Compound 1ar:** Yield: 2043 mg, 81%; a light yellow solid; Mp: 120-122 °C; Eluent: PE/EA = 5/1.  $^1\text{H}$  NMR (400 MHz,  $\text{CDCl}_3$ , TMS)  $\delta$  2.31 (s, 3H), 4.54 (d,  $J$  = 13.6 Hz, 1H), 4.84 (d,  $J$  = 14.0 Hz, 1H), 6.74-6.86 (m, 2H), 6.90 (d,  $J$  = 16.0 Hz, 1H), 7.04-7.32 (m, 14H), 7.55 (d,  $J$  = 8.0 Hz, 1H), 7.63 (d,  $J$  = 8.0 Hz, 2H);  $^{13}\text{C}\{^1\text{H}\}$ -NMR (101 MHz,  $\text{CDCl}_3$ , TMS)  $\delta_{\text{C}}$  21.4, 55.9, 124.1, 125.8, 126.6, 127.55, 127.57, 127.70, 127.71, 128.1, 128.3, 128.5, 129.1, 129.5, 129.9, 130.4, 135.4, 136.5, 136.6, 137.0, 137.7, 143.5; IR (neat):  $\nu$  3057, 3026, 2918, 1596, 1494, 1452, 1400, 1369, 1306, 1257, 1186, 1120, 1026, 980, 860, 776, 714 $\text{cm}^{-1}$ ; HRMS (ESI-TOF) Calcd for  $\text{C}_{28}\text{H}_{25}\text{NO}_2\text{NaS}$   $[\text{M}+\text{Na}]^+$ : 462.1498, found: 462.1494.

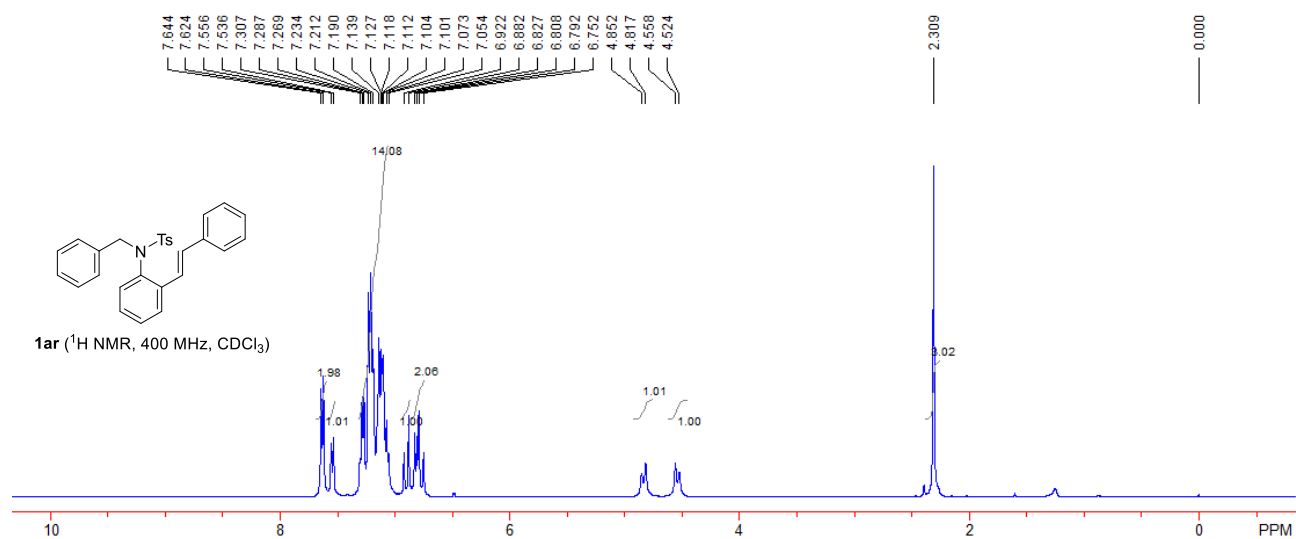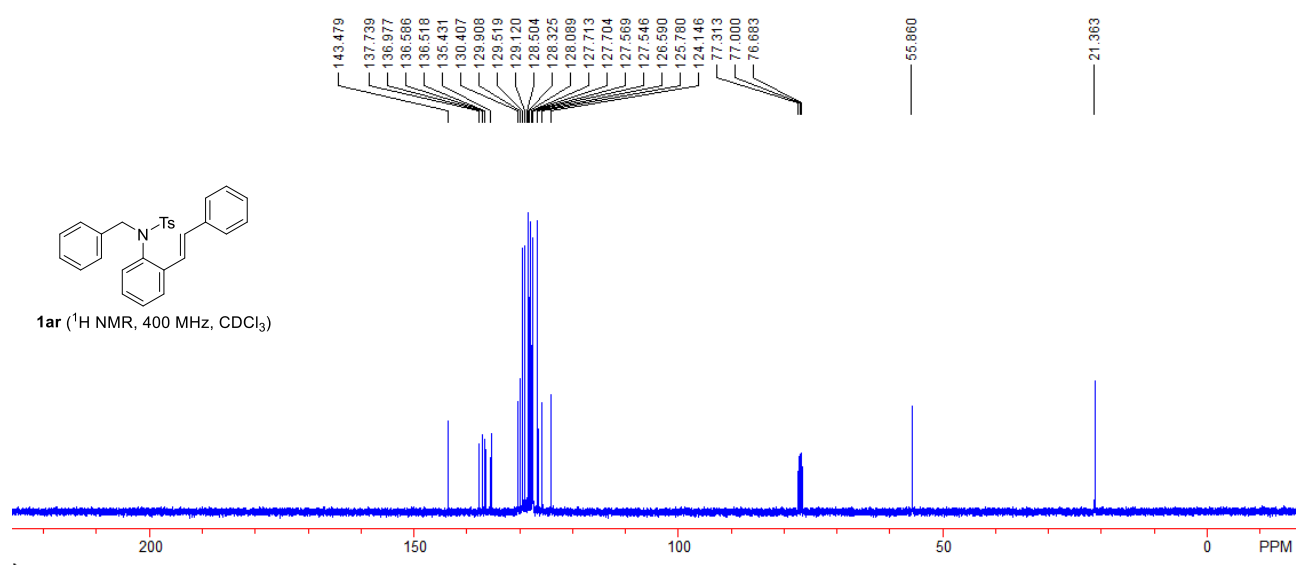

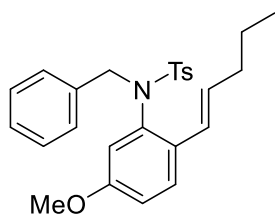

**Compound 1as:** Yield: 2482 mg, 90%; a yellow oil; Eluent: PE/EA = 5/1.  $^1\text{H}$  NMR (400 MHz,  $\text{CDCl}_3$ , TMS)  $\delta$  0.89 (t,  $J = 7.6$  Hz, 3H), 1.28-1.40 (m, 2H), 1.96 (q,  $J = 7.2$  Hz, 2H), 2.39 (s, 3H), 3.52 (s, 3H), 4.45-4.85 (m, 2H), 5.81-5.92 (m, 1H), 6.10-6.25 (m, 2H), 6.72 (dd,  $J_1 = 8.8$  Hz,  $J_2 = 2.4$  Hz, 1H), 7.10-7.20 (m, 5H), 7.25 (d,  $J = 8.0$  Hz, 2H), 7.32 (d,  $J = 8.8$  Hz, 1H), 7.63 (d,  $J = 8.0$  Hz, 2H);  $^{13}\text{C}\{^1\text{H}\}$ -NMR (101 MHz,  $\text{CDCl}_3$ , TMS)  $\delta_{\text{C}}$  13.7, 21.4, 22.3, 35.0, 55.0, 55.6, 114.6, 114.9, 124.8, 126.6, 127.6, 127.7, 128.0, 129.2, 129.4, 130.4, 131.0, 135.5, 136.4, 136.6, 143.3, 158.1; IR (neat):  $\nu$  3030, 2956, 2926, 2869, 2836, 1605, 1568, 1494, 1455, 1345, 1303, 1248, 1159, 1091, 1035, 966, 812, 754, 700  $\text{cm}^{-1}$ ; HRMS (ESI-TOF) Calcd for  $\text{C}_{26}\text{H}_{29}\text{NO}_3\text{NaS}$   $[\text{M}+\text{Na}]^+$ : 458.1760, found: 458.1758.

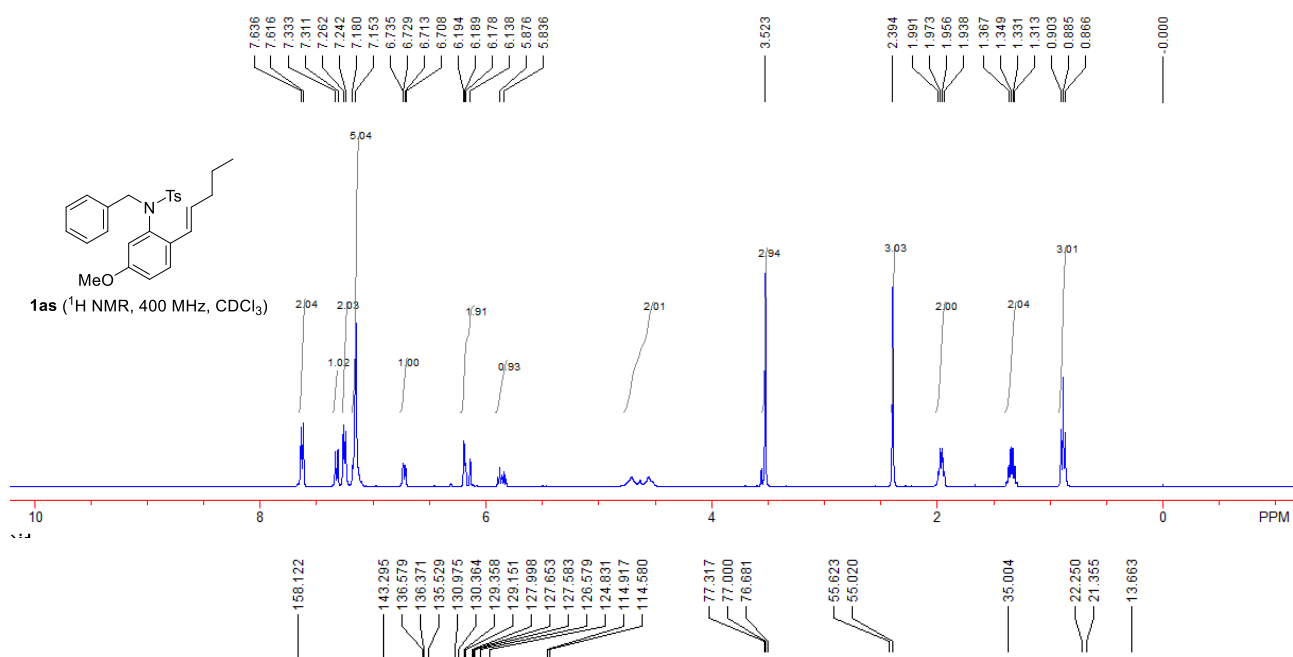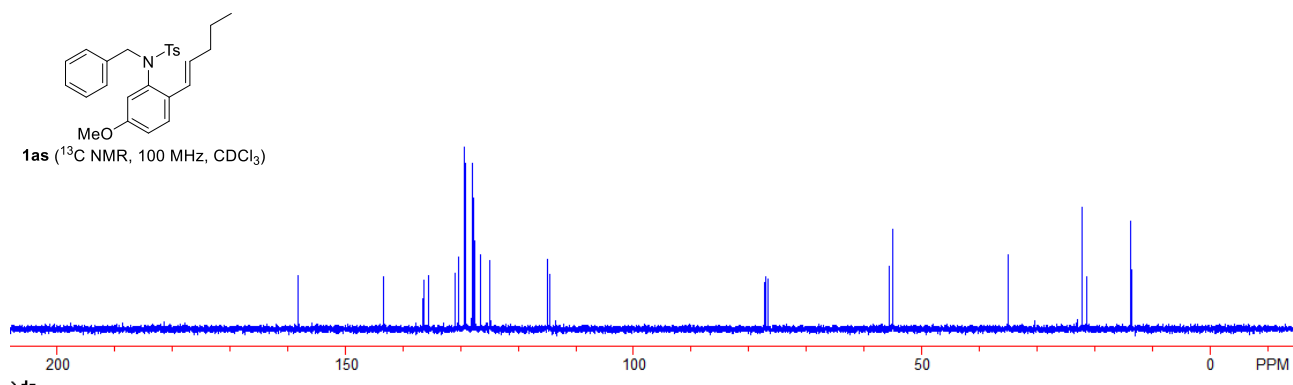

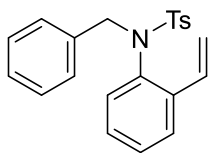

**Compound 1at:** Yield: 1826 mg, 77%; a light red solid; Mp: 73-75 °C; Eluent: PE/EA = 10/1.  $^1\text{H}$  NMR (400 MHz,  $\text{CDCl}_3$ , TMS)  $\delta$  2.34 (s, 3H), 4.37 (d,  $J = 12.4$  Hz, 1H), 4.88 (d,  $J = 12.8$  Hz, 1H), 5.06 (d,  $J = 10.8$  Hz, 1H), 5.49 (d,  $J = 17.6$  Hz, 1H), 6.65 (d,  $J = 8.0$  Hz, 1H), 6.76-6.86 (m, 1H), 7.02 (t,  $J = 7.6$  Hz, 1H), 7.08-7.16 (m, 6H), 7.21 (d,  $J = 8.0$  Hz, 2H), 7.44 (d,  $J = 7.6$  Hz, 1H), 7.57 (d,  $J = 8.0$  Hz, 2H);  $^{13}\text{C}\{^1\text{H}\}$ -NMR (101 MHz,  $\text{CDCl}_3$ , TMS)  $\delta_{\text{C}}$  21.2, 55.6, 115.0, 125.6, 127.45, 127.49, 127.7, 127.9, 128.1, 128.7, 128.9, 129.3, 132.3, 135.0, 135.7, 136.2, 138.2, 143.3; IR (neat):  $\nu$  3029, 1628, 1597, 1484, 1411, 1373, 1289, 1186, 1107, 1052, 995, 915, 813, 770, 709  $\text{cm}^{-1}$ ; HRMS (ESI-TOF) Calcd for  $\text{C}_{22}\text{H}_{21}\text{NO}_2\text{NaS}$   $[\text{M}+\text{Na}]^+$ : 386.1185, found: 386.1188.

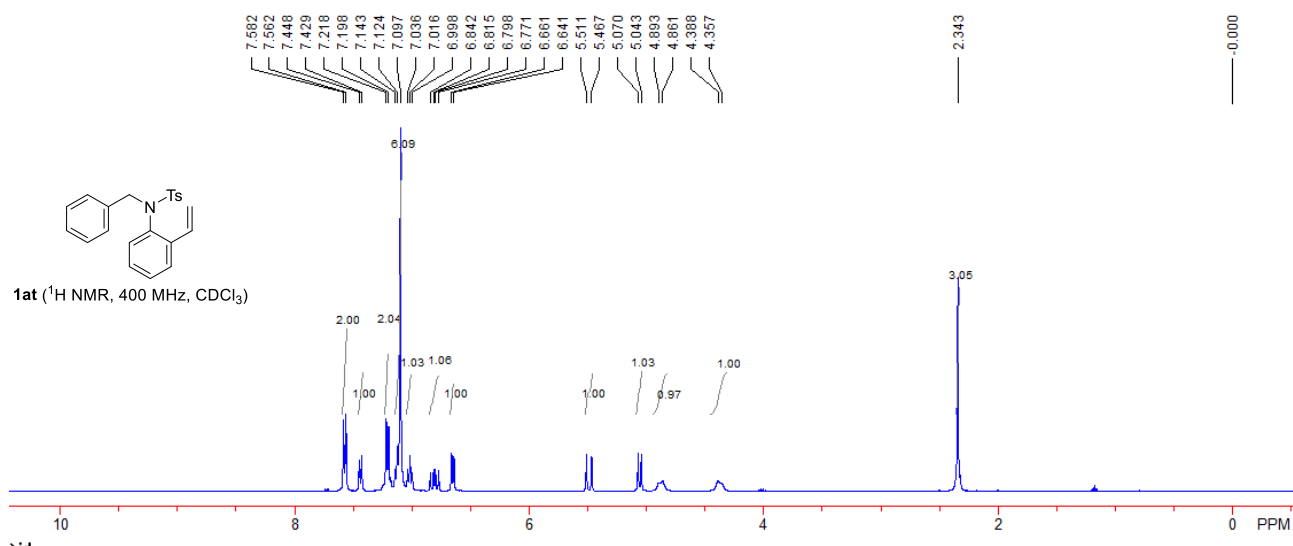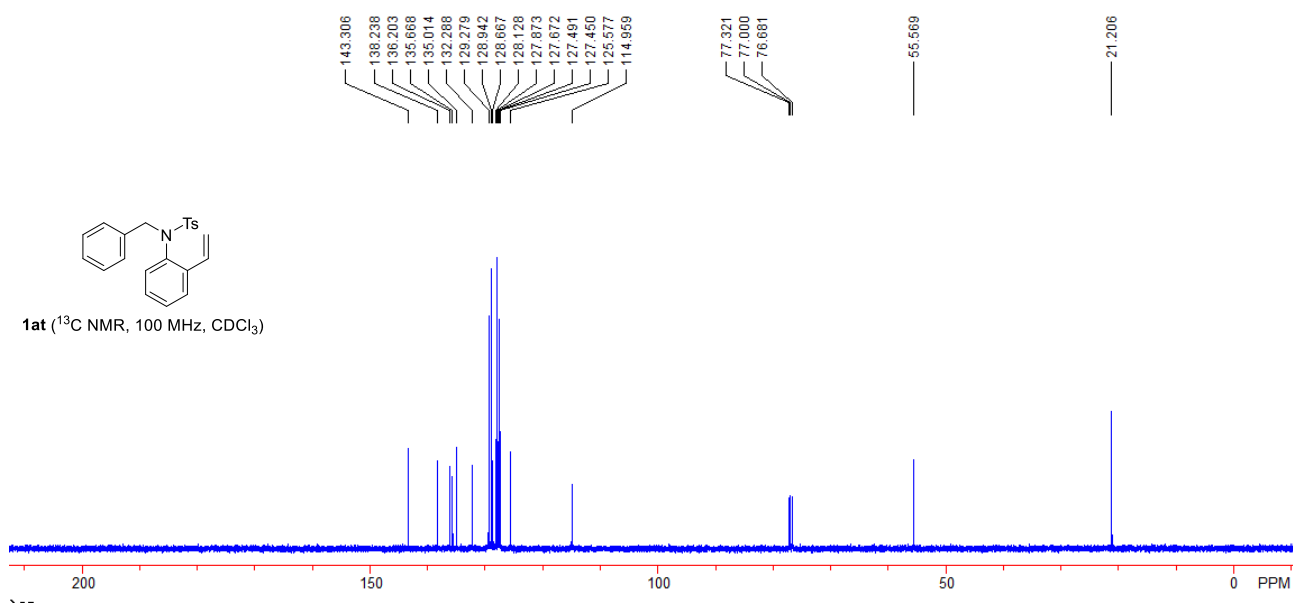

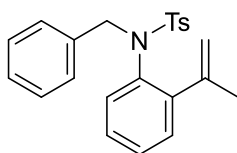

**Compound 1au:** Yield: 1992 mg, 90%; a light yellow solid; Mp: 80-82 °C; Eluent: PE/EA = 10/1.  $^1\text{H}$  NMR (400 MHz,  $\text{CDCl}_3$ , TMS)  $\delta$  1.87 (s, 3H), 2.35 (s, 3H), 4.30-4.90 (m, 3H), 5.02 (s, 1H), 6.77 (d,  $J = 7.6$  Hz, 1H), 6.98 (d,  $J = 7.6$  Hz, 2H), 7.02-7.14 (m, 6H), 7.22 (d,  $J = 7.6$  Hz, 2H), 7.63 (d,  $J = 7.6$  Hz, 2H);  $^{13}\text{C}\{^1\text{H}\}$ -NMR (101 MHz,  $\text{CDCl}_3$ , TMS)  $\delta_{\text{C}}$  21.2, 23.9, 55.4, 116.2, 127.0, 127.5, 127.78, 127.82, 128.4, 129.2, 129.4, 129.6, 134.9, 136.1, 136.5, 142.5, 143.2, 144.6; IR (neat):  $\nu$  2978, 1642, 1597, 1489, 1438, 1366, 1343, 1200, 1182, 1157, 1089, 952, 858, 782, 703  $\text{cm}^{-1}$ ; HRMS (ESI-TOF) Calcd for  $\text{C}_{23}\text{H}_{23}\text{NO}_2\text{NaS}$   $[\text{M}+\text{Na}]^+$ : 400.1342, found: 400.1340.

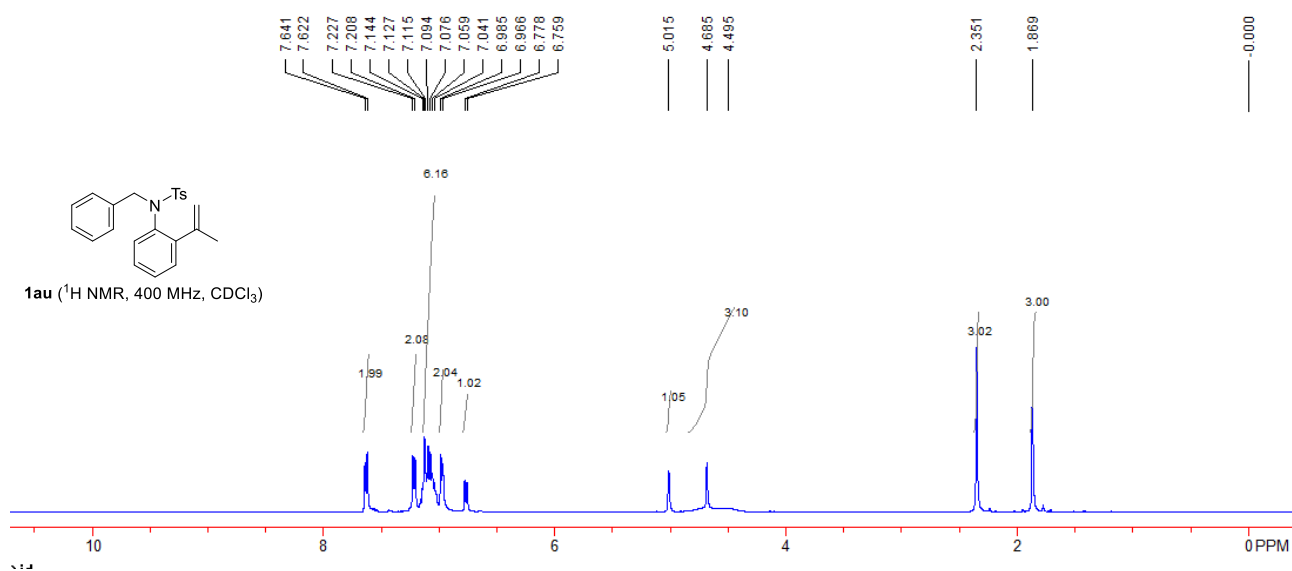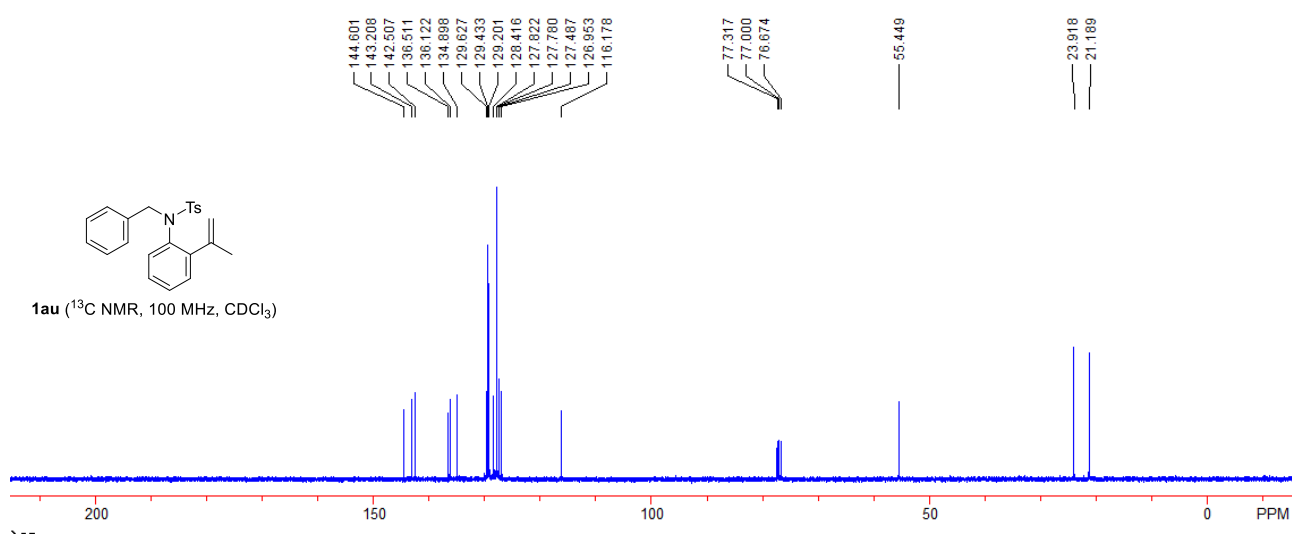

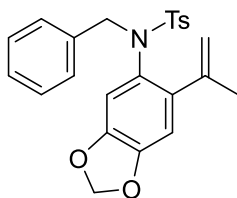

**Compound 1av:** Yield: 1076 mg, 80%; a light yellow solid; Mp: 158-160 °C; Eluent: PE/EA = 5/1. <sup>1</sup>H NMR (400 MHz, CDCl<sub>3</sub>, TMS) δ 1.80 (s, 3H), 2.42 (s, 3H), 4.38 (d, *J* = 12.8 Hz, 1H), 4.65 (s, 1H), 4.71 (d, *J* = 13.2 Hz, 1H), 4.98 (s, 1H), 5.88 (s, 2H), 6.25 (s, 1H), 6.58 (s, 1H), 6.99 (d, *J* = 6.4 Hz, 2H), 7.10-7.20 (m, 3H), 7.28 (d, *J* = 7.6 Hz, 2H), 7.69 (d, *J* = 8.0 Hz, 2H); <sup>13</sup>C{<sup>1</sup>H}-NMR (101 MHz, CDCl<sub>3</sub>, TMS) δ<sub>C</sub> 21.4, 24.1, 55.7, 101.6, 108.6, 109.0, 116.4, 127.7, 128.1, 129.2, 129.5, 129.7, 135.0, 136.8, 139.2, 142.4, 143.5, 146.2, 146.9; IR (neat): ν 3029, 2970, 2921, 1595, 1507, 1489, 1452, 1377, 1329, 1279, 1242, 1205, 1152, 1082, 1028, 966, 873, 819, 719, 697 cm<sup>-1</sup>; HRMS (ESI-TOF) Calcd for C<sub>24</sub>H<sub>23</sub>NO<sub>4</sub>NaS [M+Na]<sup>+</sup>: 444.1240, found: 444.1248.

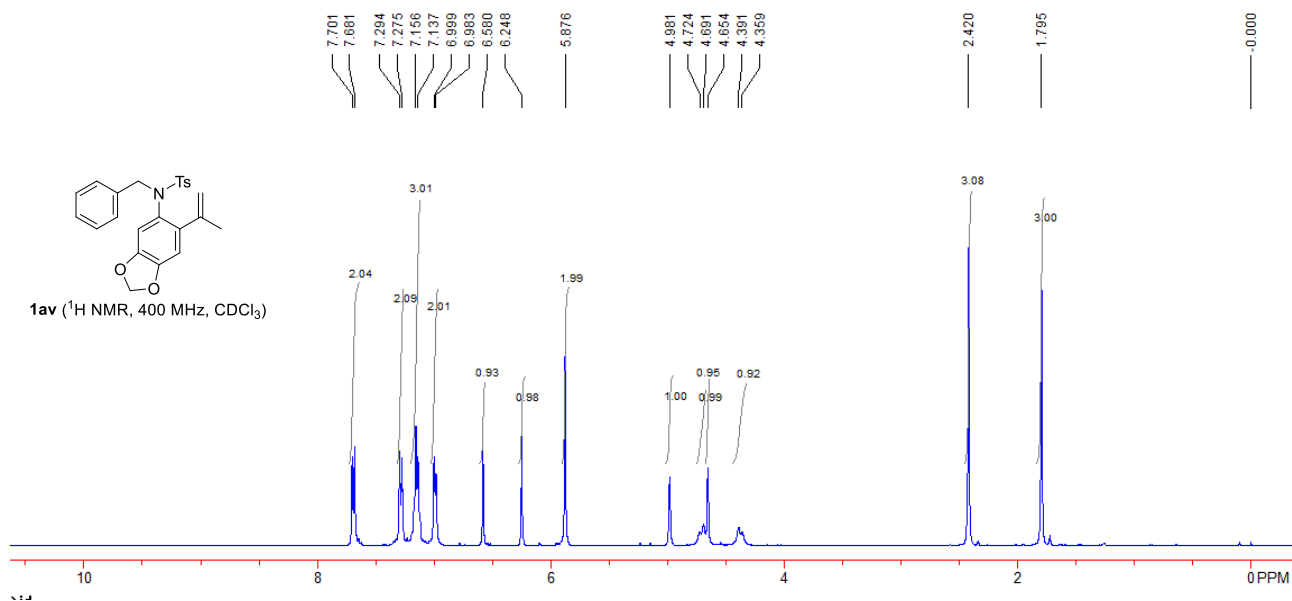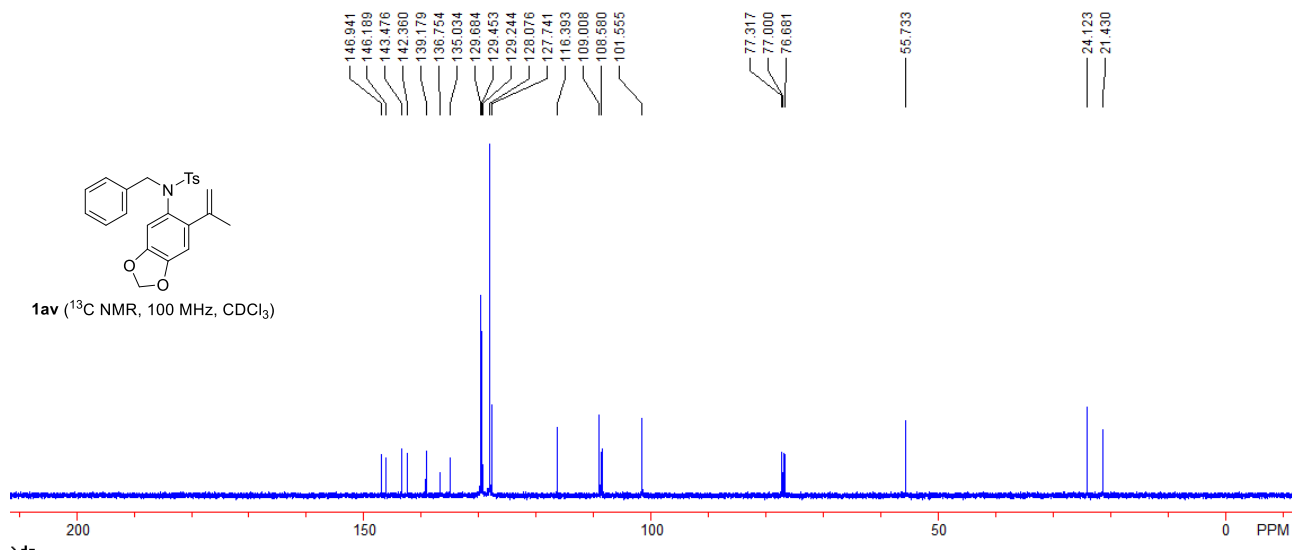

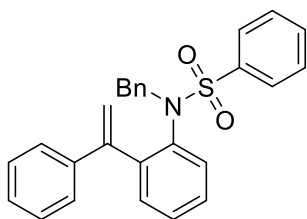

**Compound 1aw:** Yield: 1957 mg, 87%; a light yellow solid; Mp: 98-100 °C; Eluent: PE/EA = 10/1.  $^1\text{H}$  NMR (400 MHz,  $\text{CDCl}_3$ , TMS)  $\delta$  4.00-4.60 (m, 2H), 5.08 (s, 1H), 5.61 (s, 1H), 6.84 (d,  $J$  = 6.8 Hz, 2H), 6.93 (d,  $J$  = 8.0 Hz, 1H), 7.00-7.13 (m, 4H), 7.15-7.26 (m, 7H), 7.32 (d,  $J$  = 8.0 Hz, 2H), 7.44 (d,  $J$  = 7.2 Hz, 1H), 7.62 (d,  $J$  = 7.2 Hz, 2H);  $^{13}\text{C}\{^1\text{H}\}$ -NMR (101 MHz,  $\text{CDCl}_3$ , TMS)  $\delta_{\text{C}}$  54.5, 117.1, 126.8, 127.5, 127.7, 127.80, 127.90, 127.93, 128.1, 128.5, 129.2, 130.9, 131.9, 132.4, 135.2, 137.0, 140.2, 140.7, 142.2, 145.8; IR (neat):  $\nu$  3060, 2987, 2926, 1614, 1487, 1446, 1355, 1321, 1273, 1211, 1176, 1103, 1088, 1047, 994, 880, 807, 784, 712  $\text{cm}^{-1}$ ; HRMS (ESI-TOF) Calcd for  $\text{C}_{27}\text{H}_{23}\text{NO}_2\text{NaS}$   $[\text{M}+\text{Na}]^+$ : 448.1342, found: 448.1350.

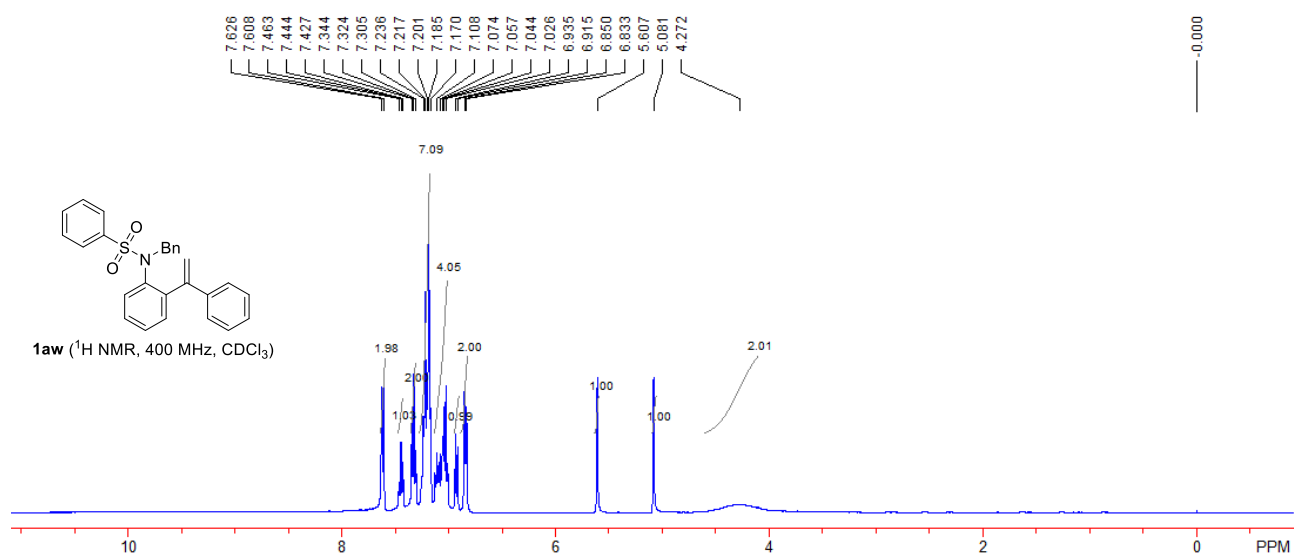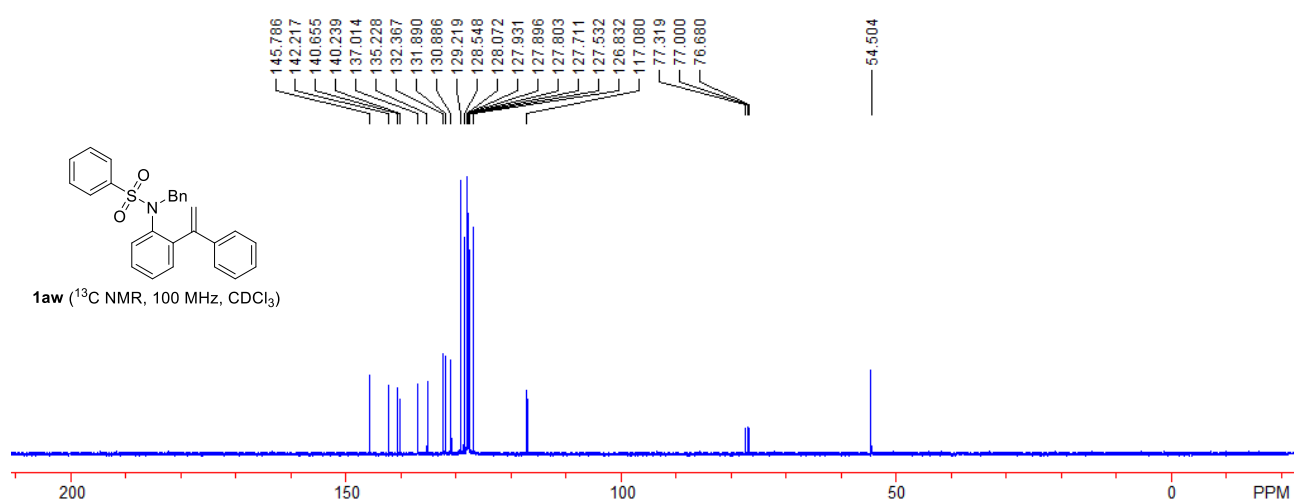

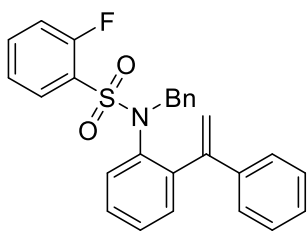

**Compound 1ax:** Yield: 1879 mg, 90%; a yellow oil; Eluent: PE/EA = 10/1.  $^1\text{H}$  NMR (400 MHz,  $\text{CDCl}_3$ , TMS)  $\delta$  4.00-5.00 (m, 2H), 4.73 (s, 1H), 5.43 (s, 1H), 6.87 (d,  $J = 7.6$  Hz, 1H), 6.92-7.00 (m, 2H), 7.03-7.32 (m, 13H), 7.52 (q,  $J = 6.4$  Hz, 1H), 7.67 (t,  $J = 7.6$  Hz, 1H);  $^{13}\text{C}\{^1\text{H}\}$ -NMR (101 MHz,  $\text{CDCl}_3$ , TMS)  $\delta_{\text{C}}$  54.3 (d,  $J = 3.6$  Hz), 116.8, 117.0 (d,  $J = 21.7$  Hz), 124.0 (d,  $J = 3.8$  Hz), 127.68, 127.72 (d,  $J = 20.6$  Hz), 128.1, 128.20, 128.24, 129.3, 131.1, 131.8, 133.4, 134.7 (d,  $J = 8.4$  Hz), 135.85, 135.90, 140.4, 142.1, 145.8, 159.1 (d,  $J = 254.8$  Hz);  $^{19}\text{F}$  NMR (376 MHz,  $\text{CDCl}_3$ )  $\delta$  -106.0; IR (neat):  $\nu$  3059, 3028, 2917, 1617, 1597, 1474, 1447, 1345, 1264, 1211, 1153, 1123, 1073, 1027, 952, 827, 733  $\text{cm}^{-1}$ ; HRMS (ESI-TOF) Calcd for  $\text{C}_{27}\text{H}_{22}\text{NO}_2\text{FNaS}$   $[\text{M}+\text{Na}]^+$ : 466.1248, found: 466.1256.

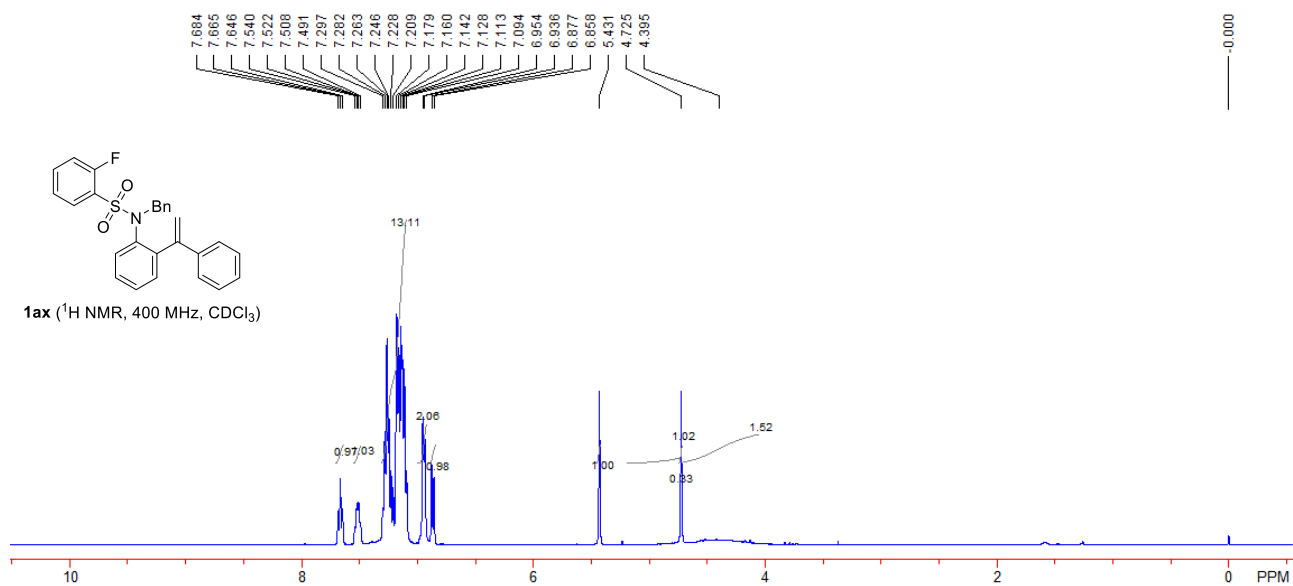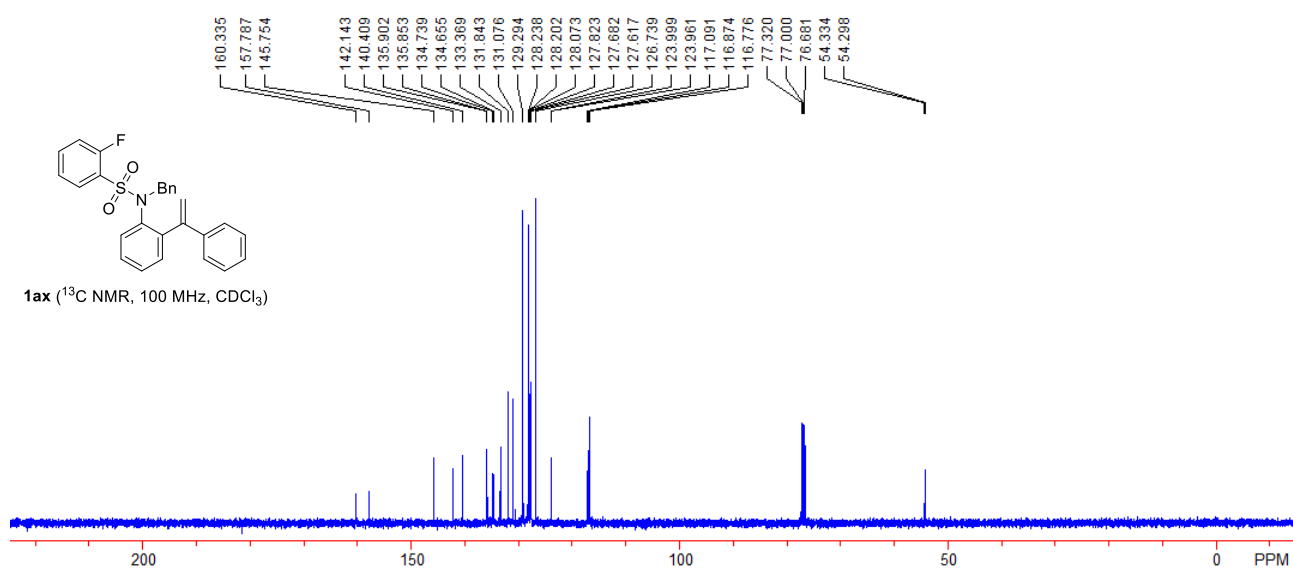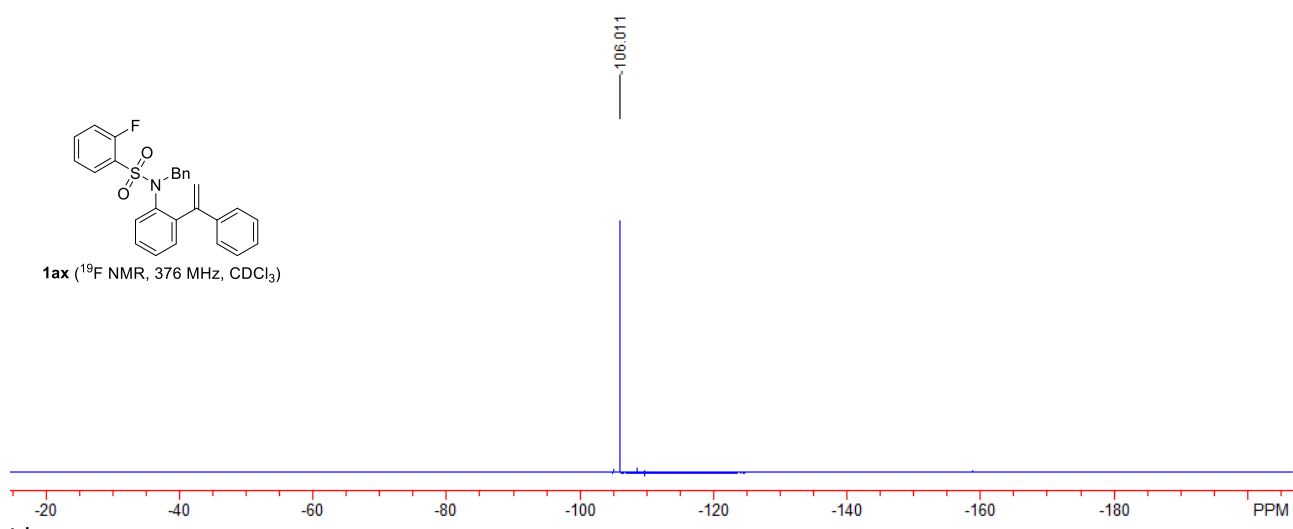

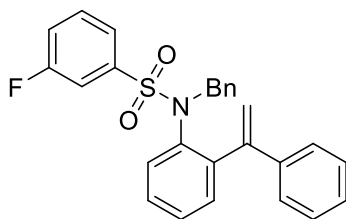

**Compound 1ay:** Yield: 1702 mg, 80%; a yellow oil; Eluent: PE/EA = 10/1.  $^1\text{H}$  NMR (400 MHz,  $\text{CDCl}_3$ , TMS)  $\delta$  3.80-4.60 (m, 2H), 5.10 (s, 1H), 5.64 (s, 1H), 6.85 (d,  $J = 7.2$  Hz, 2H), 6.92 (d,  $J = 8.0$  Hz, 1H), 7.02-7.30 (m, 14H), 7.38 (d,  $J = 7.6$  Hz, 1H);  $^{13}\text{C}\{^1\text{H}\}$ -NMR (101 MHz,  $\text{CDCl}_3$ , TMS)  $\delta_{\text{C}}$  54.8, 115.1 (d,  $J = 24.3$  Hz), 117.1, 119.4 (d,  $J = 21.0$  Hz), 123.6 (d,  $J = 3.3$  Hz), 126.8, 127.70, 127.72, 127.9, 128.0, 128.17, 128.21, 129.3, 130.2 (d,  $J = 7.6$  Hz), 130.9, 132.0, 135.0, 136.9, 140.5, 142.2, 142.4 (d,  $J = 6.2$  Hz), 146.0, 161.9 (d,  $J = 249.3$  Hz);  $^{19}\text{F}$  NMR (376 MHz,  $\text{CDCl}_3$ )  $\delta$  -109.9; IR (neat):  $\nu$  3063, 3029, 2918, 1589, 1494, 1433, 1348, 1269, 1222, 1150, 1083, 910, 862, 766, 697  $\text{cm}^{-1}$ ; HRMS (ESI-TOF) Calcd for  $\text{C}_{27}\text{H}_{22}\text{NO}_2\text{FNaS}$   $[\text{M}+\text{Na}]^+$ : 466.1248, found: 466.1257.

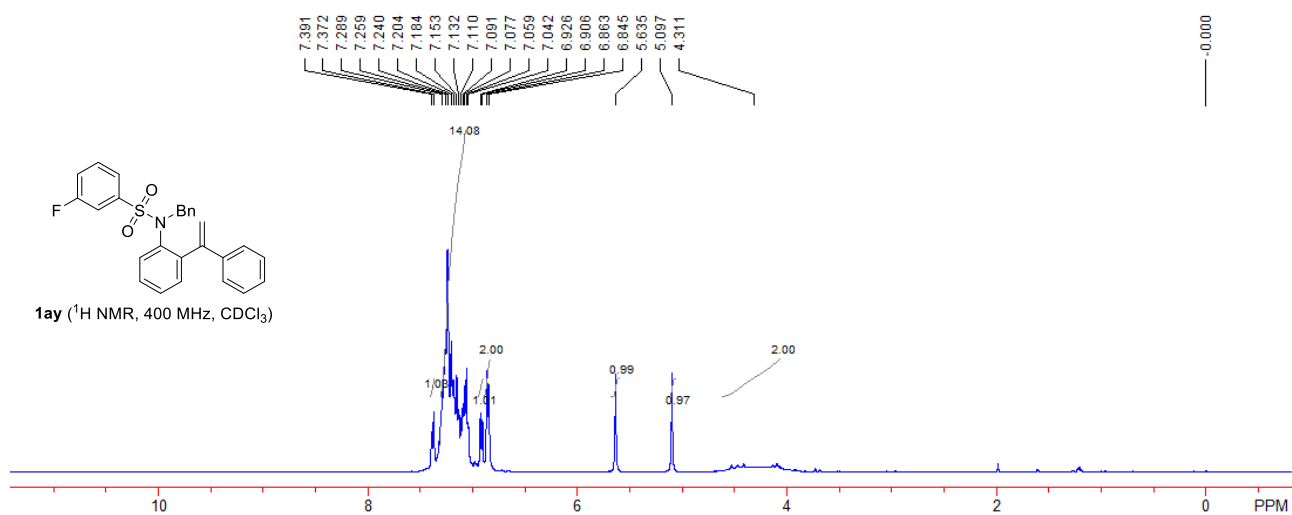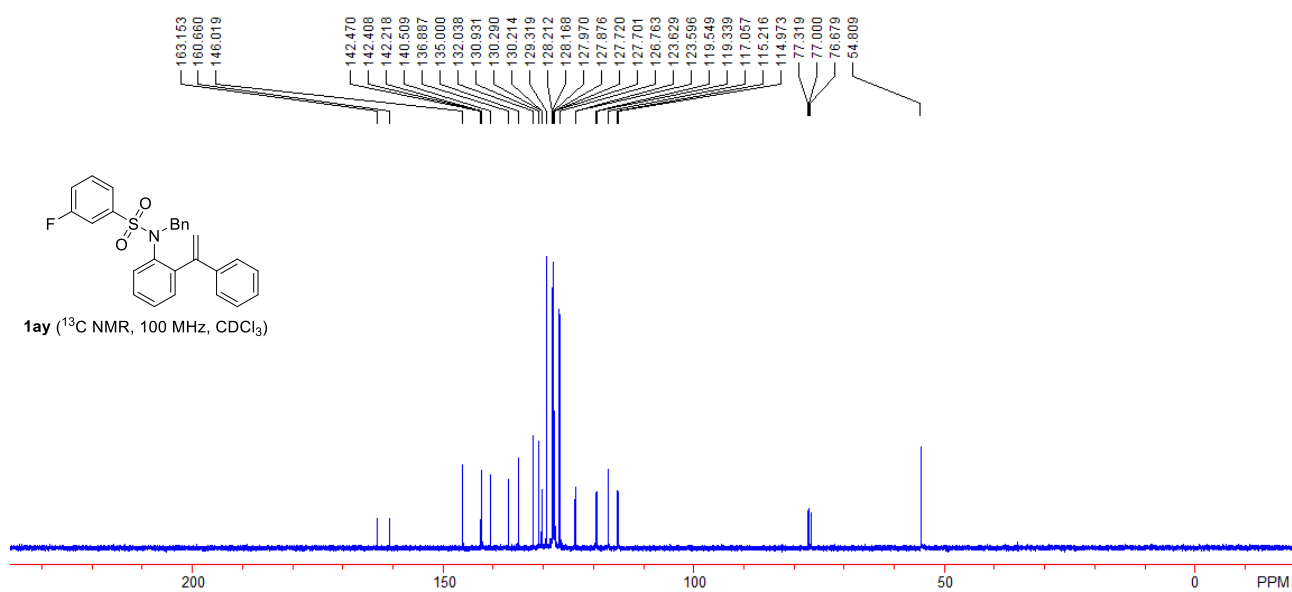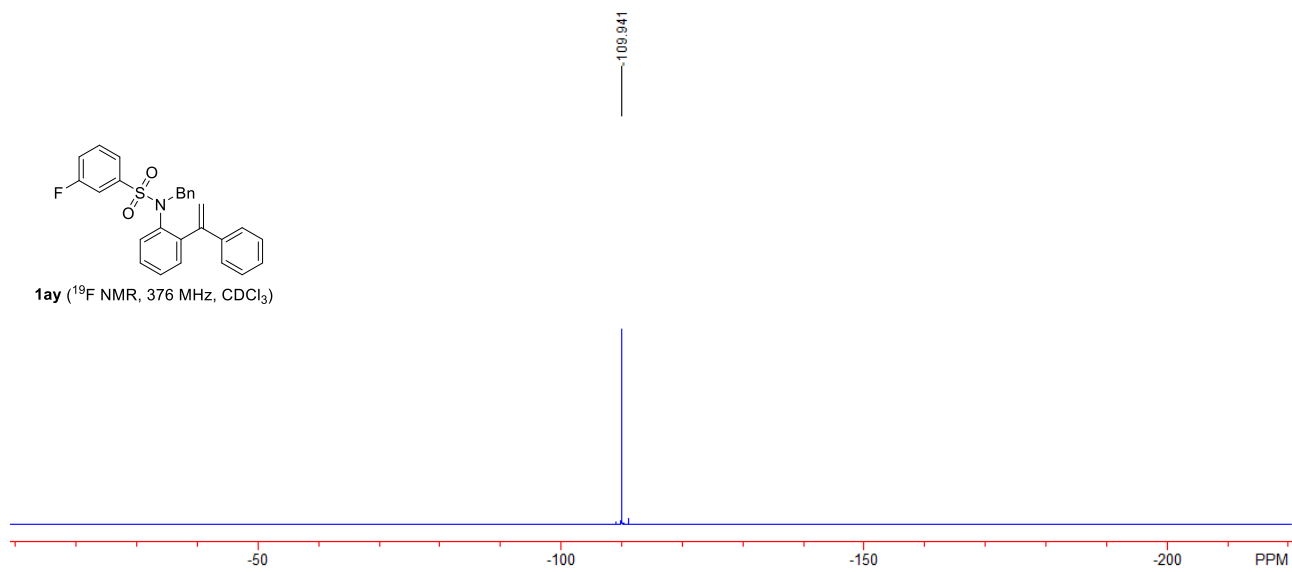

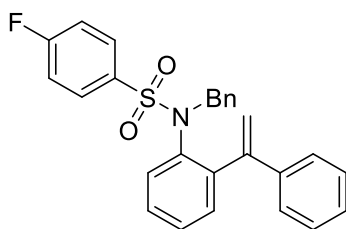

**Compound 1az:** Yield: 1935 mg, 92%; a yellow oil; Eluent: PE/EA = 10/1.  $^1\text{H}$  NMR (400 MHz,  $\text{CDCl}_3$ , TMS)  $\delta$  3.90-4.60 (m, 2H), 5.09 (s, 1H), 5.64 (s, 1H), 6.86 (d,  $J = 7.2$  Hz, 2H), 6.94 (d,  $J = 7.6$  Hz, 1H), 7.00 (t,  $J = 8.4$  Hz, 2H), 7.03-7.30 (m, 11H), 7.50-7.57 (m, 2H);  $^{13}\text{C}\{^1\text{H}\}$ -NMR (101 MHz,  $\text{CDCl}_3$ , TMS)  $\delta_{\text{C}}$  54.8, 115.6 (d,  $J = 22.4$  Hz), 117.0, 126.8, 127.65, 127.66, 127.9, 128.0, 128.13, 128.18, 129.3, 130.6 (d,  $J = 9.3$  Hz), 130.8, 132.1, 136.4, (d,  $J = 2.9$  Hz), 137.1, 140.6, 142.1, 146.6, 164.7 (d,  $J = 253.6$  Hz);  $^{19}\text{F}$  NMR (376 MHz,  $\text{CDCl}_3$ )  $\delta$  -105.4; IR (neat):  $\nu$  3062, 3029, 2930, 1590, 1491, 1404, 1344, 1290, 1233, 1151, 1089, 1027, 910, 835, 766, 696  $\text{cm}^{-1}$ ; HRMS (ESI-TOF) Calcd for  $\text{C}_{27}\text{H}_{22}\text{NO}_2\text{FNaS}$   $[\text{M}+\text{Na}]^+$ : 466.1248, found: 466.1238.

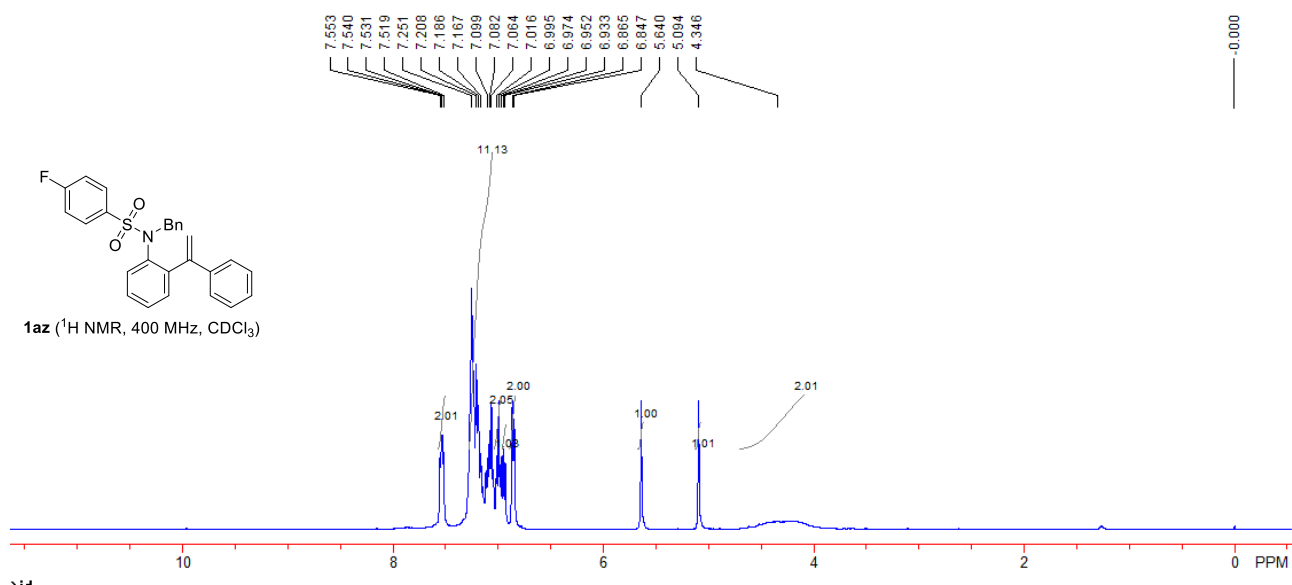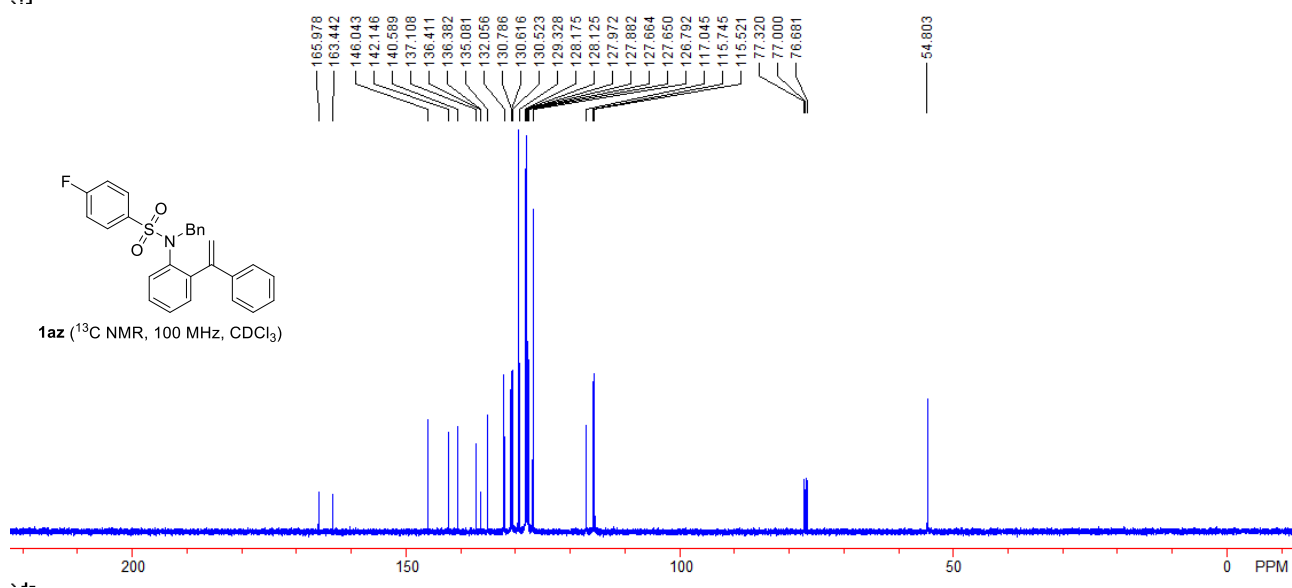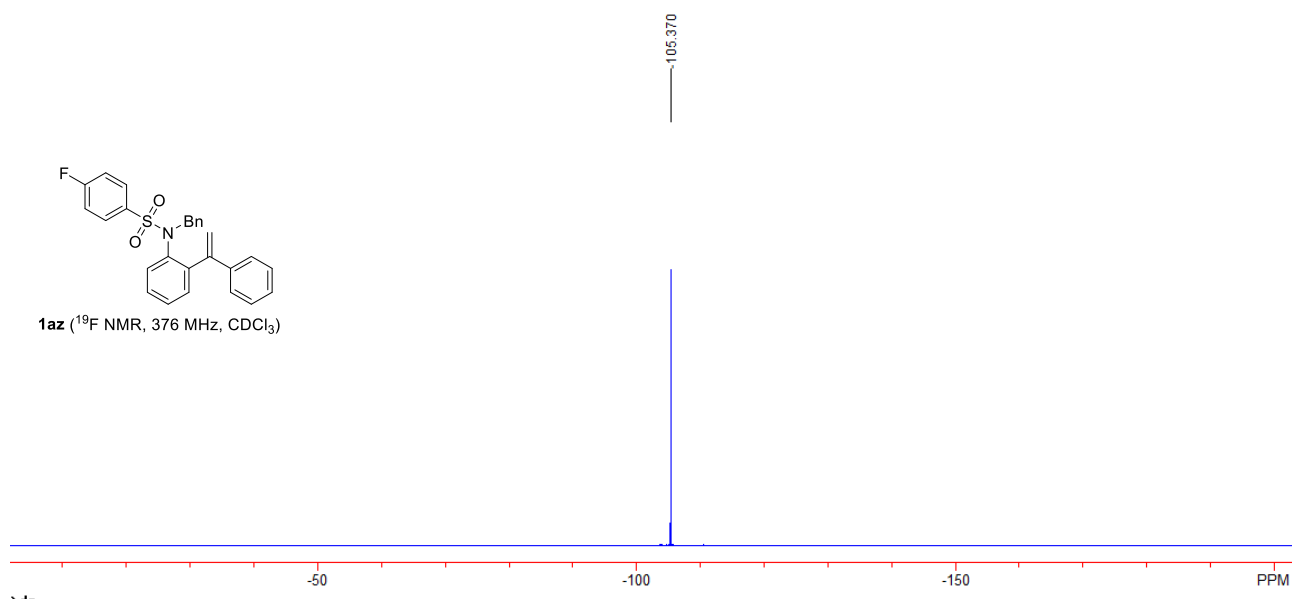

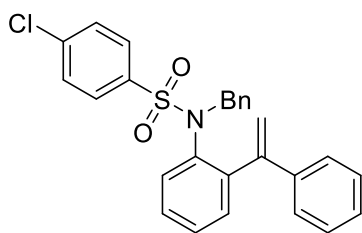

**Compound 1aaa:** Yield: 1855 mg, 86%; a yellow oil; Eluent: PE/EA = 10/1.  $^1\text{H}$  NMR (400 MHz,  $\text{CDCl}_3$ , TMS)  $\delta$  3.90-4.60 (m, 2H), 5.10 (s, 1H), 5.64 (s, 1H), 6.87 (d,  $J = 8.8$  Hz, 2H), 6.93 (d,  $J = 8.0$  Hz, 1H), 7.03-7.30 (m, 13H), 7.45 (d,  $J = 8.4$  Hz, 2H);  $^{13}\text{C}\{^1\text{H}\}$ -NMR (101 MHz,  $\text{CDCl}_3$ , TMS)  $\delta_{\text{C}}$  54.9, 117.1, 126.8, 127.6, 127.7, 127.9, 128.0, 128.1, 128.2, 128.7, 129.30, 129.33, 130.8, 132.1, 135.0, 137.0, 138.6, 138.9, 140.5, 142.1, 146.0; IR (neat):  $\nu$  3060, 3027, 2987, 1583, 1493, 1445, 1346, 1276, 1211, 1158, 1085, 1012, 909, 824, 757, 697  $\text{cm}^{-1}$ ; HRMS (ESI-TOF) Calcd for  $\text{C}_{27}\text{H}_{22}\text{NO}_2\text{NaSCl}$   $[\text{M}+\text{Na}]^+$ : 482.0952, found: 482.0961.

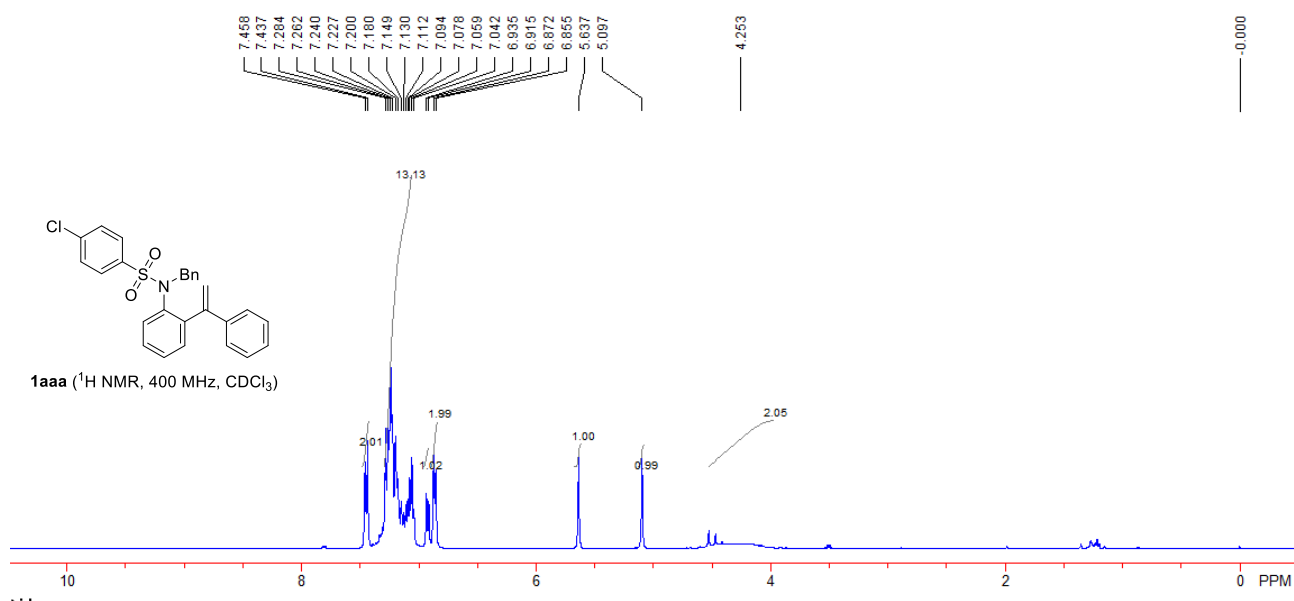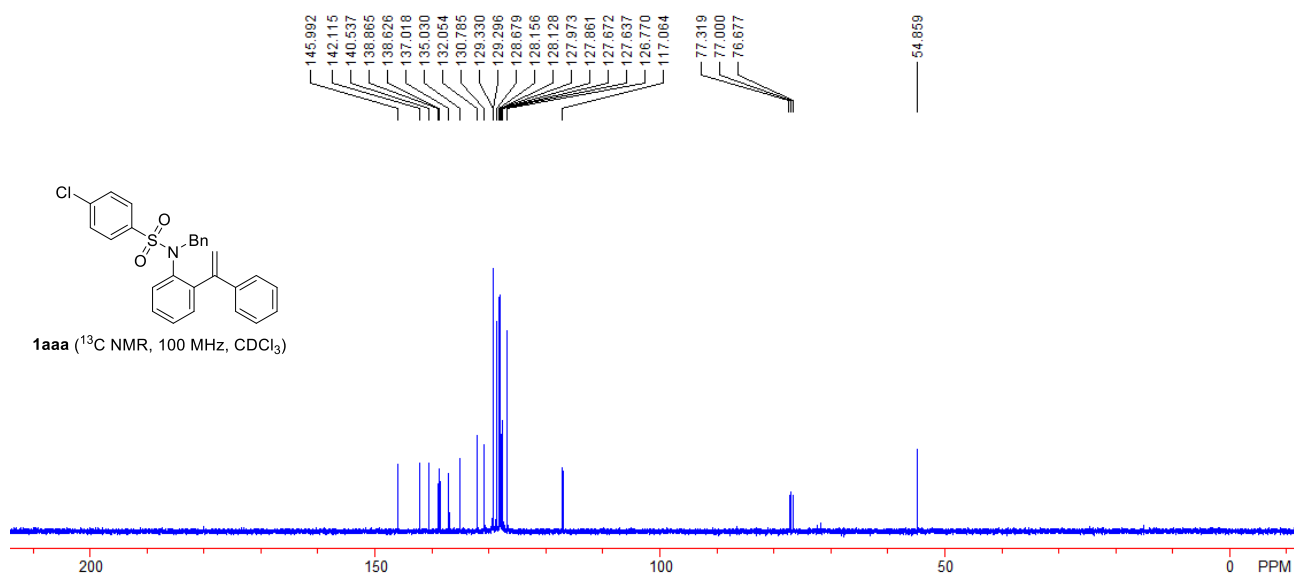

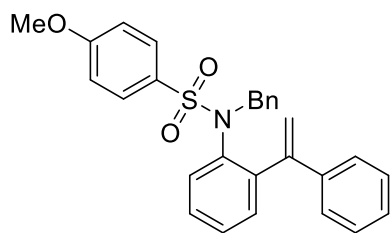

**Compound 1aab:** Yield: 1867 mg, 83%; a yellow oil; Eluent: PE/EA = 5/1.  $^1\text{H}$  NMR (400 MHz,  $\text{CDCl}_3$ , TMS)  $\delta$  3.76 (s, 3H), 4.00-4.60 (m, 2H), 5.12 (s, 1H), 5.64 (s, 1H), 6.80-6.90 (m, 4H), 6.97 (d,  $J$  = 7.6 Hz, 1H), 7.02-7.28 (m, 11H), 7.51 (d,  $J$  = 8.8 Hz, 2H);  $^{13}\text{C}\{^1\text{H}\}$ -NMR (101 MHz,  $\text{CDCl}_3$ , TMS)  $\delta_{\text{C}}$  54.6, 55.4, 113.6, 117.0, 126.8, 127.43, 127.45, 127.7, 127.8, 127.9, 128.0, 129.2, 130.0, 130.6, 131.7, 131.9, 135.3, 137.3, 140.7, 142.1, 145.8, 162.6 ; IR (neat):  $\nu$  3059, 3029, 2942, 2839, 1594, 1494, 1441, 1341, 1257, 1150, 1110, 1025, 909, 831, 766, 697  $\text{cm}^{-1}$ ; HRMS (ESI-TOF) Calcd for  $\text{C}_{28}\text{H}_{25}\text{NO}_3\text{NaS}$   $[\text{M}+\text{Na}]^+$ : 478.1447, found: 478.1460.

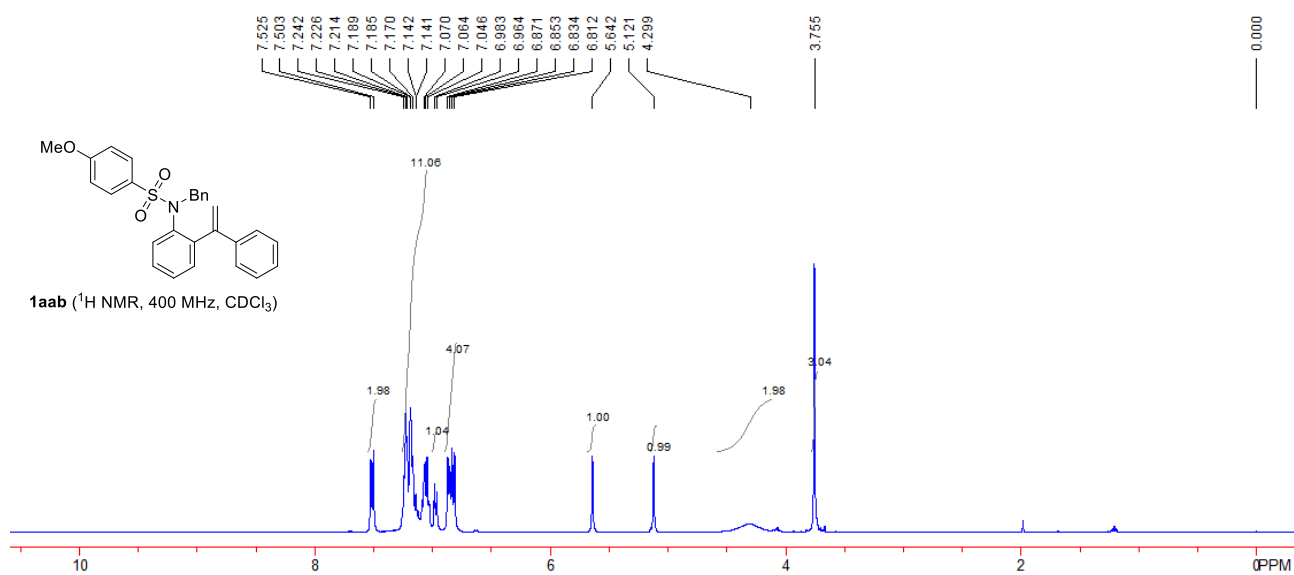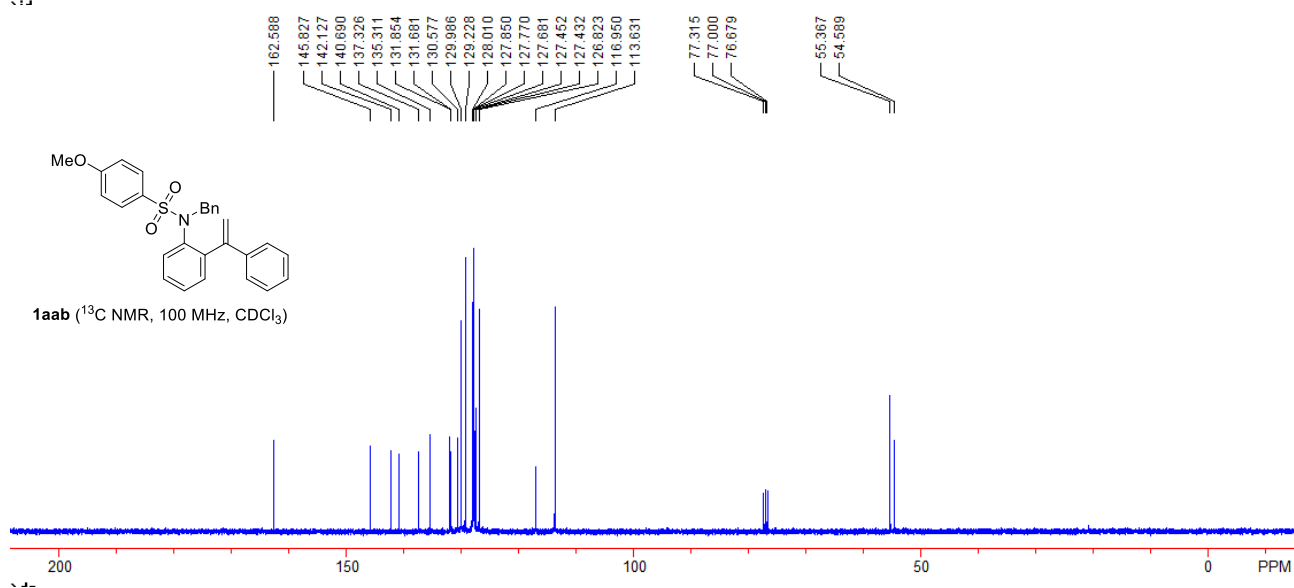

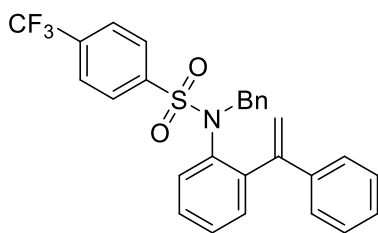

**Compound 1aac:** Yield: 2082 mg, 85%; a light yellow solid; Mp: 109-111 °C; Eluent: PE/EA = 10/1.  $^1\text{H}$  NMR (400 MHz,  $\text{CDCl}_3$ , TMS)  $\delta$  3.90-4.70 (m, 2H), 5.10 (s, 1H), 5.63 (s, 1H), 6.86 (d,  $J$  = 6.8 Hz, 2H), 6.94 (d,  $J$  = 8.0 Hz, 1H), 7.00-7.35 (m, 11H), 7.55 (d,  $J$  = 8.0 Hz, 2H), 7.64 (d,  $J$  = 8.0 Hz, 2H);  $^{13}\text{C}\{^1\text{H}\}$ -NMR (101 MHz,  $\text{CDCl}_3$ , TMS)  $\delta_{\text{C}}$  55.0, 117.0, 123.2 (q,  $J$  = 271.5 Hz), 125.5, (q,  $J$  = 3.6 Hz), 126.7, 127.74, 127.75, 127.97, 127.99, 128.20, 128.28, 128.31, 129.3, 130.9, 132.1, 133.6 (q,  $J$  = 32.7 Hz), 134.8, 136.9, 140.5, 142.1, 144.0, 146.1;  $^{19}\text{F}$  NMR (376 MHz,  $\text{CDCl}_3$ )  $\delta$  -62.8; IR (neat):  $\nu$  3103, 2982, 1608, 1487, 1443, 1374, 1352, 1321, 1201, 1121, 1108, 1061, 990, 880, 770, 697  $\text{cm}^{-1}$ ; HRMS (ESI-TOF) Calcd for  $\text{C}_{28}\text{H}_{22}\text{NO}_2\text{F}_3\text{NaS}$   $[\text{M}+\text{Na}]^+$ : 516.1216, found: 516.1216.

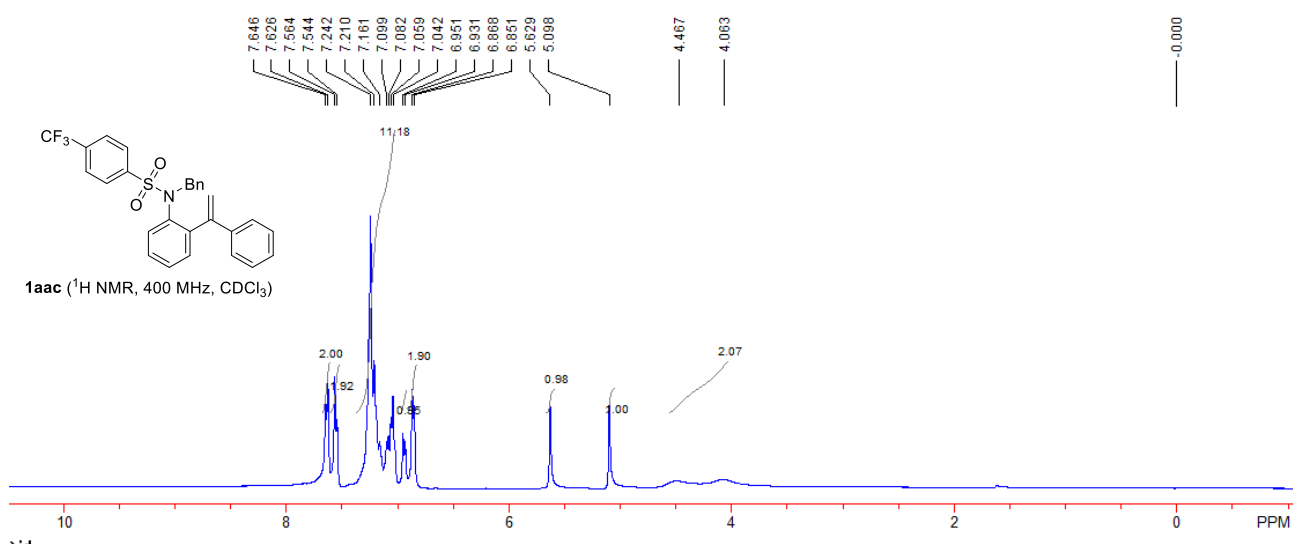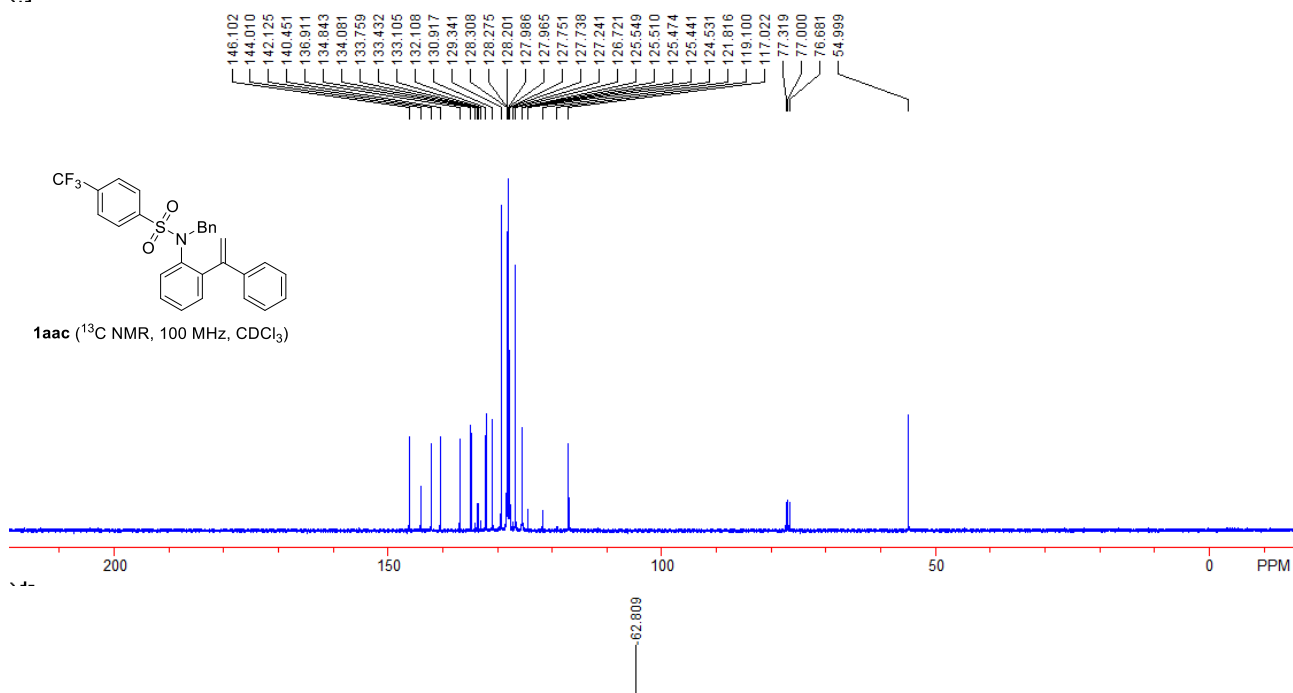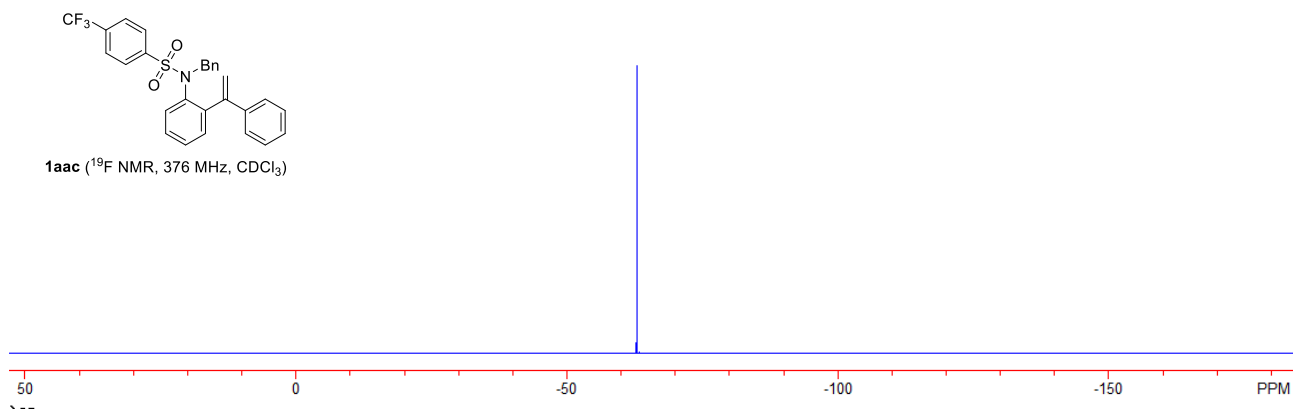

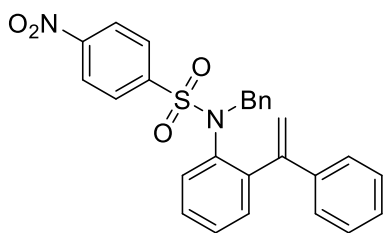

**Compound 1aad:** Yield: 1567 mg, 78%; a yellow oil; Eluent: PE/EA = 5/1.  $^1\text{H}$  NMR (400 MHz,  $\text{CDCl}_3$ , TMS)  $\delta$  3.90-4.80 (m, 2H), 5.13 (s, 1H), 5.66 (s, 1H), 6.85-6.95 (m, 3H), 7.06 (t,  $J = 7.2$  Hz, 2H), 7.10-7.33 (m, 9H), 7.62 (d,  $J = 8.8$  Hz, 2H), 8.08 (d,  $J = 8.8$  Hz, 2H);  $^{13}\text{C}\{^1\text{H}\}$ -NMR (101 MHz,  $\text{CDCl}_3$ , TMS)  $\delta_{\text{C}}$  55.3, 117.1, 123.5, 126.6, 127.76, 127.85, 128.0, 128.2, 128.4, 128.8, 129.4, 130.8, 132.2, 134.6, 136.7, 140.2, 141.9, 145.97, 146.01, 149.3; IR (neat):  $\nu$  3102, 3063, 3029, 2986, 1605, 1526, 1493, 1346, 1309, 1159, 1088, 1027, 910, 852, 767, 738  $\text{cm}^{-1}$ ; HRMS (ESI-TOF) Calcd for  $\text{C}_{27}\text{H}_{22}\text{N}_2\text{O}_4\text{NaS}$   $[\text{M}+\text{Na}]^+$ : 493.1193, found: 493.1191.

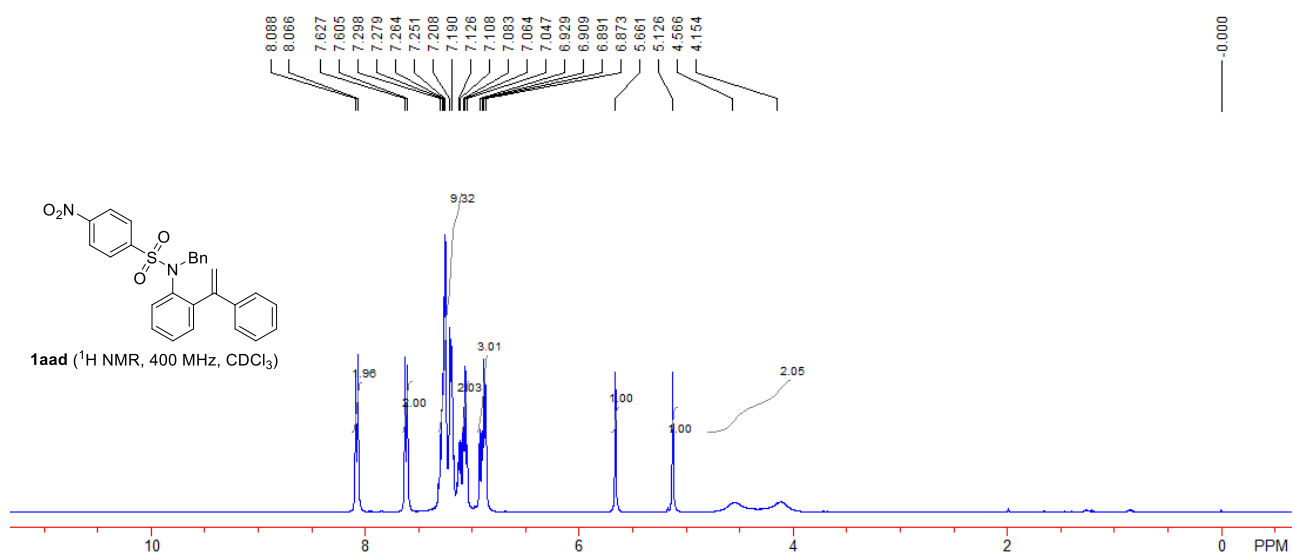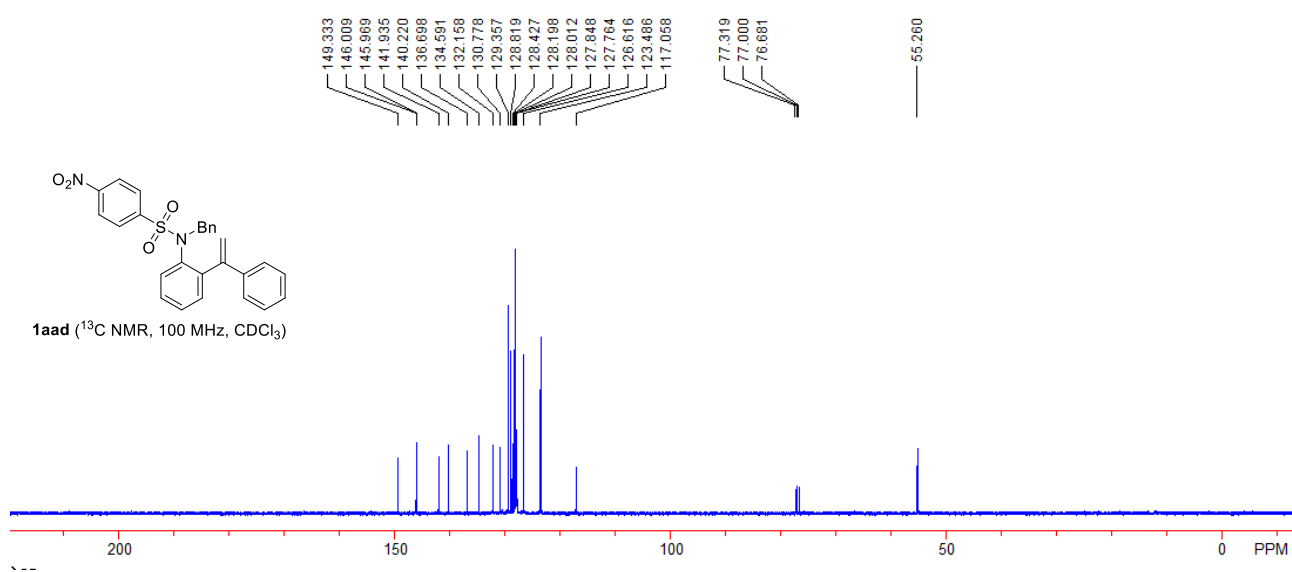

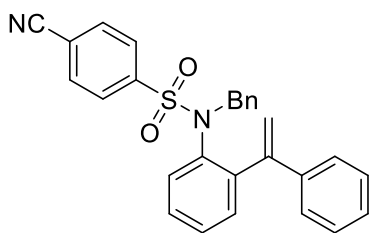

**Compound 1aae:** Yield: 1315 mg, 52%; a yellow oil; Eluent: PE/EA = 5/1.  $^1\text{H}$  NMR (400 MHz,  $\text{CDCl}_3$ , TMS)  $\delta$  3.80-4.70 (m, 2H), 5.10 (s, 1H), 5.65 (s, 1H), 6.83-6.92 (m, 3H), 7.08 (t,  $J = 7.2$  Hz, 2H), 7.13 (d,  $J = 6.8$  Hz, 1H), 7.15-7.35 (m, 8H), 7.54-7.58 (m, 4H);  $^{13}\text{C}\{^1\text{H}\}$ -NMR (101 MHz,  $\text{CDCl}_3$ , TMS)  $\delta_{\text{C}}$  55.2, 115.6, 117.1, 117.3, 126.6, 127.78, 127.84, 128.00, 128.02, 128.2, 128.4, 129.3, 130.8, 132.1, 134.6, 136.8, 140.3, 142.0, 144.5, 146.0; IR (neat):  $\nu$  3028, 2987, 2231, 1595, 1486, 1445, 1347, 1181, 1157, 1087, 1027, 910, 829, 766, 698  $\text{cm}^{-1}$ ; HRMS (ESI-TOF) Calcd for  $\text{C}_{28}\text{H}_{22}\text{N}_2\text{O}_2\text{NaS}$   $[\text{M}+\text{Na}]^+$ : 473.1294, found: 473.1303.

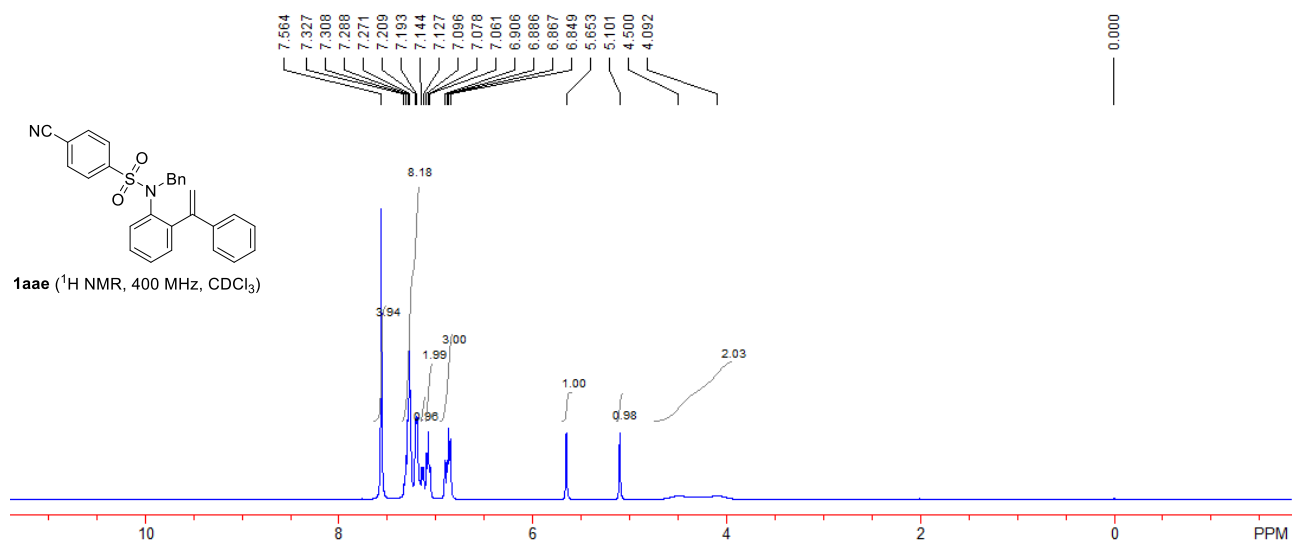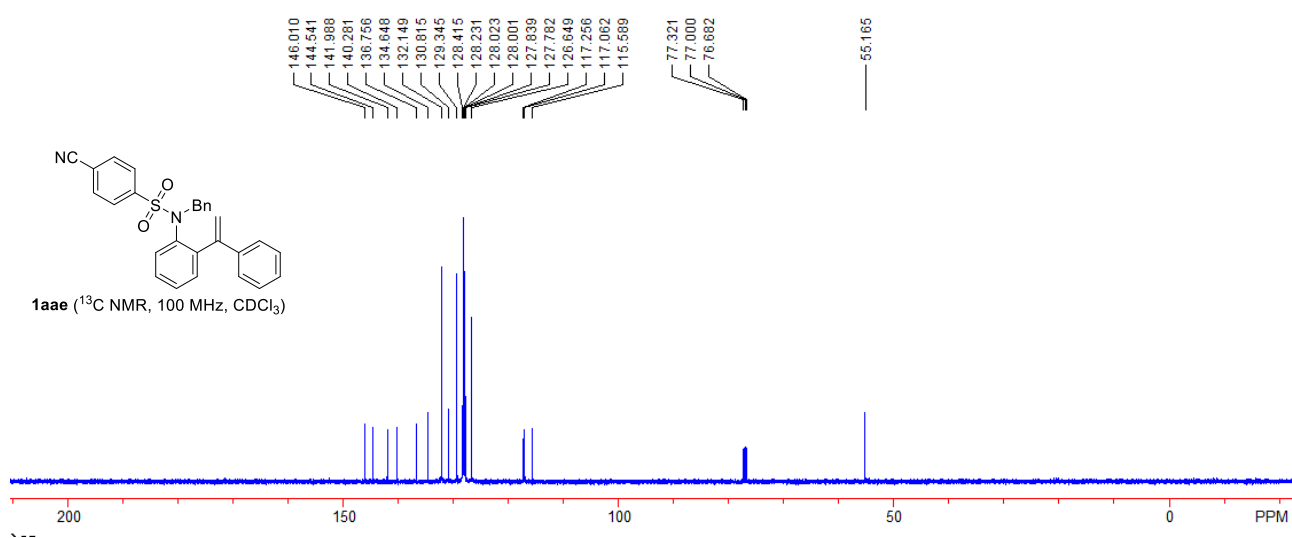

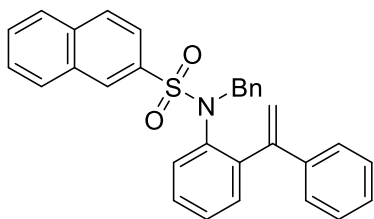

**Compound 1aaf:** Yield: 1809 mg, 74%; a yellow oil; Eluent: PE/EA = 10/1.  $^1\text{H}$  NMR (400 MHz,  $\text{CDCl}_3$ , TMS)  $\delta$  4.00-4.80 (m, 2H), 5.09 (s, 1H), 5.58 (s, 1H), 6.88 (d,  $J = 7.2$  Hz, 2H), 6.96 (d,  $J = 8.0$  Hz, 1H), 6.98-7.08 (m, 3H), 7.10-7.28 (m, 8H), 7.48-7.61 (m, 3H), 7.75-7.87 (m, 3H), 8.20 (s, 1H);  $^{13}\text{C}\{^1\text{H}\}$ -NMR (101 MHz,  $\text{CDCl}_3$ , TMS)  $\delta_{\text{C}}$  54.8, 117.1, 123.2, 126.9, 127.2, 127.57, 127.60, 127.64, 127.8, 127.9, 128.0, 128.1, 128.6, 128.7, 129.1, 129.2, 129.3, 131.0, 131.8, 132.0, 134.5, 135.3, 137.2, 137.3, 140.7, 142.3, 145.8; IR (neat):  $\nu$  3053, 3026, 2986, 2920, 1596, 1509, 1441, 1361, 1305, 1276, 1212, 1156, 1115, 1085, 1037, 998, 891, 784, 705  $\text{cm}^{-1}$ ; HRMS (ESI-TOF) Calcd for  $\text{C}_{31}\text{H}_{25}\text{NO}_2\text{NaS}$   $[\text{M}+\text{Na}]^+$ : 498.1498, found: 498.1504.

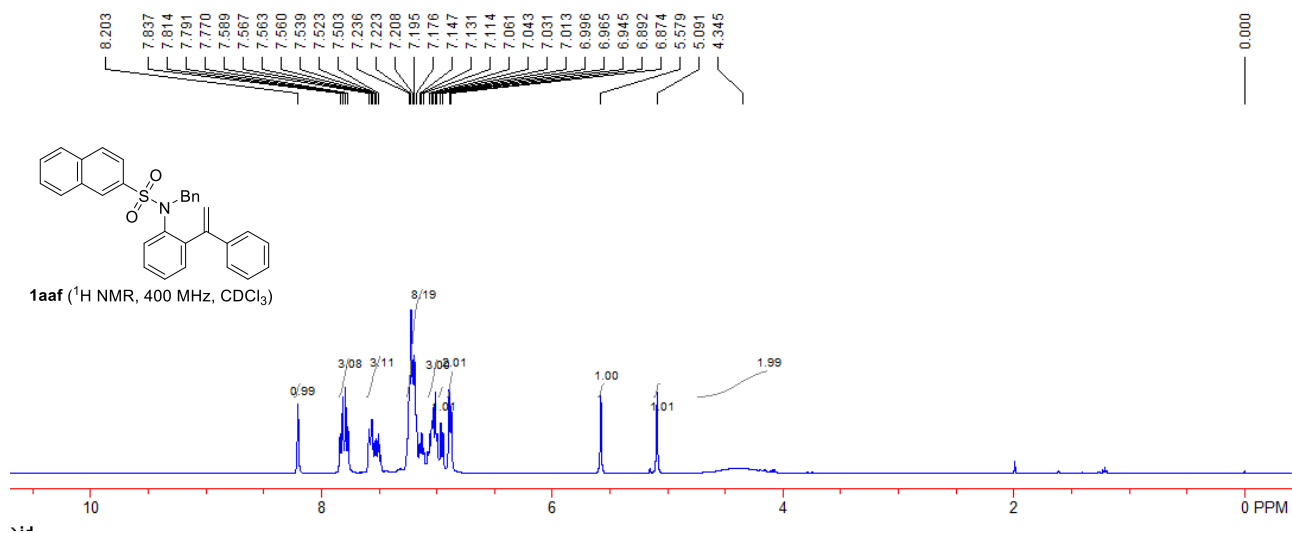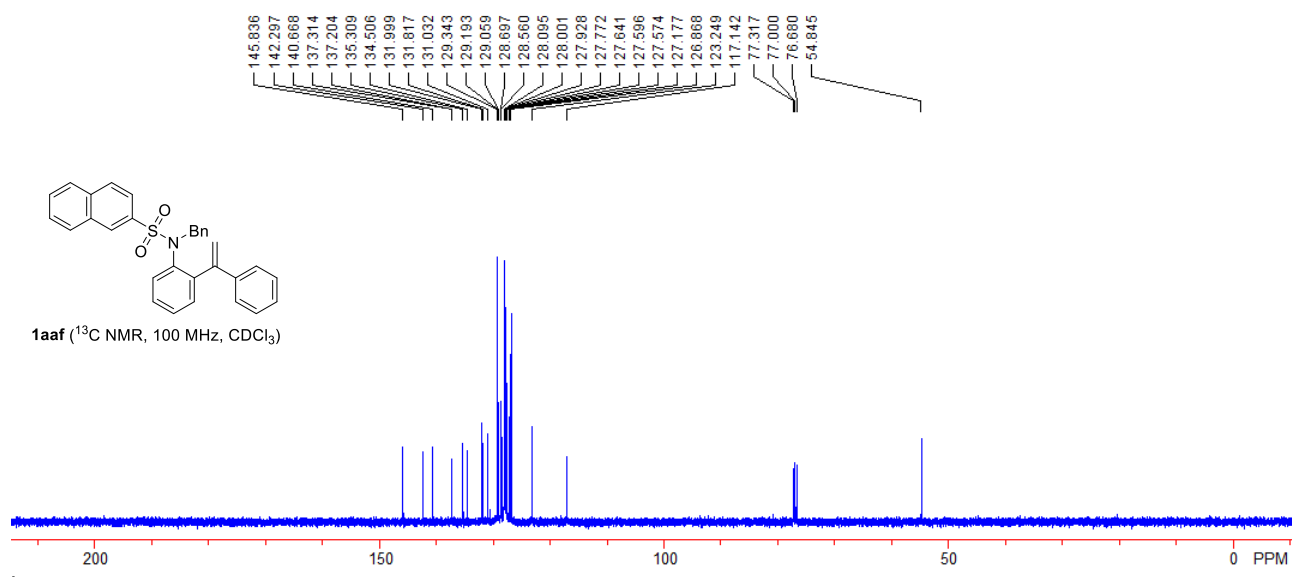

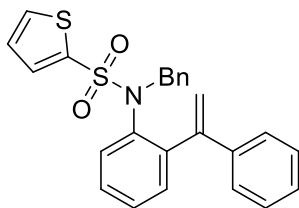

**Compound 1aag:** Yield: 1518 mg, 60%; a yellow oil; Eluent: PE/EA = 10/1.  $^1\text{H}$  NMR (400 MHz,  $\text{CDCl}_3$ , TMS)  $\delta$  4.00-4.80 (m, 2H), 5.20 (s, 1H), 5.69 (s, 1H), 6.86 (d,  $J = 6.8$  Hz, 2H), 6.90-6.97 (m, 2H), 7.02-7.26 (m, 11H), 7.31-7.35 (m, 1H), 7.43-7.48 (m, 1H);  $^{13}\text{C}\{^1\text{H}\}$ -NMR (101 MHz,  $\text{CDCl}_3$ , TMS)  $\delta_{\text{C}}$  54.6, 117.2, 126.9, 127.0, 127.5, 127.65, 127.75, 127.95, 128.02, 128.04, 129.2, 130.3, 131.87, 131.91, 132.7, 134.9, 136.9, 140.6, 141.0, 142.3, 145.6; IR (neat):  $\nu$  3059, 3028, 2917, 1597, 1493, 1441, 1403, 1348, 1224, 1150, 1091, 1015, 909, 864, 766, 730  $\text{cm}^{-1}$ ; HRMS (ESI-TOF) Calcd for  $\text{C}_{25}\text{H}_{21}\text{NO}_2\text{NaS}_2$   $[\text{M}+\text{Na}]^+$ : 454.0906, found: 454.0911.

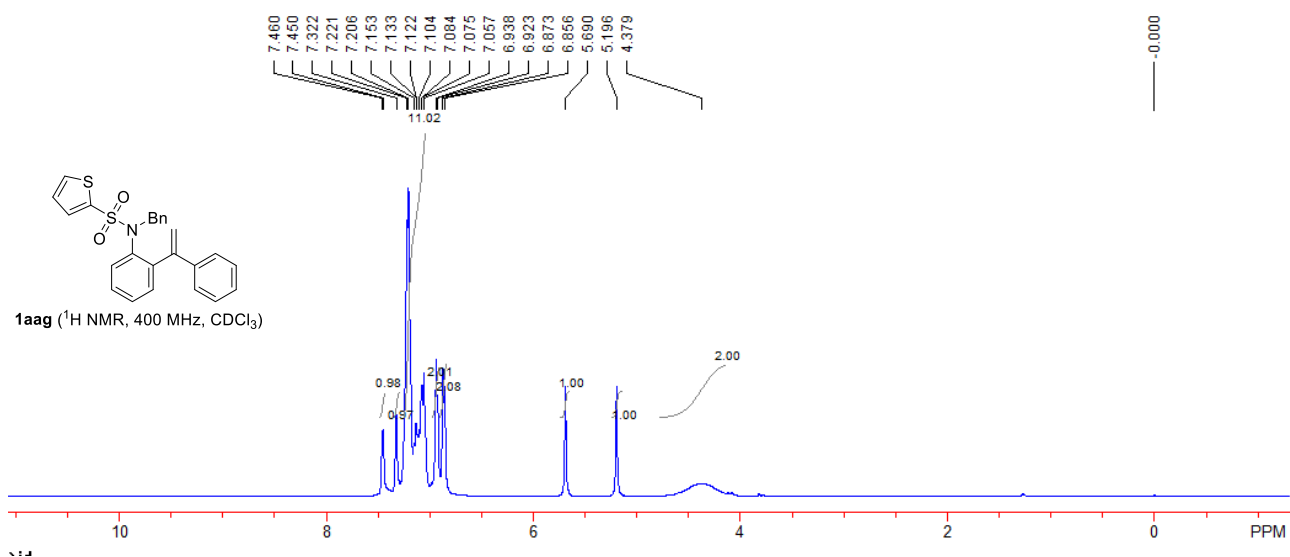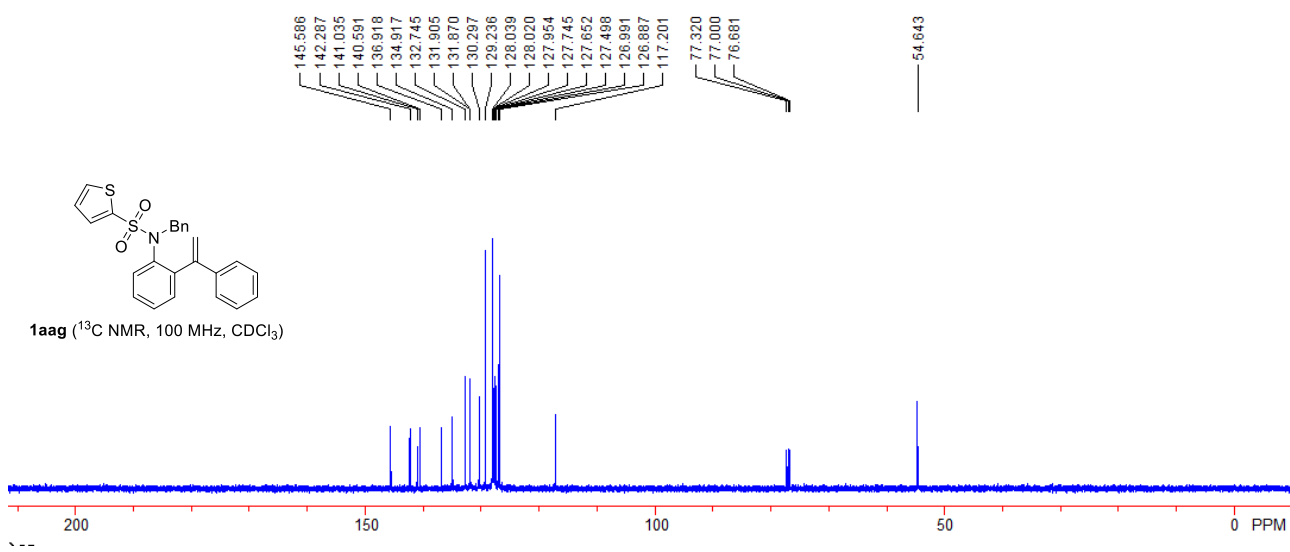

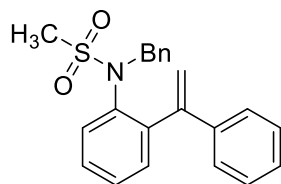

**Compound 1aah:** Yield: 1015 mg, 90%; a light yellow solid; Mp: 80-82 °C; Eluent: PE/EA = 10/1. <sup>1</sup>H NMR (400 MHz, CDCl<sub>3</sub>, TMS) δ 2.31 (s, 3H), 4.00-4.60 (m, 2H), 5.35 (s, 1H), 5.78 (s, 1H), 7.04 (d, *J* = 8.0 Hz, 1H), 7.07-7.13 (m, 2H), 7.17-7.24 (m, 4H), 7.25-7.35 (m, 7H); <sup>13</sup>C{<sup>1</sup>H}-NMR (101 MHz, CDCl<sub>3</sub>, TMS) δ<sub>C</sub> 40.6, 54.3, 117.0, 126.7, 127.86, 127.93, 128.08, 128.18, 128.21, 128.4, 129.5, 131.7, 131.9, 135.4, 137.3, 140.8, 141.3, 147.7; IR (neat): ν 3083, 3064, 3026, 3006, 2940, 1595, 1490, 1445, 1368, 1269, 1201, 1145, 1086, 1027, 964, 866, 785, 712, 699 cm<sup>-1</sup>; HRMS (ESI-TOF) Calcd for C<sub>22</sub>H<sub>21</sub>NO<sub>2</sub>NaS [M+Na]<sup>+</sup>: 386.1185, found: 386.1194.

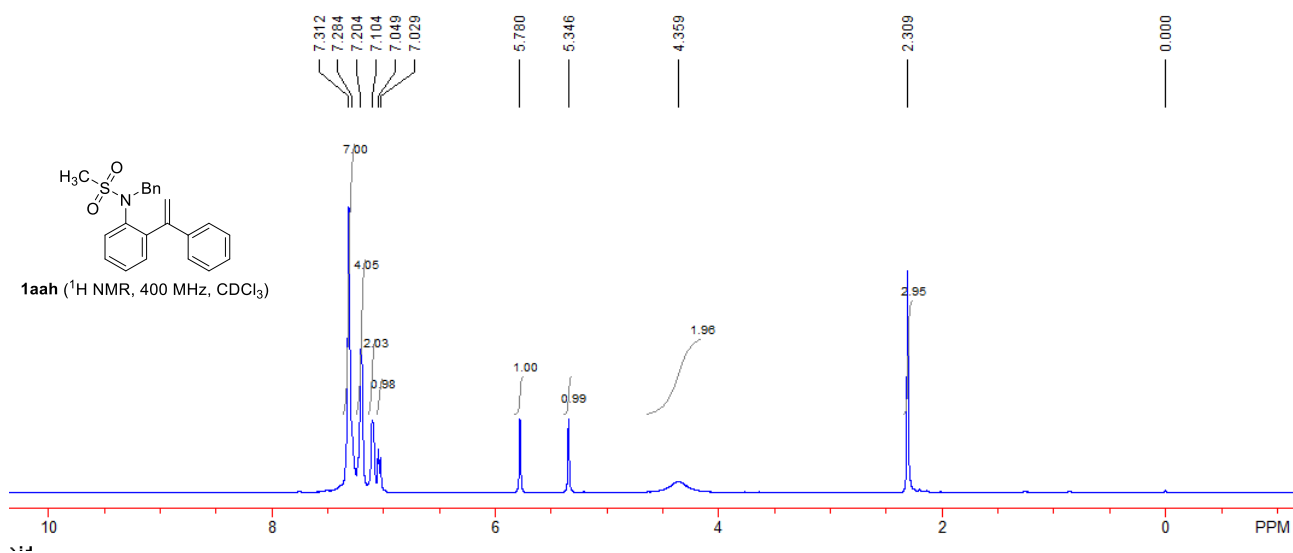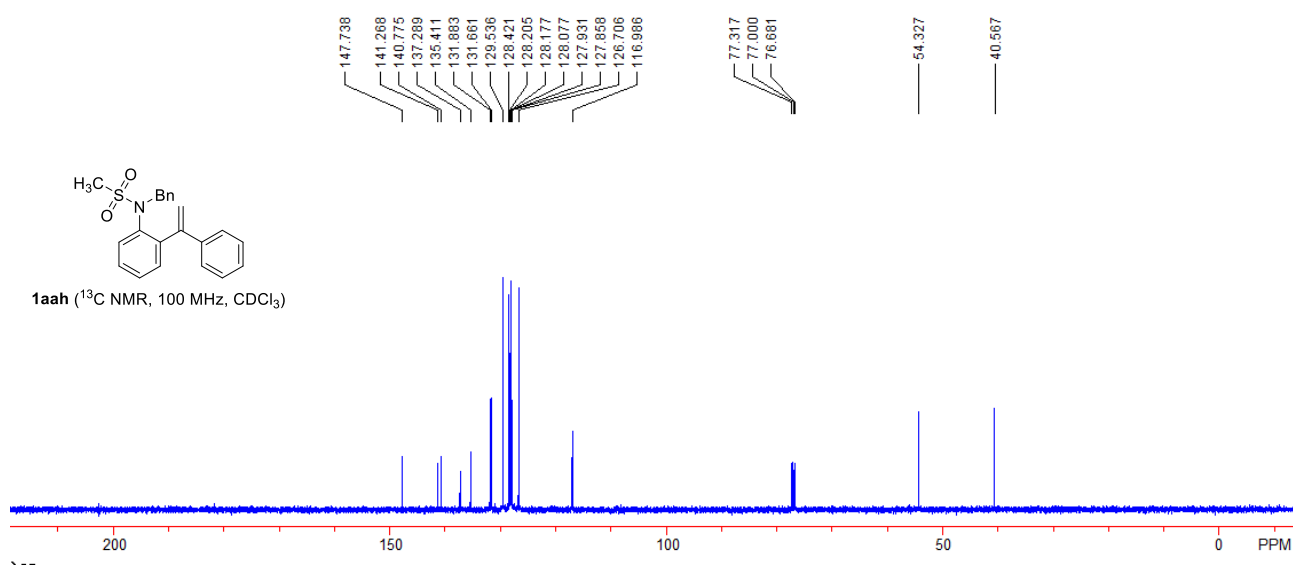

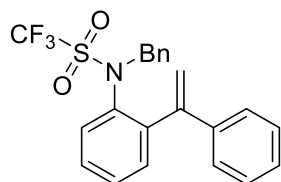

**Compound 1aai:** Yield: 1244 mg, 67%; a yellow oil; Eluent: PE/EA = 10/1.  $^1\text{H}$  NMR (400 MHz,  $\text{CDCl}_3$ , TMS)  $\delta$  3.90-4.10 (m, 1H), 4.46-4.48 (m, 1H), 5.37 (s, 1H), 5.86 (s, 1H), 6.85 (d,  $J = 7.6$  Hz, 1H), 6.95 (d,  $J = 6.4$  Hz, 2H), 7.12-7.26 (m, 4H), 7.27-7.40 (m, 7H);  $^{13}\text{C}\{^1\text{H}\}$ -NMR (101 MHz,  $\text{CDCl}_3$ , TMS)  $\delta_{\text{C}}$  55.5, 118.4, 119.8 (q,  $J = 321.6$  Hz), 127.1, 128.2, 128.25, 128.39, 128.48, 128.49, 129.2, 129.6, 131.8, 132.3, 133.8, 134.5, 140.2, 142.1, 145.9;  $^{19}\text{F}$  NMR (376 MHz,  $\text{CDCl}_3$ )  $\delta$  -74.2; IR (neat):  $\nu$  3063, 3031, 2926, 2859, 1600, 1494, 1389, 1223, 1186, 1139, 1040, 1027, 911, 765, 696  $\text{cm}^{-1}$ ; HRMS (FI-TOF) Calcd for  $\text{C}_{22}\text{H}_{18}\text{NO}_2\text{F}_3\text{S}$   $[\text{M}]^+$ : 417.1005, found: 417.1007.

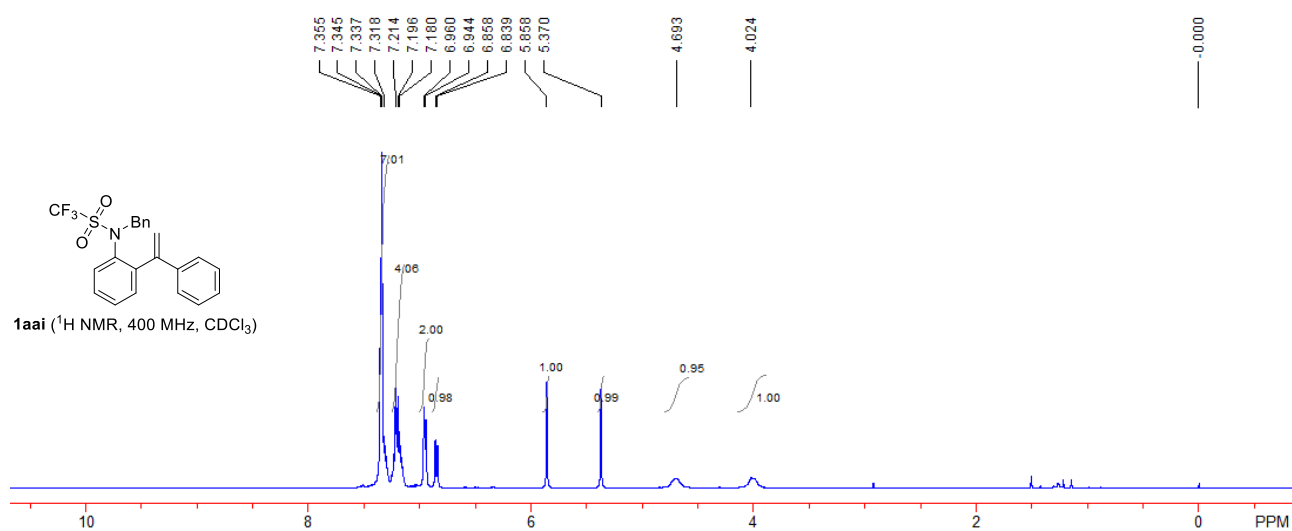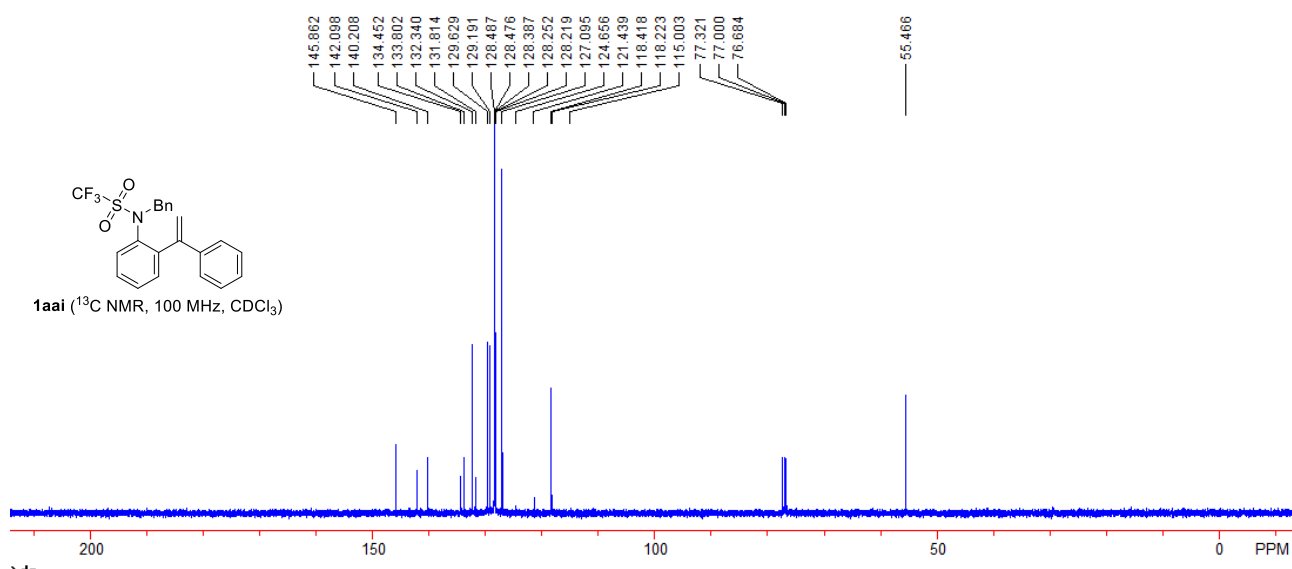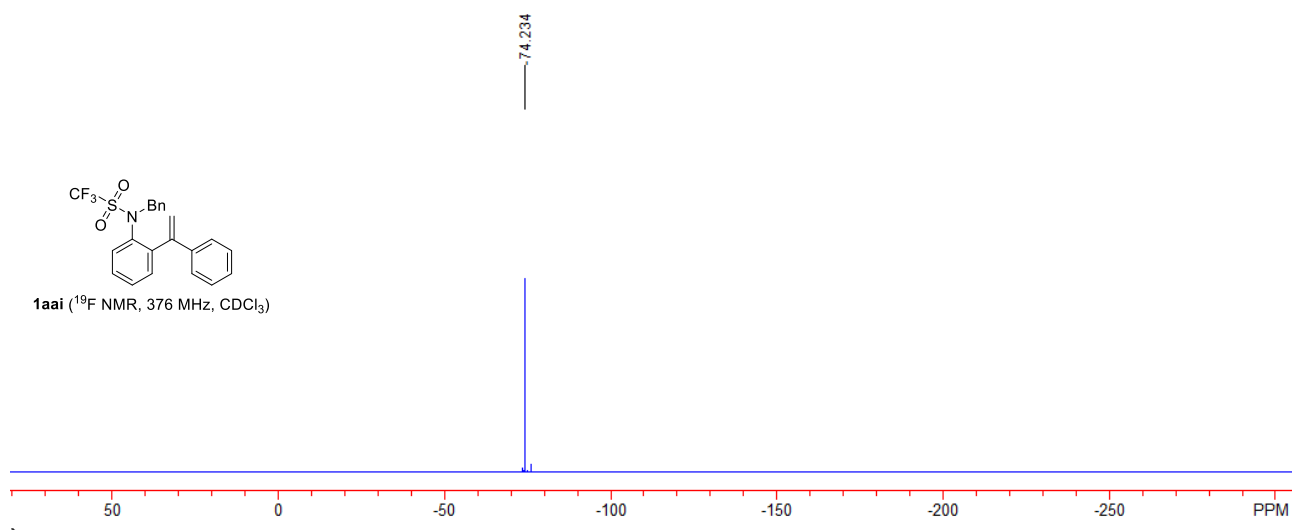

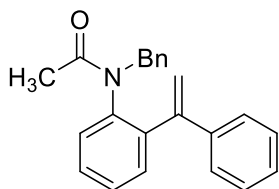

**Compound 1aaj:** Yield: 1076 mg, 81%; a yellow oil; Eluent: PE/EA = 10/1.  $^1\text{H}$  NMR (400 MHz,  $\text{CDCl}_3$ , TMS)  $\delta$  1.64 (s, 3H), 3.44 (d,  $J = 14.4$  Hz, 1H), 5.26 (d,  $J = 14.4$  Hz, 1H), 5.32 (s, 1H), 5.65 (s, 1H), 6.65 (d,  $J = 7.6$  Hz, 1H), 7.09 (d,  $J = 7.2$  Hz, 2H), 7.12-7.22 (m, 4H), 7.24-7.36 (m, 6H), 7.43 (d,  $J = 6.8$  Hz, 1H);  $^{13}\text{C}\{^1\text{H}\}$ -NMR (101 MHz,  $\text{CDCl}_3$ , TMS)  $\delta_{\text{C}}$  22.2, 50.4, 117.1, 126.6, 126.9, 127.90, 127.95, 127.98, 128.2, 128.4, 128.6, 130.1, 131.4, 137.4, 139.9, 140.0, 140.5, 148.1, 169.9; IR (neat):  $\nu$  3060, 3027, 2931, 1655, 1485, 1448, 1384, 1358, 1319, 1253, 1069, 1027, 907, 766, 699  $\text{cm}^{-1}$ ; HRMS (ESI-TOF) Calcd for  $\text{C}_{23}\text{H}_{21}\text{NONa}$   $[\text{M}+\text{Na}]^+$ : 350.1515, found: 350.1511.

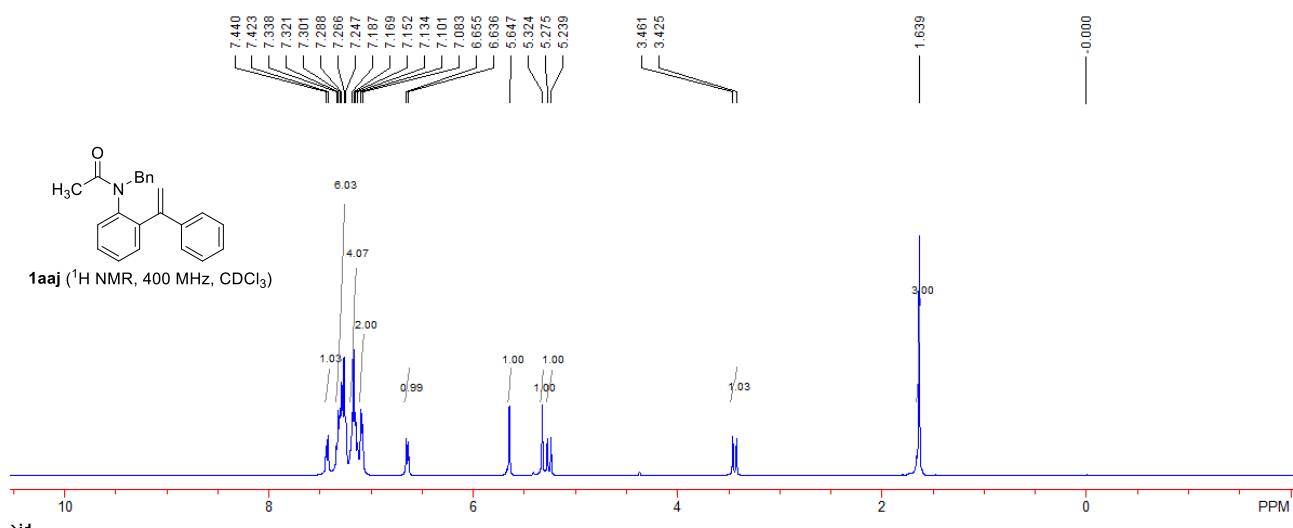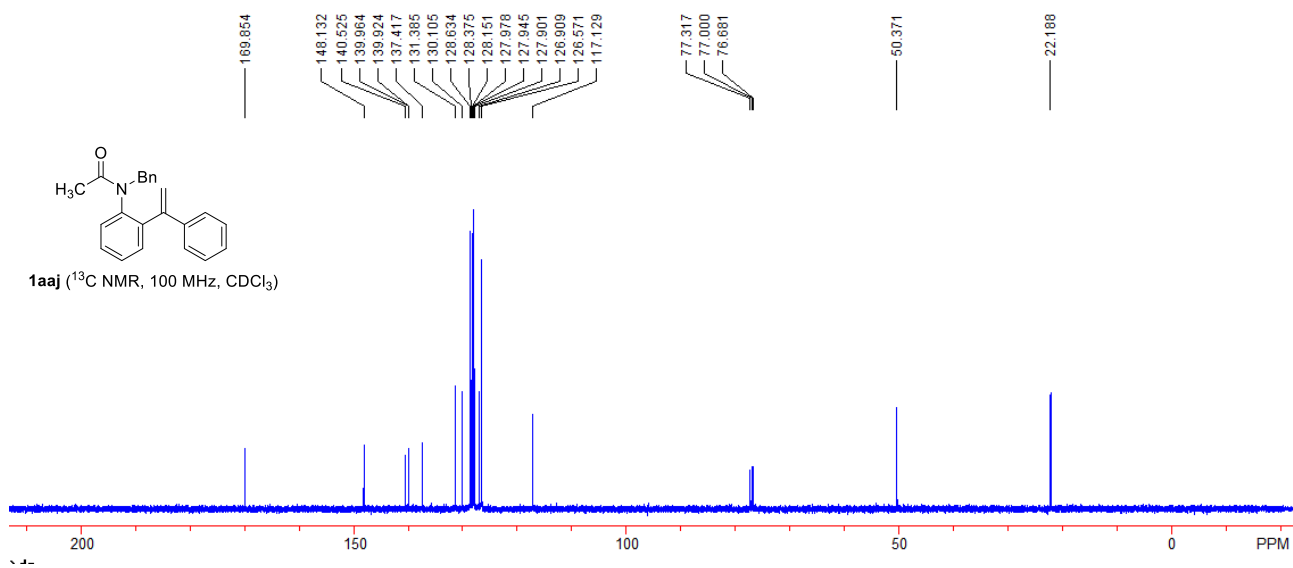

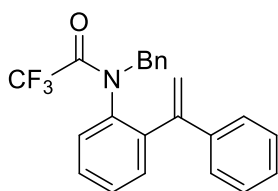

**Compound 1aak:** Yield: 1116 mg, 83%; a yellow oil; Eluent: PE/EA = 10/1.  $^1\text{H}$  NMR (400 MHz,  $\text{CDCl}_3$ , TMS)  $\delta$  3.58 (d,  $J$  = 14.0 Hz, 1.00H), 4.26 (d,  $J$  = 15.6 Hz, 0.15H), 4.85 (d,  $J$  = 15.6 Hz, 0.15H), 5.21 (d,  $J$  = 14.4 Hz, 1.00H), 5.35-5.40 (m, 1.15H), 5.72-5.80 (m, 1.15H), 6.66-6.74 (m, 1.15H), 6.96-7.10 (m, 2.30H), 7.11-7.46 (m, 12.65H);  $^{13}\text{C}\{^1\text{H}\}$ -NMR (101 MHz,  $\text{CDCl}_3$ , TMS)  $\delta_{\text{C}}$  52.5, 53.0, 116.2 (q,  $J$  = 287.0 Hz), 116.9, 118.3, 126.6, 126.9, 127.9, 128.1, 128.16, 128.29, 128.32, 128.35, 128.43, 128.46, 128.53, 129.07, 129.09, 129.95, 129.96, 130.8, 131.72, 131.74, 135.4, 136.5, 139.6, 140.4, 146.8, 147.2, 157.1 (q,  $J$  = 35.3 Hz);  $^{19}\text{F}$  NMR (376 MHz,  $\text{CDCl}_3$ )  $\delta$  -68.1, -67.1; IR (neat):  $\nu$  3062, 3030, 2950, 1687, 1487, 1449, 1418, 1357, 1201, 1174, 1146, 1078, 908, 766, 732, 696  $\text{cm}^{-1}$ ; HRMS (ESI-TOF) Calcd for  $\text{C}_{23}\text{H}_{18}\text{NOF}_3\text{Na}$   $[\text{M}+\text{Na}]^+$ : 404.1233, found: 404.1229.

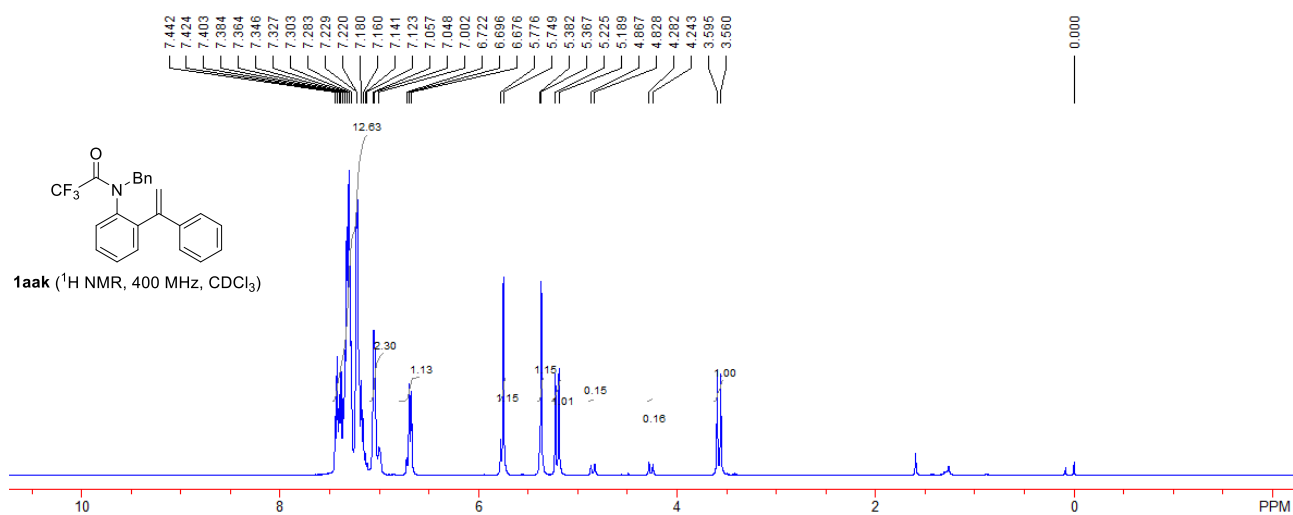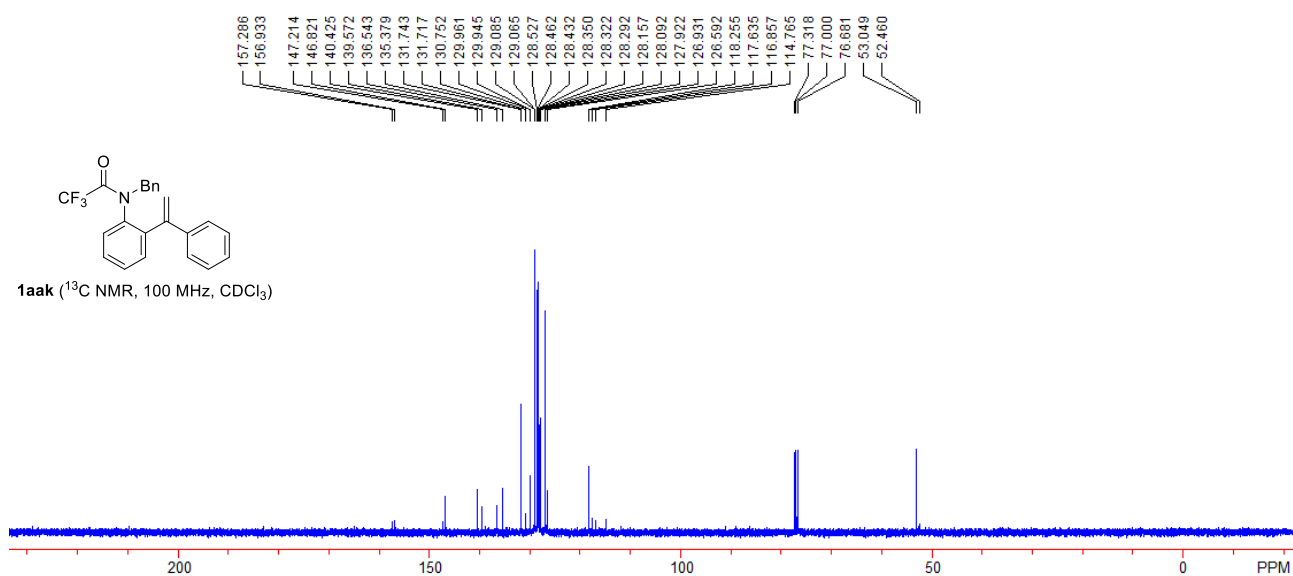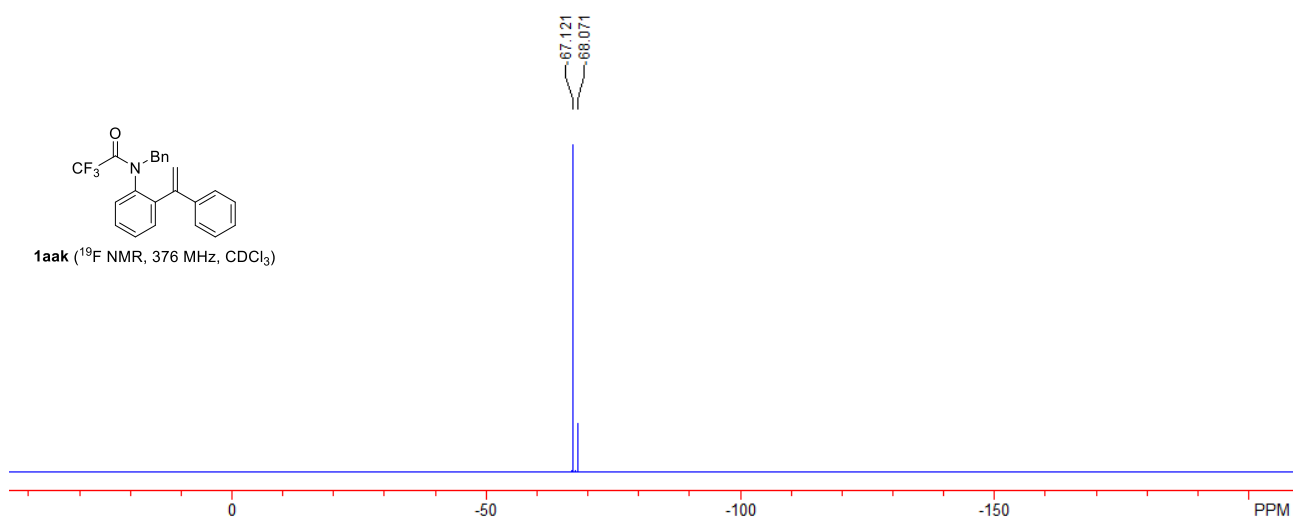

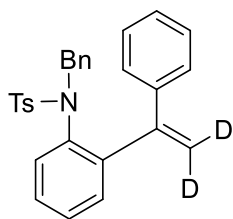

**Compound [D<sub>2</sub>]-1a:** Yield: 2283 mg, 75%, D containing 93%; a yellow oil; Eluent: PE/EA = 30/1. <sup>1</sup>H NMR (400 MHz, CDCl<sub>3</sub>, TMS) δ 2.32 (s, 3H), 4.00-4.60 (m, 2H), 6.86 (d, *J* = 7.2 Hz, 2H), 6.94 (d, *J* = 7.6 Hz, 1H), 7.00-7.09 (m, 3H), 7.10-7.26 (m, 10H), 7.50 (d, *J* = 8.0 Hz, 2H); <sup>13</sup>C{<sup>1</sup>H}-NMR (101 MHz, CDCl<sub>3</sub>, TMS) δ<sub>C</sub> 21.2, 54.5, 126.8, 127.38, 127.42, 127.6, 127.7, 127.81, 127.84, 128.0, 129.1, 129.2, 130.6, 131.8, 135.2, 137.08, 137.13, 140.6, 142.1, 143.1, 145.5; IR (neat): ν 3059, 3028, 2922, 1597, 1492, 1402, 1342, 1212, 1183, 1106, 1042, 912, 855, 814, 766, 725 cm<sup>-1</sup>; HRMS (ESI-TOF) Calcd for C<sub>28</sub>H<sub>23</sub>NO<sub>2</sub>NaSD<sub>2</sub> [M+Na]<sup>+</sup>: 464.1624, found: 464.1626.

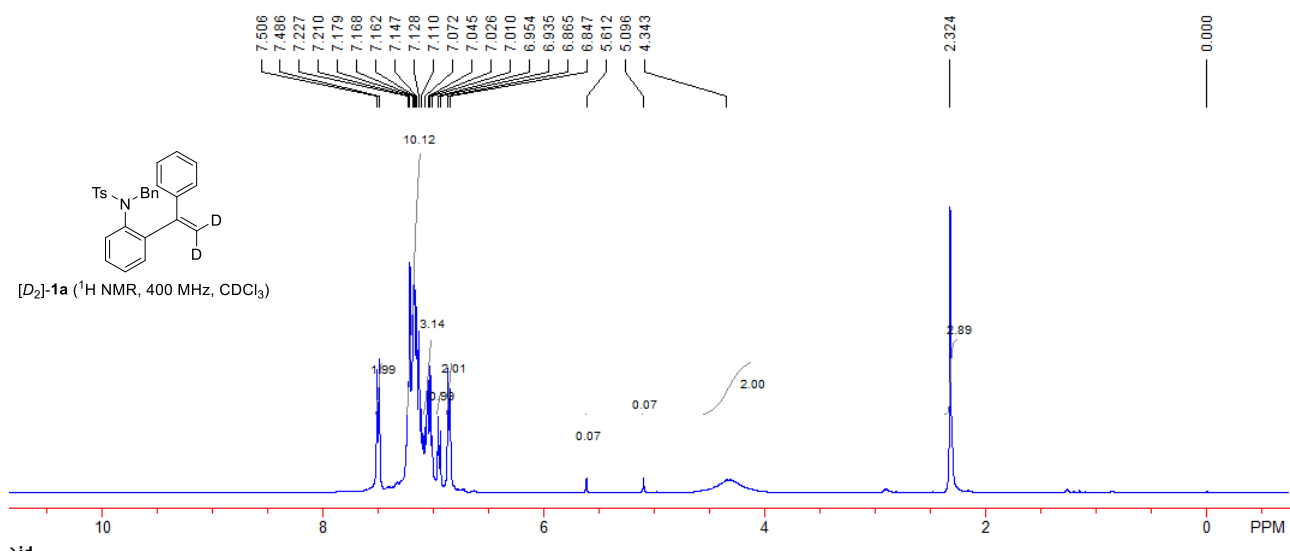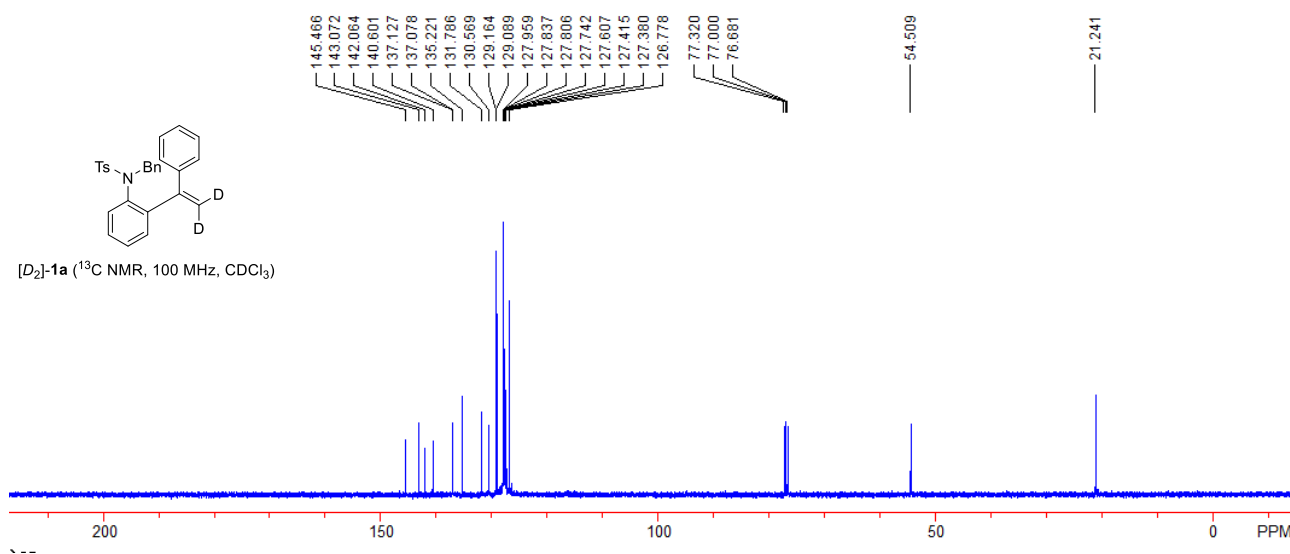

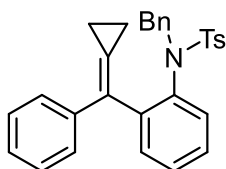

**Compound 1aal:** Yield: 818 mg, 88%; a yellow solid; Mp: 139-141 °C; Eluent: PE/EA = 10/1.  $^1\text{H}$  NMR (400 MHz,  $\text{CDCl}_3$ , TMS)  $\delta$  7.42–7.37 (m, 2H), 7.37–7.29 (m, 6H), 7.28–7.25 (m, 1H), 7.22–7.16 (m, 1H), 7.14–7.08 (m, 3H), 7.07–7.01 (m, 2H), 6.99–6.92 (m, 1H), 6.78–6.67 (m, 2H), 4.15 (s, 2H), 2.39 (s, 3H), 1.48–1.40 (m, 2H), 1.15–1.00 (m, 2H);  $^{13}\text{C}\{^1\text{H}\}$ -NMR (101 MHz,  $\text{CDCl}_3$ , TMS)  $\delta_{\text{C}}$  142.9, 141.9, 140.6, 138.0, 137.9, 135.6, 132.5, 131.5, 129.4, 129.1, 128.2, 128.0, 127.8, 127.7, 127.4, 127.1, 127.0, 126.9, 54.5, 21.5, 5.2, 2.1; IR (neat):  $\nu$  2969, 1597, 1493, 1329, 1155, 1091, 856, 814, 720, 696, 653  $\text{cm}^{-1}$ ; HRMS (ESI-TOF) Calcd for  $\text{C}_{30}\text{H}_{27}\text{NO}_2\text{NaS}$   $[\text{M}+\text{Na}]^+$ : 488.1655, found: 488.1651.

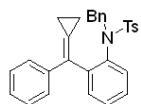

**1aai** ( $^1\text{H}$  NMR, 400 MHz,  $\text{CDCl}_3$ )

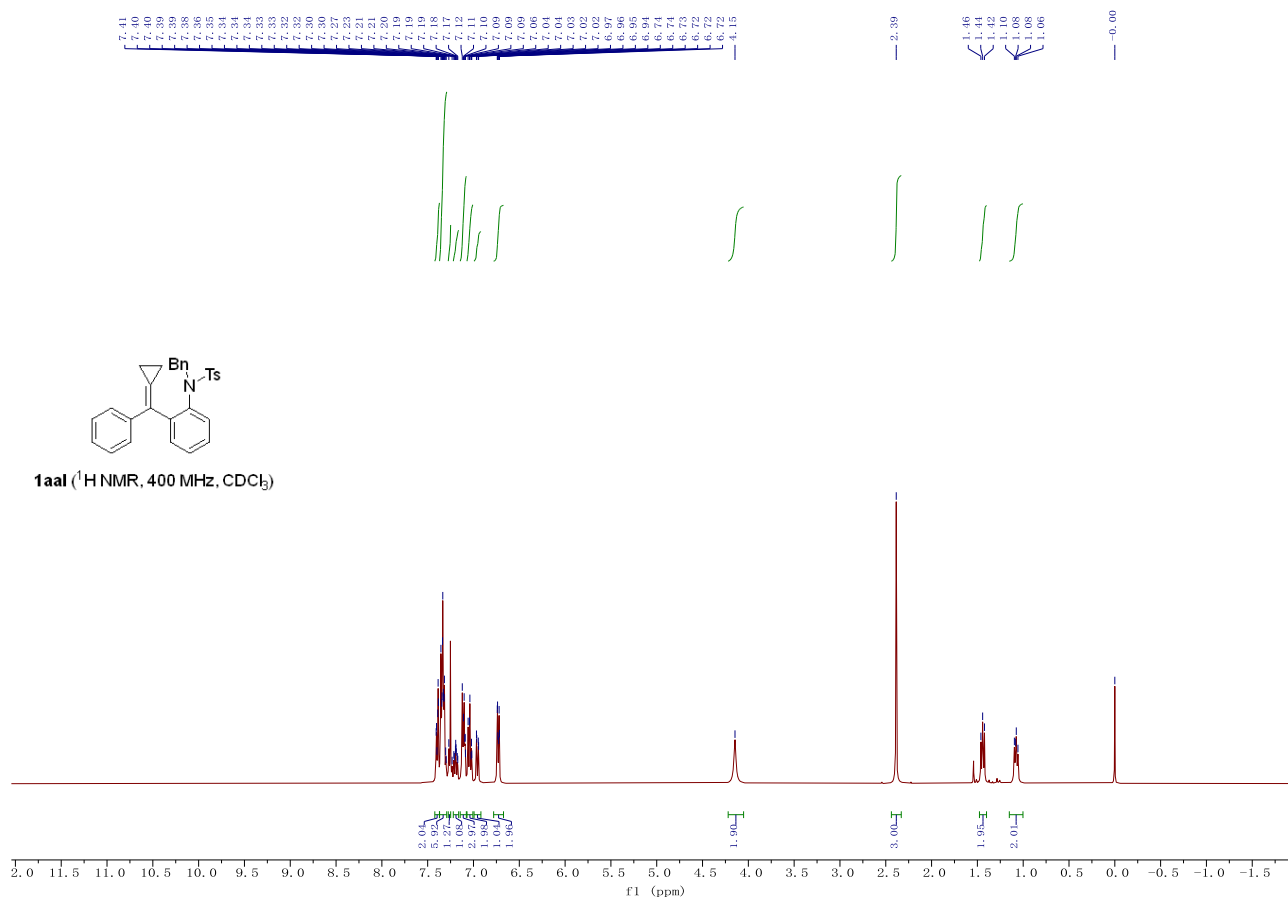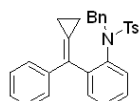

**1aai** ( $^{13}\text{C}$  NMR, 101 MHz,  $\text{CDCl}_3$ )

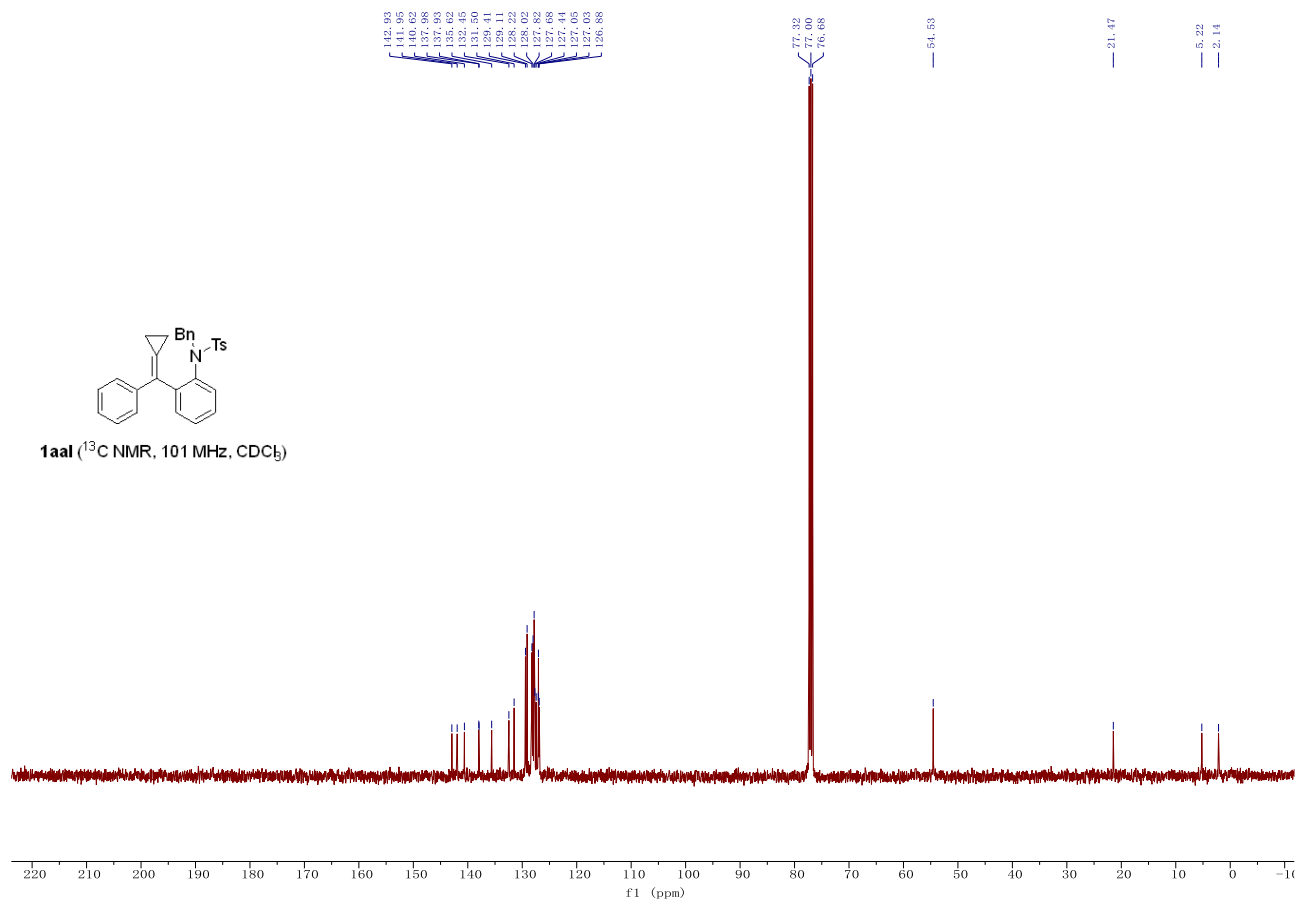

## 9. Characterization Data of Products.

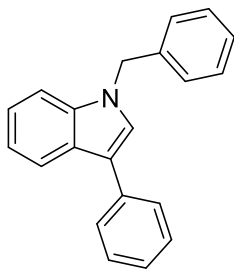

**Compound 2a:**<sup>11</sup> Yield: 25.5 mg, 90%; a yellow oil; Eluent: PE/EA = 20/1. <sup>1</sup>H NMR (400 MHz, CDCl<sub>3</sub>, TMS)  $\delta$  5.30 (s, 2H), 7.14 (d,  $J$  = 7.2 Hz, 2H), 7.17-7.34 (m, 8H), 7.42 (t,  $J$  = 7.2 Hz, 2H), 7.66 (d,  $J$  = 7.6 Hz, 2H), 7.97 (d,  $J$  = 7.6 Hz, 1H); <sup>13</sup>C{<sup>1</sup>H}-NMR (101 MHz, CDCl<sub>3</sub>, TMS)  $\delta$ <sub>C</sub> 50.1, 110.0, 117.3, 120.0, 120.1, 122.1, 125.8, 125.9, 126.4, 126.9, 127.3, 127.7, 128.72, 128.78, 135.5, 137.1, 137.2.

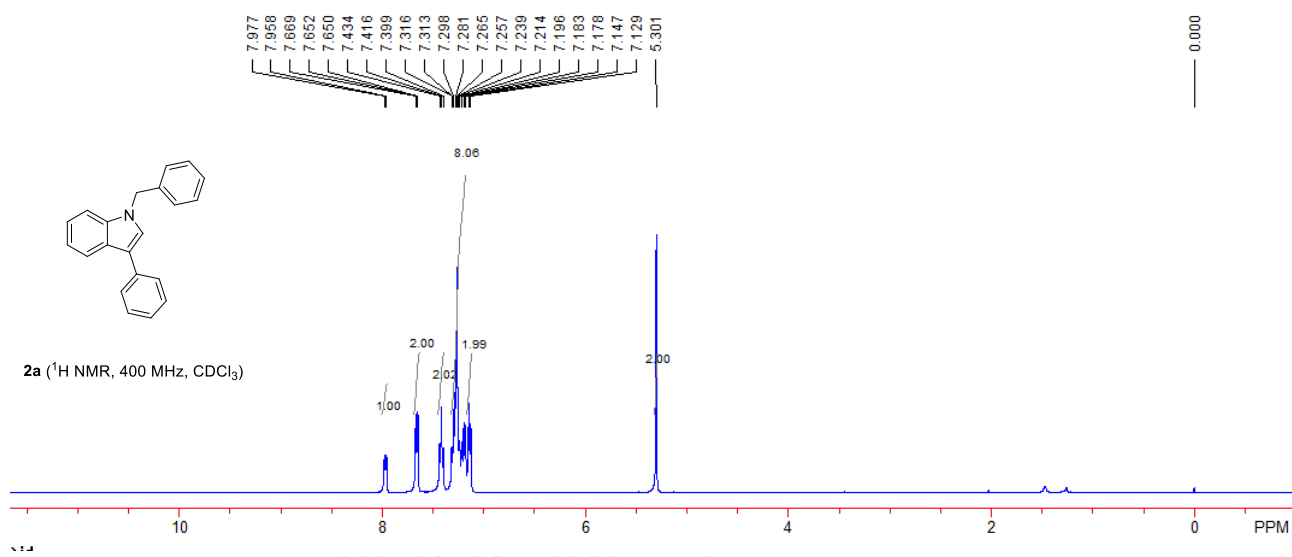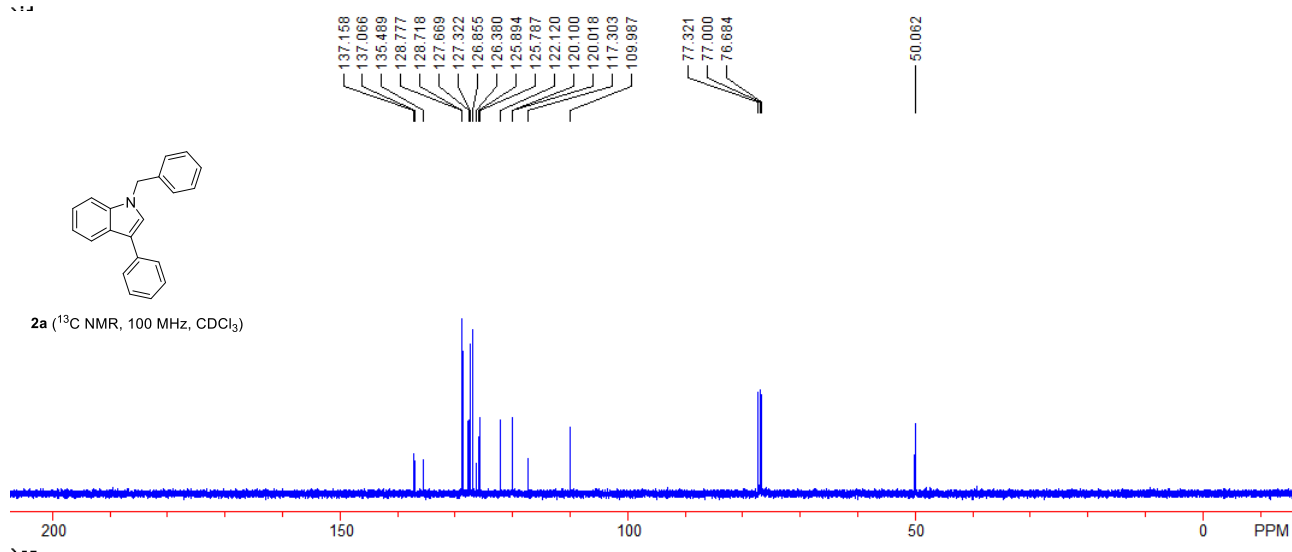

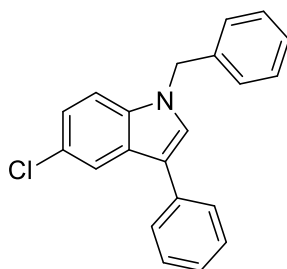

**Compound 2c:** Yield: 25.7 mg, 81%; a yellow oil; Eluent: PE/EA = 20/1.  $^1\text{H}$  NMR (400 MHz,  $\text{CDCl}_3$ , TMS)  $\delta$  5.27 (s, 2H), 7.08-7.21 (m, 4H), 7.22-7.32 (m, 5H), 7.42 (t,  $J = 7.6$  Hz, 2H), 7.59 (d,  $J = 7.6$  Hz, 2H), 7.89-7.92 (m, 1H);  $^{13}\text{C}\{^1\text{H}\}$ -NMR (101 MHz,  $\text{CDCl}_3$ , TMS)  $\delta_{\text{C}}$  50.3, 111.0, 117.1, 119.5, 122.4, 126.0, 126.1, 126.8, 127.1, 127.3, 127.4, 127.9, 128.8, 128.9, 134.8, 135.4, 136.7; IR (neat):  $\nu$  3360, 2959, 2919, 2849, 1632, 1602, 1543, 1494, 1468, 1389, 1352, 1291, 1231, 1174, 1066, 1027, 970, 819, 792, 759, 694  $\text{cm}^{-1}$ ; HRMS (EI-TOF) Calcd for  $\text{C}_{21}\text{H}_{16}\text{ClN}$   $[\text{M}]^+$ : 317.0966, found: 317.0972.

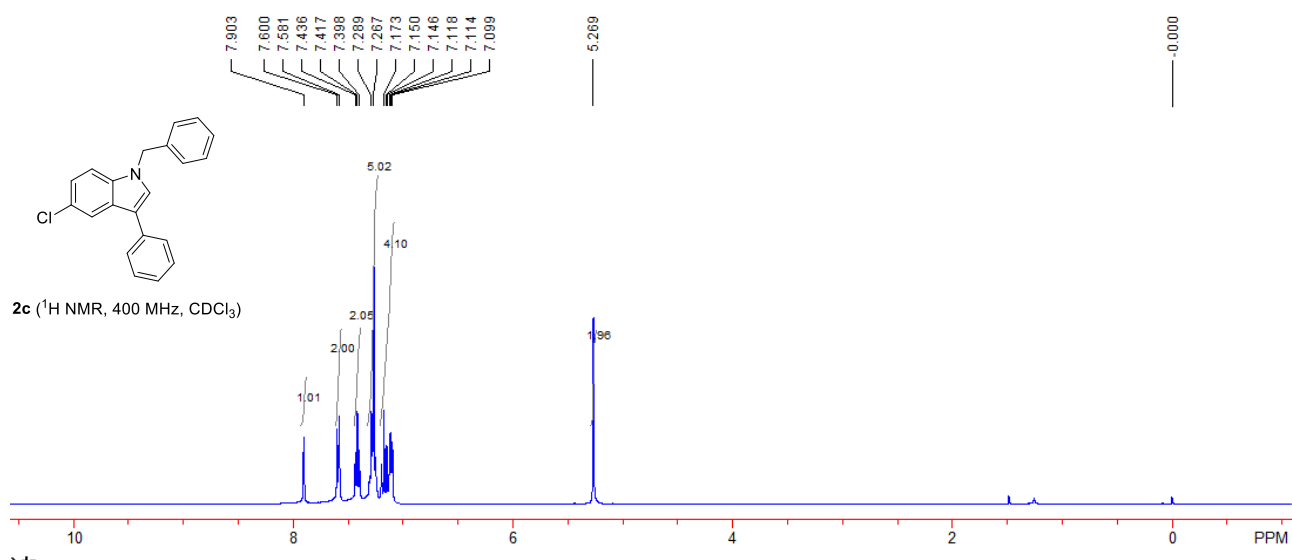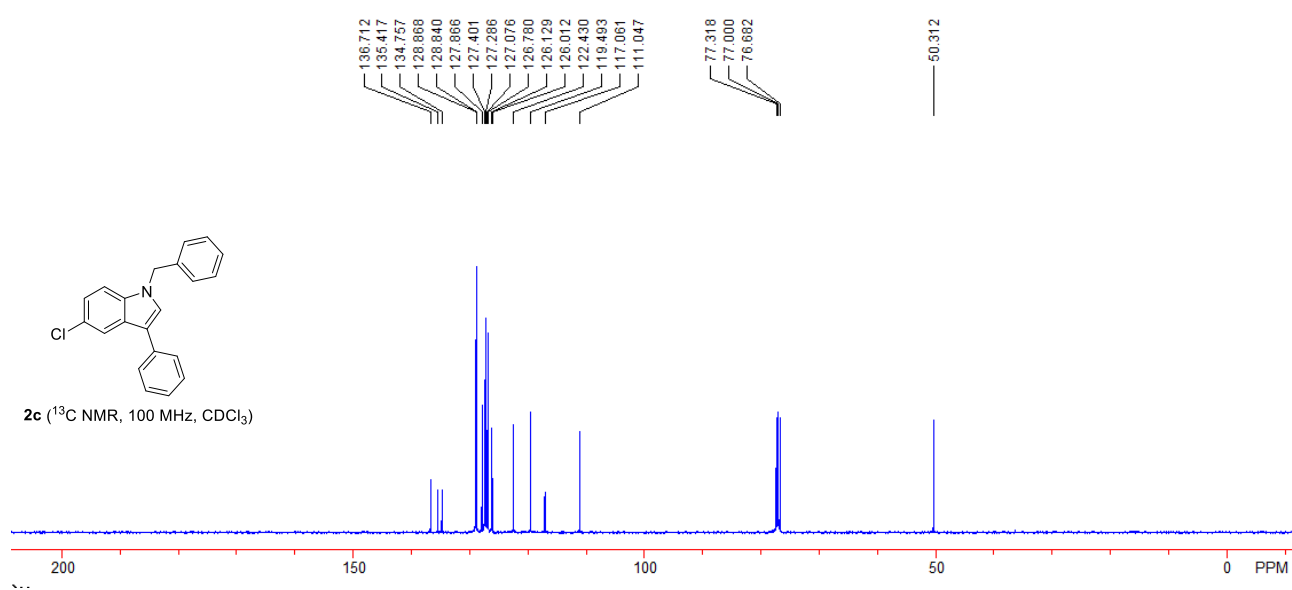

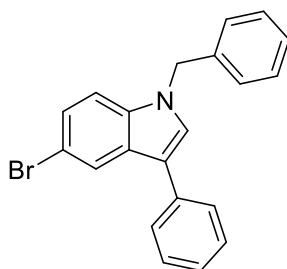

**Compound 2d:** Yield: 29.2 mg, 81%; a yellow oil; Eluent: PE/EA = 20/1.  $^1\text{H}$  NMR (400 MHz,  $\text{CDCl}_3$ , TMS)  $\delta$  5.20 (s, 2H), 7.04-7.12 (m, 3H), 7.18-7.30 (m, 6H), 7.40 (t,  $J = 7.6$  Hz, 2H), 7.57 (d,  $J = 7.6$  Hz, 2H), 8.06 (s, 1H);  $^{13}\text{C}\{^1\text{H}\}$ -NMR (101 MHz,  $\text{CDCl}_3$ , TMS)  $\delta_{\text{C}}$  50.2, 111.5, 113.6, 116.9, 122.5, 124.9, 126.1, 126.7, 126.9, 127.3, 127.8, 128.0, 128.8, 134.7, 135.6, 136.6; IR (neat):  $\nu$  3057, 3027, 2918, 2850, 1602, 1543, 1494, 1452, 1372, 1309, 1175, 1071, 1027, 969, 867, 790, 731, 694  $\text{cm}^{-1}$ ; HRMS (EI-TOF) Calcd for  $\text{C}_{21}\text{H}_{16}\text{BrN}$   $[\text{M}]^+$ : 361.0461, found: 361.0474.

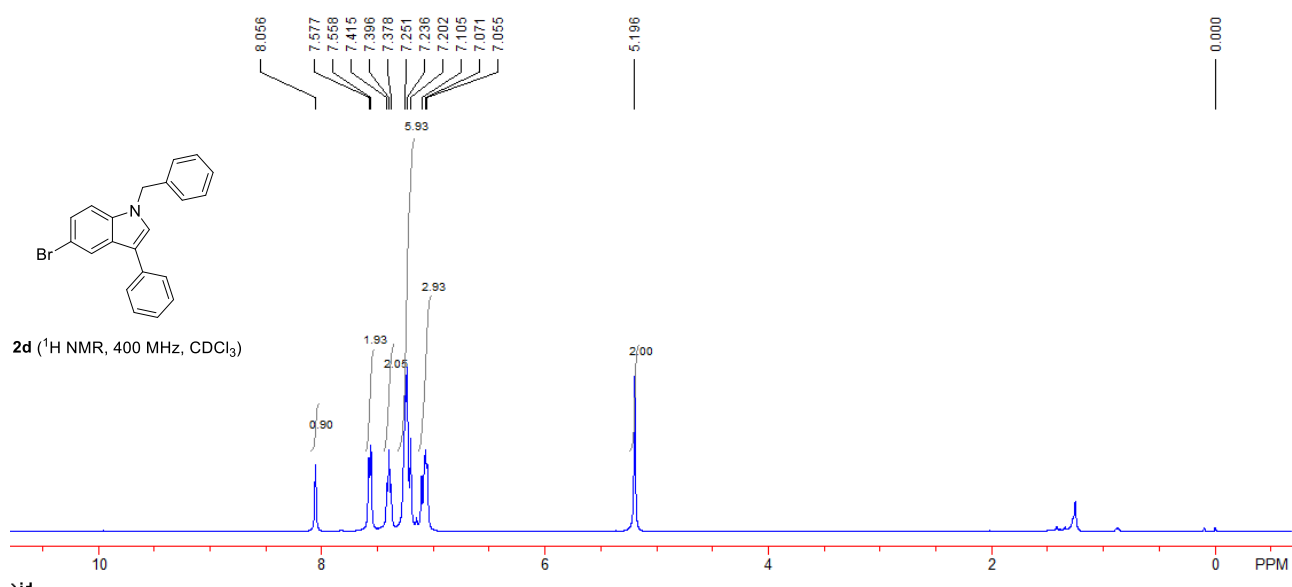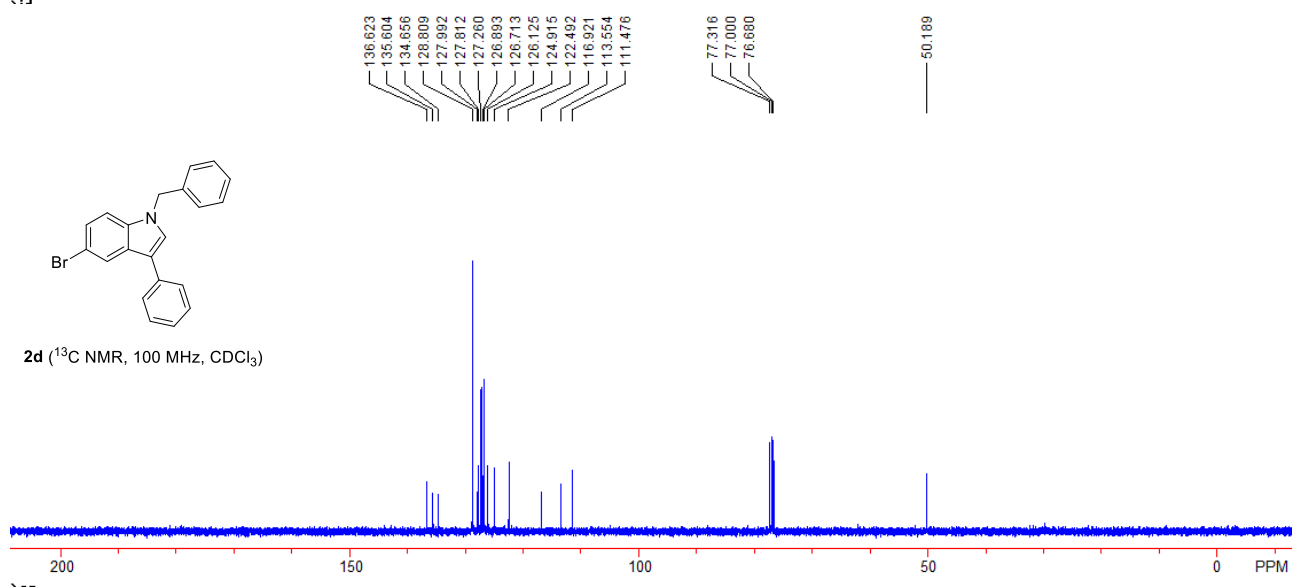

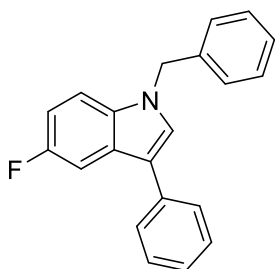

**Compound 2e:** Yield: 26.5 mg, 88%; a yellow oil; Eluent: PE/EA = 20/1.  $^1\text{H}$  NMR (400 MHz,  $\text{CDCl}_3$ , TMS)  $\delta$  5.27 (s, 2H), 6.98 (dd,  $J_1 = 8.8$  Hz,  $J_2 = 2.0$  Hz, 1H), 7.09-7.14 (m, 2H), 7.15-7.20 (m, 1H), 7.22-7.32 (m, 5H), 7.41 (t,  $J = 8.0$  Hz, 2H), 7.57-7.62 (m, 3H);  $^{13}\text{C}\{^1\text{H}\}$ -NMR (101 MHz,  $\text{CDCl}_3$ , TMS)  $\delta_{\text{C}}$  50.4, 105.0 (d,  $J = 24.1$  Hz), 110.5 (d,  $J = 26.2$  Hz), 110.7 (d,  $J = 9.6$  Hz), 117.2 (d,  $J = 4.8$  Hz), 126.0, 126.6 (d,  $J = 9.7$  Hz), 126.8, 127.1, 127.4, 127.8, 128.8 (d,  $J = 1.6$  Hz), 133.6, 135.0, 136.8, 158.4 (d,  $J = 233.7$  Hz);  $^{19}\text{F}$  NMR (376 MHz,  $\text{CDCl}_3$ )  $\delta$  -124.1; IR (neat):  $\nu$  3061, 3028, 2918, 1621, 1601, 1544, 1480, 1441, 1354, 1253, 1176, 1104, 1072, 1001, 965, 871, 778, 735, 694  $\text{cm}^{-1}$ ; HRMS (EI-TOF) Calcd for  $\text{C}_{21}\text{H}_{16}\text{FN}$   $[\text{M}]^+$ : 301.1261, found: 301.1271.

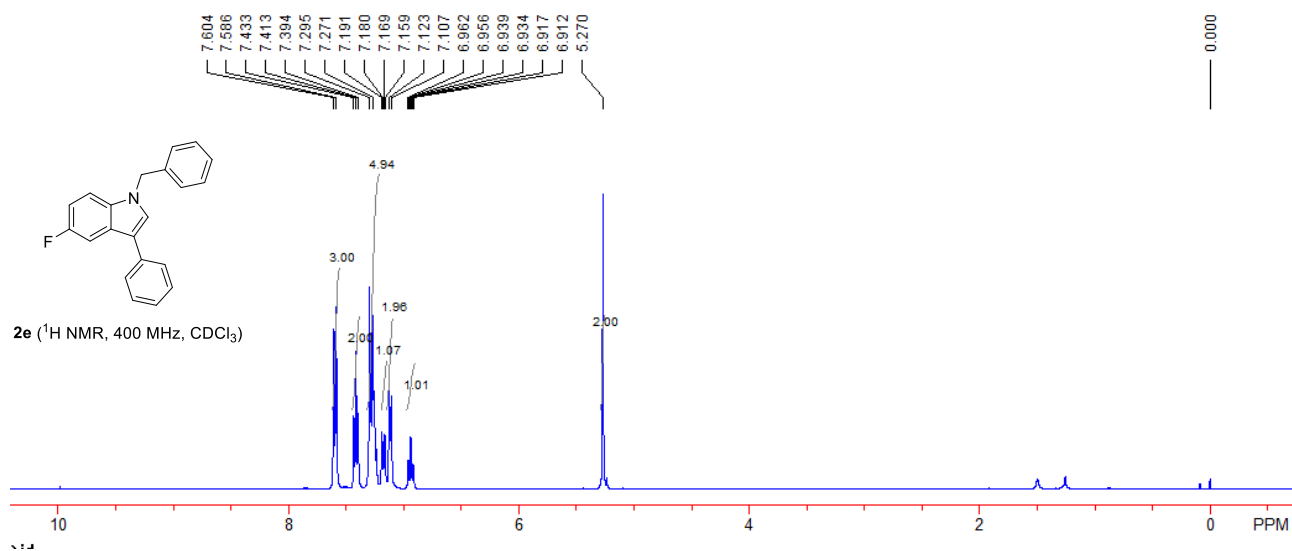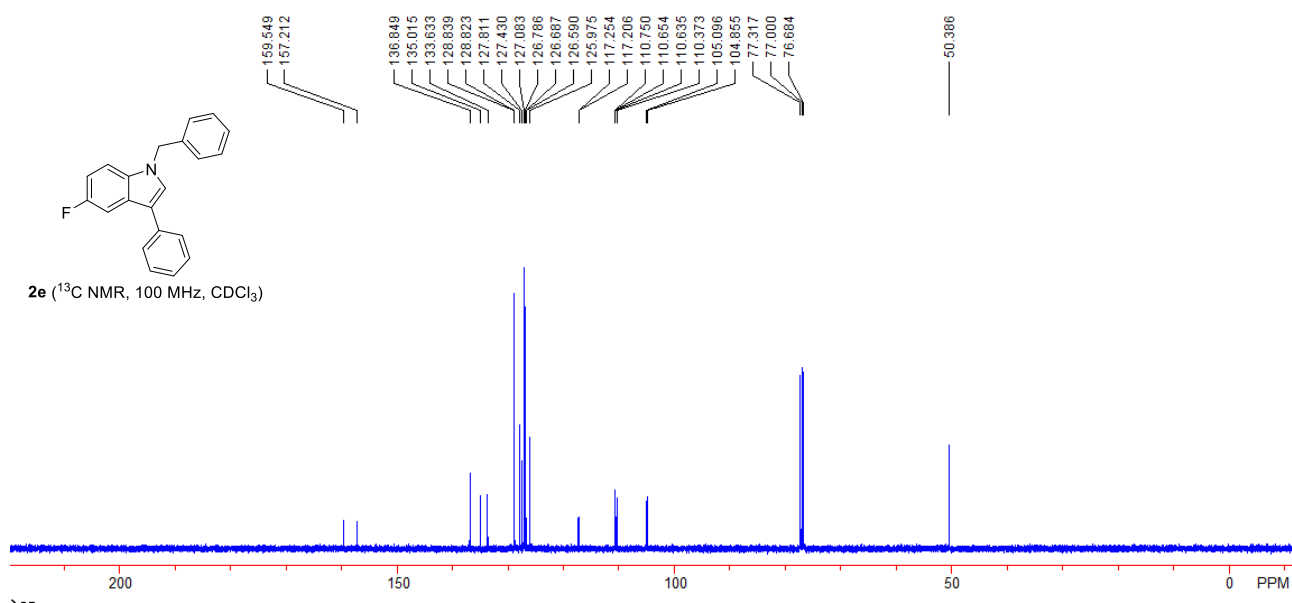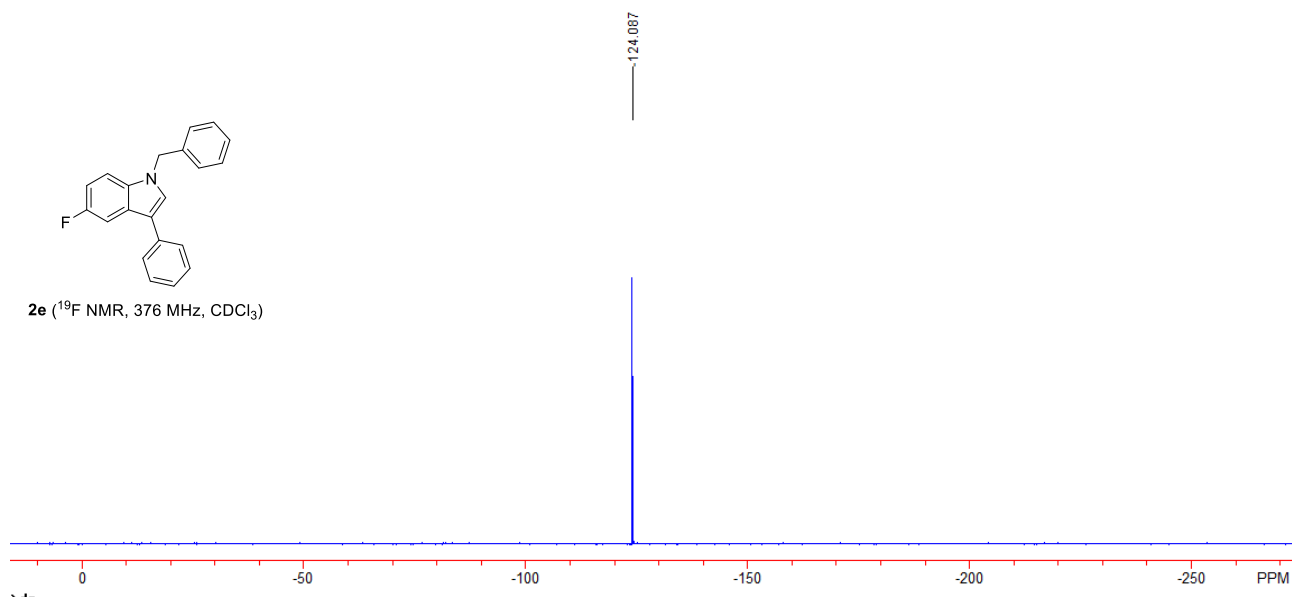

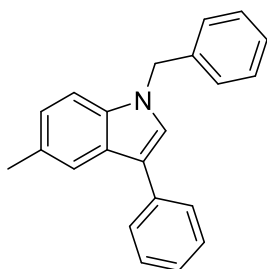

**Compound 2f:** Yield: 22.3 mg, 75%; a light yellow solid; Mp: 89-91 °C; Eluent: PE/EA = 20/1.  $^1\text{H}$  NMR (400 MHz,  $\text{CDCl}_3$ , TMS)  $\delta$  2.46 (s, 3H), 5.26 (s, 2H), 7.03 (d,  $J$  = 7.6 Hz, 1H), 7.12 (d,  $J$  = 7.2 Hz, 2H), 7.15-7.30 (m, 6H), 7.38-7.46 (m, 2H), 7.62-7.68 (m, 2H), 7.73-7.78 (m, 1H);  $^{13}\text{C}\{^1\text{H}\}$ -NMR (101 MHz,  $\text{CDCl}_3$ , TMS)  $\delta_{\text{C}}$  21.6, 50.1, 109.7, 116.7, 119.6, 123.7, 125.7, 126.0, 126.6, 126.8, 127.3, 127.6, 128.68, 128.73, 129.4, 135.4, 135.7, 137.3; IR (neat):  $\nu$  3026, 2918, 2849, 1600, 1541, 1483, 1435, 1378, 1352, 1238, 1197, 1139, 1072, 1027, 863, 791, 761, 738, 696  $\text{cm}^{-1}$ ; HRMS (EI-TOF) Calcd for  $\text{C}_{22}\text{H}_{19}\text{N}$   $[\text{M}]^+$ : 297.1512, found: 297.1519.

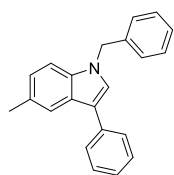

**2f** ( $^1\text{H}$  NMR, 400 MHz,  $\text{CDCl}_3$ )

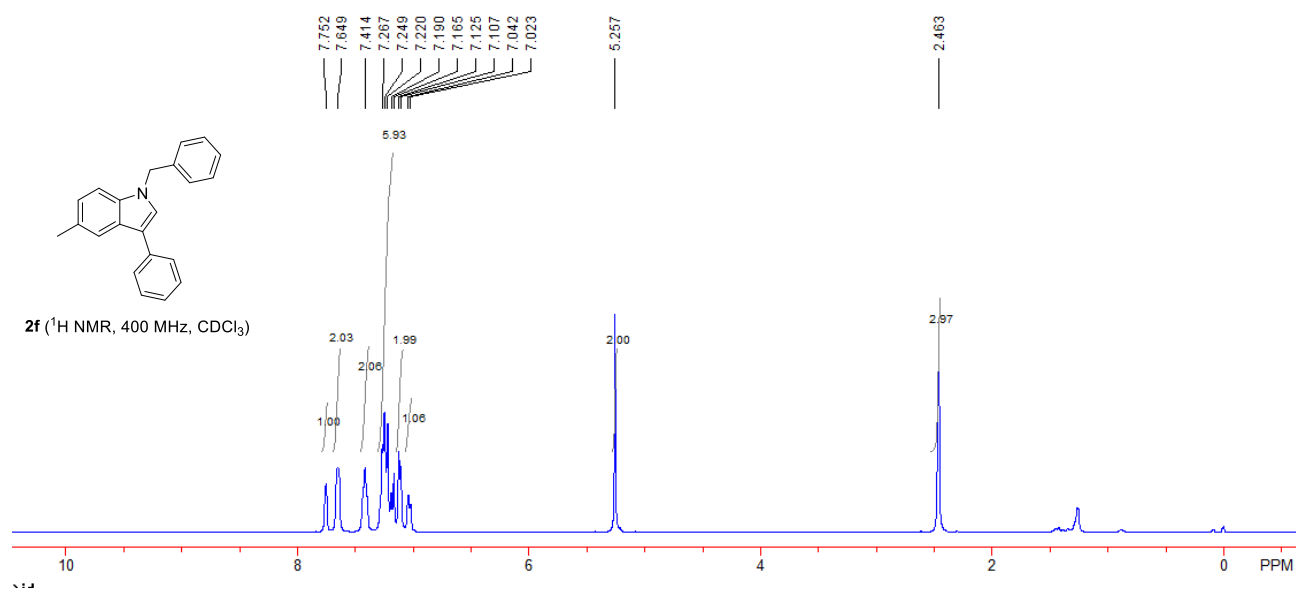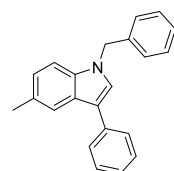

**2f** ( $^{13}\text{C}$  NMR, 100 MHz,  $\text{CDCl}_3$ )

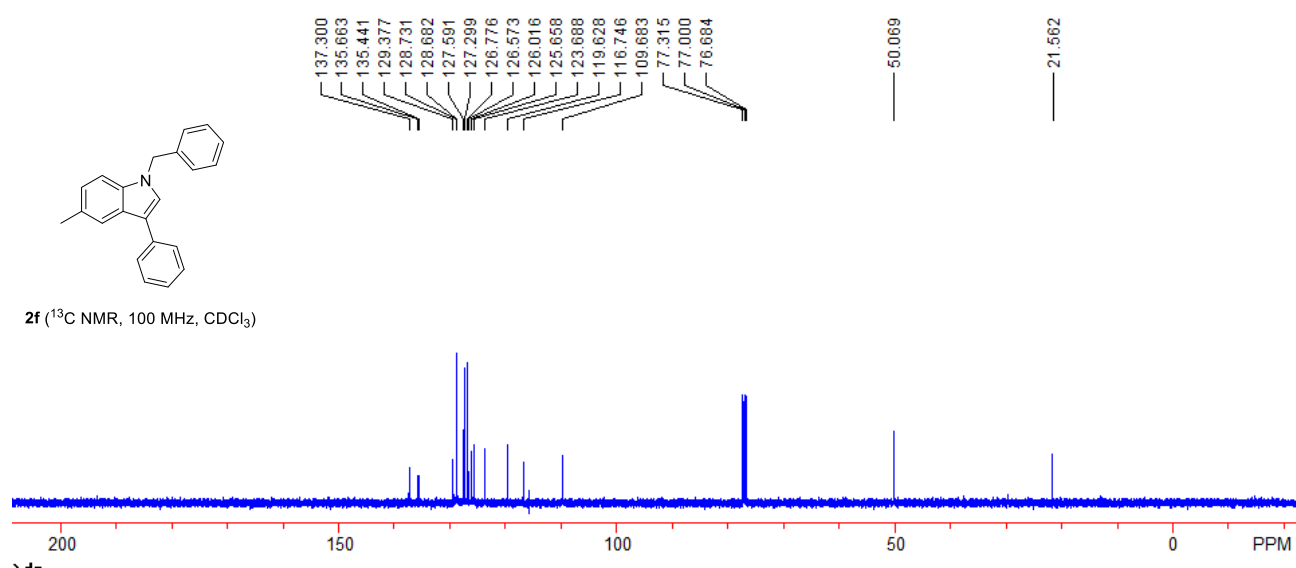

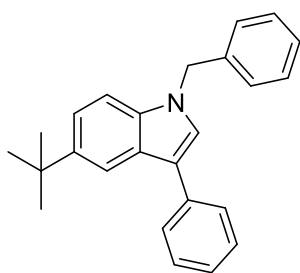

**Compound 2g:**<sup>12</sup> Yield: 26.8 mg, 79%; a light yellow solid; Mp: 72-74 °C; Eluent: PE/EA = 20/1.

<sup>1</sup>H NMR (400 MHz, CDCl<sub>3</sub>, TMS)  $\delta$  1.39 (s, 9H), 5.27 (s, 2H), 7.16 (d,  $J$  = 6.0 Hz, 2H), 7.20-7.34 (m, 7H), 7.43 (t,  $J$  = 7.2 Hz, 2H), 7.66 (d,  $J$  = 7.2 Hz, 2H), 7.95 (s, 1H); <sup>13</sup>C{<sup>1</sup>H}-NMR (101 MHz, CDCl<sub>3</sub>, TMS)  $\delta_{\text{C}}$  31.9, 34.7, 50.1, 109.5, 115.6, 117.3, 120.4, 125.7, 126.0, 126.1, 127.0, 127.4, 127.6, 128.7, 135.3, 135.8, 137.3, 143.0.

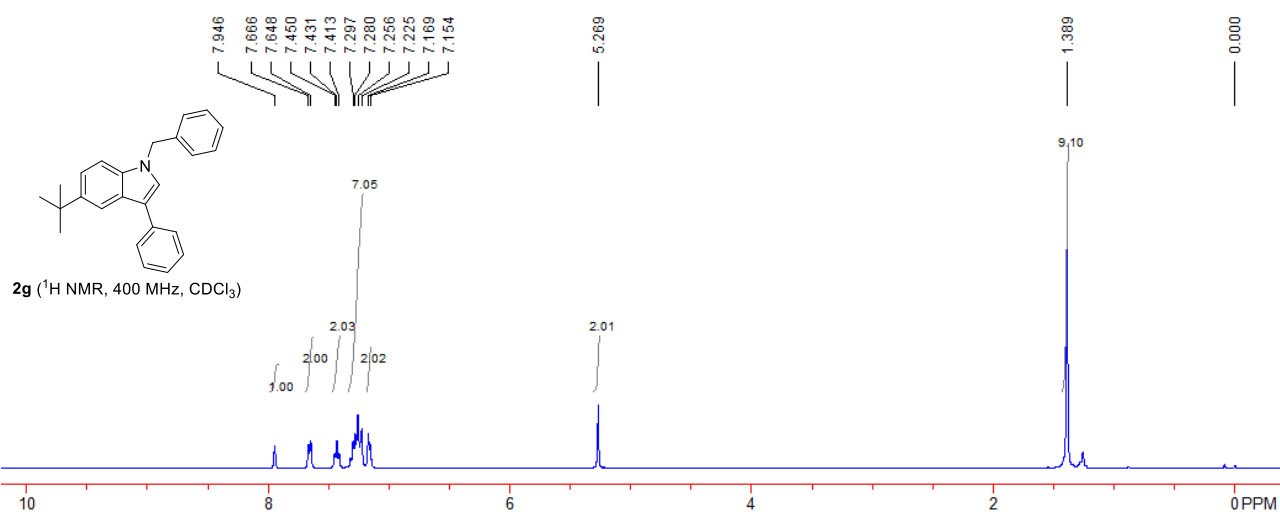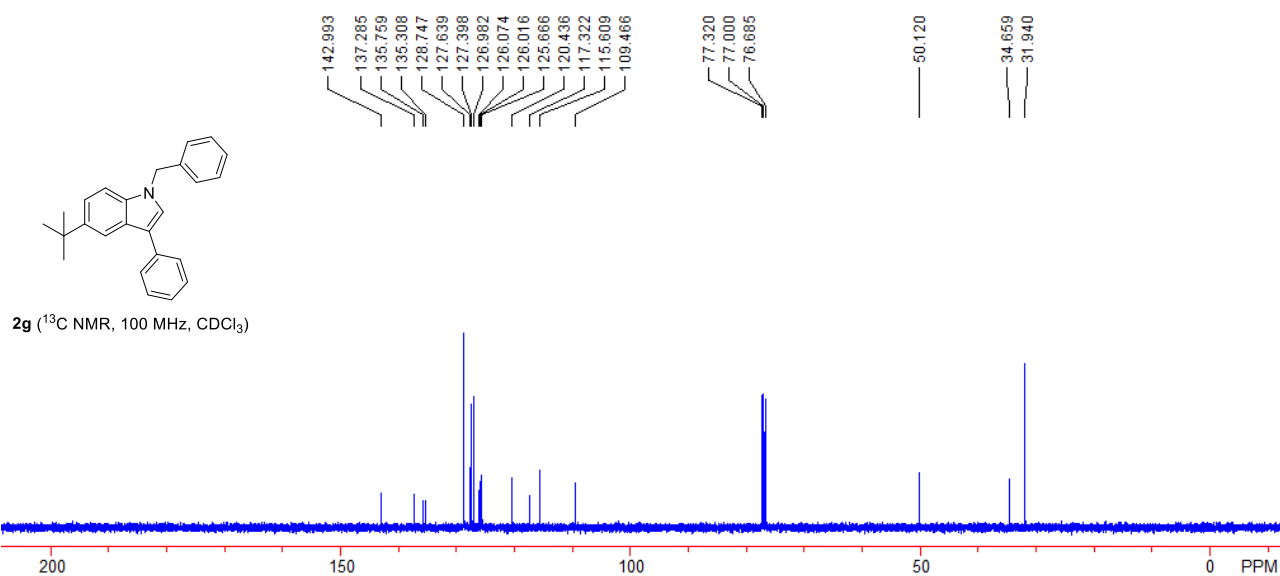

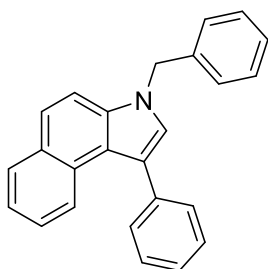

**Compound 2h:** Yield: 26.3 mg, 79%; a light yellow solid; Mp: 141-143 °C; Eluent: PE/EA = 20/1.  $^1\text{H}$  NMR (400 MHz,  $\text{CDCl}_3$ , TMS)  $\delta$  5.38 (s, 2H), 7.08 (s, 1H), 7.12 (d,  $J$  = 6.8 Hz, 2H), 7.21-7.50 (m, 9H), 7.57 (d,  $J$  = 8.4 Hz, 1H), 7.62 (d,  $J$  = 6.8 Hz, 2H), 7.85 (d,  $J$  = 6.8 Hz, 1H), 8.15 (d,  $J$  = 6.4 Hz, 1H);  $^{13}\text{C}\{^1\text{H}\}$ -NMR (101 MHz,  $\text{CDCl}_3$ , TMS)  $\delta_{\text{C}}$  50.2, 111.4, 120.2, 120.3, 123.2, 123.3, 123.5, 125.4, 125.8, 126.7, 126.8, 127.7, 128.3, 128.7, 128.8, 129.6, 130.1, 133.3, 137.1, 137.3; IR (neat):  $\nu$  3061, 3025, 2920, 2850, 1603, 1593, 1540, 1495, 1438, 1359, 1300, 1200, 1160, 1070, 971, 830, 716  $\text{cm}^{-1}$ ; HRMS (EI-TOF) Calcd for  $\text{C}_{25}\text{H}_{19}\text{N}$   $[\text{M}]^+$ : 333.1512, found: 333.1524.

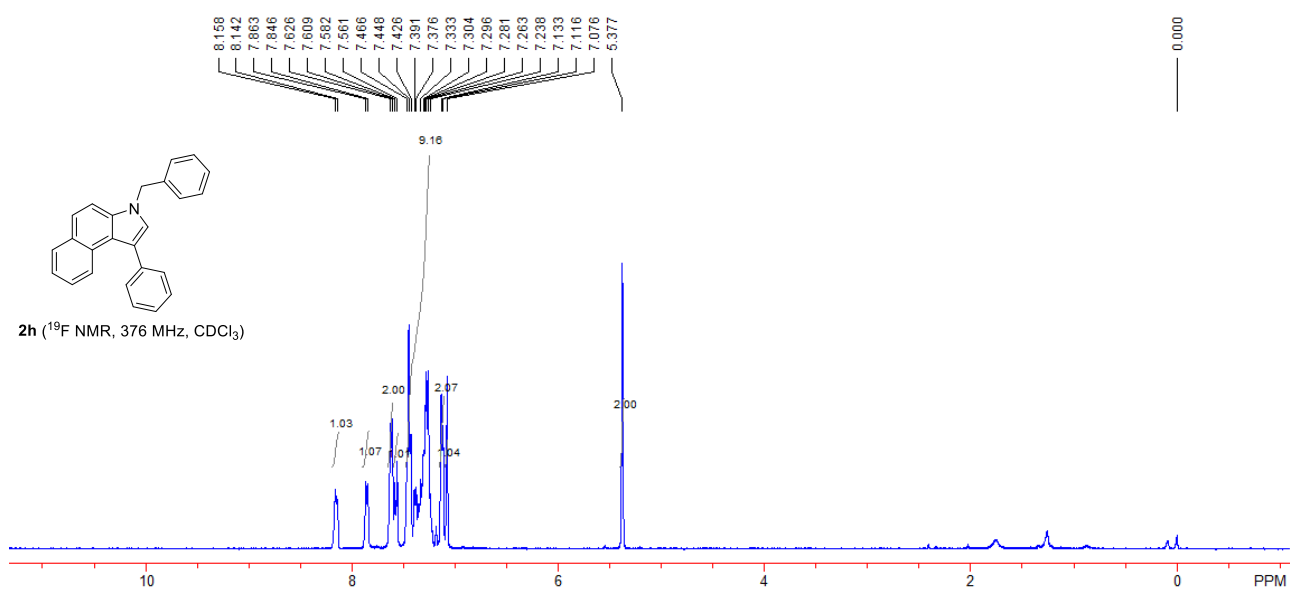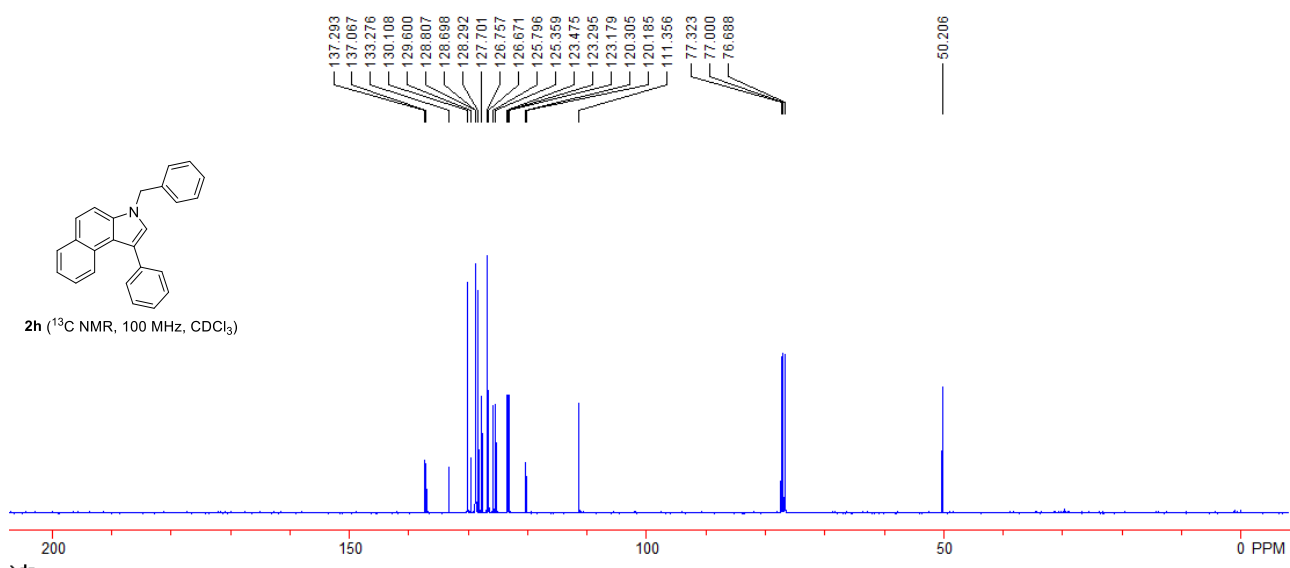

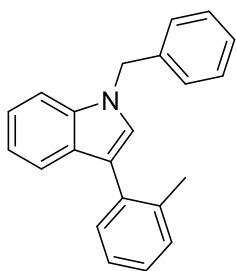

**Compound 2i:** Yield: 25.3 mg, 85%; a yellow oil; Eluent: PE/EA = 20/1.  $^1\text{H}$  NMR (400 MHz,  $\text{CDCl}_3$ , TMS)  $\delta$  2.33 (s, 3H), 5.28 (s, 2H), 7.05-7.15 (m, 4H), 7.16-7.35 (m, 8H), 7.40-7.50 (m, 1H), 7.51-7.60 (m, 1H);  $^{13}\text{C}\{^1\text{H}\}$ -NMR (101 MHz,  $\text{CDCl}_3$ , TMS)  $\delta_{\text{C}}$  20.8, 50.0, 109.8, 116.5, 119.6, 120.3, 121.8, 125.6, 126.6, 126.7, 126.9, 127.6, 127.8, 128.7, 130.3, 130.8, 134.3, 136.3, 136.6, 137.4; IR (neat):  $\nu$  3027, 2919, 1602, 1548, 1463, 1452, 1329, 1174, 937, 769, 724, 695  $\text{cm}^{-1}$ ; HRMS (ESI-TOF) Calcd for  $\text{C}_{22}\text{H}_{20}\text{N}$   $[\text{M}+\text{H}]^+$ : 298.1590, found: 298.1595.

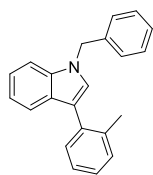

2i (<sup>1</sup>H NMR, 400 MHz, CDCl<sub>3</sub>)

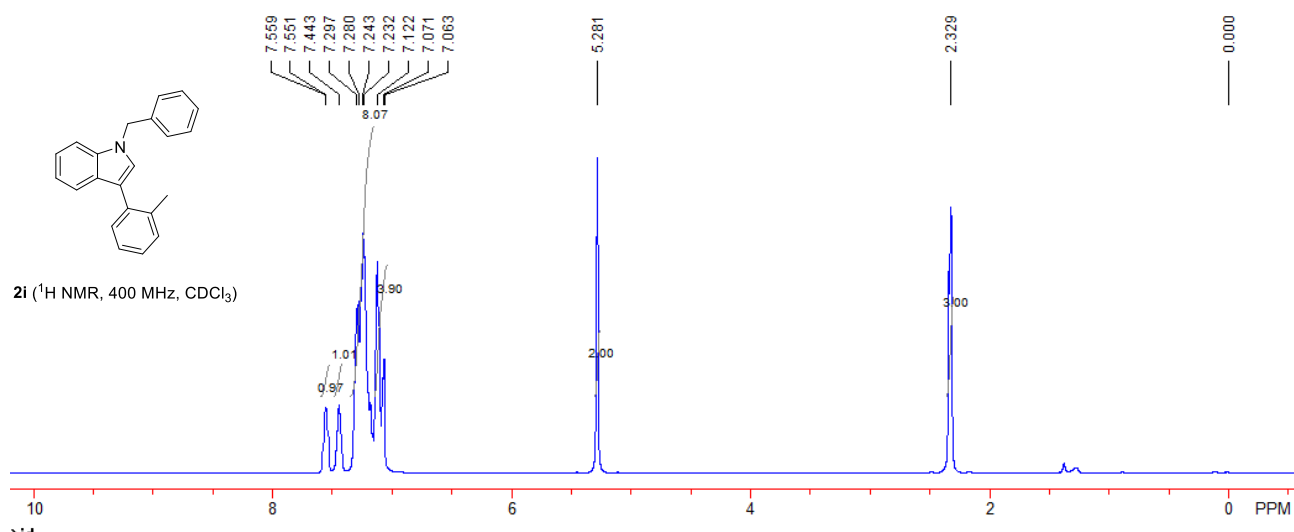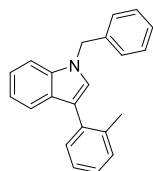

2i (<sup>13</sup>C NMR, 100 MHz, CDCl<sub>3</sub>)

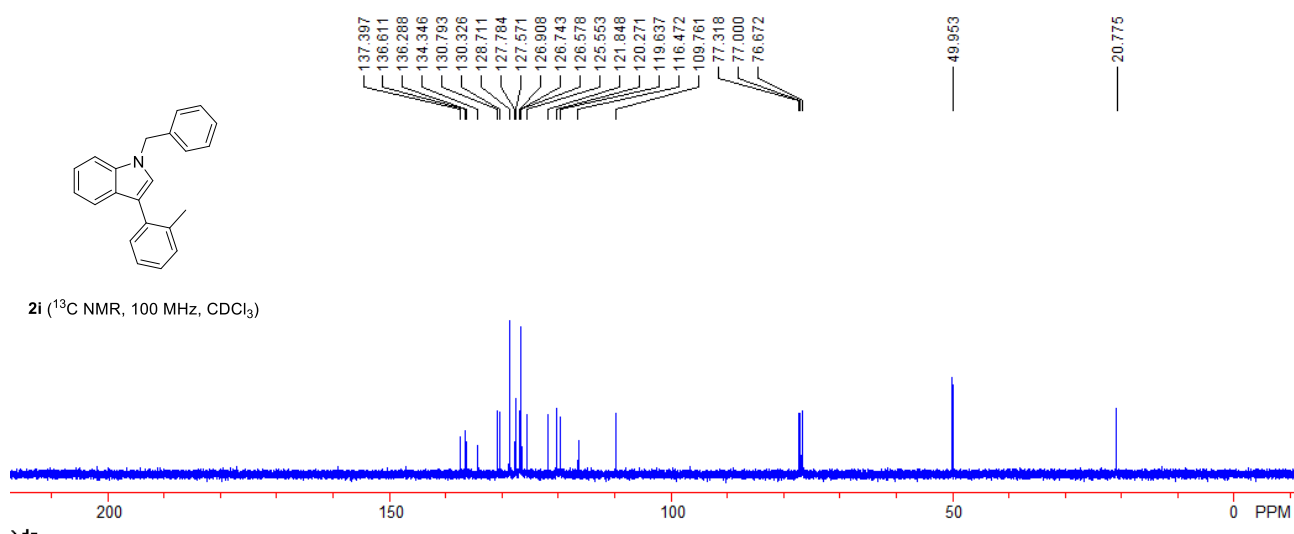

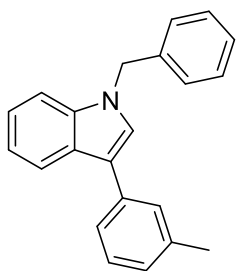

**Compound 2j:** Yield: 24.7 mg, 83%; a light yellow solid; Mp: 86-88 °C; Eluent: PE/EA = 20/1.  $^1\text{H}$  NMR (400 MHz,  $\text{CDCl}_3$ , TMS)  $\delta$  2.37 (s, 3H), 5.17 (s, 2H), 7.02-7.08 (m, 3H), 7.13-7.24 (m, 7H), 7.28 (t,  $J = 7.6$  Hz, 1H), 7.43-7.48 (m, 2H), 7.94-7.99 (m, 1H);  $^{13}\text{C}\{^1\text{H}\}$ -NMR (101 MHz,  $\text{CDCl}_3$ , TMS)  $\delta_{\text{C}}$  21.5, 49.9, 109.9, 117.3, 120.0, 120.1, 122.0, 124.4, 125.9, 126.4, 126.6, 126.8, 127.6, 128.0, 128.6, 128.7, 135.4, 137.0, 137.2, 138.2; IR (neat):  $\nu$  3023, 2916, 1602, 1538, 1494, 1391, 1189, 1072, 959, 830, 779, 729, 694  $\text{cm}^{-1}$ ; HRMS (EI-TOF) Calcd for  $\text{C}_{22}\text{H}_{19}\text{N}$   $[\text{M}]^+$ : 297.1512, found: 297.1524.

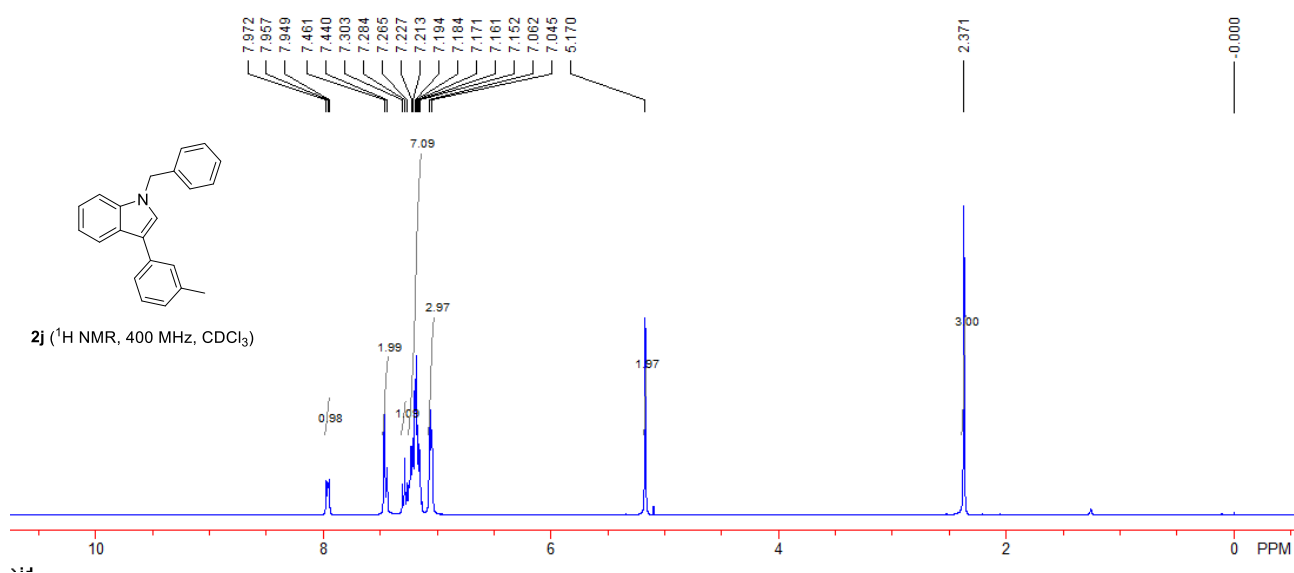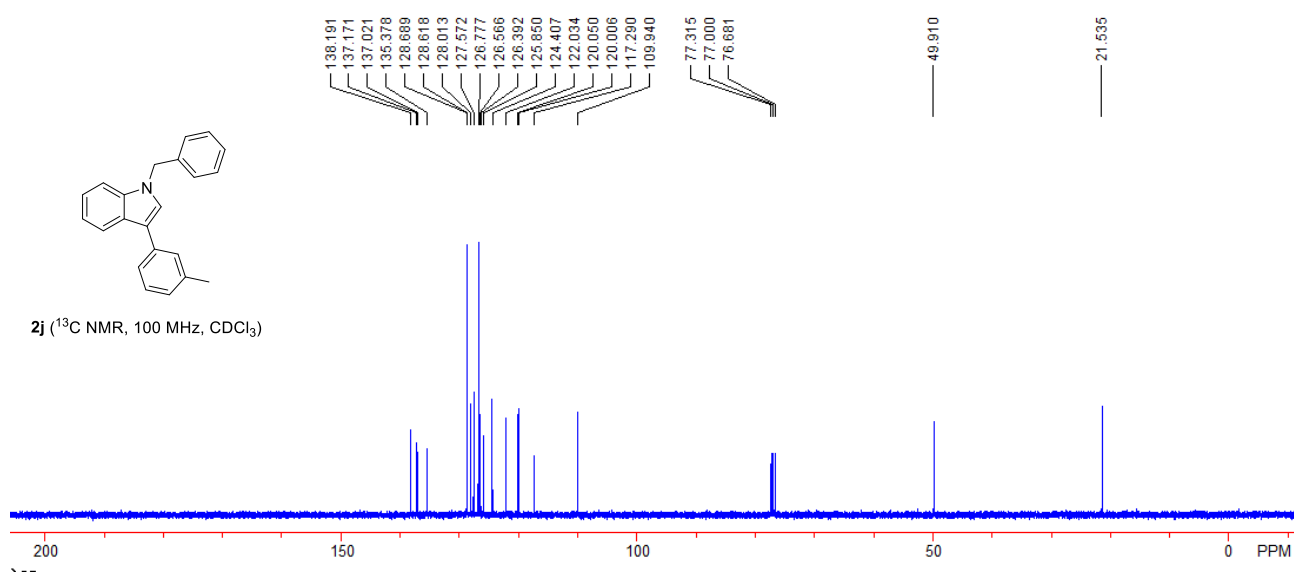

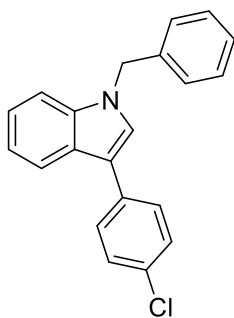

**Compound 2k:** Yield: 26.0 mg, 82%; a light yellow solid; Mp: 92-94 °C; Eluent: PE/EA = 20/1.  $^1\text{H}$  NMR (400 MHz,  $\text{CDCl}_3$ , TMS)  $\delta$  5.19 (s, 2H), 7.07 (d,  $J = 6.4$  Hz, 2H), 7.12-7.19 (m, 3H), 7.20-7.28 (m, 4H), 7.33 (d,  $J = 8.4$  Hz, 2H), 7.52 (d,  $J = 8.4$  Hz, 2H), 7.87 (d,  $J = 8.0$  Hz, 1H);  $^{13}\text{C}\{^1\text{H}\}$ -NMR (101 MHz,  $\text{CDCl}_3$ , TMS)  $\delta_{\text{C}}$  50.0, 110.1, 116.0, 119.7, 120.3, 122.3, 125.9, 126.1, 126.8, 127.7, 128.4, 128.7, 128.8, 131.3, 134.0, 136.95, 137.02; IR (neat):  $\nu$  3027, 2922, 2852, 1593, 1556, 1491, 1467, 1410, 1355, 1296, 1202, 1139, 1020, 969, 827, 763, 716  $\text{cm}^{-1}$ ; HRMS (EI-TOF) Calcd for  $\text{C}_{21}\text{H}_{16}\text{ClN}$   $[\text{M}]^+$ : 317.0966, found: 317.0976.

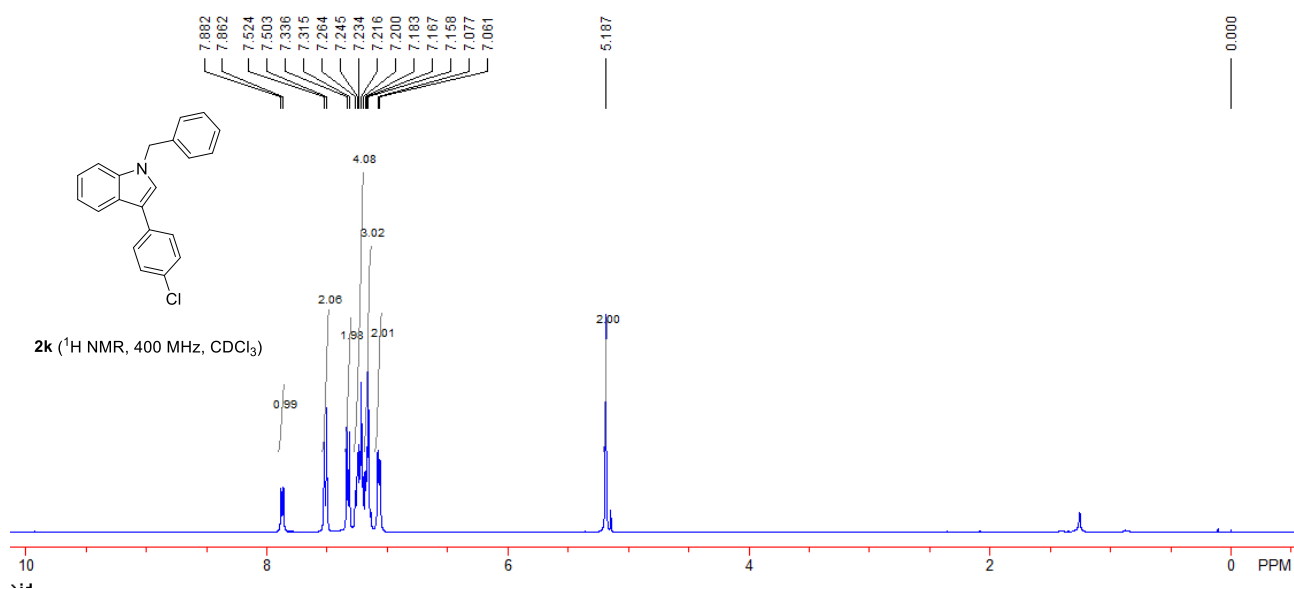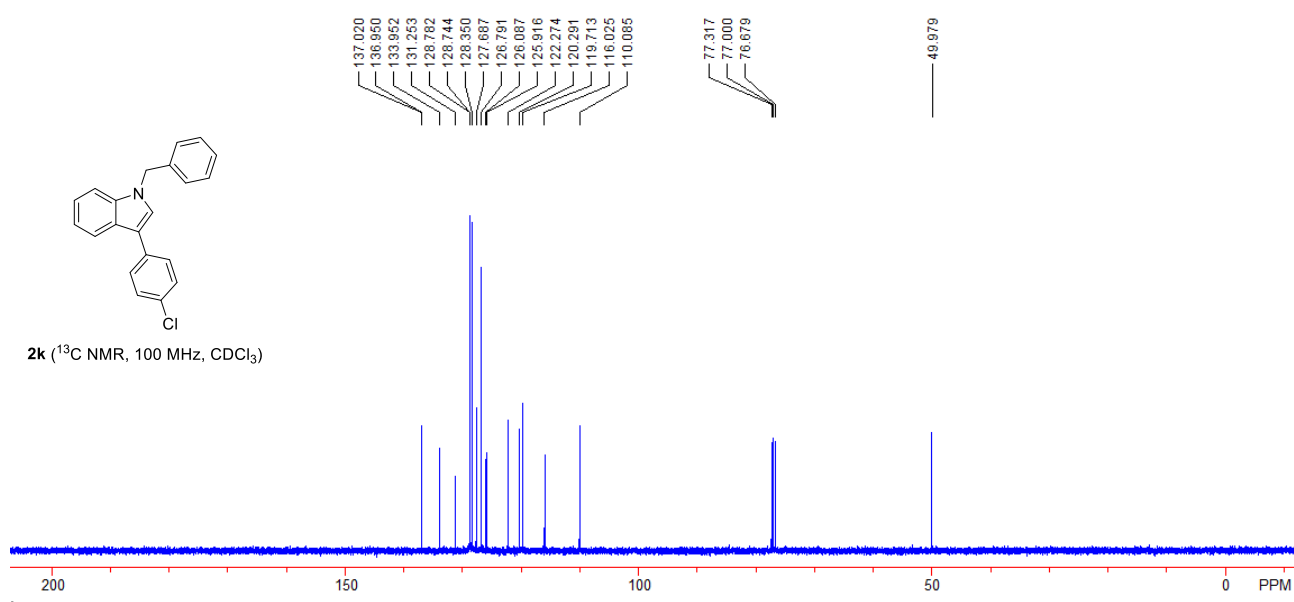

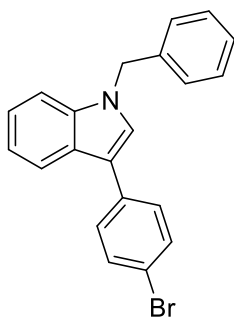

**Compound 2l:** Yield: 30.0 mg, 83%; a light yellow solid; Mp: 103-105 °C; Eluent: PE/EA = 20/1.  $^1\text{H}$  NMR (400 MHz,  $\text{CDCl}_3$ , TMS)  $\delta$  5.28 (s, 2H), 7.13 (t,  $J$  = 6.8 Hz, 2H), 7.15-7.33 (m, 7H), 7.47-7.54 (m, 4H), 7.89 (d,  $J$  = 7.6 Hz, 1H);  $^{13}\text{C}\{^1\text{H}\}$ -NMR (101 MHz,  $\text{CDCl}_3$ , TMS)  $\delta_{\text{C}}$  50.1, 110.1, 116.1, 119.3, 119.7, 120.3, 122.3, 125.9, 126.1, 126.8, 127.7, 128.7, 128.8, 131.7, 134.4, 136.9, 137.1; IR (neat):  $\nu$  2988, 2965, 2908, 2885, 1587, 1494, 1441, 1378, 1332, 1264, 1199, 1140, 1099, 1029, 950, 832, 785, 727, 698  $\text{cm}^{-1}$ ; HRMS (EI-TOF) Calcd for  $\text{C}_{21}\text{H}_{16}\text{BrN}$   $[\text{M}]^+$ : 361.0461, found: 361.0472.

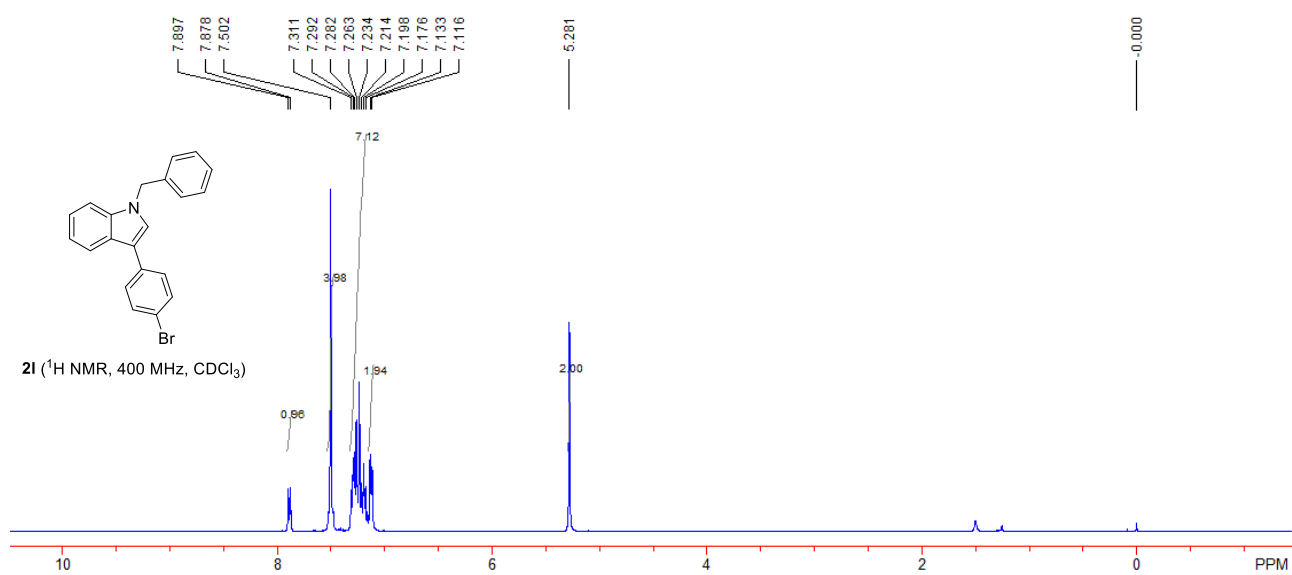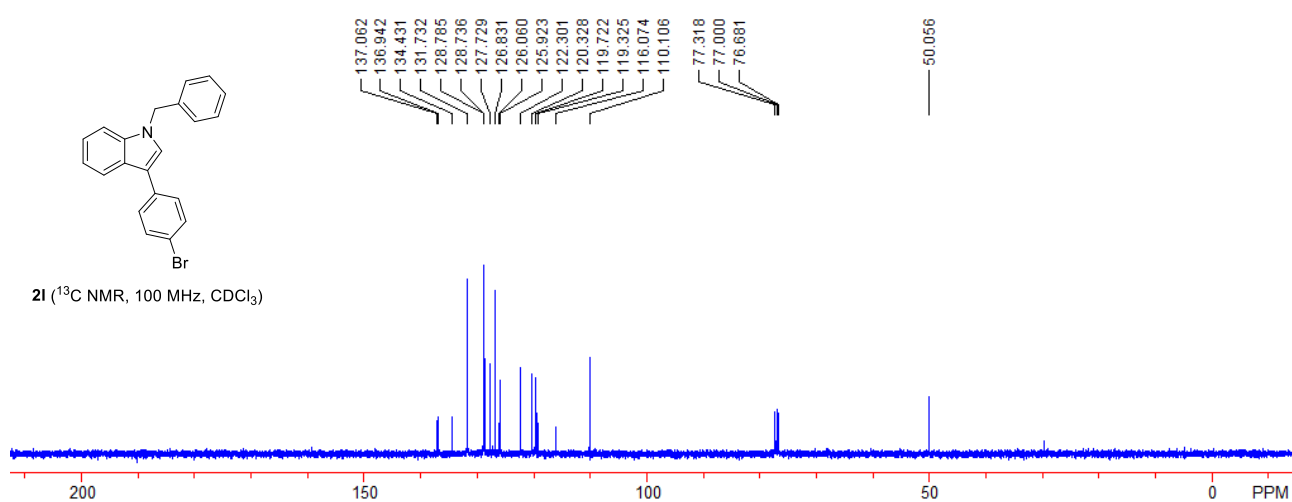

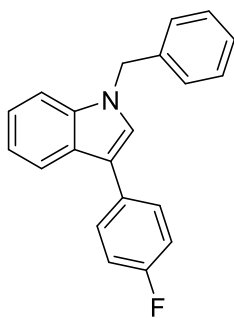

**Compound 2m:** Yield: 22.9 mg, 76%; a light yellow solid; Mp: 106-108 °C; Eluent: PE/EA = 20/1.  $^1\text{H}$  NMR (400 MHz,  $\text{CDCl}_3$ , TMS)  $\delta$  5.20 (s, 2H), 7.02-7.11 (m, 4H), 7.12-7.29 (m, 7H), 7.50-7.58 (m, 2H), 7.87 (d,  $J = 6.4$  Hz, 1H);  $^{13}\text{C}\{^1\text{H}\}$ -NMR (101 MHz,  $\text{CDCl}_3$ , TMS)  $\delta_{\text{C}}$  50.0, 110.0, 115.5 (d,  $J = 21.5$  Hz), 116.3, 119.7, 120.2, 122.2, 125.7, 126.3, 126.8, 127.7, 128.7 (d,  $J = 8.9$  Hz), 128.8, 131.5 (d,  $J = 2.9$  Hz), 137.0, 137.1, 161.3 (d,  $J = 242.8$  Hz);  $^{19}\text{F}$  NMR (376 MHz,  $\text{CDCl}_3$ )  $\delta$  -116.9; IR (neat):  $\nu$  2924, 1543, 1503, 1468, 1436, 1356, 1333, 1226, 1187, 1156, 1097, 1070, 968, 835, 809, 728, 695  $\text{cm}^{-1}$ ; HRMS (EI-TOF) Calcd for  $\text{C}_{21}\text{H}_{16}\text{FN}$   $[\text{M}]^+$ : 301.1261, found: 301.1270.

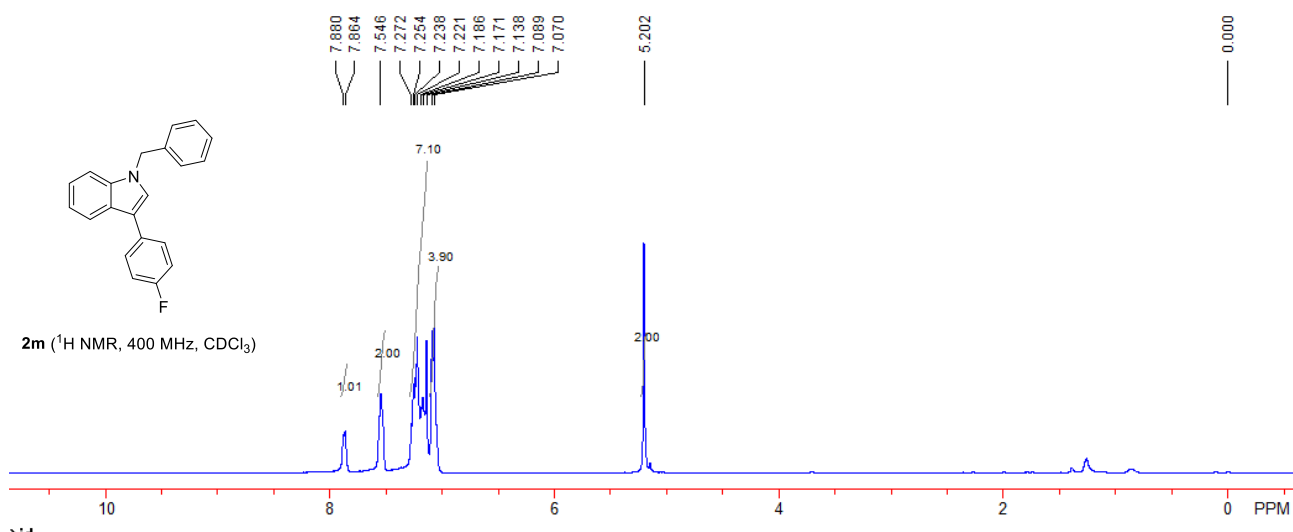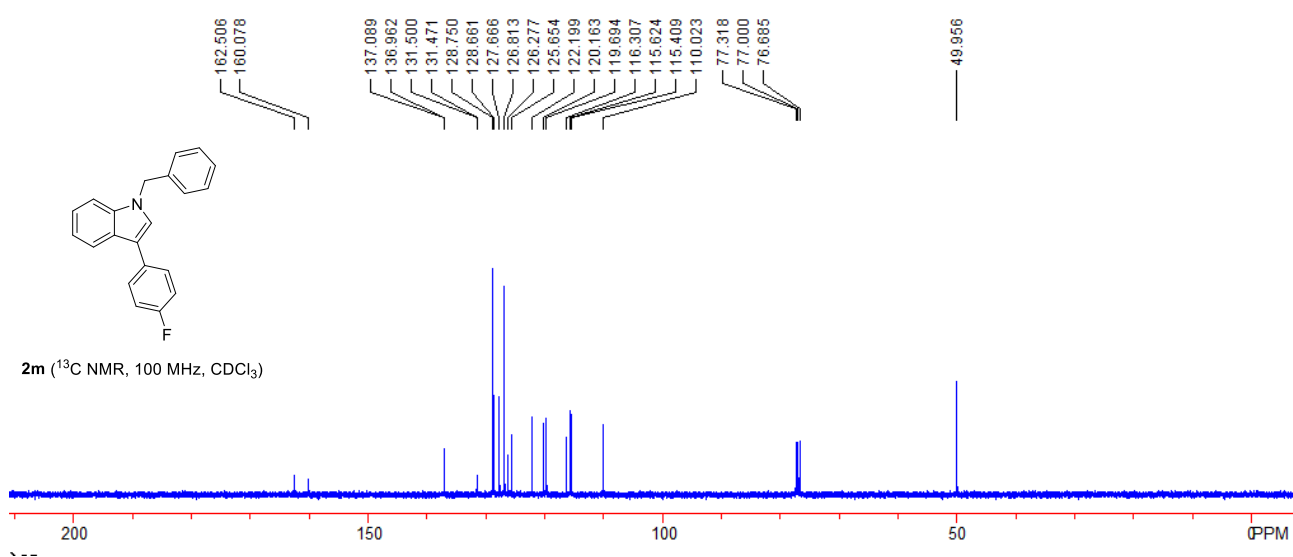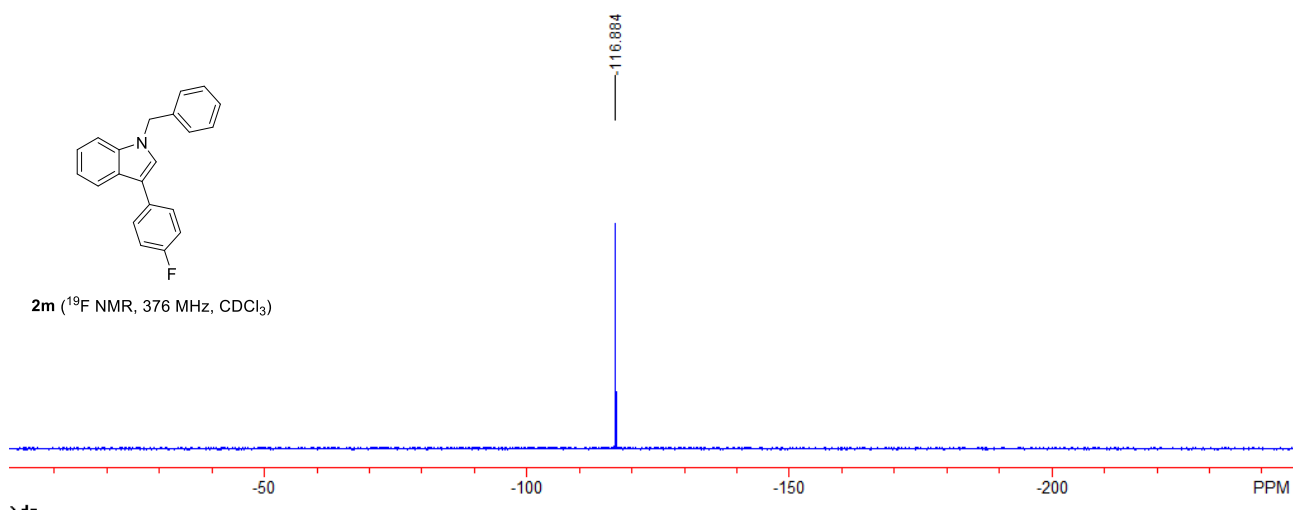

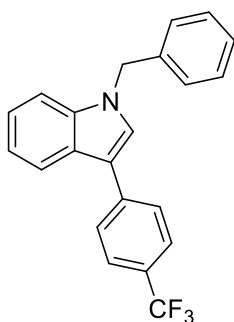

**Compound 2n:** Yield: 27.4 mg, 78%; a light yellow solid; Mp: 92-94 °C; Eluent: PE/EA = 20/1.  $^1\text{H}$  NMR (400 MHz,  $\text{CDCl}_3$ , TMS)  $\delta$  5.32 (s, 2H), 7.15 (d,  $J$  = 6.8 Hz, 2H), 7.19-7.37 (m, 7H), 7.65 (d,  $J$  = 8.0 Hz, 2H), 7.74 (d,  $J$  = 8.0 Hz, 2H), 7.94 (d,  $J$  = 7.6 Hz, 1H);  $^{13}\text{C}\{^1\text{H}\}$ -NMR (101 MHz,  $\text{CDCl}_3$ , TMS)  $\delta_{\text{C}}$  50.2, 110.3, 116.0, 119.8, 120.6, 122.5, 124.5 (q,  $J$  = 270.3 Hz), 125.7 (q,  $J$  = 4.0 Hz), 126.1, 126.6, 126.9, 127.1, 127.5 (q,  $J$  = 32.2 Hz), 127.9, 128.9, 136.8, 137.2, 139.3;  $^{19}\text{F}$  NMR (376 MHz,  $\text{CDCl}_3$ )  $\delta$  -62.1; IR (neat):  $\nu$  3028, 2920, 2850, 1614, 1544, 1509, 1495, 1454, 1388, 1324, 1237, 1158, 1104, 1027, 966, 838, 785, 728, 696  $\text{cm}^{-1}$ ; HRMS (EI-TOF) Calcd for  $\text{C}_{22}\text{H}_{16}\text{F}_3\text{N}$   $[\text{M}]^+$ : 351.1229, found: 351.1243.

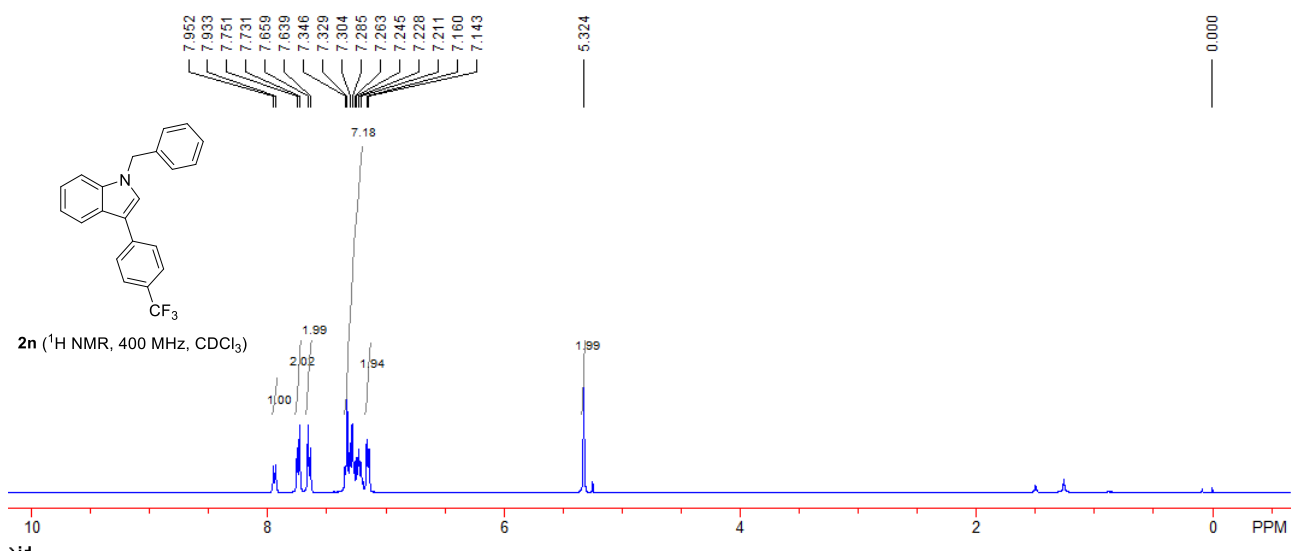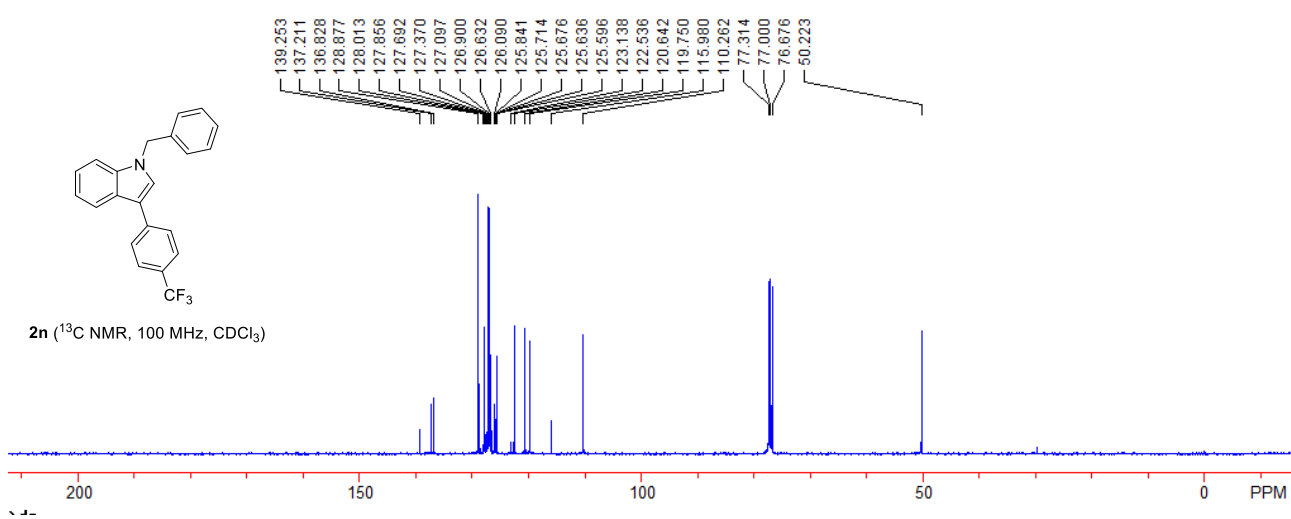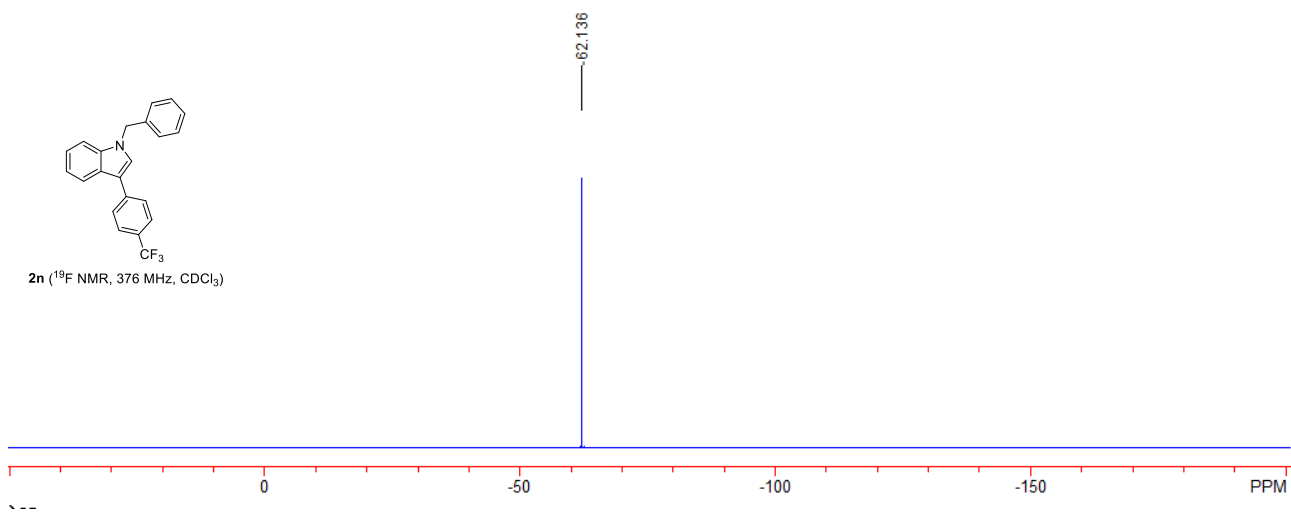

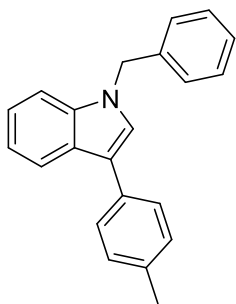

**Compound 2o:**<sup>13</sup> Yield: 23.8 mg, 80%; a light yellow solid; Mp: 75-77 °C; Eluent: PE/EA = 20/1. <sup>1</sup>H NMR (400 MHz, CDCl<sub>3</sub>, TMS) δ 2.37 (s, 3H), 5.25 (s, 2H), 7.11 (d, *J* = 6.8 Hz, 2H), 7.15-7.30 (m, 9H), 7.55 (d, *J* = 7.6 Hz, 2H), 7.94 (d, *J* = 8.4 Hz, 1H); <sup>13</sup>C{<sup>1</sup>H}-NMR (101 MHz, CDCl<sub>3</sub>, TMS) δ<sub>C</sub> 21.1, 50.0, 109.9, 117.2, 119.95, 120.03, 122.0, 125.6, 126.4, 126.8, 127.2, 127.6, 128.7, 129.4, 132.5, 135.4, 137.0, 137.2.

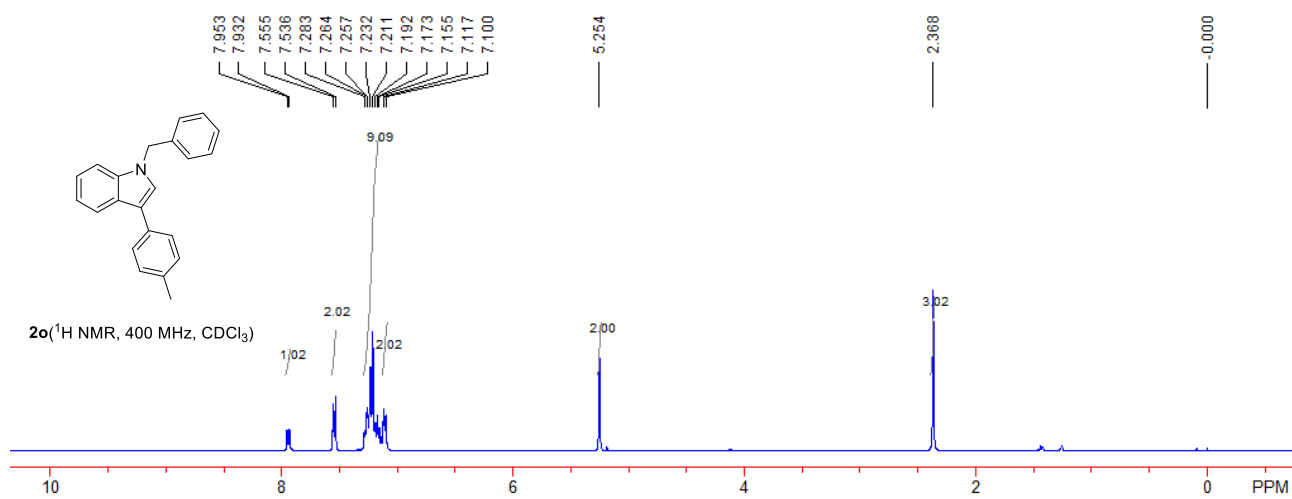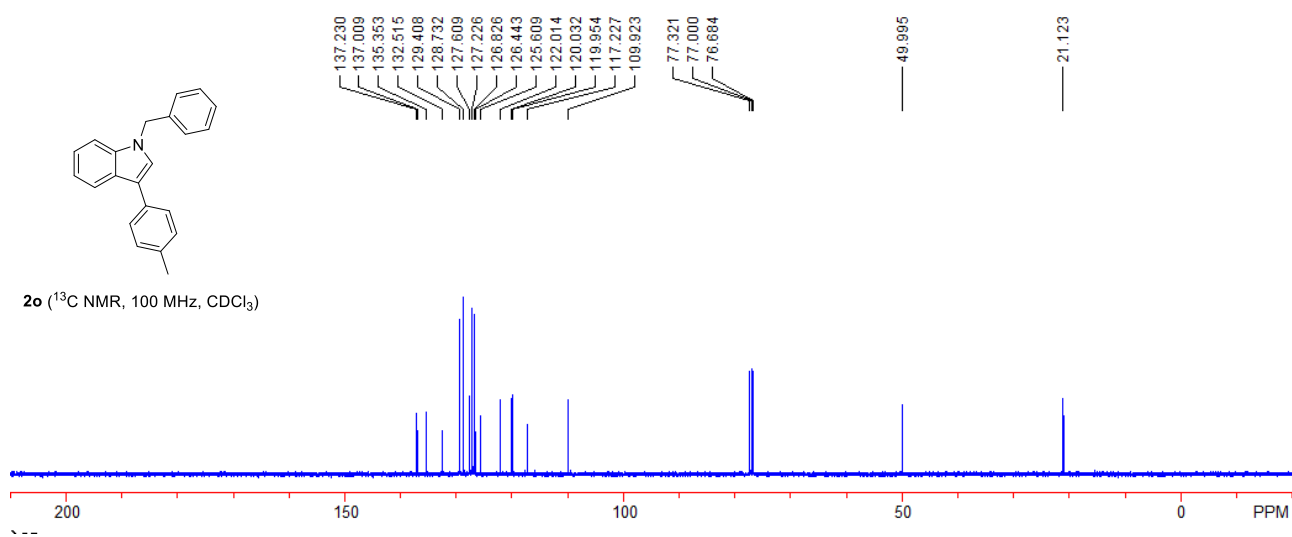

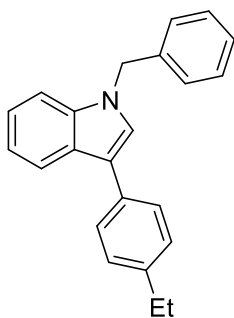

**Compound 2p:** Yield: 25.8 mg, 83%; a light yellow solid; Mp: 74-76 °C; Eluent: PE/EA = 20/1.  $^1\text{H}$  NMR (400 MHz,  $\text{CDCl}_3$ , TMS)  $\delta$  1.28 (t,  $J = 7.6$  Hz, 3H), 2.69 (q,  $J = 7.6$  Hz, 2H), 5.32 (s, 2H), 7.12-7.24 (m, 6H), 7.26-7.34 (m, 5H), 7.59 (d,  $J = 7.6$  Hz, 2H), 7.96 (d,  $J = 6.8$  Hz, 1H);  $^{13}\text{C}\{^1\text{H}\}$ -NMR (101 MHz,  $\text{CDCl}_3$ , TMS)  $\delta_{\text{C}}$  15.7, 28.6, 50.0, 109.9, 117.3, 119.9, 120.1, 122.0, 125.7, 126.4, 126.8, 127.3, 127.6, 128.2, 128.8, 132.8, 137.0, 137.2, 141.8; IR (neat):  $\nu$  3026, 2959, 2923, 1612, 1543, 1467, 1436, 1384, 1332, 1299, 1181, 1070, 1070, 1018, 938, 831, 808, 726, 694  $\text{cm}^{-1}$ ; HRMS (EI-TOF) Calcd for  $\text{C}_{23}\text{H}_{21}\text{N}$   $[\text{M}]^+$ : 311.1669, found: 311.1676.

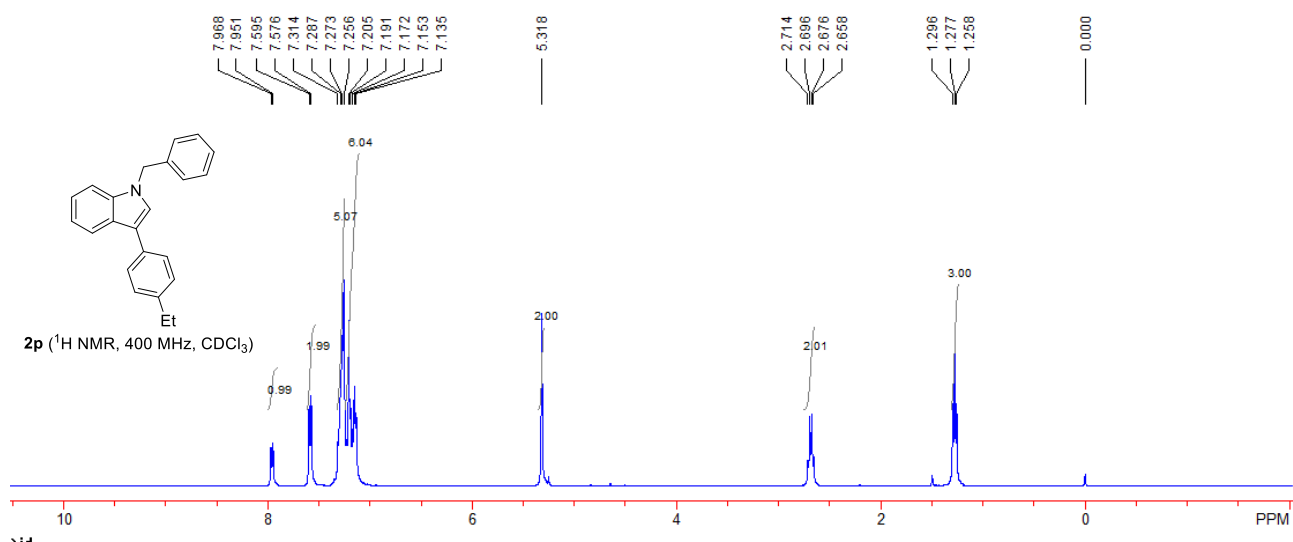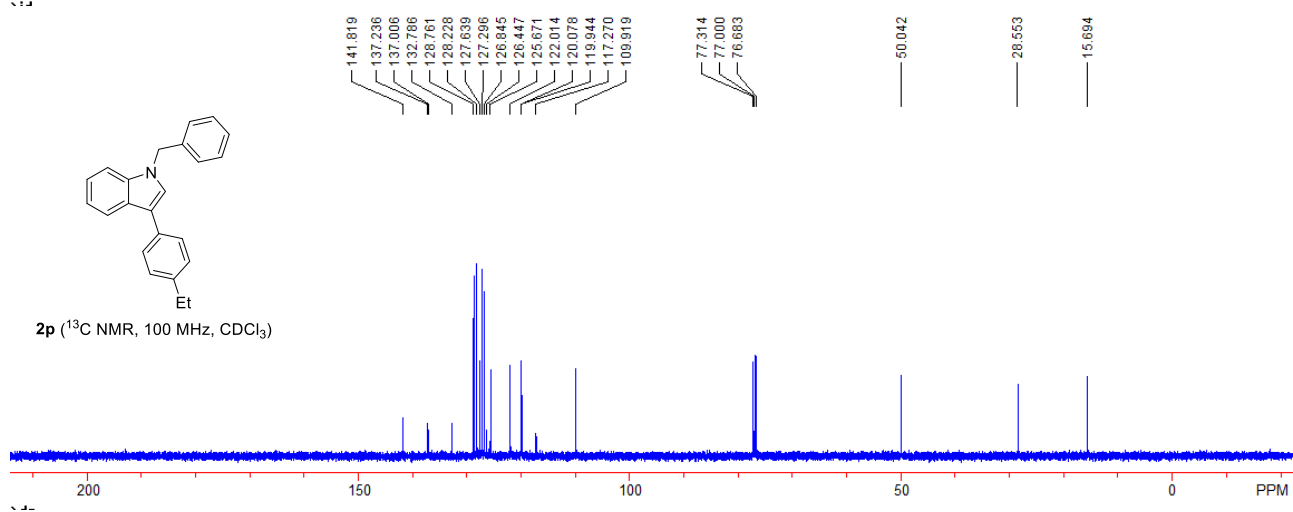

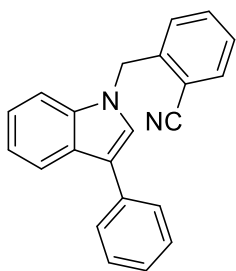

**Compound 2s:** Yield: 21.3 mg, 69%; a yellow oil; Eluent: PE/EA = 20/1.  $^1\text{H}$  NMR (400 MHz,  $\text{CDCl}_3$ , TMS)  $\delta$  5.51 (s, 2H), 6.86 (d,  $J = 7.6$  Hz, 1H), 7.15-7.39 (m, 7H), 7.42 (t,  $J = 7.2$  Hz, 2H), 7.66 (d,  $J = 7.6$  Hz, 3H), 7.96 (d,  $J = 6.8$  Hz, 1H);  $^{13}\text{C}\{^1\text{H}\}$ -NMR (101 MHz,  $\text{CDCl}_3$ , TMS)  $\delta_{\text{C}}$  48.0, 109.7, 110.6, 117.1, 118.0, 120.2, 120.46, 120.53, 125.8, 126.0, 126.4, 127.3, 127.4, 128.1, 128.7, 132.9, 133.3, 135.0, 136.8, 140.9; IR (neat):  $\nu$  3026, 2924, 2222, 1600, 1546, 1479, 1450, 1376, 1331, 1235, 1179, 1072, 968, 910, 808, 736, 696  $\text{cm}^{-1}$ ; HRMS (ESI-TOF) Calcd for  $\text{C}_{22}\text{H}_{17}\text{N}_2$   $[\text{M}+\text{H}]^+$ : 309.1386, found: 309.1388.

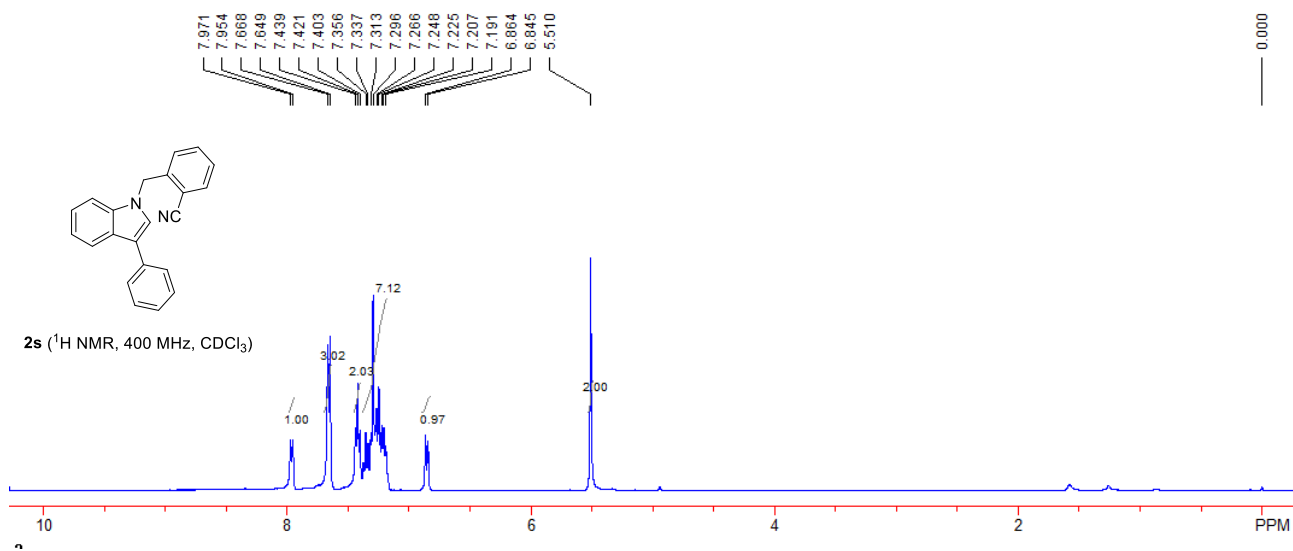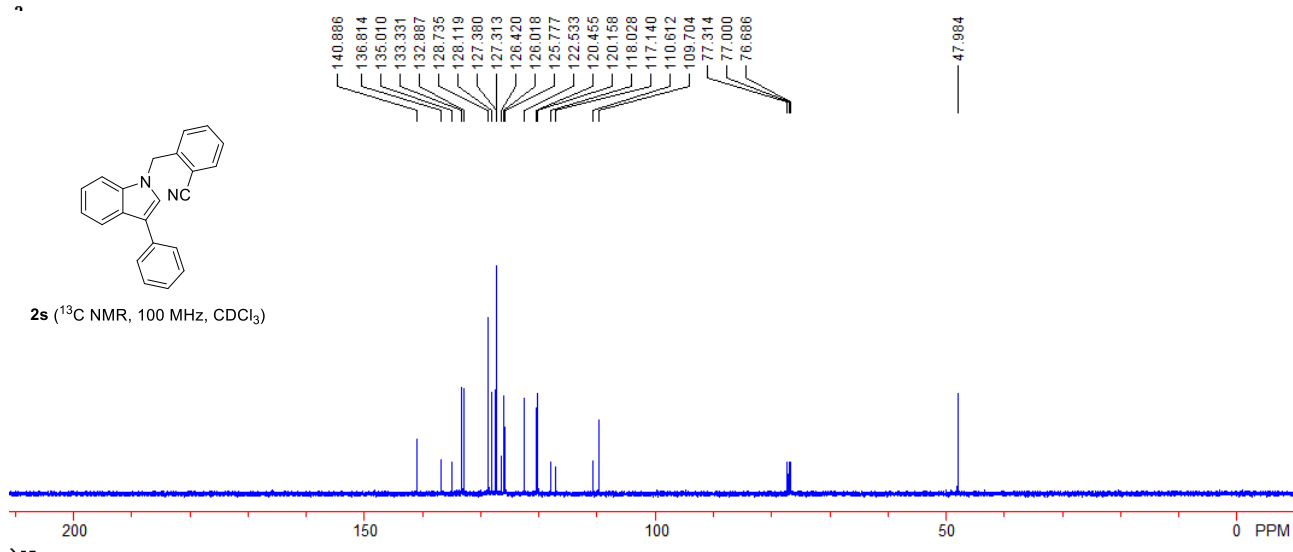

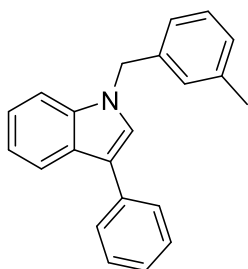

**Compound 2t:** Yield: 24.4 mg, 82%; a light yellow solid; Mp: 77-79 °C; Eluent: PE/EA = 20/1.  $^1\text{H}$  NMR (400 MHz,  $\text{CDCl}_3$ , TMS)  $\delta$  2.26 (s, 3H), 5.22 (s, 2H), 6.92 (d,  $J = 7.6$  Hz, 1H), 6.97 (s, 1H), 7.04 (d,  $J = 7.6$  Hz, 1H), 7.12-7.27 (m, 5H), 7.30 (d,  $J = 7.6$  Hz, 1H), 7.40 (t,  $J = 7.6$  Hz, 2H), 7.65 (d,  $J = 7.6$  Hz, 2H), 7.96 (d,  $J = 7.6$  Hz, 1H);  $^{13}\text{C}\{^1\text{H}\}$ -NMR (101 MHz,  $\text{CDCl}_3$ , TMS)  $\delta_{\text{C}}$  21.4, 50.0, 110.0, 117.2, 120.0, 120.1, 122.1, 124.0, 125.7, 125.9, 126.4, 127.3, 127.6, 128.5, 128.66, 128.71, 135.5, 137.08, 137.11, 138.5; IR (neat):  $\nu$  3045, 2972, 2923, 1601, 1539, 1491, 1468, 1435, 1374, 1302, 1238, 1088, 1035, 968, 904, 790, 727, 693  $\text{cm}^{-1}$ ; HRMS (EI-TOF) Calcd for  $\text{C}_{22}\text{H}_{19}\text{N}$   $[\text{M}]^+$ : 297.1512, found: 297.1518.

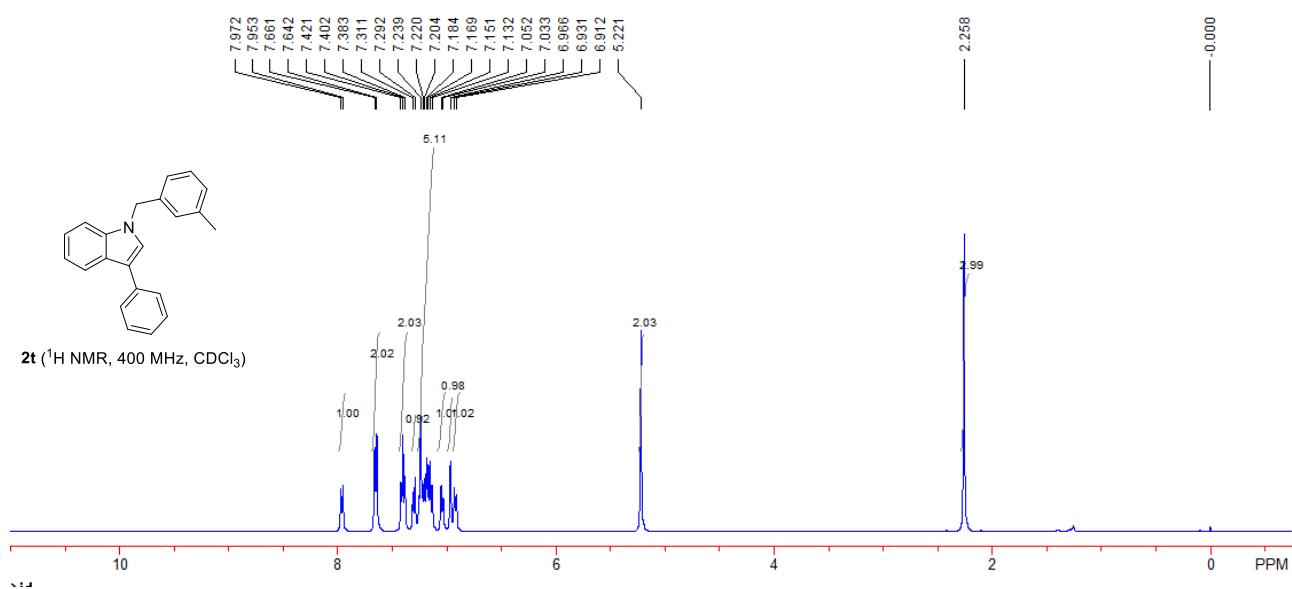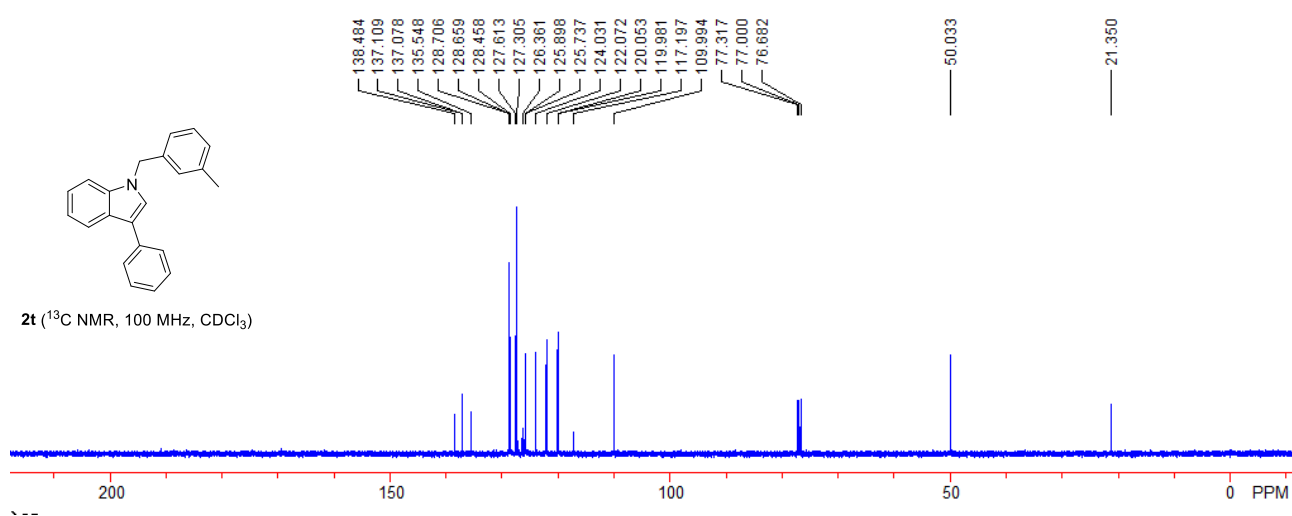

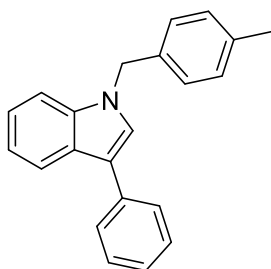

**Compound 2u:**<sup>12</sup> Yield: 26.4 mg, 89%; a yellow oil; Eluent: PE/EA = 20/1. <sup>1</sup>H NMR (400 MHz, CDCl<sub>3</sub>, TMS)  $\delta$  2.25 (s, 3H), 5.15 (s, 2H), 6.98 (d,  $J$  = 7.6 Hz, 2H), 7.04 (d,  $J$  = 8.0 Hz, 2H), 7.12-7.29 (m, 5H), 7.38 (t,  $J$  = 7.6 Hz, 2H), 7.63 (d,  $J$  = 8.0 Hz, 2H), 7.95 (d,  $J$  = 6.8 Hz, 1H); <sup>13</sup>C{<sup>1</sup>H}-NMR (101 MHz, CDCl<sub>3</sub>, TMS)  $\delta_C$  21.0, 49.8, 110.0, 117.1, 119.96, 120.03, 122.0, 125.7, 125.8, 126.3, 126.9, 127.3, 128.7, 129.4, 134.1, 135.5, 137.0, 137.3.

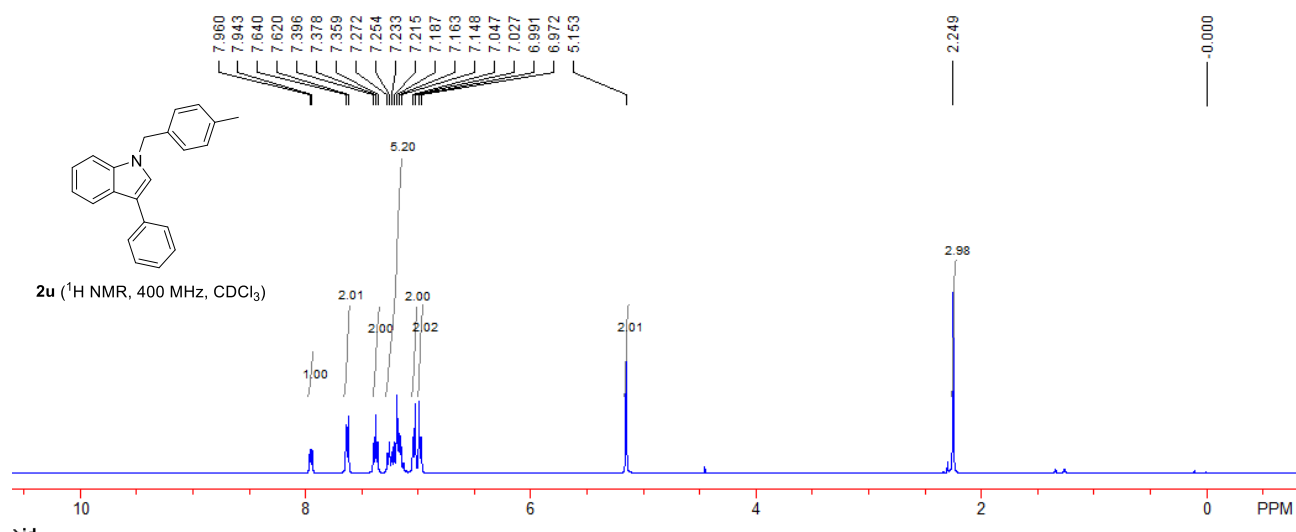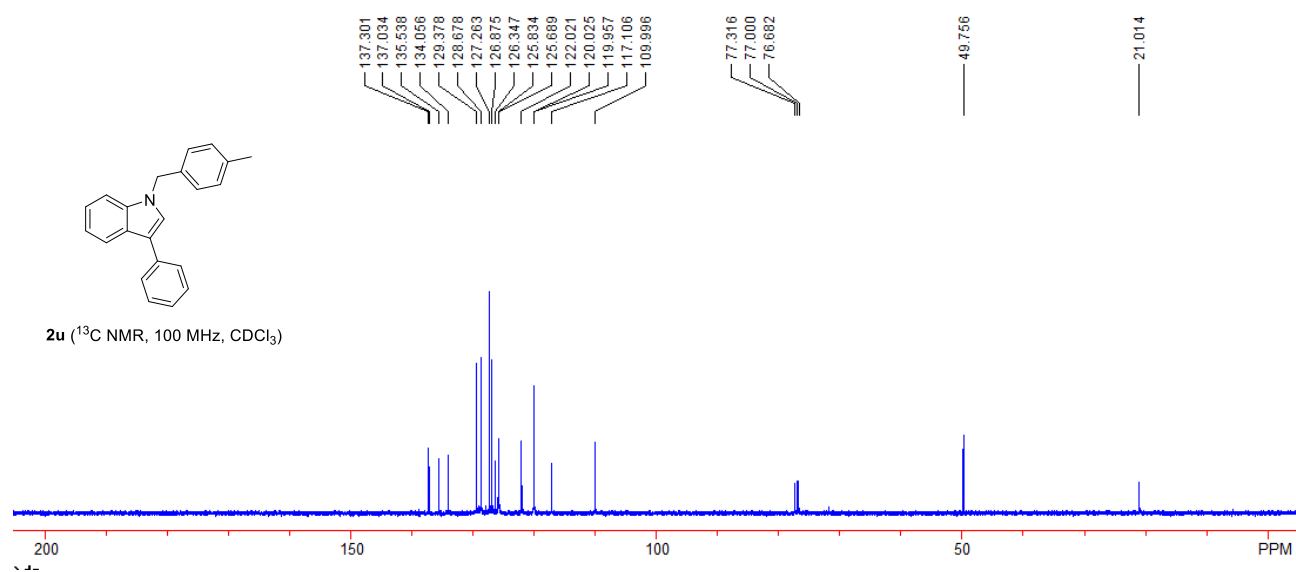

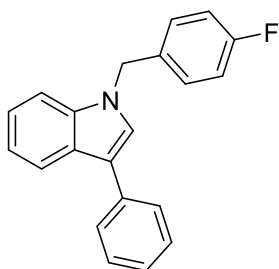

**Compound 2v:** Yield: 24.4 mg, 81%; a yellow oil; Eluent: PE/EA = 20/1.  $^1\text{H}$  NMR (400 MHz,  $\text{CDCl}_3$ , TMS)  $\delta$  5.28 (s, 2H), 6.97 (t,  $J = 8.8$  Hz, 2H), 7.08-7.14 (m, 2H), 7.15-7.30 (m, 5H), 7.43 (t,  $J = 7.2$  Hz, 2H), 7.66 (d,  $J = 7.6$  Hz, 2H), 7.97 (d,  $J = 8.0$  Hz, 1H);  $^{13}\text{C}\{^1\text{H}\}$ -NMR (101 MHz,  $\text{CDCl}_3$ , TMS)  $\delta_{\text{C}}$  49.4, 109.9, 115.7 (d,  $J = 21.5$  Hz), 117.5, 120.1, 120.2, 122.2, 125.7, 125.9, 126.5, 127.3, 128.6 (d,  $J = 7.4$  Hz), 128.7, 132.9 (d,  $J = 3.2$  Hz), 135.4, 136.9, 162.2 (d,  $J = 244.0$  Hz);  $^{19}\text{F}$  NMR (376 MHz,  $\text{CDCl}_3$ )  $\delta$  -114.6; IR (neat):  $\nu$  3047, 2924, 1601, 1546, 1508, 1464, 1350, 1220, 1177, 1155, 1073, 972, 819, 737, 696  $\text{cm}^{-1}$ ; HRMS (EI-TOF) Calcd for  $\text{C}_{21}\text{H}_{16}\text{FN}$   $[\text{M}]^+$ : 301.1261, found: 301.1271.

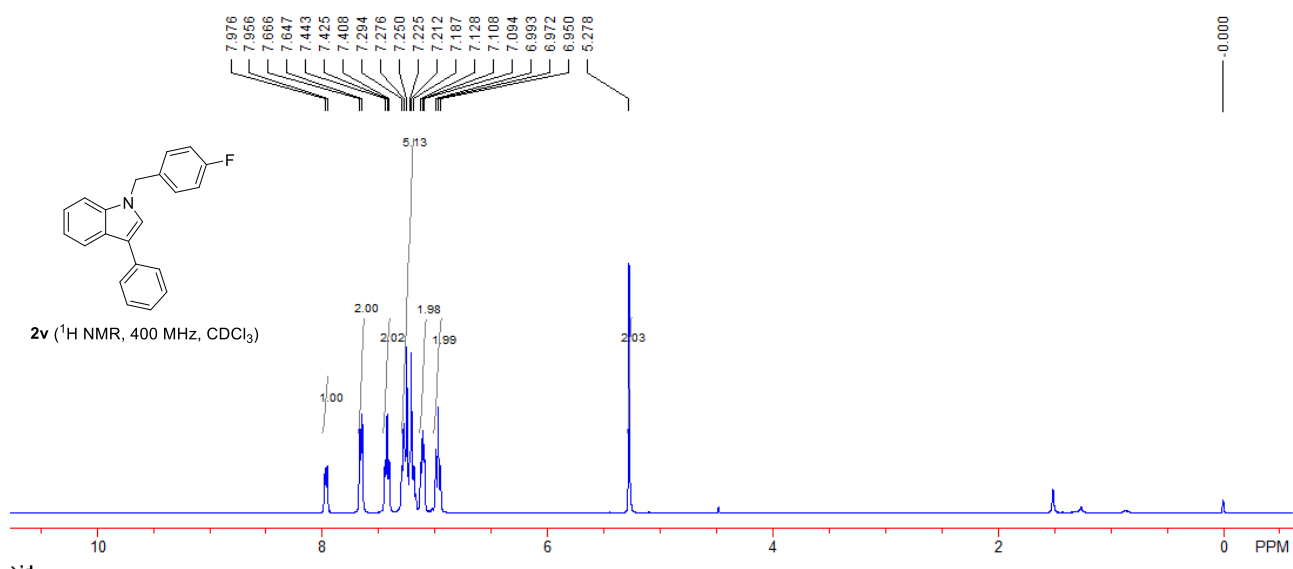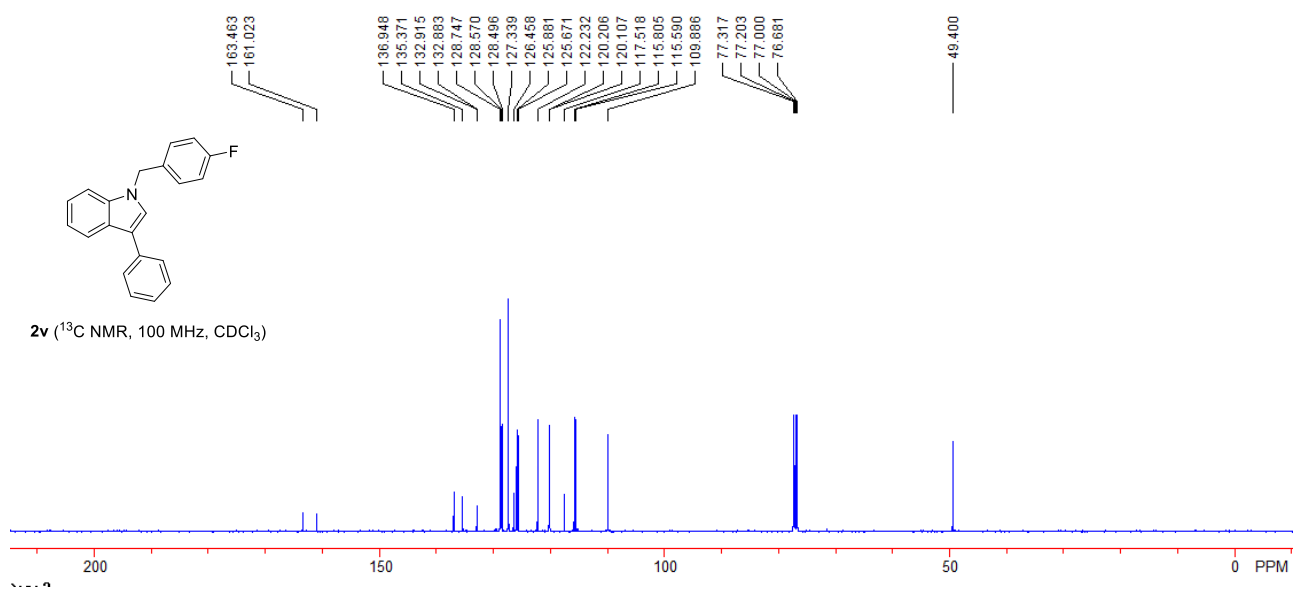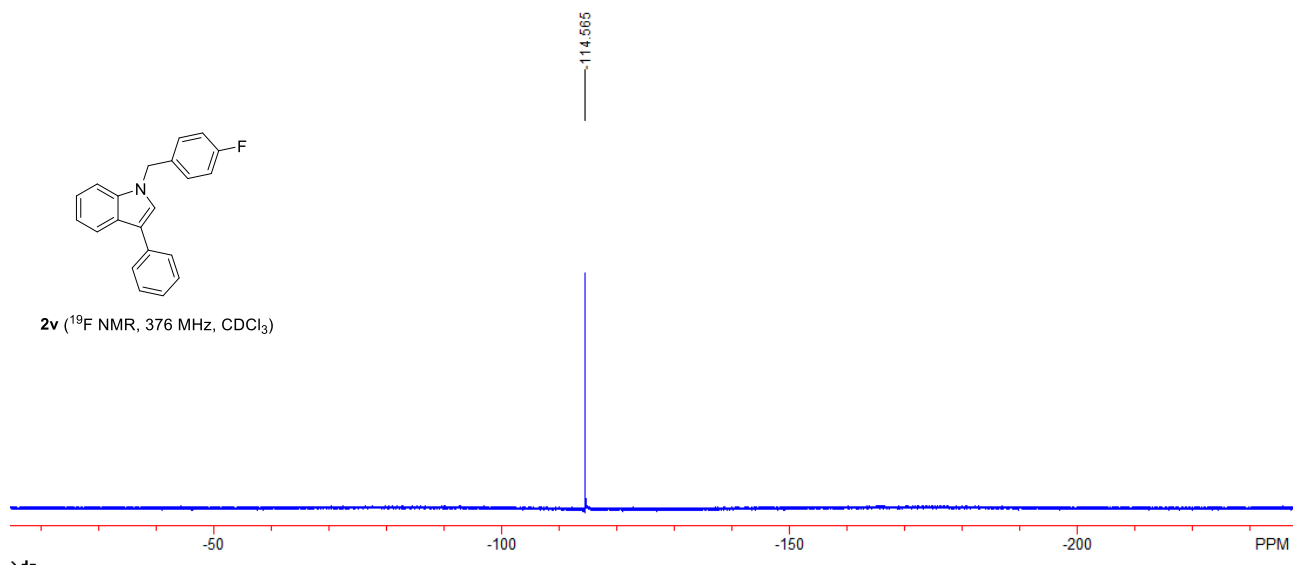

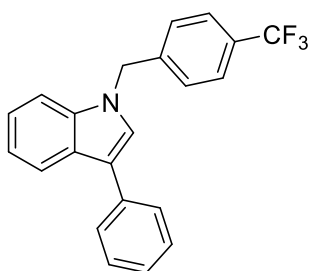

**Compound 2w:** Yield: 30.5 mg, 87%; a yellow oil; Eluent: PE/EA = 20/1.  $^1\text{H}$  NMR (400 MHz,  $\text{CDCl}_3$ , TMS)  $\delta$  5.36 (s, 2H), 7.16-7.31 (m, 7H), 7.43 (t,  $J$  = 8.0 Hz, 2H), 7.53 (d,  $J$  = 8.0 Hz, 2H), 7.66 (d,  $J$  = 7.2 Hz, 2H), 7.95-8.00 (m, 1H);  $^{13}\text{C}\{^1\text{H}\}$ -NMR (101 MHz,  $\text{CDCl}_3$ , TMS)  $\delta_{\text{C}}$  49.6, 109.8, 117.8, 120.2, 120.4, 122.4, 124.0 (q,  $J$  = 270.7 Hz), 125.7, 125.8 (q,  $J$  = 3.8 Hz), 126.0, 126.5, 126.9, 127.4, 128.8, 129.9 (q,  $J$  = 32.0 Hz), 135.2, 136.9, 141.3;  $^{19}\text{F}$  NMR (376 MHz,  $\text{CDCl}_3$ )  $\delta$  -62.5; IR (neat):  $\nu$  3049, 1602, 1546, 1464, 1418, 1320, 1161, 1064, 1016, 936, 819, 738, 697  $\text{cm}^{-1}$ ; HRMS (EI-TOF) Calcd for  $\text{C}_{22}\text{H}_{16}\text{F}_3\text{N}$   $[\text{M}]^+$ : 351.1229, found: 351.1240.

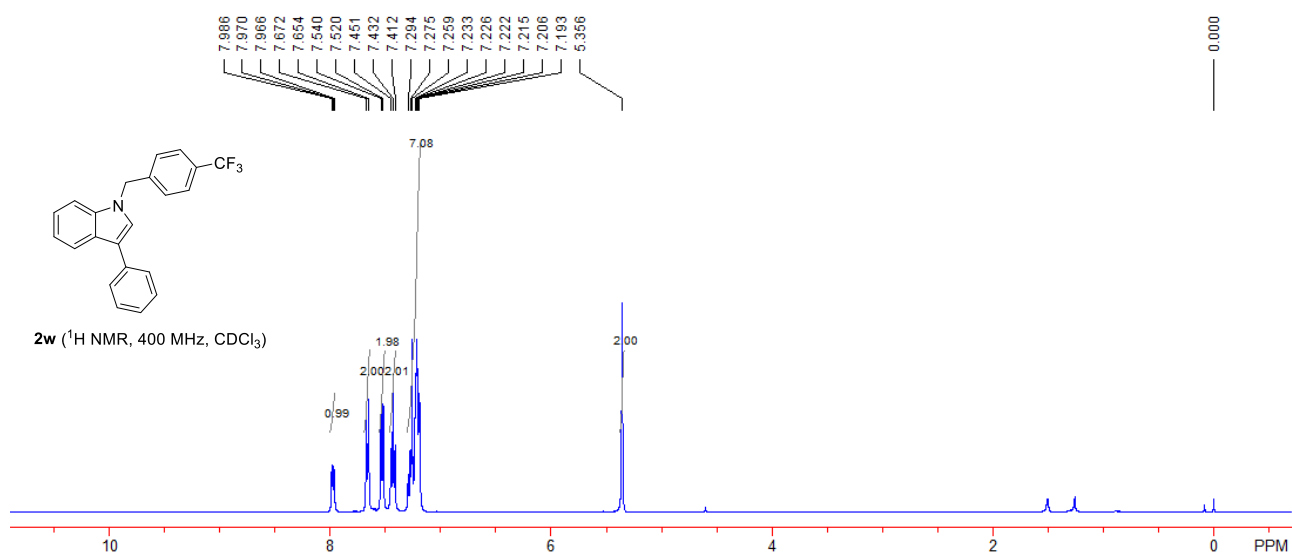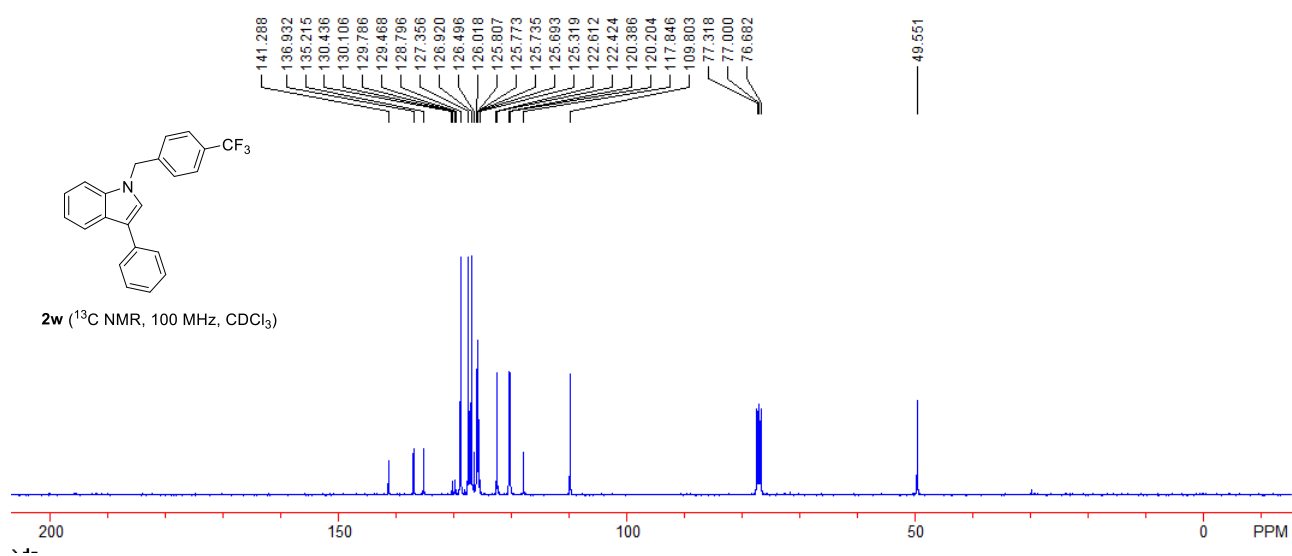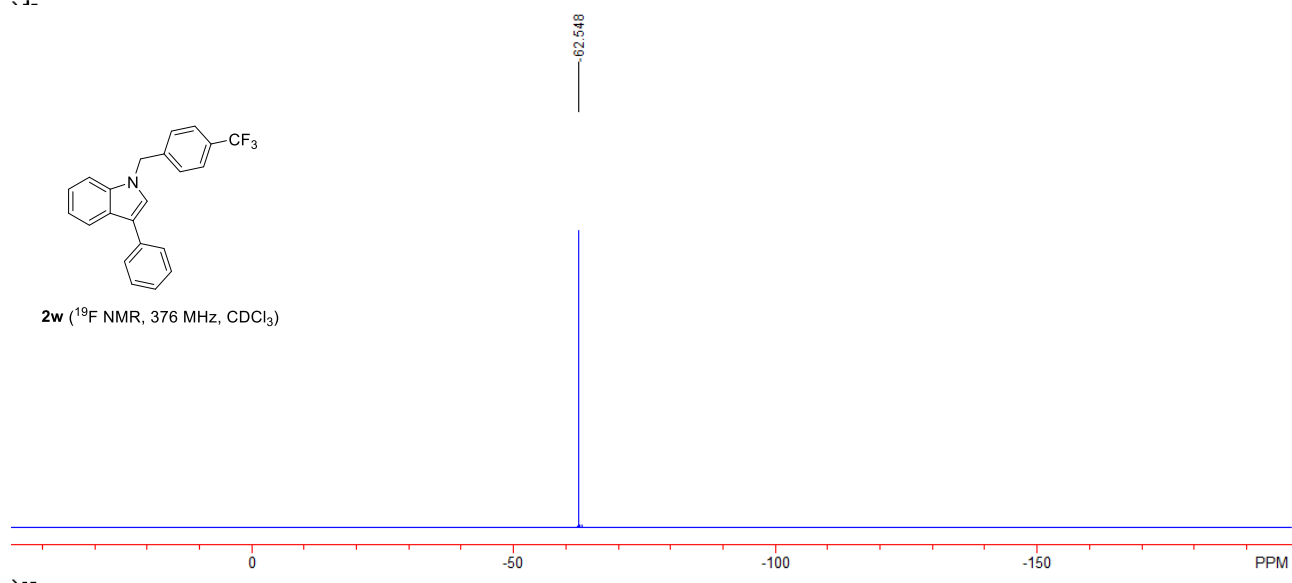

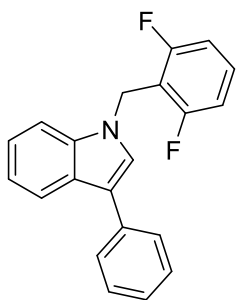

**Compound 2x:** Yield: 27.1 mg, 85%; a light yellow solid; Mp: 89-91 °C; Eluent: PE/EA = 20/1.  $^1\text{H}$  NMR (400 MHz,  $\text{CDCl}_3$ , TMS)  $\delta$  5.33 (s, 2H), 6.85 (t,  $J$  = 8.4 Hz, 2H), 7.13-7.31 (m, 4H), 7.36-7.44 (m, 3H), 7.58 (d,  $J$  = 8.8 Hz, 1H), 7.63 (d,  $J$  = 7.6 Hz, 2H), 7.90 (d,  $J$  = 7.6 Hz, 1H);  $^{13}\text{C}\{^1\text{H}\}$ -NMR (101 MHz,  $\text{CDCl}_3$ , TMS)  $\delta_{\text{C}}$  63.5 (t,  $J$  = 3.5 Hz), 109.7 (d,  $J$  = 2.0 Hz), 111.6 (dd,  $J_1$  = 19.4 Hz,  $J_2$  = 6.1 Hz), 113.0 (t,  $J$  = 19.7 Hz), 117.5, 119.8, 120.1, 122.2, 125.8, 126.2, 127.4, 128.7, 130.2 (t,  $J$  = 10.4 Hz), 135.4, 136.7, 161.4 (dd,  $J_1$  = 248.7 Hz,  $J_2$  = 7.8 Hz);  $^{19}\text{F}$  NMR (376 MHz,  $\text{CDCl}_3$ )  $\delta$  -113.8; IR (neat):  $\nu$  3053, 2920, 2852, 1623, 1598, 1545, 1466, 1390, 1352, 1304, 1231, 1145, 1017, 967, 902, 816, 790, 728, 698  $\text{cm}^{-1}$ ; HRMS (EI-TOF) Calcd for  $\text{C}_{21}\text{H}_{15}\text{F}_2\text{N}$   $[\text{M}]^+$ : 319.1167, found: 319.1174.

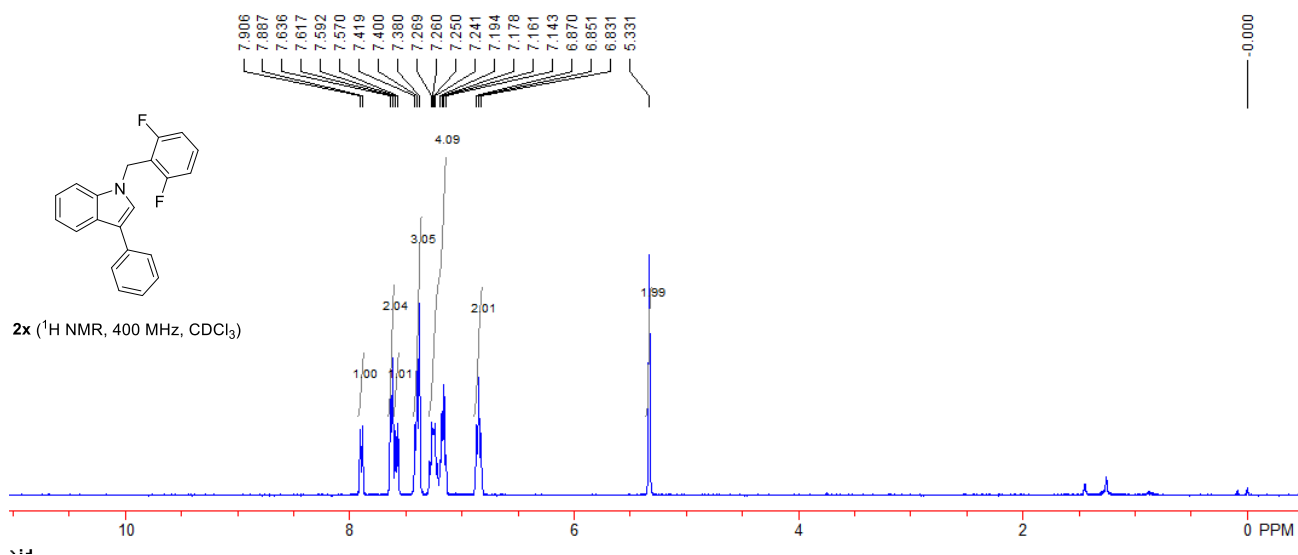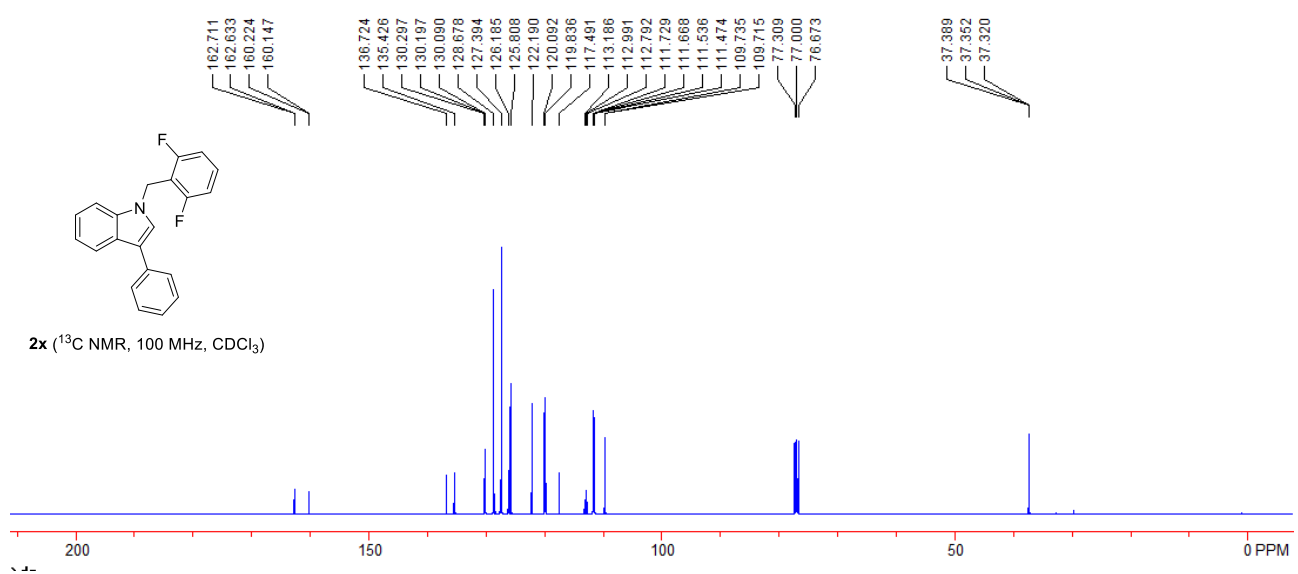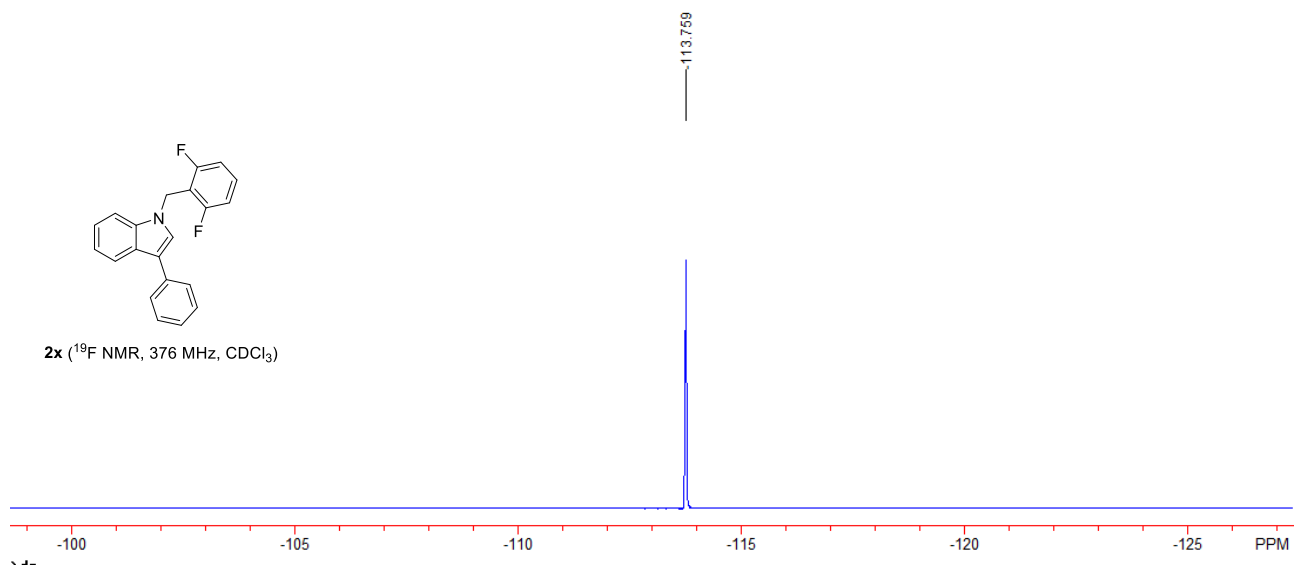

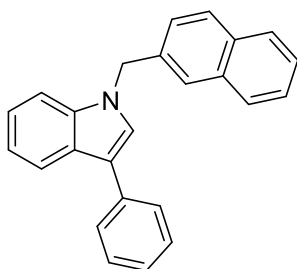

**Compound 2y:** Yield: 25.3 mg, 76%; a light yellow solid; Mp: 135-137 °C; Eluent: PE/EA = 20/1.  $^1\text{H}$  NMR (400 MHz,  $\text{CDCl}_3$ , TMS)  $\delta$  5.49 (s, 2H), 7.16-7.23 (m, 2H), 7.28 (d,  $J$  = 7.6 Hz, 2H), 7.33-7.48 (m, 6H), 7.62 (s, 1H), 7.68 (d,  $J$  = 7.6 Hz, 2H), 7.72-7.82 (m, 3H), 7.99 (d,  $J$  = 6.8 Hz, 1H);  $^{13}\text{C}\{^1\text{H}\}$ -NMR (101 MHz,  $\text{CDCl}_3$ , TMS)  $\delta_{\text{C}}$  50.4, 110.0, 117.4, 120.07, 120.15, 120.19, 124.9, 125.7, 125.8, 125.9, 126.1, 126.4, 126.5, 127.4, 127.7, 127.8, 128.7, 132.9, 133.3, 134.6, 135.5, 137.2; IR (neat):  $\nu$  3054, 3023, 2922, 2852, 1666, 1599, 1544, 1508, 1466, 1433, 1386, 1334, 1261, 1158, 1014, 972, 910, 815, 769, 698  $\text{cm}^{-1}$ ; HRMS (FI-TOF) Calcd for  $\text{C}_{25}\text{H}_{19}\text{N}$   $[\text{M}]^+$ : 333.1512, found: 333.1516.

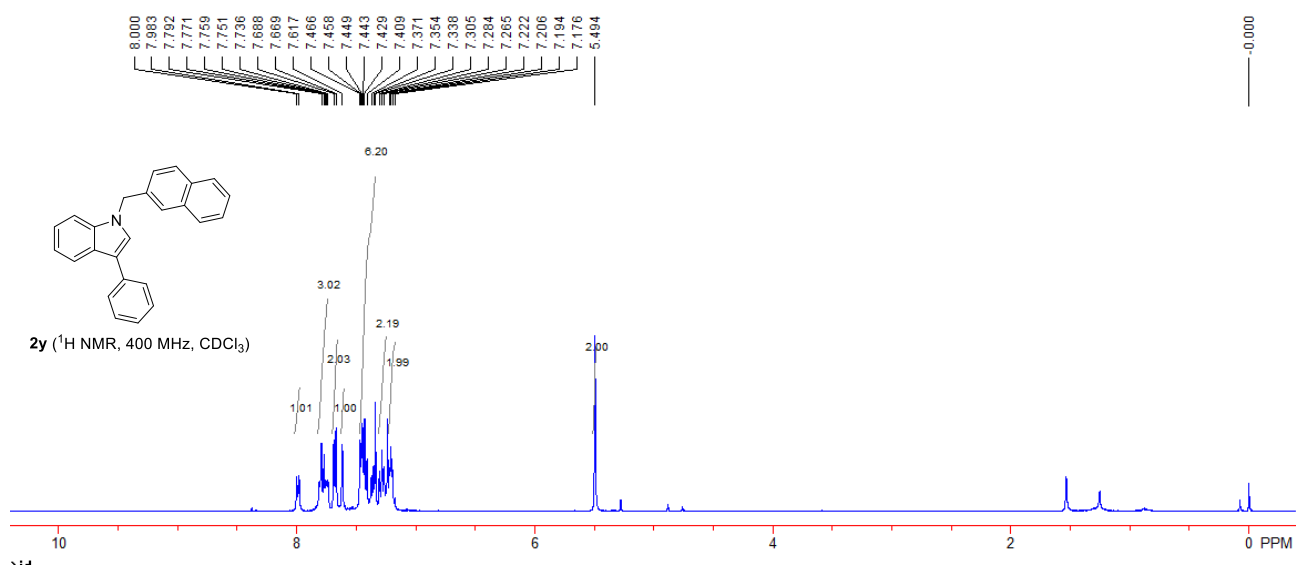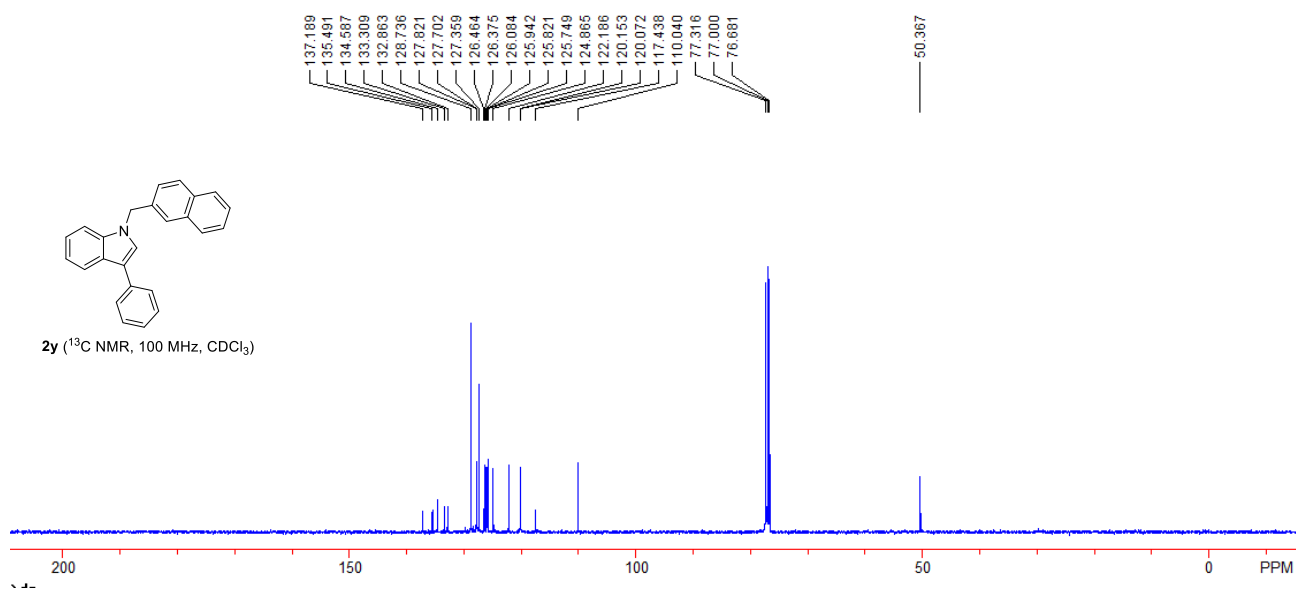

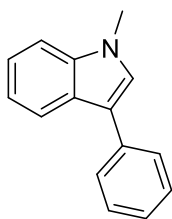

**Compound 2z:**<sup>14</sup> Yield: 18.4 mg, 89%; a yellow oil; Eluent: PE/EA = 20/1. <sup>1</sup>H NMR (400 MHz, CDCl<sub>3</sub>, TMS)  $\delta$  3.70 (s, 3H), 7.12-7.19 (m, 2H), 7.21-7.27 (m, 2H), 7.30 (d,  $J$  = 8.4 Hz, 1H), 7.40 (t,  $J$  = 8.0 Hz, 2H), 7.63 (d,  $J$  = 7.6 Hz, 2H), 7.94 (d,  $J$  = 8.0 Hz, 1H); <sup>13</sup>C{<sup>1</sup>H}-NMR (101 MHz, CDCl<sub>3</sub>, TMS)  $\delta$ <sub>C</sub> 32.7, 109.5, 116.5, 119.8, 121.9, 125.6, 126.1, 126.5, 127.2, 128.7, 135.6, 137.4.

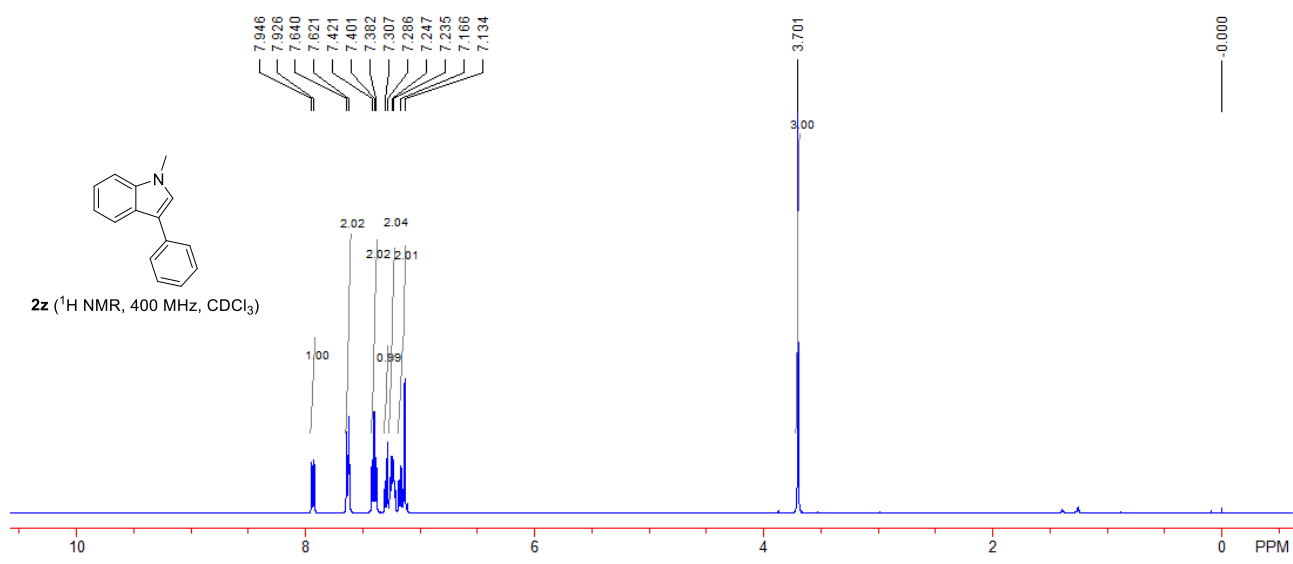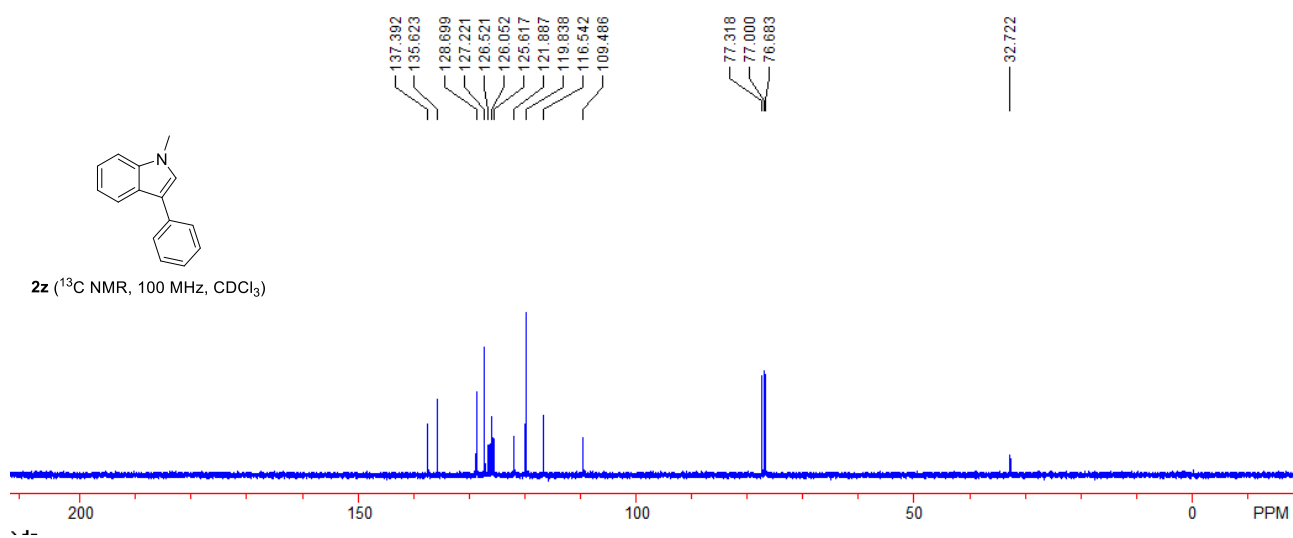

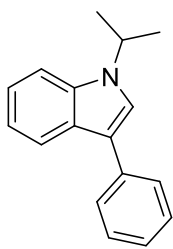

**Compound 2aa:**<sup>15</sup> Yield: 18.3 mg, 78%; a yellow oil; Eluent: PE/EA = 20/1. <sup>1</sup>H NMR (400 MHz, CDCl<sub>3</sub>, TMS)  $\delta$  1.51 (d,  $J$  = 6.4 Hz, 6H), 4.60-4.70 (m, 1H), 7.16 (t,  $J$  = 7.2 Hz, 1H), 7.24 (t,  $J$  = 7.6 Hz, 2H), 7.34-7.45 (m, 4H), 7.66 (d,  $J$  = 7.2 Hz, 2H), 7.95 (d,  $J$  = 8.0 Hz, 1H); <sup>13</sup>C{<sup>1</sup>H}-NMR (101 MHz, CDCl<sub>3</sub>, TMS)  $\delta_C$  22.7, 47.0, 109.7, 116.8, 119.8, 119.9, 121.4, 121.6, 125.6, 126.2, 127.3, 128.7, 135.8, 136.3.

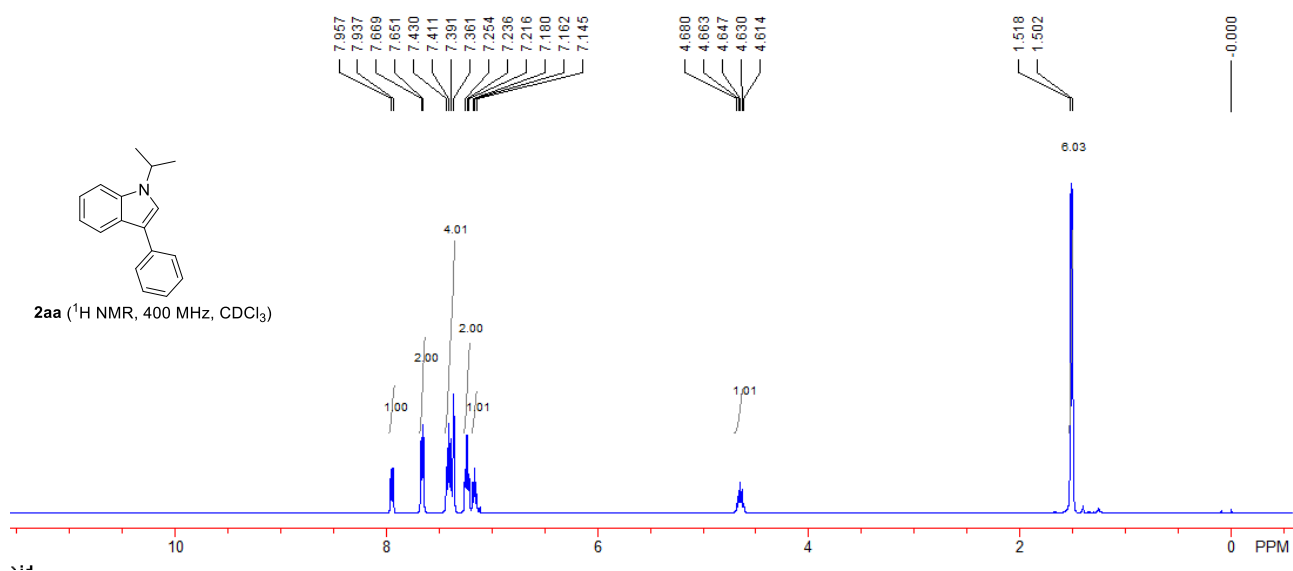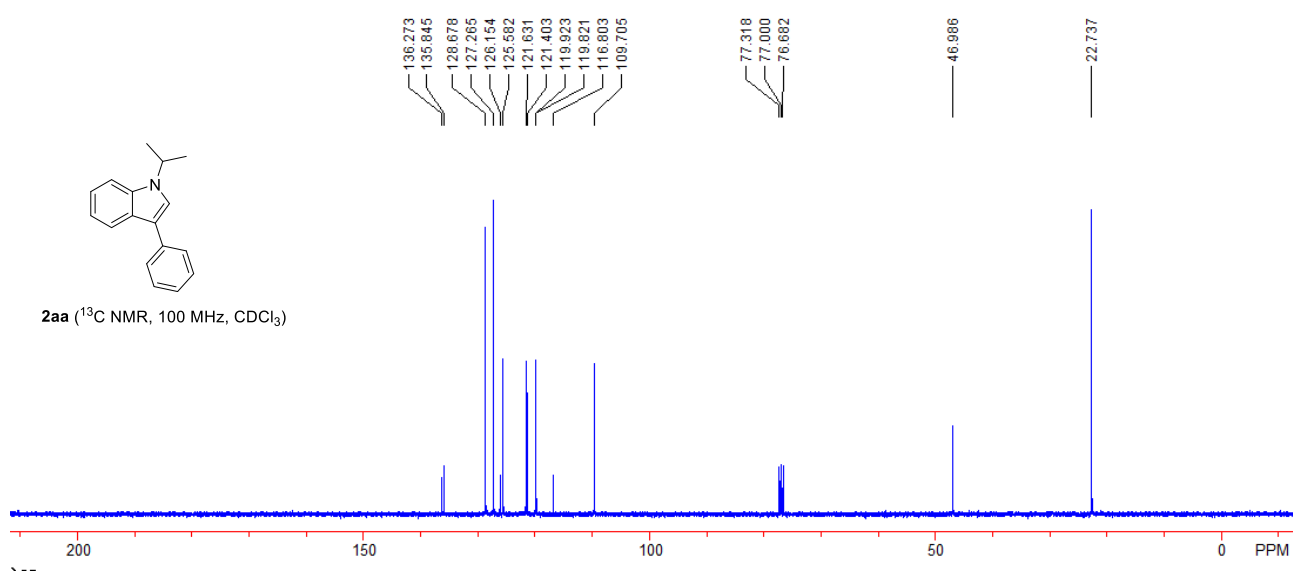

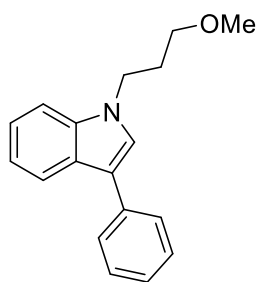

**Compound 2ab:** Yield: 21.5 mg, 81%; a yellow oil; Eluent: PE/EA = 20/1.  $^1\text{H}$  NMR (400 MHz,  $\text{CDCl}_3$ , TMS)  $\delta$  2.00-2.10 (m, 2H), 3.27 (t,  $J = 5.6$  Hz, 2H), 3.30 (s, 3H), 4.23 (t,  $J = 6.8$  Hz, 2H), 7.16 (t,  $J = 7.6$  Hz, 1H), 7.21-7.28 (m, 3H), 7.35-7.45 (m, 3H), 7.65 (d,  $J = 7.6$  Hz, 2H), 7.94 (d,  $J = 7.6$  Hz, 1H);  $^{13}\text{C}\{^1\text{H}\}$ -NMR (101 MHz,  $\text{CDCl}_3$ , TMS)  $\delta_{\text{C}}$  30.2, 42.8, 58.6, 68.9, 109.7, 116.7, 119.8, 119.9, 121.8, 125.6, 125.7, 126.2, 127.2, 128.7, 135.7, 136.8; IR (neat):  $\nu$  2922, 2873, 1601, 1545, 1478, 1372, 1226, 1113, 1016, 940, 908, 766, 737, 696  $\text{cm}^{-1}$ ; HRMS (EI-TOF) Calcd for  $\text{C}_{18}\text{H}_{19}\text{NO}$   $[\text{M}]^+$ : 265.1461, found: 265.1465.

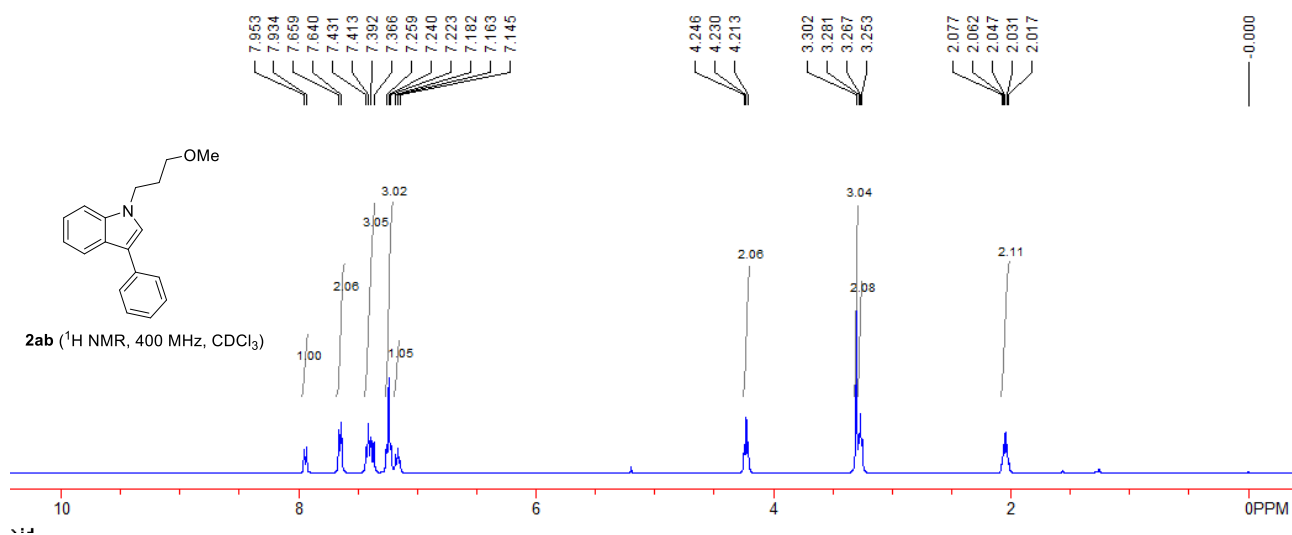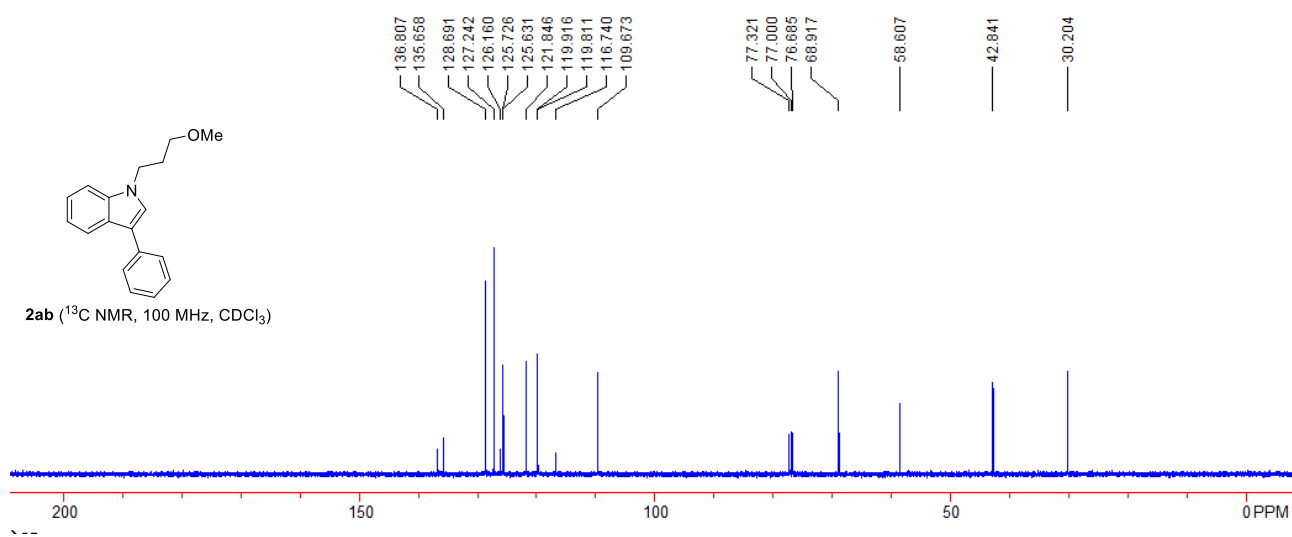

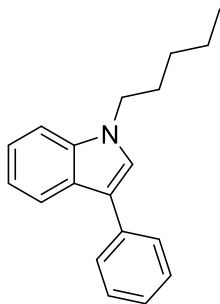

**Compound 2ac:** Yield: 21.6 mg, 82%; a light yellow solid; Mp: 73-75 °C; Eluent: PE/EA = 20/1.  $^1\text{H}$  NMR (400 MHz,  $\text{CDCl}_3$ , TMS)  $\delta$  0.86 (t,  $J$  = 6.8 Hz, 3H), 1.20-1.36 (m, 4H), 1.75-1.86 (m, 2H), 4.05 (t,  $J$  = 7.2 Hz, 2H), 7.16 (t,  $J$  = 7.6 Hz, 1H), 7.20-7.27 (m, 3H), 7.33 (d,  $J$  = 8.4 Hz, 1H), 7.40 (t,  $J$  = 8.0 Hz, 2H), 7.65 (d,  $J$  = 7.2 Hz, 2H), 7.95 (d,  $J$  = 7.6 Hz, 1H);  $^{13}\text{C}\{^1\text{H}\}$ -NMR (101 MHz,  $\text{CDCl}_3$ , TMS)  $\delta_{\text{C}}$  13.9, 22.3, 29.1, 29.9, 46.3, 109.7, 116.5, 119.7, 119.9, 121.7, 125.5, 125.6, 126.2, 127.2, 128.7, 135.7, 136.7; IR (neat):  $\nu$  3046, 2927, 2857, 1601, 1544, 1465, 1391, 1371, 1333, 1219, 1184, 1016, 940, 810, 765, 735, 696  $\text{cm}^{-1}$ ; HRMS (EI-TOF) Calcd for  $\text{C}_{19}\text{H}_{21}\text{N}$   $[\text{M}]^+$ : 263.1669, found: 263.1673.

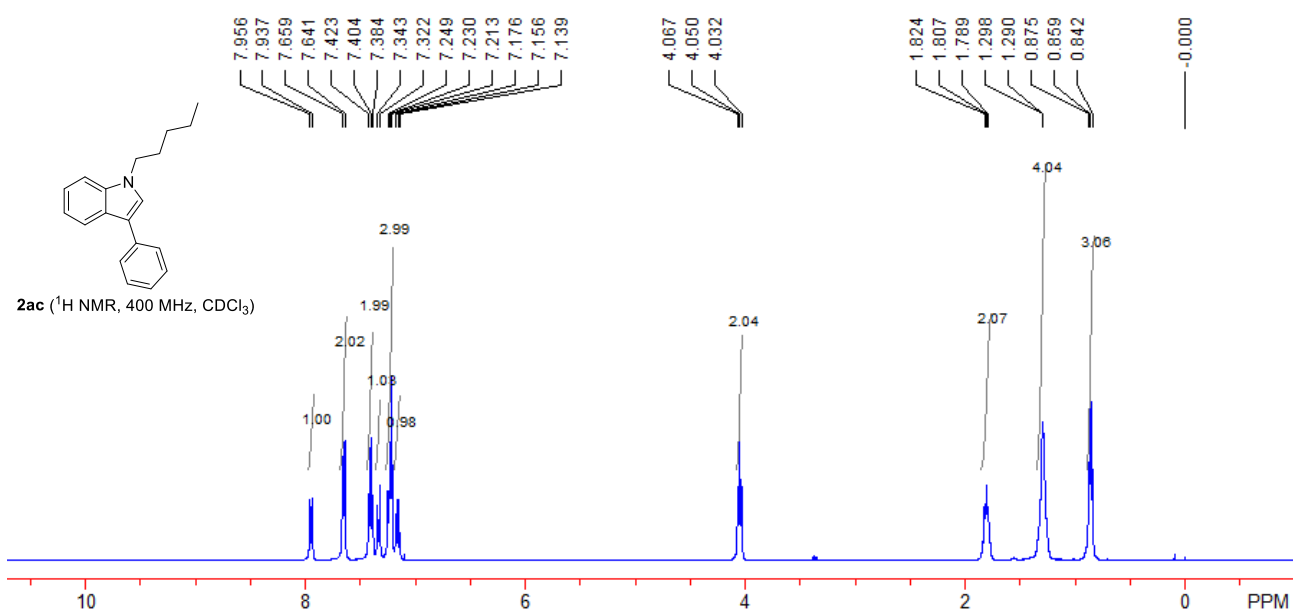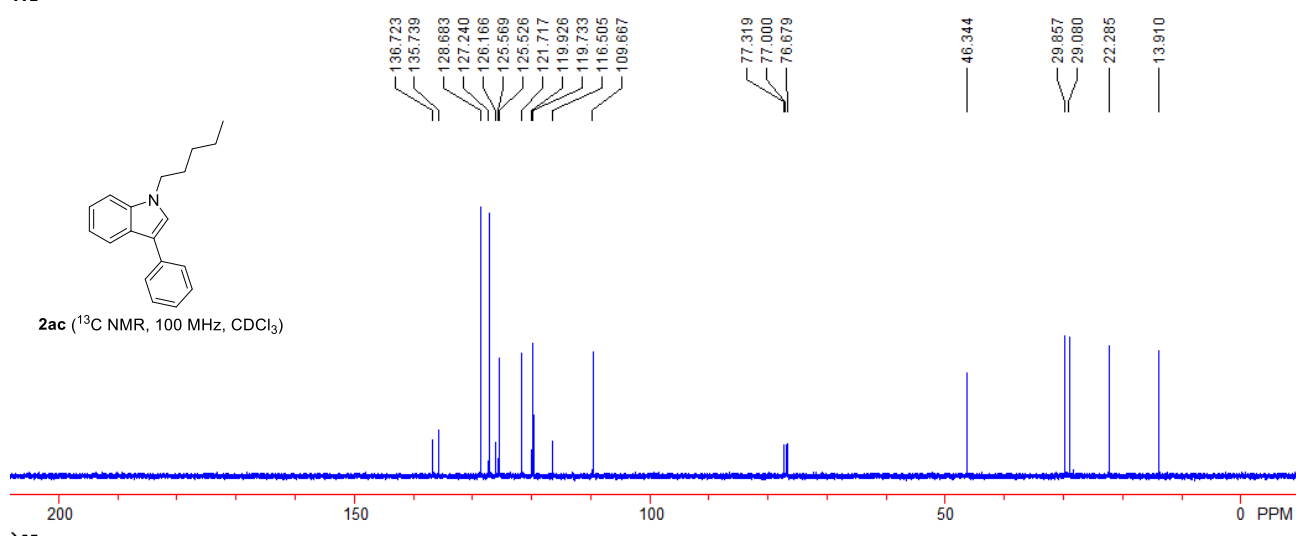

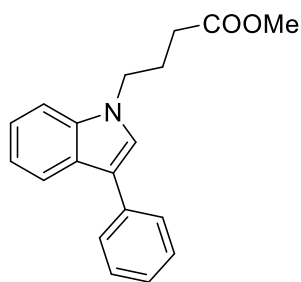

**Compound 2ad:** Yield: 24.6 mg, 84%; a yellow oil; Eluent: PE/EA = 20/1.  $^1\text{H}$  NMR (400 MHz,  $\text{CDCl}_3$ , TMS)  $\delta$  2.12-2.22 (m, 2H), 2.30 (t,  $J = 6.8$  Hz, 2H), 3.64 (s, 3H), 4.19 (t,  $J = 6.8$  Hz, 2H), 7.17 (t,  $J = 8.0$  Hz, 1H), 7.22-7.29 (m, 3H), 7.37 (d,  $J = 8.0$  Hz, 1H), 7.42 (t,  $J = 7.6$  Hz, 2H), 7.65 (d,  $J = 7.6$  Hz, 2H), 7.94 (d,  $J = 8.0$  Hz, 1H);  $^{13}\text{C}\{^1\text{H}\}$ -NMR (101 MHz,  $\text{CDCl}_3$ , TMS)  $\delta_{\text{C}}$  25.3, 30.8, 45.2, 51.6, 109.6, 117.0, 119.9, 120.0, 122.0, 125.4, 125.7, 126.3, 127.3, 128.7, 135.5, 136.7, 173.1; IR (neat):  $\nu$  2948, 1731, 1601, 1545, 1465, 1391, 1334, 1196, 1161, 1017, 766, 737, 697  $\text{cm}^{-1}$ ; HRMS (EI-TOF) Calcd for  $\text{C}_{19}\text{H}_{19}\text{NO}_2$   $[\text{M}]^+$ : 293.1410, found: 293.1414.

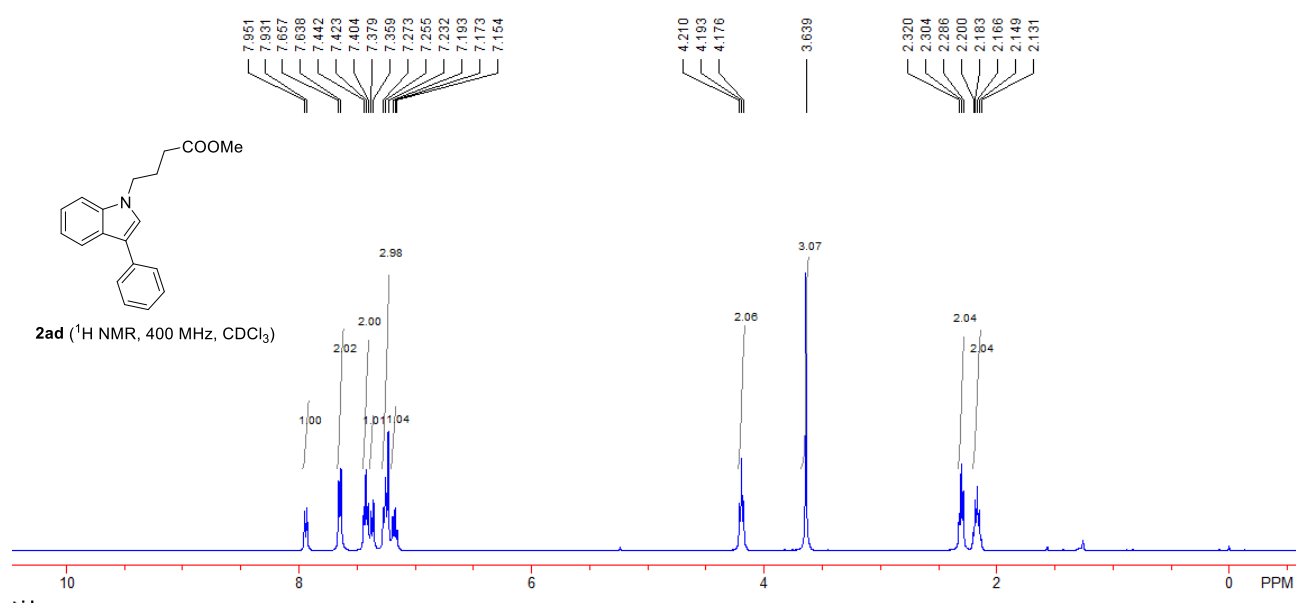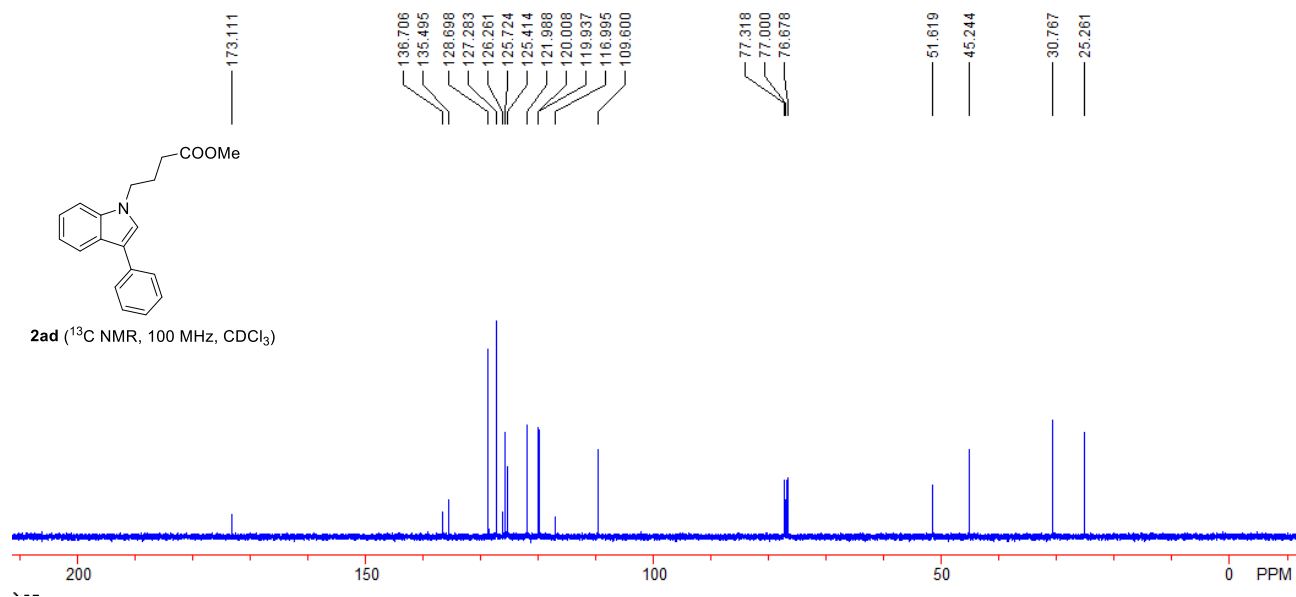

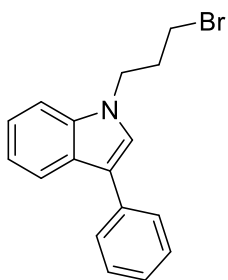

**Compound 2ae:** Yield: 16.9 mg, 54%; a yellow oil; Eluent: PE/EA = 20/1.  $^1\text{H}$  NMR (400 MHz,  $\text{CDCl}_3$ , TMS)  $\delta$  2.30-2.40 (m, 2H), 3.31 (t,  $J = 6.0$  Hz, 2H), 4.34 (t,  $J = 6.4$  Hz, 2H), 7.16-7.22 (m, 1H), 7.23-7.32 (m, 3H), 7.37-7.48 (m, 3H), 7.65 (d,  $J = 6.8$  Hz, 2H), 7.95 (d,  $J = 7.2$  Hz, 1H);  $^{13}\text{C}\{^1\text{H}\}$ -NMR (101 MHz,  $\text{CDCl}_3$ , TMS)  $\delta_{\text{C}}$  30.5, 32.6, 44.0, 109.6, 117.2, 120.09, 120.12, 122.1, 125.6, 125.8, 126.4, 127.3, 128.8, 135.4, 136.6; IR (neat):  $\nu$  3047, 2920, 1600, 1545, 1478, 1390, 1373, 1283, 1262, 1245, 1216, 1072, 1016, 940, 766, 737, 696  $\text{cm}^{-1}$ ; HRMS (ESI-TOF) Calcd for  $\text{C}_{17}\text{H}_{17}\text{NBr}$   $[\text{M}+\text{H}]^+$ : 314.0539, found: 314.0543.

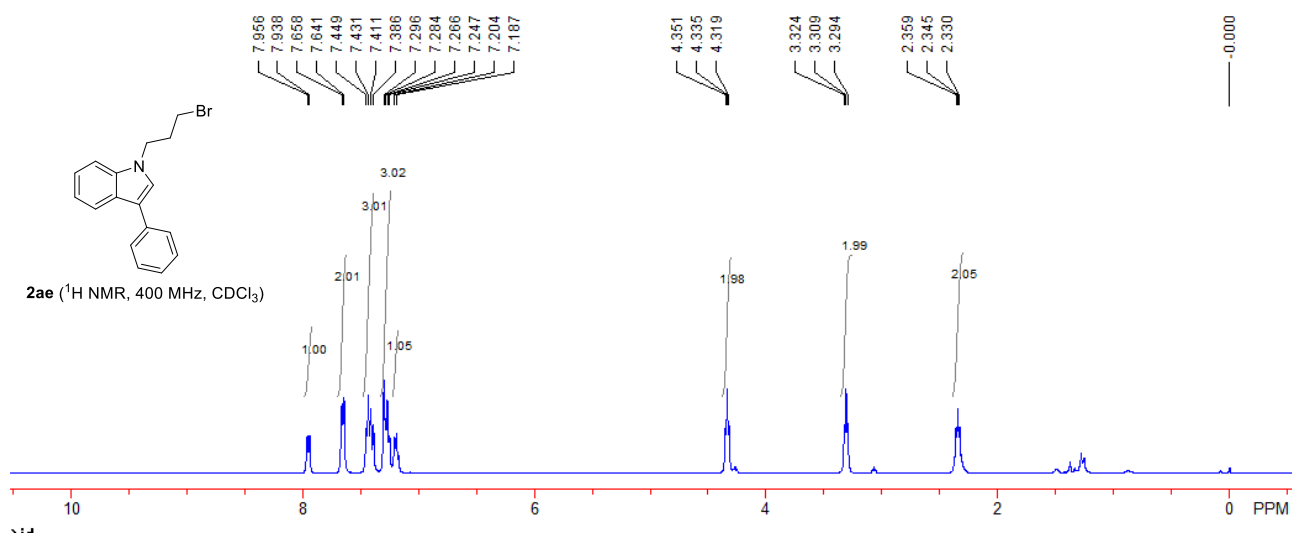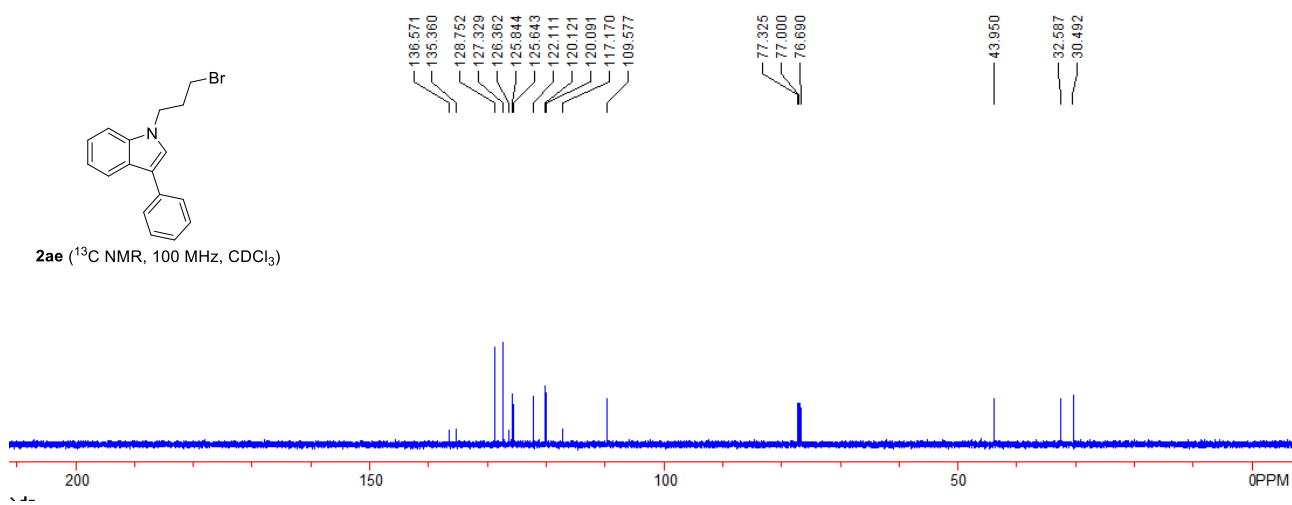

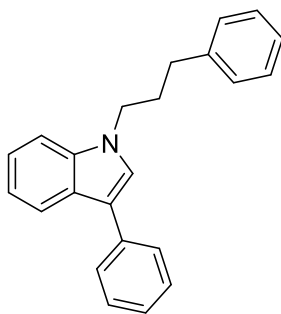

**Compound 2af:** Yield: 24.0 mg, 77%; a yellow oil; Eluent: PE/EA = 20/1.  $^1\text{H}$  NMR (400 MHz,  $\text{CDCl}_3$ , TMS)  $\delta$  2.11-2.20 (m, 2H), 2.61 (t,  $J = 7.6$  Hz, 2H), 4.08 (t,  $J = 7.2$  Hz, 2H), 7.10-7.30 (m, 10H), 7.41 (t,  $J = 7.6$  Hz, 2H), 7.65 (d,  $J = 7.6$  Hz, 2H), 7.95 (d,  $J = 8.0$  Hz, 1H);  $^{13}\text{C}\{^1\text{H}\}$ -NMR (101 MHz,  $\text{CDCl}_3$ , TMS)  $\delta_{\text{C}}$  31.3, 32.9, 45.6, 109.7, 116.7, 119.8, 120.0, 121.8, 125.4, 125.6, 126.1, 126.2, 127.3, 128.3, 128.4, 128.7, 135.6, 136.7, 140.8; IR (neat):  $\nu$  3024, 2917, 2850, 1600, 1544, 1494, 1465, 1391, 1372, 1260, 1162, 1085, 1016, 938, 808, 766, 736, 695  $\text{cm}^{-1}$ ; HRMS (EI-TOF) Calcd for  $\text{C}_{23}\text{H}_{21}\text{N}$   $[\text{M}]^+$ : 311.1669, found: 311.1680.

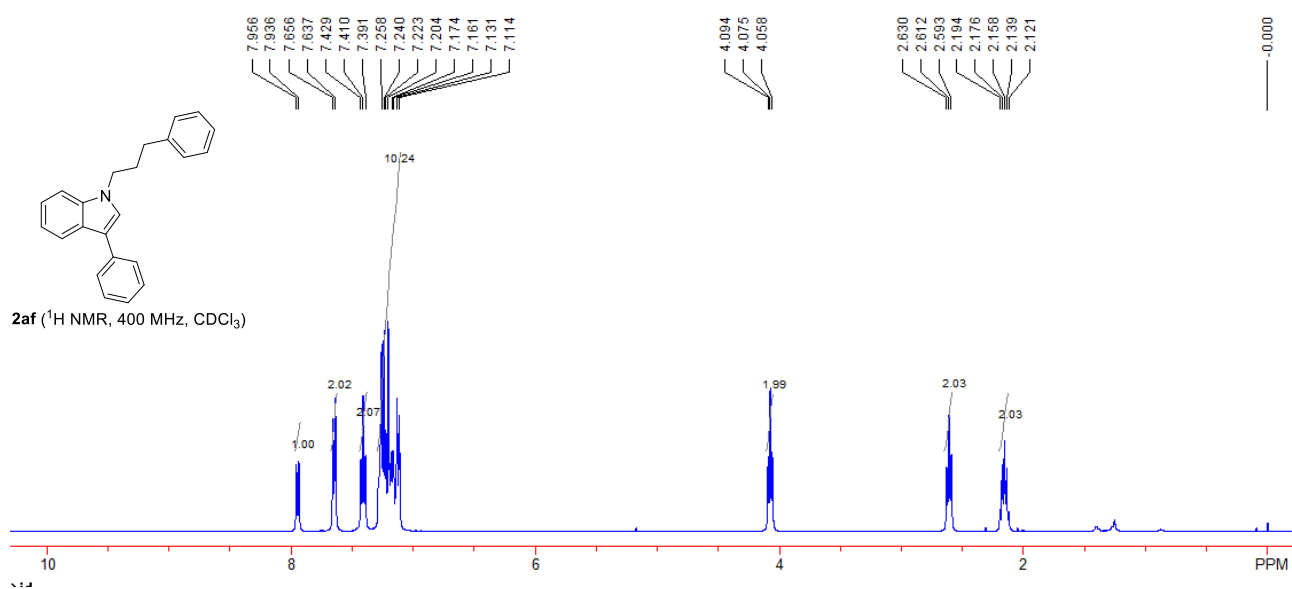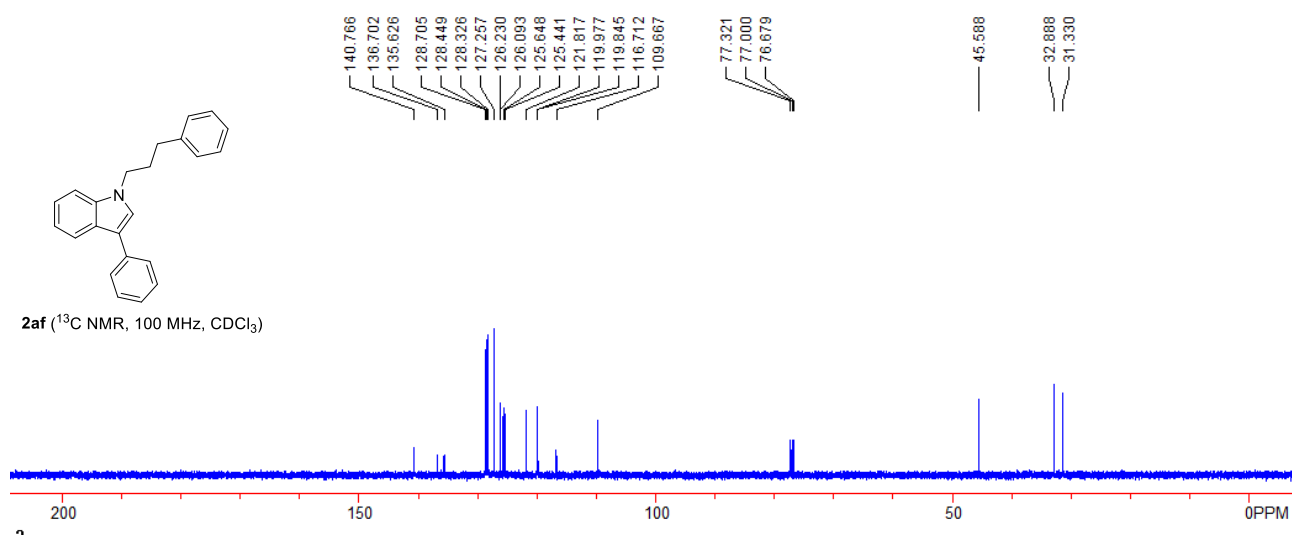

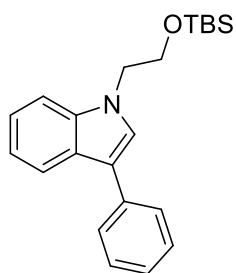

**Compound 2ah:** Yield: 27.0 mg, 77%; a yellow oil; Eluent: PE/EA = 20/1.  $^1\text{H}$  NMR (400 MHz,  $\text{CDCl}_3$ , TMS)  $\delta$  -0.13 (s, 6H), 0.83 (s, 9H), 3.93 (t,  $J$  = 5.6 Hz, 2H), 4.24 (t,  $J$  = 5.6 Hz, 2H), 7.13-7.20 (m, 1H), 7.21-7.29 (m, 2H), 7.31 (s, 1H), 7.36 (d,  $J$  = 7.6 Hz, 1H), 7.42 (t,  $J$  = 7.6 Hz, 2H), 7.65 (d,  $J$  = 7.2 Hz, 2H), 7.93 (d,  $J$  = 7.2 Hz, 1H);  $^{13}\text{C}\{^1\text{H}\}$ -NMR (101 MHz,  $\text{CDCl}_3$ , TMS)  $\delta_{\text{C}}$  -5.7, 18.2, 25.8, 48.7, 62.3, 109.6, 116.7, 119.8, 119.9, 121.8, 125.6, 126.3, 126.4, 127.3, 128.7, 135.8, 136.9; IR (neat):  $\nu$  2951, 2927, 2855, 1602, 1547, 1464, 1375, 1333, 1253, 1194, 1107, 936, 915, 829, 765, 736, 696  $\text{cm}^{-1}$ ; HRMS (ESI-TOF) Calcd for  $\text{C}_{22}\text{H}_{30}\text{NOSi}$   $[\text{M}+\text{H}]^+$ : 352.2091, found: 352.2088.

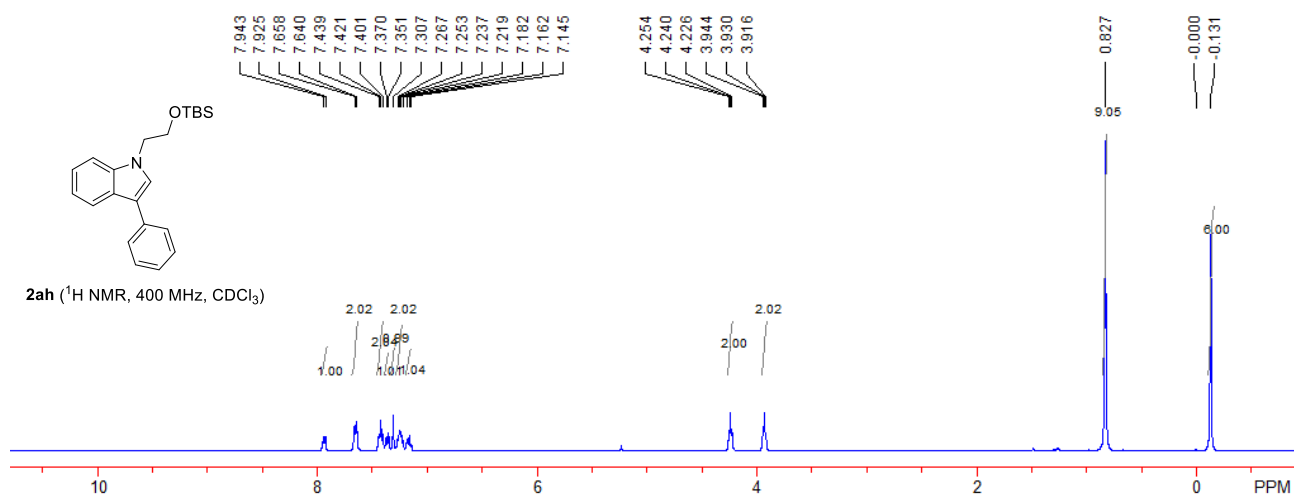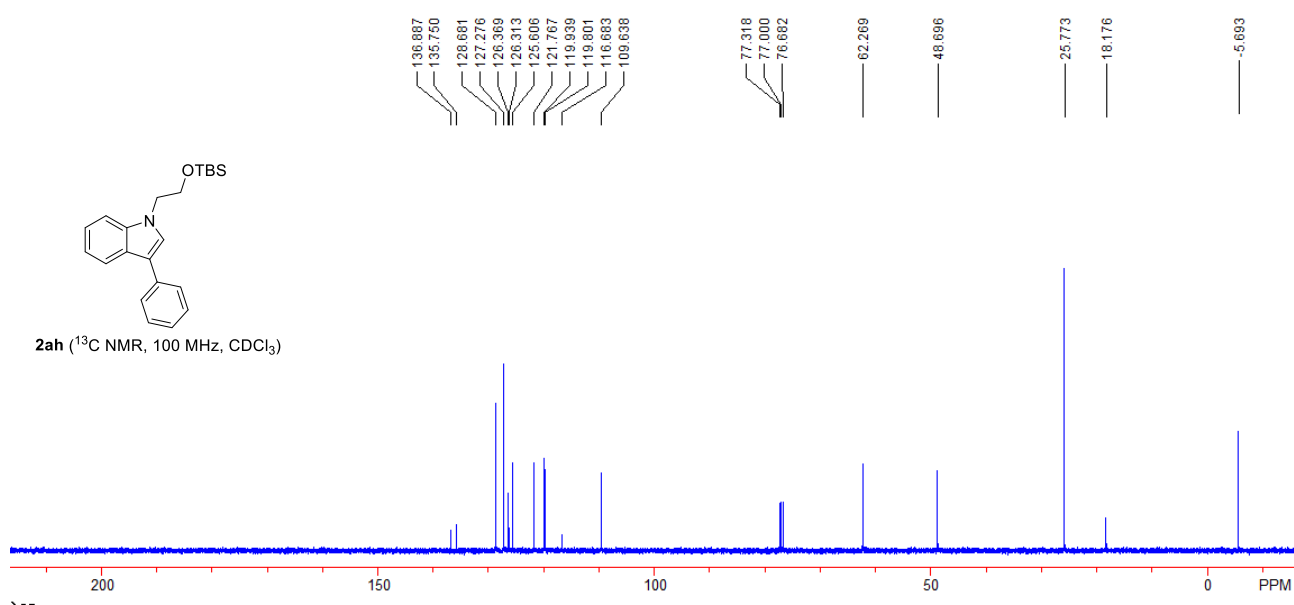

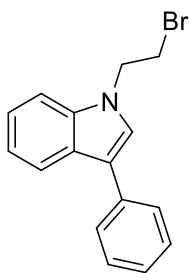

**Compound 2ai:** Yield: 9.6 mg, 32%; a light yellow solid; Mp: 80-82 °C; Eluent: PE/EA = 20/1.  $^1\text{H}$  NMR (400 MHz,  $\text{CDCl}_3$ , TMS)  $\delta$  3.58 (t,  $J = 6.8$  Hz, 2H), 4.45 (t,  $J = 6.8$  Hz, 2H), 7.15-7.35 (m, 5H), 7.42 (t,  $J = 7.2$  Hz, 2H), 7.63 (d,  $J = 7.6$  Hz, 2H), 7.94 (d,  $J = 8.0$  Hz, 1H);  $^{13}\text{C}\{^1\text{H}\}$ -NMR (101 MHz,  $\text{CDCl}_3$ , TMS)  $\delta_{\text{C}}$  29.6, 47.8, 109.2, 117.5, 120.2, 120.3, 122.3, 125.4, 126.0, 126.4, 127.4, 128.8, 135.1, 136.3; IR (neat):  $\nu$  3042, 2921, 2849, 1599, 1543, 1478, 1464, 1374, 1328, 1209, 1145, 1072, 1016, 983, 914, 764, 733, 694  $\text{cm}^{-1}$ ; HRMS (ESI-TOF) Calcd for  $\text{C}_{16}\text{H}_{15}\text{NBr}$   $[\text{M}+\text{H}]^+$ : 300.0382, found: 300.0382.

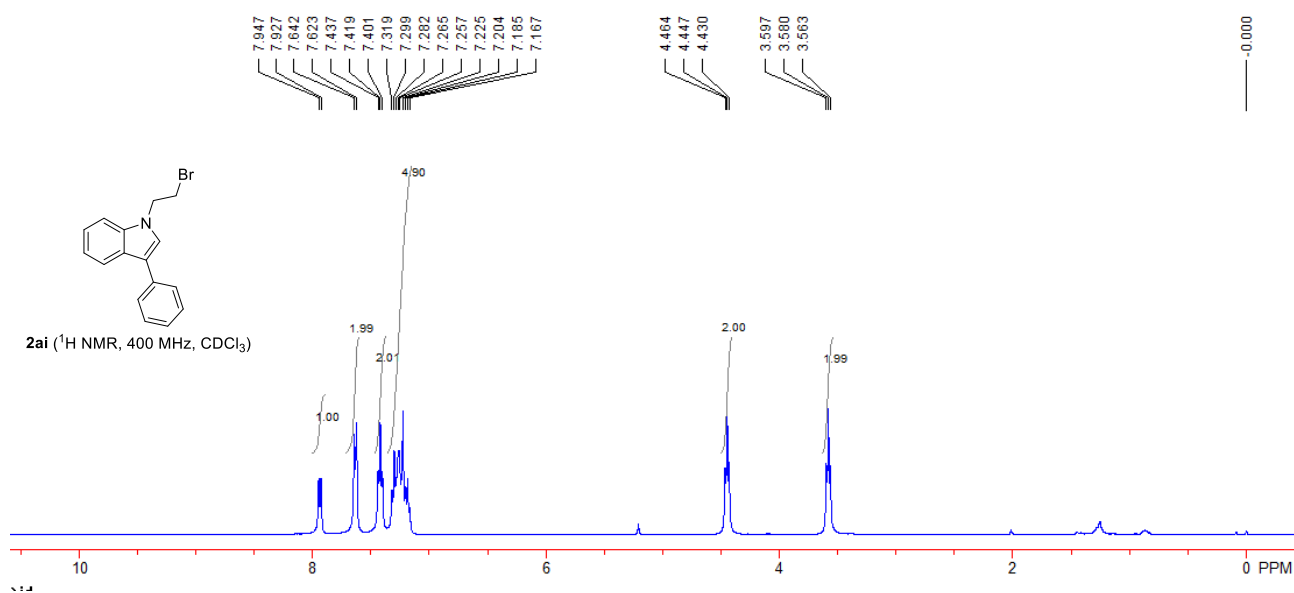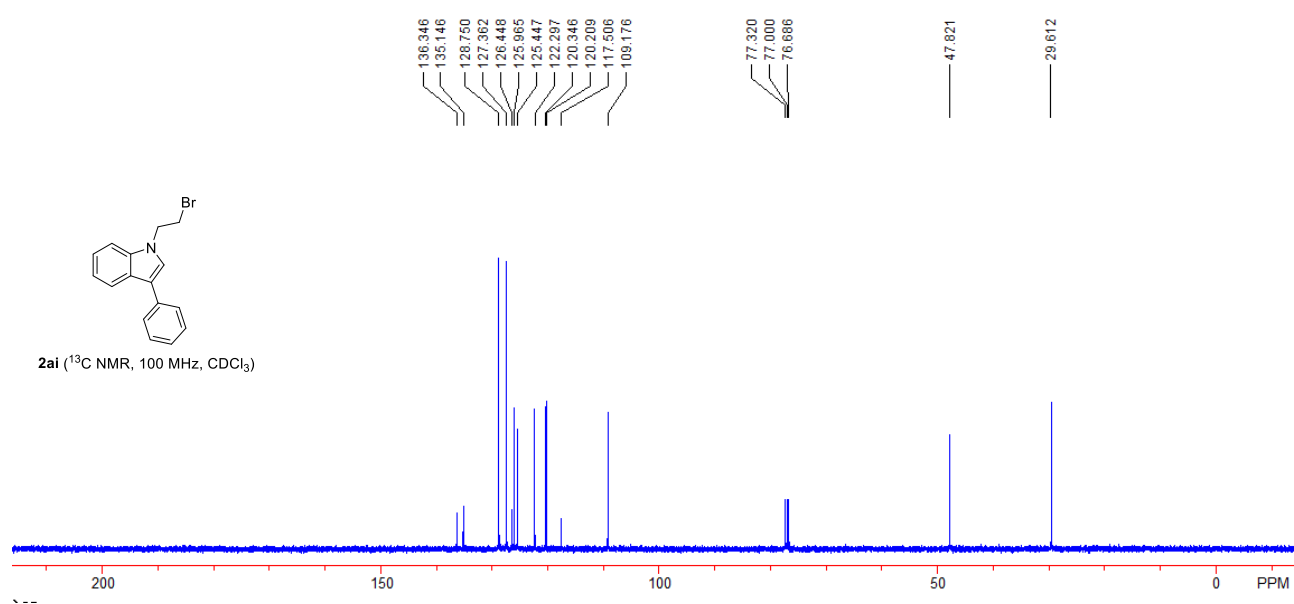

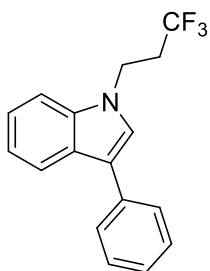

**Compound 2aj:** Yield: 16.2 mg, 56%; a light yellow solid; Mp: 46-48 °C; Eluent: PE/EA = 20/1.  $^1\text{H}$  NMR (400 MHz,  $\text{CDCl}_3$ , TMS)  $\delta$  2.45-2.65 (m, 2H), 4.29 (t,  $J = 7.6$  Hz, 2H), 7.12 (s, 1H), 7.15-7.21 (m, 1H), 7.22-7.30 (m, 3H), 7.40 (t,  $J = 7.6$  Hz, 2H), 7.61 (d,  $J = 7.6$  Hz, 2H), 7.93 (d,  $J = 8.0$  Hz, 1H);  $^{13}\text{C}\{^1\text{H}\}$ -NMR (101 MHz,  $\text{CDCl}_3$ , TMS)  $\delta_{\text{C}}$  34.3 (q,  $J = 28.3$  Hz), 39.4 (q,  $J = 4.1$  Hz), 109.0, 117.8, 120.3, 120.4, 122.4, 125.0, 125.7 (q,  $J = 275.7$  Hz), 126.0, 126.5, 127.3, 128.8, 135.1, 136.2;  $^{19}\text{F}$  NMR (376 MHz,  $\text{CDCl}_3$ )  $\delta$  -65.4; IR (neat):  $\nu$  3052, 2922, 1600, 1545, 1468, 1391, 1336, 1302, 1239, 1199, 1130, 1107, 1069, 988, 848, 764, 736, 696  $\text{cm}^{-1}$ ; HRMS (FI-TOF) Calcd for  $\text{C}_{17}\text{H}_{14}\text{NF}_3$   $[\text{M}]^+$ : 289.1073, found: 289.1077.

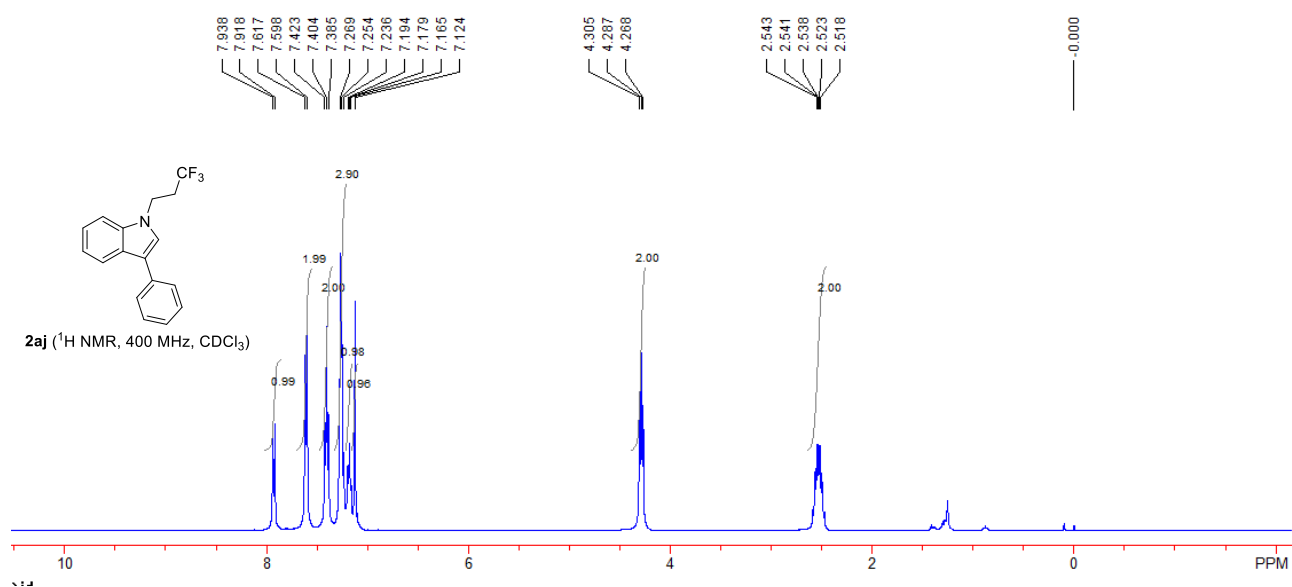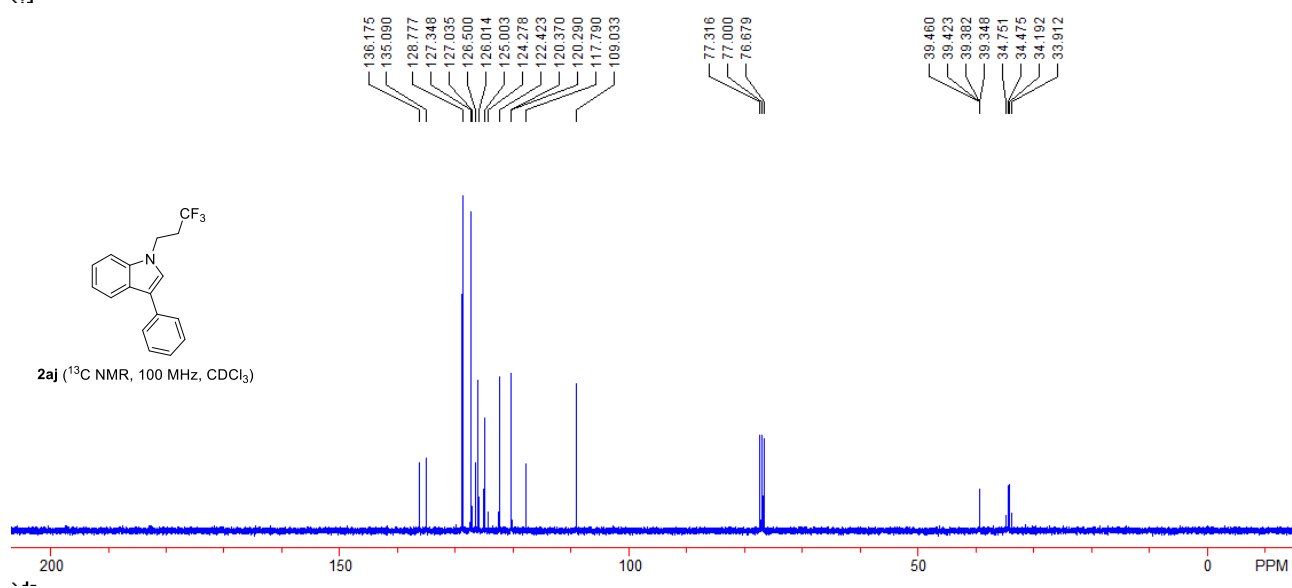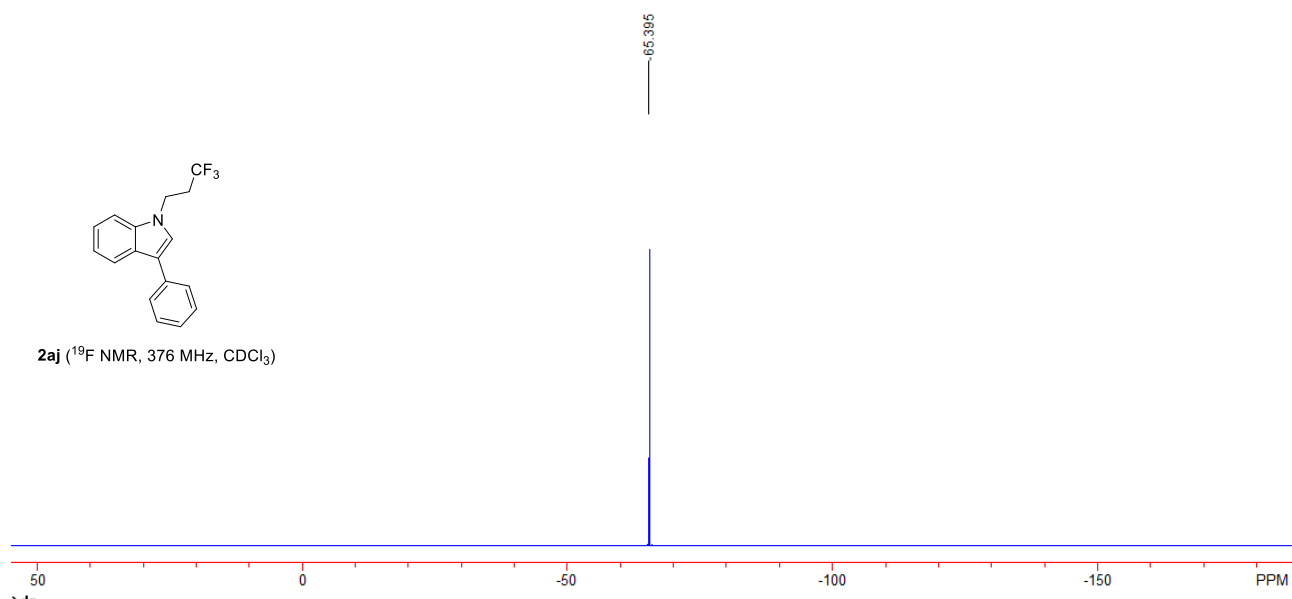

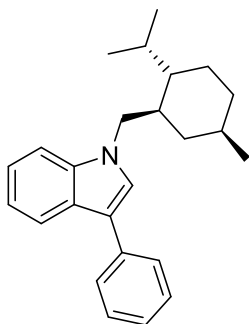

**Compound 2am:** Yield: 15.9 mg, 46%; a light yellow solid; Mp: 148-150 °C; Eluent: PE/EA = 20/1. <sup>1</sup>H NMR (400 MHz, CDCl<sub>3</sub>, TMS) 0.63 (q, *J* = 12.0 Hz, 1H), 0.74 (d, *J* = 6.4 Hz, 3H), 0.79-0.91 (m, 1H), 0.97 (d, *J* = 6.8 Hz, 3H), 1.01 (d, *J* = 6.8 Hz, 3H), 1.05-1.22 (m, 3H), 1.39 (d, *J* = 12.4 Hz, 1H), 1.66-1.76 (m, 2H), 1.83-1.96 (m, 1H), 2.14-2.22 (m, 1H), 3.58-3.67 (m, 1H), 4.52 (dd, *J*<sub>1</sub> = 14.0 Hz, *J*<sub>2</sub> = 3.6 Hz, 1H), 7.14-7.30 (m, 4H), 7.36 (d, *J* = 8.0 Hz, 1H), 7.44 (t, *J* = 8.0 Hz, 2H), 7.68 (d, *J* = 7.2 Hz, 2H), 7.96 (d, *J* = 8.0 Hz, 1H); <sup>13</sup>C{<sup>1</sup>H}-NMR (101MHz, CDCl<sub>3</sub>, TMS) δ<sub>C</sub> 15.6, 21.5, 22.5, 24.1, 26.9, 32.0, 34.9, 39.43, 39.45, 46.2, 50.1, 109.8, 116.3, 119.7, 119.9, 121.7, 125.6, 126.1, 126.6, 127.2, 128.7, 135.7, 137.0; IR (neat): ν 2953, 2916, 2839, 1599, 1545, 1478, 1394, 1260, 1141, 1070, 1001, 921, 821, 735, 696 cm<sup>-1</sup>; HRMS (ESI-TOF) Calcd for C<sub>25</sub>H<sub>32</sub>N [M+H]<sup>+</sup>: 346.2529, found: 346.2535.

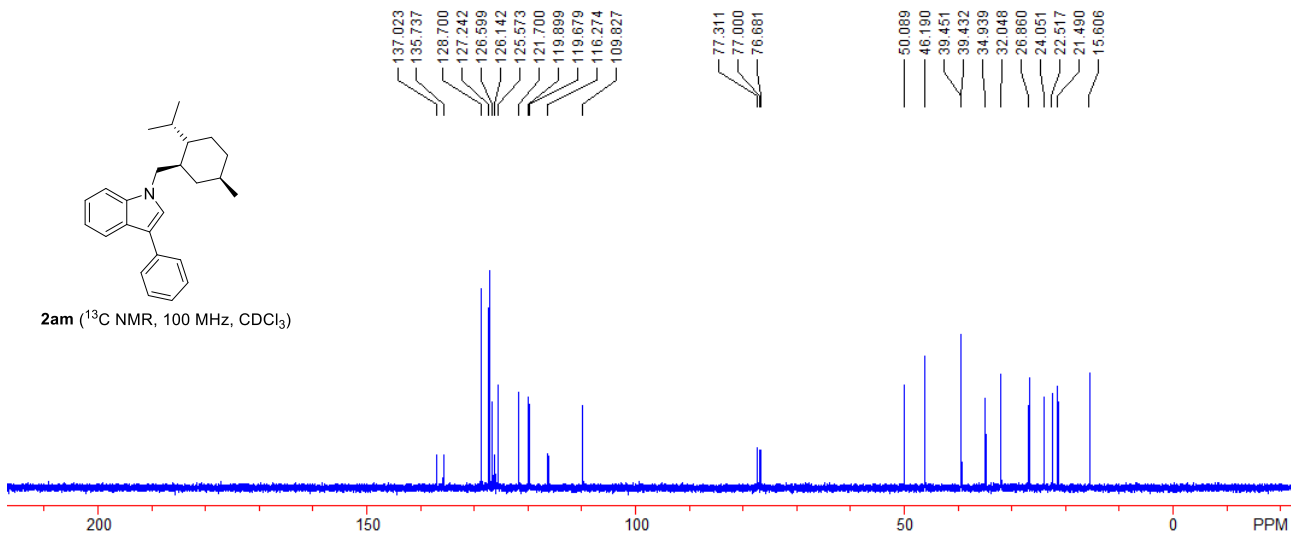

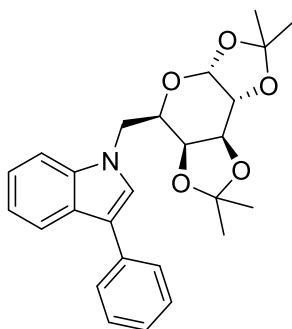

**Compound 2an:** Yield: 32.6 mg, 75%; a light yellow solid; Mp: 109-111 °C; Eluent: PE/EA = 10/1.  $^1\text{H}$  NMR (400 MHz,  $\text{CDCl}_3$ , TMS)  $\delta$  1.29 (s, 3H), 1.34 (s, 3H), 1.42 (s, 3H), 1.55 (s, 3H), 4.00 (d,  $J$  = 8.0 Hz, 1H), 4.17-4.50 (m, 4H), 4.53 (d,  $J$  = 7.6 Hz, 1H), 5.56 (d,  $J$  = 4.8 Hz, 1H), 7.17 (t,  $J$  = 7.2 Hz, 1H), 7.26 (t,  $J$  = 7.2 Hz, 2H), 7.40-7.48 (m, 4H), 7.66 (d,  $J$  = 7.2 Hz, 2H), 7.94 (d,  $J$  = 7.6 Hz, 1H);  $^{13}\text{C}\{^1\text{H}\}$ -NMR (101 MHz,  $\text{CDCl}_3$ , TMS)  $\delta_{\text{C}}$  24.4, 24.8, 25.97, 26.01, 45.8, 65.9, 70.46, 70.56, 96.4, 108.7, 109.4, 109.6, 117.0, 119.96, 120.02, 122.0, 125.7, 126.3, 127.3, 128.7, 135.6, 137.0; IR (neat):  $\nu$  2988, 2918, 2849, 1644, 1601, 1546, 1468, 1395, 1334, 1252, 1165, 1037, 999, 917, 885, 765, 699  $\text{cm}^{-1}$ ; HRMS (ESI-TOF) Calcd for  $\text{C}_{26}\text{H}_{30}\text{NO}_5$   $[\text{M}+\text{H}]^+$ : 436.2119, found: 436.2120.

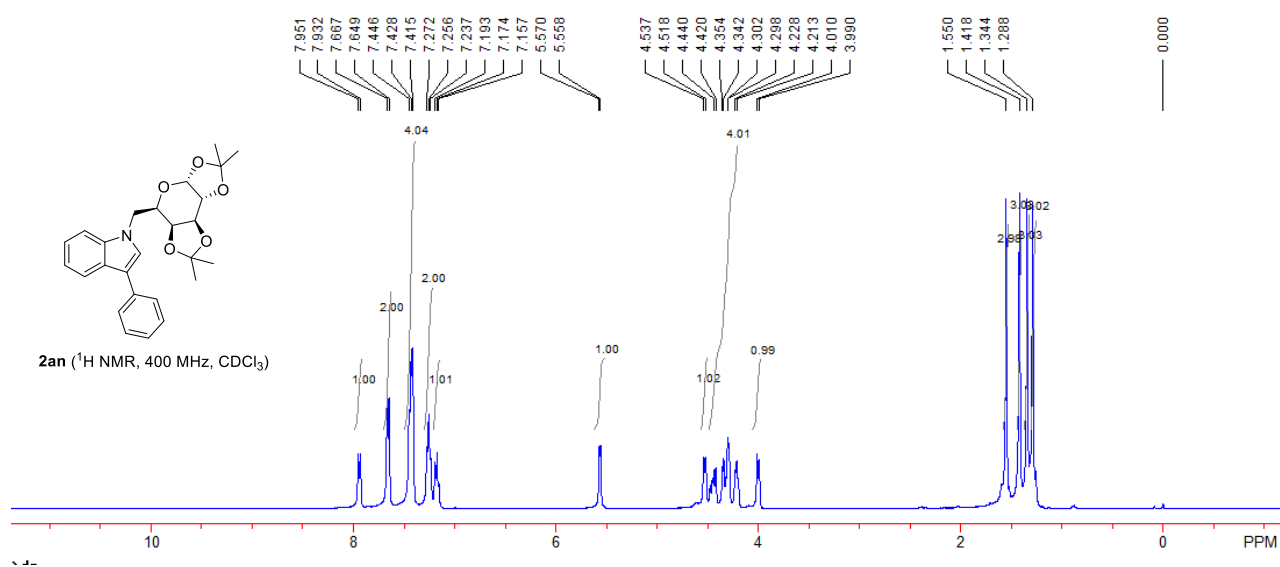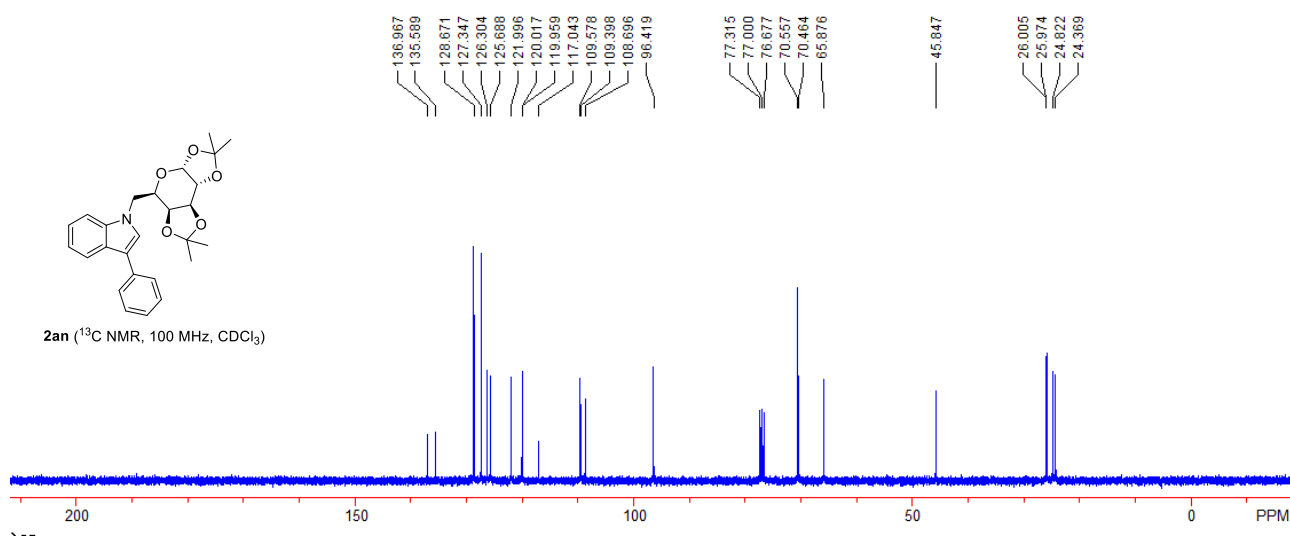

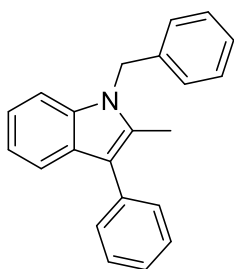

**Compound 2ao:**<sup>16</sup> Yield: 12.8 mg, 43%; a yellow oil; Eluent: PE/EA = 20/1. <sup>1</sup>H NMR (400 MHz, CDCl<sub>3</sub>, TMS)  $\delta$  2.41 (s, 3H), 5.35 (s, 2H), 7.02 (d,  $J$  = 7.2 Hz, 2H), 7.08-7.20 (m, 2H), 7.21-7.33 (m, 5H), 7.45 (t,  $J$  = 7.6 Hz, 2H), 7.52 (d,  $J$  = 6.8 Hz, 2H), 7.71 (d,  $J$  = 7.2 Hz, 1H); <sup>13</sup>C{<sup>1</sup>H}-NMR (101 MHz, CDCl<sub>3</sub>, TMS)  $\delta$ <sub>C</sub> 11.0, 46.6, 109.2, 114.6, 118.8, 119.9, 121.4, 125.8, 126.0, 127.2, 127.3, 128.4, 128.8, 129.7, 133.2, 135.6, 136.5, 137.7.

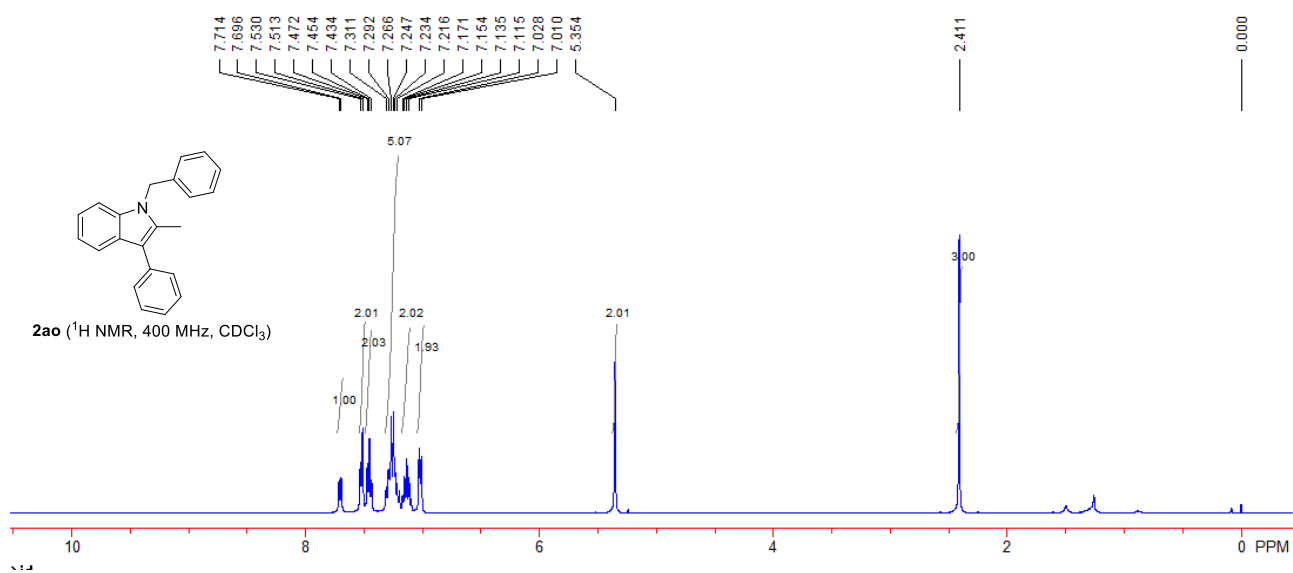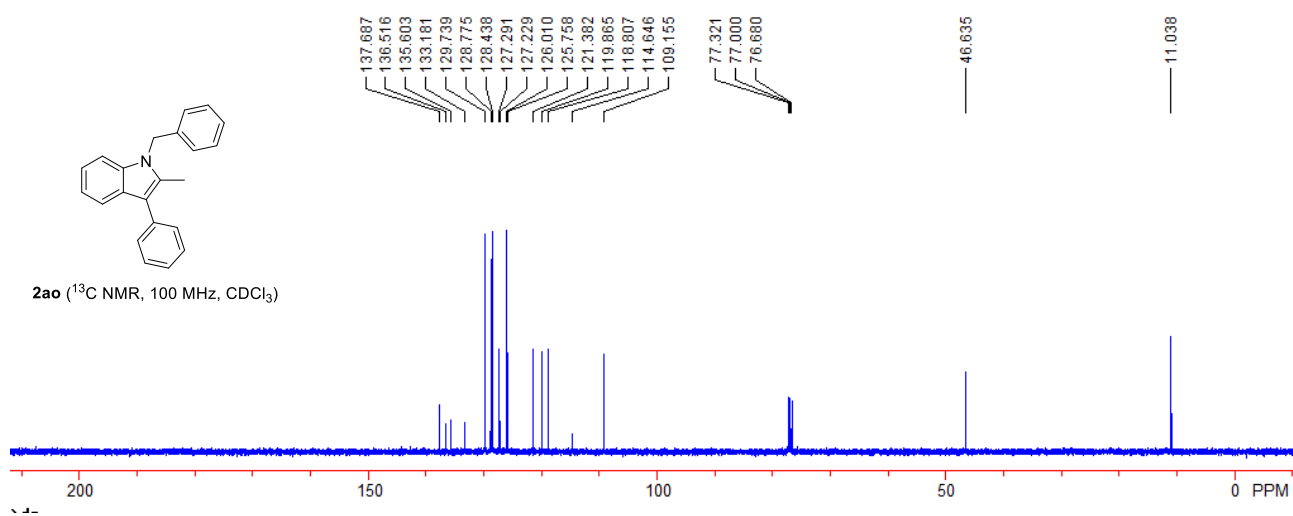

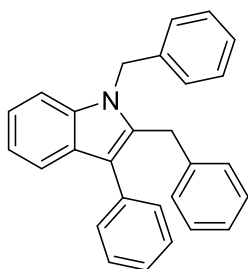

**Compound 2ap:** Yield: 7.8 mg, 21%; a light yellow solid; Mp: 131-133 °C; Eluent: PE/EA = 20/1.  $^1\text{H}$  NMR (400 MHz,  $\text{CDCl}_3$ , TMS)  $\delta$  4.15 (s, 2H), 5.09 (s, 2H), 6.84-6.92 (m, 2H), 7.03-7.10 (m, 2H), 7.12-7.30 (m, 10H), 7.34-7.43 (m, 2H), 7.50-7.58 (m, 2H), 7.74-7.81 (m, 1H);  $^{13}\text{C}\{^1\text{H}\}$ -NMR (101 MHz,  $\text{CDCl}_3$ , TMS)  $\delta_{\text{C}}$  30.8, 46.7, 109.5, 116.7, 119.4, 120.0, 121.9, 125.9, 126.1, 126.4, 127.2, 127.3, 127.9, 128.6, 128.7, 129.4, 134.4, 135.2, 136.9, 137.7, 138.9; IR (neat):  $\nu$  3024, 2915, 1600, 1555, 1494, 1431, 1407, 1306, 1205, 1093, 1001, 936, 874, 772, 716  $\text{cm}^{-1}$ ; HRMS (EI-TOF) Calcd for  $\text{C}_{28}\text{H}_{23}\text{N}$   $[\text{M}]^+$ : 373.1825, found: 373.1840.

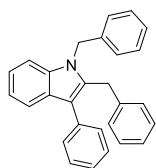

**2ap** ( $^1\text{H}$  NMR, 400 MHz,  $\text{CDCl}_3$ )

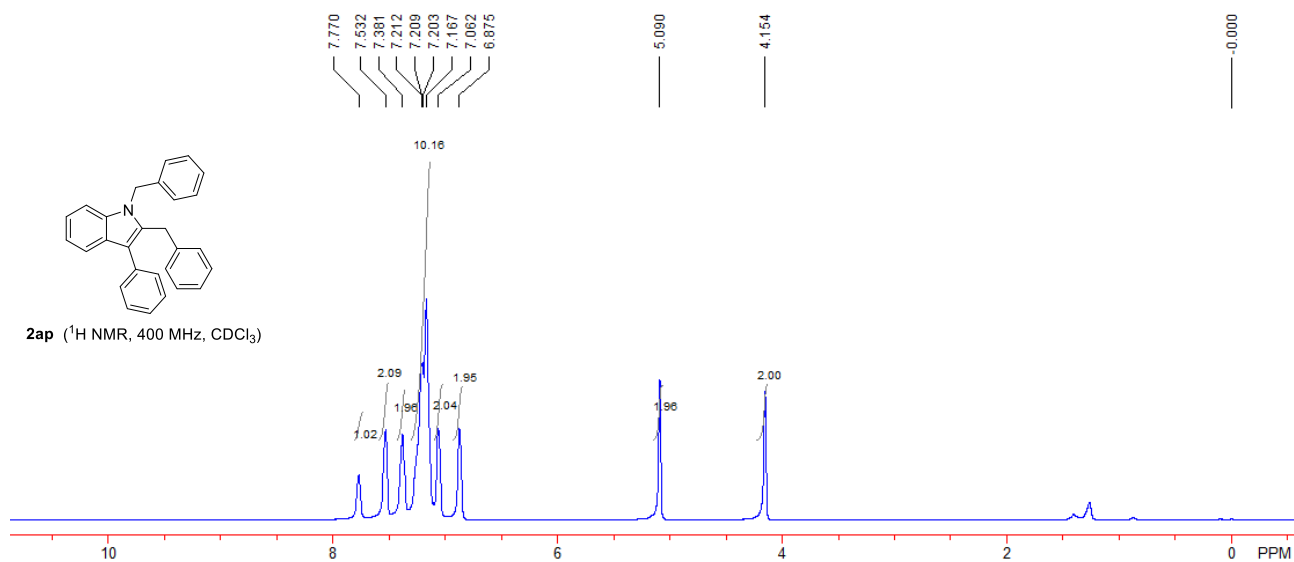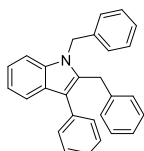

**2ap** ( $^{13}\text{C}$  NMR, 100 MHz,  $\text{CDCl}_3$ )

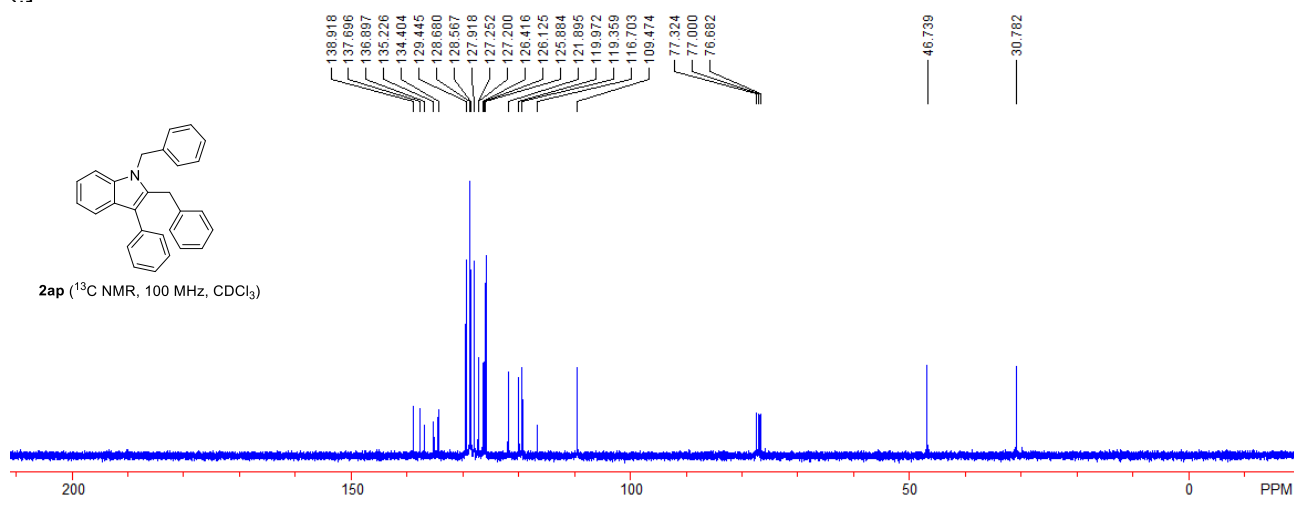

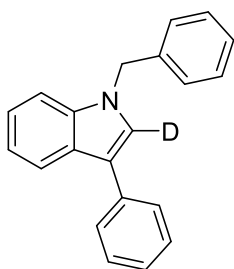

**Compound [D]-2a:** Yield: 23.6 mg, 83%, D containing 93%; a light yellow solid; Mp: 65-67 °C; Eluent: PE/EA = 20/1.  $^1\text{H}$  NMR (400 MHz,  $\text{CDCl}_3$ , TMS)  $\delta$  5.21 (s, 2H), 7.08 (d,  $J$  = 6.8 Hz, 2H), 7.13-7.29 (m, 7H), 7.39 (t,  $J$  = 7.6 Hz, 2H), 7.64 (d,  $J$  = 7.6 Hz, 2H), 7.96 (d,  $J$  = 6.8 Hz, 1H);  $^{13}\text{C}\{^1\text{H}\}$ -NMR (101 MHz,  $\text{CDCl}_3$ , TMS)  $\delta_{\text{C}}$  49.9, 110.0, 117.1, 120.0, 120.1, 122.1, 125.7, 126.4, 126.8, 127.3, 127.6, 128.70, 128.73, 135.5, 137.0, 137.1; IR (neat):  $\nu$  3028, 2922, 1598, 1520, 1464, 1385, 1297, 1069, 940, 890, 770, 749, 727, 694  $\text{cm}^{-1}$ ; HRMS (DART-LTQFTICR) Calcd for  $\text{C}_{21}\text{H}_{17}\text{DN}$   $[\text{M}+\text{H}]^+$ : 285.1497, found: 285.1495.

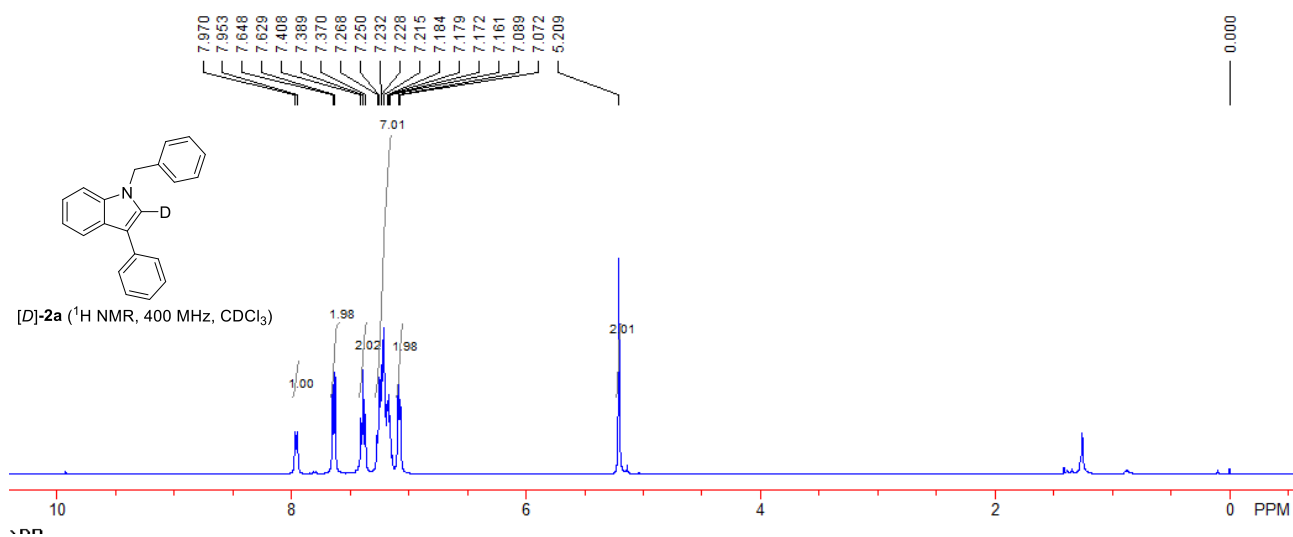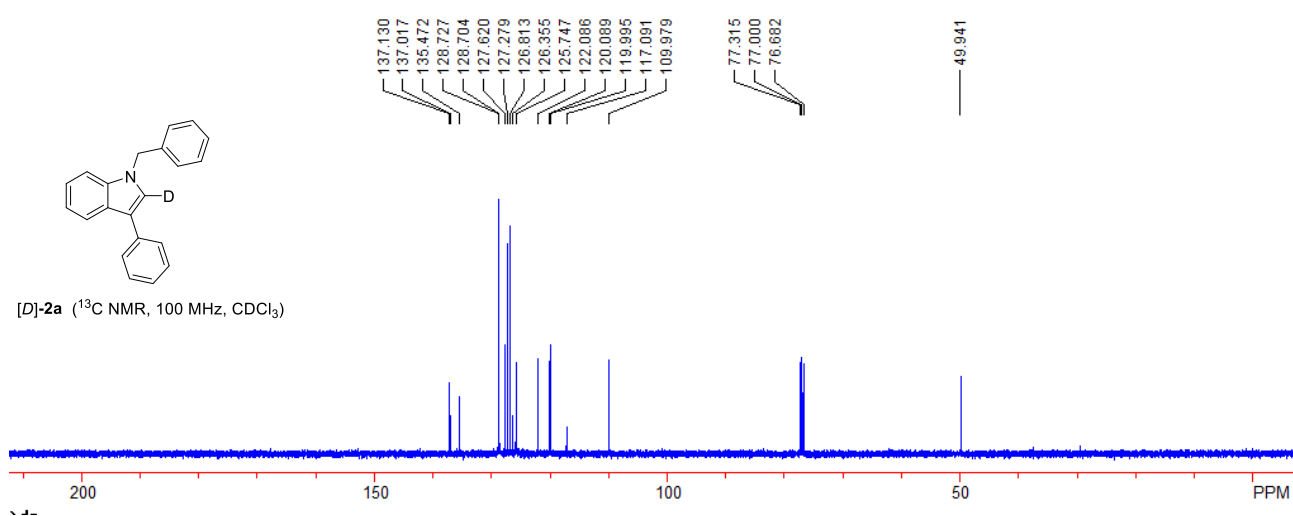

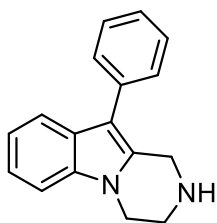

**Compound 11a:** Yield: 37.7 mg, 76%; a light yellow solid; Mp: 98-100 °C; Eluent: PE/EA = 2/1. <sup>1</sup>H NMR (400 MHz, CDCl<sub>3</sub>, TMS) δ 7.76 (d, *J* = 7.8 Hz, 1H), 7.48–7.39 (m, 4H), 7.32–7.25 (m, 2H), 7.22–7.13 (m, 2H), 4.11 (t, *J* = 5.6 Hz, 2H), 4.01 (s, 2H), 3.36 (s, 1H), 3.15 (t, *J* = 5.6 Hz, 2H); <sup>13</sup>C{<sup>1</sup>H}-NMR (101 MHz, CDCl<sub>3</sub>, TMS) δ<sub>C</sub> 136.1, 135.0, 130.9, 128.8, 128.6, 126.9, 125.7, 121.3, 120.4, 119.1, 111.6, 108.8, 49.5, 48.2, 41.9; IR (neat): ν 3668, 3397, 2970, 1602, 1455, 1320, 1260, 1074, 747, 701 cm<sup>-1</sup>; HRMS (ESI-TOF) Calcd for C<sub>17</sub>H<sub>17</sub>N<sub>2</sub> [M+H]<sup>+</sup>: 249.1386, found: 249.1389.

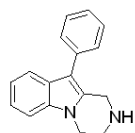

**11a** ( $^1\text{H}$  NMR, 400 MHz,  $\text{CDCl}_3$ )

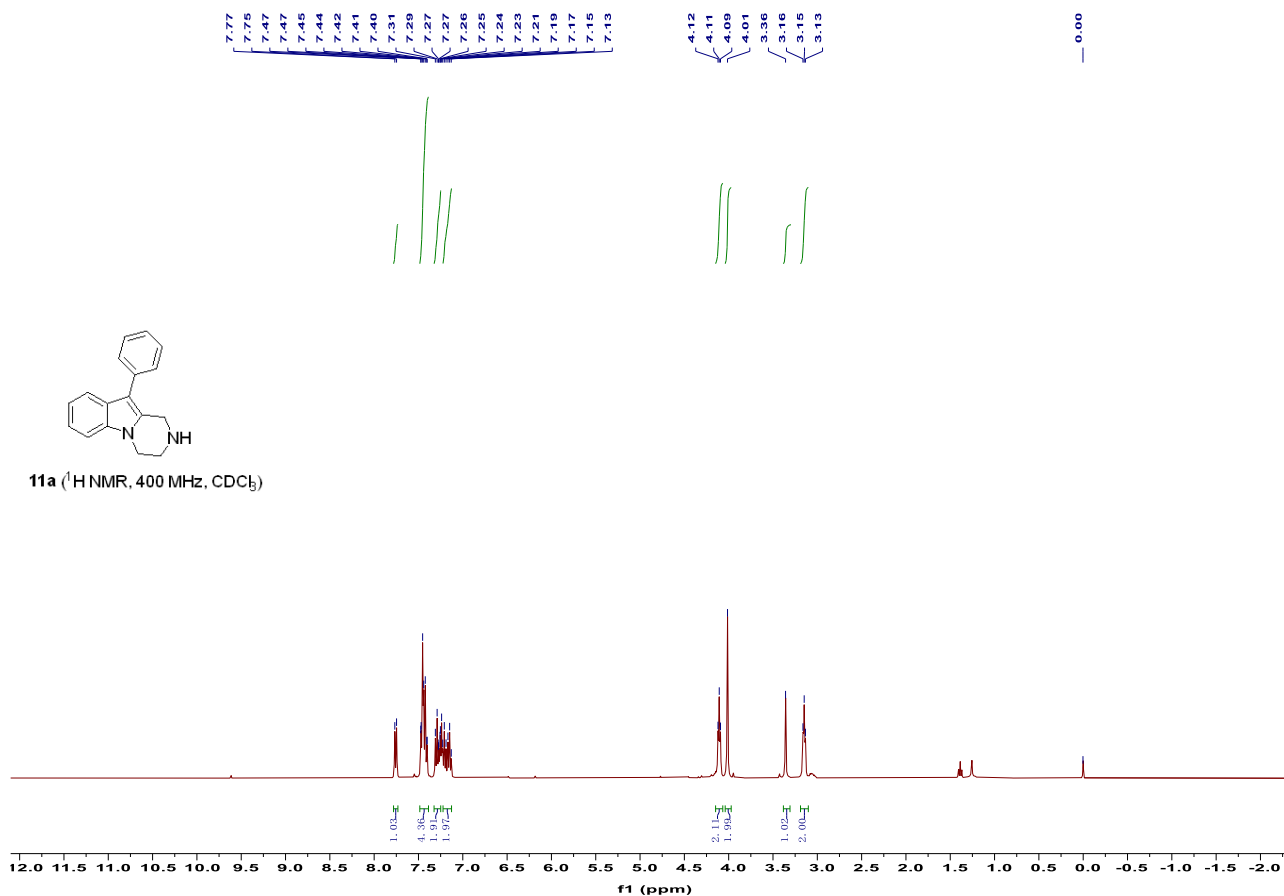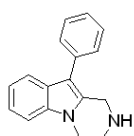

**11a** ( $^{13}\text{C}$  NMR, 101 MHz,  $\text{CDCl}_3$ )

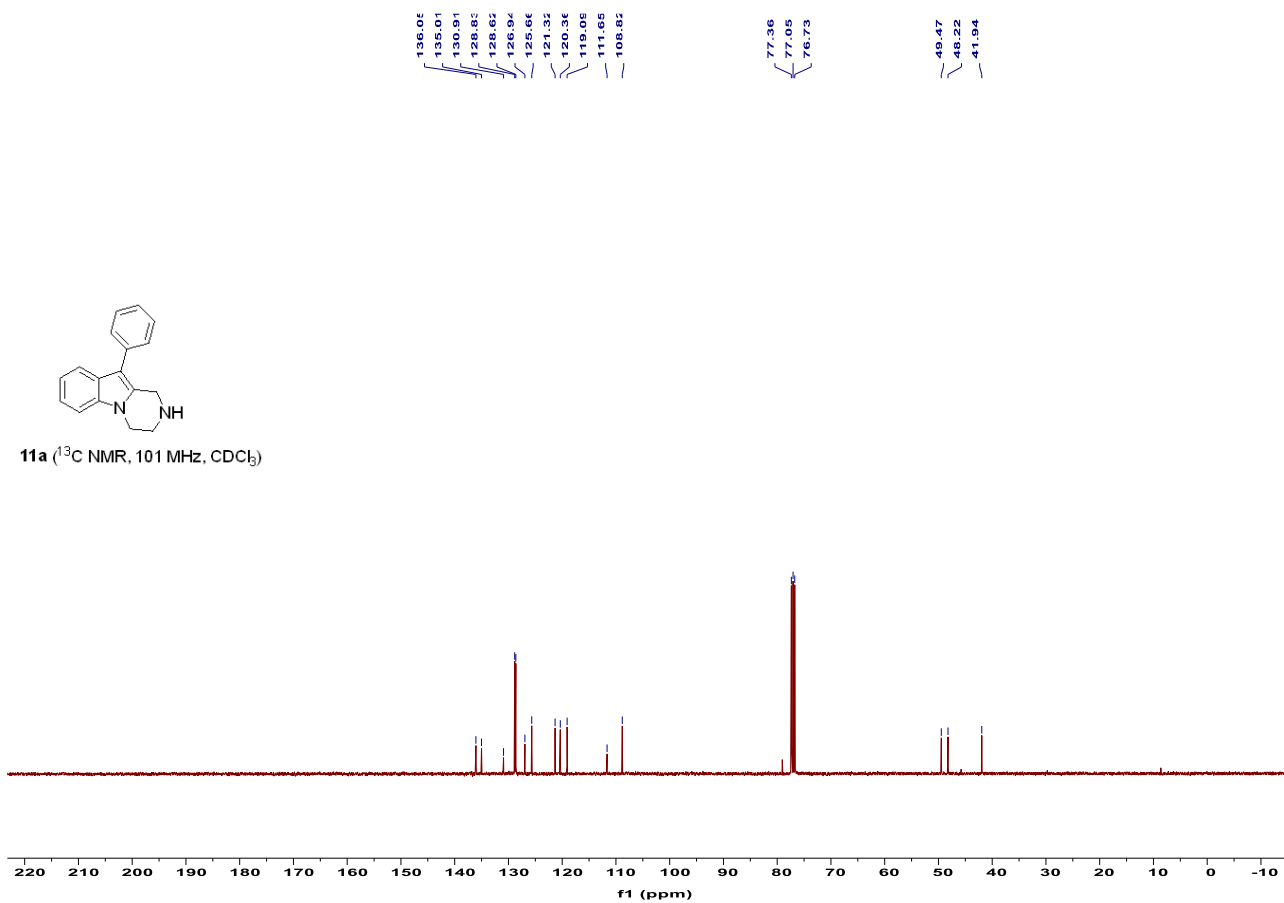

## 10. Computational details

All quantum mechanical calculations have been performed with Gaussian 16. The geometries of all species have been optimized at B3LYP/6-31G(d) level. The subsequent frequency calculations on the stationary points were carried out at the same level of theory to ascertain the nature of the stationary points as minima on the respective potential energy surfaces. The conformational space of flexible systems has first been searched manually and checked by xtb 6.0 program.<sup>17</sup> Thermochemical corrections to 298.15 K have been calculated for all minima from unscaled vibrational frequencies obtained at this same level. The thermochemical corrections have been combined with single-point energies calculated at the SMD/B3LYP/6-311+G(d,p)//B3LYP/6-31G(d) level to yield free energy  $G_{298}$  at 298.15 K. The solvent effect was estimated by the IEFPCM method with radii and nonelectrostatic terms for SMD salvation model in acetonitrile ( $\epsilon = 35.688$ ).

The Gibbs activation energy of SET process is obtained based on Marcus-Hush theory.<sup>18</sup>

Table S4. The total energies, enthalpies and free energies of all species in acetonitrile shown in Scheme 7a.

|                       | $E_{\text{tot}}$ | $H_{298}$    | $G_{298}$    |
|-----------------------|------------------|--------------|--------------|
| <b>1a</b>             | -1685.724311     | -1685.23542  | -1685.327013 |
| <b>1a<sup>+</sup></b> | -1685.517362     | -1685.02848  | -1685.120565 |
| <b>TS1</b>            | -1685.508294     | -1685.0199   | -1685.109127 |
| <b>INT1</b>           | -1685.539571     | -1685.04901  | -1685.138892 |
| <b>INT2</b>           | -1685.767508     | -1685.767508 | -1685.767508 |
| <b>TS2</b>            | -1685.75244      | -1685.26924  | -1685.361068 |
| <b>TsH</b>            | -820.2882496     | -820.139865  | -820.1866468 |
| <b>2a</b>             | -865.4799819     | -865.141256  | -865.2064329 |
| <b>PC<sup>•</sup></b> | -1875.859578     | -1875.13736  | -1875.260156 |
| <b>PC</b>             | -1875.727313     | -1875.00228  | -1875.121490 |
| <b>1n<sup>+</sup></b> | -2022.665044     | -2022.16788  | -2022.270353 |
| <b>TS1-1n</b>         | -2022.654569     | -2022.1579   | -2022.257285 |
| <b>1q<sup>+</sup></b> | -1800.085154     | -1799.56066  | -1799.658583 |
| <b>TS1-1q</b>         | -1800.071513     | -1799.54742  | -1799.642378 |

### Archive entries

#### 1a

```
1\1\GINC-OMC-1-819\SP\RB3LYP\6-311+G(d,p)\C28H25N1O2S1\SHIMGRP\04-Dec-2021\0\#\p scrf=(iefpcm,smd,solvent=acetonitrile) b3lyp/6-311+G(d,p)\YL-freq\0,1\C,0,-2.068524,3.786283,0.624296\C,0,-0.762822,3.855009,0.132837\C,0,0.16732,2.872569,0.469294\C,0,-0.188804,1.799978,1.305598\C,0,-1.514623,1.722612,1.762232\C,0,-2.440373,2.712946,1.435976\H,0,-2.790307,4.558672,0.371339\H,0,-0.466946,4.676122,-0.515339\H,0,1.177588,2.920314,0.07379\H,0,-1.815444,0.892124,2.39403\H,0,-3.454775,2.646908,1.821594\C,0,0.837106,0.823547,1.765384\C,0,0.457745,-0.614601,1.964
```

343\C,0,0.124859,-1.038681,3.261068\C,0,0.471078,-1.57531,0.930607\C,0  
 ,-0.201359,-2.36527,3.538131\H,0,0.131934,-0.303511,4.060863\C,0,0.174  
 405,-2.91615,1.221084\C,0,-0.175982,-3.308022,2.511935\H,0,-0.459002,-  
 2.660117,4.551821\H,0,0.214273,-3.646022,0.420368\H,0,-0.411746,-4.349  
 494,2.713236\C,0,2.066574,1.22924,2.114748\H,0,2.818082,0.528119,2.462  
 256\H,0,2.361323,2.272849,2.055467\N,0,0.878351,-1.182156,-0.405442\C,  
 0,2.308655,-1.491009,-0.751842\H,0,2.679013,-2.224324,-0.028949\H,0,2.  
 329956,-1.977913,-1.732109\C,0,3.223106,-0.284172,-0.785994\C,0,4.4122  
 52,-0.288229,-0.050046\C,0,2.938127,0.815595,-1.606863\C,0,5.299709,0.  
 788859,-0.117434\H,0,4.648203,-1.141353,0.583126\C,0,3.820382,1.893303  
 ,-1.672119\H,0,2.026521,0.8123,-2.196148\C,0,5.003144,1.885311,-0.9262  
 94\H,0,6.218456,0.76972,0.46318\H,0,3.590545,2.738754,-2.315978\H,0,5.  
 690177,2.725728,-0.981754\S,0,-0.169555,-1.617203,-1.705986\O,0,0.3886  
 62,-0.929171,-2.877889\O,0,-0.371963,-3.074914,-1.772774\C,0,-1.740455  
 ,-0.869129,-1.296375\C,0,-2.001778,0.431964,-1.732043\C,0,-2.727111,-1.  
 633198,-0.672874\C,0,-3.266945,0.970684,-1.524445\H,0,-1.229991,1.000  
 137,-2.238153\C,0,-3.985435,-1.070672,-0.464125\H,0,-2.517652,-2.65466  
 ,-0.377061\C,0,-4.275297,0.233095,-0.885594\H,0,-3.474837,1.982138,-1.  
 862611\H,0,-4.758498,-1.661555,0.020603\C,0,-5.637565,0.841912,-0.6554  
 54\H,0,-6.356219,0.098062,-0.298505\H,0,-5.587182,1.643602,0.09267\H,0  
 ,-6.036979,1.285645,-1.574735\\Version=ES64L-G16RevA.03\State=1-A\HF=-  
 1685.7243107\RMSD=1.224e-09\Dipole=-1.3117081,1.0382005,2.1689965\Quad  
 rupole=17.0078131,-1.6619372,-15.3458759,-2.8060782,2.3483826,-16.5859  
 383\PG=C01 [X(C28H25N1O2S1)]\@

## 1a<sup>+</sup>

1\1\GINC-OMC-1-811\SP\UB3LYP\6-311+G(d,p)\C28H25N1O2S1(1+,2)\SHIMGRP\2  
 3-Nov-2021\0\#p b3lyp/6-311+G(d,p) scrf=(iefpcm,smd,solvent=acetonitr  
 ile)\LQZ-TS1\1,2\C,0,5.022707,-2.077492,0.119901\C,0,5.25478,-3.2543  
 47,0.836701\C,0,4.17569,-3.9872,1.343036\C,0,2.873955,-3.543126,1.1424  
 1\C,0,2.621524,-2.352095,0.429465\C,0,3.720283,-1.634735,-0.08996\C,0,  
 1.243394,-1.847441,0.253954\C,0,0.891819,-1.133752,-0.993654\C,0,0.273  
 072,-2.079859,1.180647\C,0,1.277256,-1.678341,-2.231188\C,0,0.800996,-  
 1.155926,-3.425693\C,0,-0.053094,-0.039591,-3.413441\C,0,-0.420557,0.5  
 54339,-2.217904\C,0,0.064427,0.042525,-0.992428\N,0,-0.208226,0.687102  
 ,0.219597\C,0,0.89946,1.194994,1.10098\S,0,-1.820642,1.456641,0.537666  
 \C,0,1.323178,2.58334,0.674386\C,0,0.903644,3.71122,1.398606\C,0,1.335  
 477,4.98286,1.027113\C,0,2.173797,5.142891,-0.078944\C,0,2.587734,4.02  
 5204,-0.813056\C,0,2.159947,2.754662,-0.441817\O,0,-1.710854,1.831541,  
 1.943383\O,0,-2.071647,2.438044,-0.512892\C,0,-2.952378,0.096623,0.376  
 14\C,0,-3.202774,-0.706454,1.495856\C,0,-4.134137,-1.734108,1.386905\C  
 ,0,-4.826919,-1.966343,0.186849\C,0,-4.561373,-1.133597,-0.91183\C,0,-  
 3.634306,-0.098643,-0.828925\C,0,-5.862869,-3.057253,0.094629\H,0,5.85  
 7368,-1.504223,-0.272017\H,0,6.270809,-3.602665,0.99629\H,0,4.352296,-  
 4.910441,1.886411\H,0,2.042931,-4.135363,1.512758\H,0,3.551597,-0.7155

1,-0.643216\H,0,-0.760422,-1.807911,1.006944\H,0,0.497551,-2.590397,2.111716\H,0,1.913171,-2.556979,-2.238701\H,0,1.08128,-1.616622,-4.367833\H,0,-0.399468,0.388493,-4.349228\H,0,-1.010111,1.461881,-2.215346\H,0,0.535348,1.181015,2.126856\H,0,1.718173,0.481514,1.014747\H,0,0.244681,3.58746,2.252107\H,0,1.017286,5.848625,1.599817\H,0,2.503758,6.135352,-0.371561\H,0,3.245246,4.148694,-1.668456\H,0,2.488144,1.889151,-1.013086\H,0,-2.698672,-0.509605,2.436187\H,0,-4.340395,-2.357045,2.252848\H,0,-5.099343,-1.288896,-1.842826\H,0,-3.462304,0.55937,-1.672857\H,0,-5.629279,-3.891616,0.762715\H,0,-6.849598,-2.673345,0.384637\H,0,-5.950591,-3.443724,-0.9251\\Version=ES64L-G16RevA.03\State=2-A\HF=-1685.517362\S2=0.761802\S2-1=0.\S2A=0.750098\RMSD=2.052e-09\Dipole=0.600297,-3.4886729,-1.1767134\Quadrupole=13.4625597,-6.6924137,-6.7701459,9.1252655,-0.9079049,-6.6914338\PG=C01 [X(C28H25N1O2S1)]\@

# TS1

1\1\GINC-OMC-1-801\SP\UB3LYP\6-311+G(d,p)\C28H25N1O2S1(1+,2)\SHIMGRP\23-Nov-2021\0\\#p b3lyp/6-311+G(d,p) scrf=(iefpcm,smd,solvent=acetonitrile)\Tilte Card Required\\1,2\C\C,1,1.39960322\C,2,1.40047154,1,120.03663439\C,3,1.38705101,2,120.07884049,1,0.0123483,0\C,4,1.41884812,3,120.84249689,2,-0.17811761,0\C,1,1.38829325,2,120.23820671,3,-0.08516855,0\C,5,1.44815785,4,120.12224872,3,-179.73118389,0\C,7,1.46437628,5,124.42956725,4,-165.89685623,0\C,7,1.41080159,5,123.33570972,4,25.75950864,0\C,8,1.4017232,7,127.28007022,5,41.070046,0\C,10,1.39369726,8,119.72182123,7,-177.68363516,0\C,11,1.39766923,10,120.25363448,8,1.79089449,0\C,12,1.39982694,11,121.05629676,10,-0.84739851,0\C,13,1.3930719,12,118.69316505,11,-1.35038744,0\N,14,1.45289793,13,124.7589509,12,178.50476093,0\C,15,1.52801336,14,115.75641591,13,-86.45009403,0\S,15,1.83933507,14,117.43128534,13,48.46865846,0\C,16,1.50784777,15,115.97723886,14,63.68278098,0\C,18,1.40278653,16,120.48301461,15,92.76721891,0\C,19,1.39385802,18,120.32221656,16,178.05868942,0\C,20,1.39657187,19,120.12685087,18,-0.13602399,0\C,21,1.39660311,20,119.97187129,19,-0.34322374,0\C,22,1.3943304,21,119.92420535,20,0.33516832,0\O,17,1.46042429,15,101.95095073,14,178.54690653,0\O,17,1.45972136,15,106.84027009,14,-51.82564614,0\C,17,1.77876701,15,105.29399498,14,64.04022791,0\C,26,1.40049089,17,118.71177984,15,98.70086703,0\C,27,1.39164004,26,118.71786703,17,176.03809017,0\C,28,1.40441288,27,121.28609417,26,-0.43666493,0\C,29,1.40440705,28,118.50603053,27,-0.08029257,0\C,30,1.3914253,29,121.37848696,28,-0.19846104,0\C,29,1.5072853,28,120.74268767,27,-178.23336776,0\H,1,1.08566127,6,119.73710666,5,-179.01319971,0\H,2,1.08583554,1,119.99947118,6,179.88616439,0\H,3,1.08557526,2,120.07788808,1,179.35500676,0\H,4,1.08583693,3,119.48328446,2,177.63227045,0\H,6,1.08442988,1,119.58653549,2,178.03404414,0\H,9,1.08272789,7,119.63343832,5,-141.17591012,0\H,9,1.08781159,7,121.18741239,5,16.19866958,0\H,10,1.08523298,8,119.72959895,7,4.34299725,0\H,11,1.08556391,10,119.7717591,8,-178.38093565,0\H,12,1.08574971,11,119.87217555,10,178.45505777,0\H,13,1.0

8232284,12,120.76632737,11,178.52548243,0\H,16,1.09035697,15,105.28179  
682,14,-172.36776843,0\H,16,1.09347223,15,103.99262246,14,-58.29358698  
,0\H,19,1.08624401,18,119.84607756,16,-1.51362189,0\H,20,1.08584611,19  
,119.71669182,18,-179.71595173,0\H,21,1.08614336,20,120.02619406,19,-1  
79.70401902,0\H,22,1.08614442,21,120.17107215,20,-178.94725925,0\H,23,  
1.08752477,22,119.65744485,21,-178.76466886,0\H,27,1.08488211,26,120.2  
9121184,17,-2.51581499,0\H,28,1.08643959,27,119.17943636,26,-179.49784  
972,0\H,30,1.08641337,29,119.4720524,28,-179.22374577,0\H,31,1.0838891  
7,30,120.64962832,29,-177.85770254,0\H,32,1.0940928,29,111.57681794,28  
,-150.99859604,0\H,32,1.09399919,29,111.58891586,28,-29.45947052,0\H,3  
2,1.09774179,29,110.37676068,28,89.78425046,0\\Version=ES64L-G16RevA.0  
3\State=2-A\HF=-1685.5082936\S2=0.761314\S2-1=0.\S2A=0.750114\RMSD=3.7  
85e-09\Dipole=-1.467687,3.0252723,1.6835278\Quadrupole=9.9083635,-12.4  
691282,2.5607647,11.1507652,2.5331243,3.7474036\PG=C01 [X(C28H25N1O2S1  
)]\\@

## INT1

1\1\GINC-OMC-1-802\SP\UB3LYP\6-311+G(d,p)\C28H25N1O2S1(1+,2)\SHIMGRP\2  
3-Nov-2021\0\\#p b3lyp/6-311+G(d,p) scrf=(iefpcm,smd,solvent=acetonitr  
ile)\\int2\\1,2\C,0,0.242698,2.22692,3.087886\C,0,1.471574,1.565997,2.  
936815\C,0,1.798345,0.932165,1.732746\C,0,0.864862,0.982192,0.705688\C  
,0,-0.414903,1.586007,0.847572\C,0,-0.699414,2.243676,2.066536\N,0,0.9  
94522,0.380625,-0.612047\C,0,-0.245055,0.81875,-1.376251\C,0,-1.169699  
,1.42222,-0.351671\S,0,0.948722,-1.673638,-0.454226\C,0,-2.536673,1.73  
7531,-0.663615\C,0,-2.956291,1.813971,-2.017562\C,0,-4.269176,2.12422,  
-2.347406\C,0,-5.212962,2.356269,-1.341571\C,0,-4.828309,2.26291,0.000  
39\C,0,-3.516573,1.957198,0.338548\C,0,2.246895,0.739628,-1.462896\O,0  
,1.173823,-2.058427,-1.846752\O,0,1.887616,-1.927368,0.629808\C,0,-0.6  
99152,-2.057169,0.047783\C,0,-1.016599,-2.019626,1.41236\C,0,-2.303606  
,-2.375337,1.798681\C,0,-3.267813,-2.771462,0.856147\C,0,-2.909899,-2.  
803008,-0.502938\C,0,-1.632947,-2.450265,-0.921681\C,0,-4.645976,-3.19  
2297,1.294477\C,0,3.623885,0.475491,-0.918149\C,0,4.318748,1.506097,-0  
.265136\C,0,5.628082,1.311869,0.171621\C,0,6.26195,0.087433,-0.051155\  
C,0,5.58763,-0.935153,-0.721311\C,0,4.278397,-0.741543,-1.159404\H,0,0  
.023331,2.738052,4.020494\H,0,2.184568,1.552396,3.754578\H,0,2.742197,  
0.41893,1.616663\H,0,-1.627776,2.785276,2.196603\H,0,0.079728,1.54716,  
-2.128906\H,0,-0.663907,-0.032873,-1.918123\H,0,-2.238407,1.659327,-2.  
818297\H,0,-4.558748,2.192231,-3.391881\H,0,-6.238533,2.600946,-1.6005  
98\H,0,-5.560399,2.421253,0.786931\H,0,-3.255543,1.839545,1.383349\H,0  
,2.081797,0.203693,-2.399865\H,0,2.11848,1.809797,-1.644562\H,0,-0.270  
944,-1.73922,2.147654\H,0,-2.562719,-2.357461,2.853369\H,0,-3.640122,-  
3.120471,-1.241761\H,0,-1.35267,-2.508361,-1.967906\H,0,-4.922675,-2.7  
35549,2.248909\H,0,-5.402162,-2.927584,0.549245\H,0,-4.687378,-4.28131  
6,1.427554\H,0,3.835552,2.467032,-0.10531\H,0,6.156345,2.118228,0.6715  
65\H,0,7.284353,-0.063545,0.282646\H,0,6.084389,-1.881177,-0.913992\H,

0,3.77041,-1.534217,-1.699901\\Version=ES64L-G16RevA.03\\State=2-A\\HF=-1685.5395715\\S2=0.77838\\S2-1=0.\\S2A=0.750722\\RMSD=2.012e-09\\Dipole=-1.6667847,0.7581056,0.0789834\\Quadrupole=16.2419609,-12.5451055,-3.6968554,12.6479931,0.4438761,0.290466\\PG=C01 [X(C28H25N1O2S1)]\\@

## INT2

1\\1\\GINC-OMC-1-801\\SP\\RB3LYP\\6-311+G(d,p)\\C21H18N1(1+)\\SHIMGRP\\23-Nov-2021\\0\\#p b3lyp/6-311+G(d,p) scrf=(iefpcm,smd,solvent=acetonitrile)\\int3\\1,1\\C,0,-2.023586,3.5796,0.655429\\C,0,-0.735148,4.085346,0.288175\\C,0,0.280941,3.277331,-0.165711\\C,0,0.012345,1.890654,-0.280335\\C,0,-1.304356,1.363438,0.035681\\C,0,-2.310858,2.247525,0.538415\\N,0,0.832766,0.8976,-0.653336\\C,0,0.111046,-0.365232,-0.628929\\C,0,-1.280755,-0.011824,-0.181164\\C,0,-2.335036,-0.997291,-0.064523\\C,0,-2.021814,-2.344071,0.23269\\C,0,-3.02711,-3.295715,0.346712\\C,0,-4.362611,-2.932024,0.14542\\C,0,-4.688714,-1.610269,-0.173795\\C,0,-3.689774,-0.649851,-0.274963\\C,0,2.242367,0.993655,-1.07217\\C,0,3.123694,-0.035084,-0.393643\\C,0,3.702823,-1.067762,-1.13909\\C,0,4.524269,-2.011833,-0.518512\\C,0,4.766212,-1.931423,0.852824\\C,0,4.189684,-0.902953,1.604247\\C,0,3.374355,0.042154,0.984195\\H,0,-2.767184,4.268826,1.040914\\H,0,-0.551349,5.151345,0.387678\\H,0,1.24828,3.692263,-0.423237\\H,0,-3.273776,1.858426,0.846824\\H,0,0.614727,-1.074805,0.039407\\H,0,0.096984,-0.819682,-1.629145\\H,0,-0.991995,-2.637219,0.412921\\H,0,-2.772981,-4.321417,0.594901\\H,0,-5.146257,-3.678967,0.22887\\H,0,-5.722331,-1.332992,-0.355733\\H,0,-3.947984,0.358721,-0.577735\\H,0,2.289886,0.878304,-2.161784\\H,0,2.575075,2.007321,-0.836071\\H,0,3.524263,-1.128406,-2.2104\\H,0,4.976054,-2.804347,-1.107647\\H,0,5.407395,-2.662744,1.335931\\H,0,4.384724,-0.83207,2.67029\\H,0,2.939276,0.848025,1.571652\\Version=ES64L-G16RevA.03\\State=1-A\\HF=-865.9055679\\RMSD=9.644e-09\\Dipole=-0.6892637,1.0439994,-0.5979358\\Quadrupole=6.496685,9.4668289,-15.9635139,0.1329181,-2.5008401,0.6659563\\PG=C01 [X(C21H18N1)]\\@

## TS2

1\\1\\GINC-OMC-1-822\\SP\\RB3LYP\\6-311+G(d,p)\\C28H25N1O2S1\\SHIMGRP\\19-Feb-2022\\0\\#p b3lyp/6-311+G(d,p) scrf=(iefpcm,smd,solvent=acetonitrile)\\int2\\0,1\\C,0,4.601063,2.343794,0.04249\\C,0,4.84832,0.962124,-0.205663\\C,0,3.838201,0.051995,-0.420997\\C,0,2.50031,0.530149,-0.418422\\C,0,2.239816,1.937618,-0.21024\\C,0,3.318228,2.829483,0.049066\\N,0,1.326217,-0.118601,-0.580414\\C,0,0.241137,0.817965,-0.42669\\C,0,0.853151,2.132241,-0.274993\\S,0,-1.794761,-1.068382,2.044431\\C,0,0.098713,3.379017,-0.172813\\C,0,-1.163941,3.398355,0.45467\\C,0,-1.880787,4.588794,0.548768\\C,0,-1.368382,5.771126,0.009631\\C,0,-0.125193,5.759958,-0.627291\\C,0,0.604667,4.577782,-0.715642\\C,0,1.015882,-1.5315,-0.886476\\O,0,-1.333842,0.402322,1.760797\\O,0,-0.736672,-2.08428,1.633551\\C,0,-3.087666,-1.297669,0.760025\\C,0,-3.27038,-2.558497,0.191145\\C,0,-4.293848,-2.758934,-0.735797\\C,0,-5.154912,-1.715192,-1.101539\\C,0,-4.954973,-0.455906,-0.517877\\C,0,-3.935366,-0.245444,0.410435\\C,0,-6.288475,-1.945351,-2.0

74353\C,0,2.076583,-2.545064,-0.521111\C,0,2.869195,-3.13986,-1.510758  
 \C,0,3.837314,-4.087321,-1.171866\C,0,4.016502,-4.450203,0.164292\C,0,  
 3.213798,-3.876096,1.153636\C,0,2.242709,-2.933206,0.816232\H,0,5.4387  
 25,3.005643,0.240134\H,0,5.876314,0.609503,-0.210837\H,0,4.061423,-0.9  
 91718,-0.586453\H,0,3.115986,3.872639,0.266336\H,0,-0.511181,0.727519,  
 -1.21808\H,0,-0.400595,0.554809,0.558364\H,0,-1.553512,2.489653,0.9052  
 26\H,0,-2.844392,4.592786,1.050794\H,0,-1.935377,6.695266,0.08174\H,0,  
 0.273356,6.671984,-1.063283\H,0,1.55152,4.569092,-1.246232\H,0,0.11035  
 5,-1.761244,-0.309758\H,0,0.786598,-1.594983,-1.958486\H,0,-2.594327,-  
 3.364284,0.461773\H,0,-4.424955,-3.741014,-1.186203\H,0,-5.605183,0.37  
 0885,-0.797866\H,0,-3.783084,0.735079,0.852149\H,0,-6.537843,-1.034009  
 ,-2.6295\H,0,-6.039444,-2.726386,-2.800535\H,0,-7.200779,-2.265489,-1.  
 553155\H,0,2.73074,-2.856706,-2.552341\H,0,4.445815,-4.542405,-1.94900  
 5\H,0,4.768934,-5.187557,0.431816\H,0,3.335292,-4.173364,2.191861\H,0,  
 1.582377,-2.516666,1.571581\\Version=ES64L-G16RevA.03\\State=1-A\\HF=-16  
 85.7536664\\RMSD=6.686e-09\\Dipole=1.7175232,1.9972122,-3.2436771\\Quadru  
 pole=15.5554119,4.3722891,-19.9277009,-1.5046153,5.4953449,5.1807557\\P  
 G=C01 [X(C28H25N1O2S1)]\\@

## TsH

1\1\GINC-OMC-1-820\SP\RB3LYP\6-311+G(d,p)\C7H8O2S1\SHIMGRP\16-Feb-2022  
 \0\\#p b3lyp/6-311+G(d,p) geom=check scrf=(iefpcm,smd,solvent=acetonit  
 rile)\\int1\\0,1\\S,0,-2.1413670203,0.197987653,0.5001718518\\O,0,-2.612  
 1906049,-1.1879091228,0.2082148399\\O,0,-2.4889086683,1.2292882046,-0.7  
 88786527\C,0,-0.3394719758,0.1492021191,0.2526934335\C,0,0.2906682991,  
 -1.0850679717,0.1137680073\C,0,1.678148667,-1.1296756002,-0.029053956\  
 C,0,2.4456775866,0.0420819645,-0.0192626228\C,0,1.7854430041,1.2728296  
 613,0.1284080838\C,0,0.4017163726,1.3343789375,0.2688310291\C,0,3.9502  
 286004,-0.0125906034,-0.139601739\H,0,-0.3103564161,-1.9894564995,0.10  
 70400364\H,0,2.1727348181,-2.0908103851,-0.1483237348\H,0,2.3647843433  
 ,2.1933030476,0.1301426414\H,0,-0.0990760921,2.2935210042,0.3696268523  
 \H,0,4.2833263781,-0.958313899,-0.5783068973\H,0,4.3328250818,0.804350  
 1725,-0.7612095364\H,0,4.4280777475,0.0793587553,0.8446778895\H,0,-2.1  
 437929311,0.8242677921,-1.6100445217\\Version=ES64L-G16RevA.03\\State=1  
 -A\\HF=-820.3161228\\RMSD=3.864e-09\\Dipole=2.3486104,0.6567008,-0.331131  
 8\\Quadrupole=-2.4554964,0.8809517,1.5745448,-2.9817253,0.3578745,0.748  
 5925\\PG=C01 [X(C7H8O2S1)]\\@

## 2a

1\1\GINC-OMC-1-820\SP\RB3LYP\6-311+G(d,p)\C21H17N1\SHIMGRP\10-Dec-2021  
 \0\\#p scrf=(iefpcm,smd,solvent=acetonitrile) b3lyp/6-311+G(d,p)\\CW-D  
 J-Freq\\0,1\\N,0,0.679017,-0.119825,-1.003563\C,0,0.447251,1.162762,-0.  
 533932\C,0,1.313604,2.259653,-0.462863\C,0,0.797667,3.454708,0.024405\  
 C,0,-0.549494,3.55647,0.425463\C,0,-1.403632,2.462827,0.359158\C,0,-0.  
 909387,1.233973,-0.113029\C,0,-1.495223,-0.070857,-0.341342\C,0,-0.491

581,-0.843634,-0.882271\C,0,-2.870143,-0.516531,-0.067237\C,0,-3.56584  
9,-0.077476,1.073912\C,0,-4.862715,-0.517018,1.336802\C,0,-5.493821,-1  
.413,0.47206\C,0,-4.814542,-1.862377,-0.662401\C,0,-3.52293,-1.414133,  
-0.931928\C,0,1.939984,-0.626996,-1.515785\C,0,3.021283,-0.838241,-0.4  
65064\C,0,2.705806,-1.261564,0.830989\C,0,3.717094,-1.495459,1.763019\  
C,0,5.055914,-1.312428,1.410617\C,0,5.377963,-0.888816,0.1206\C,0,4.36  
4605,-0.649826,-0.808983\H,0,2.352785,2.18037,-0.767434\H,0,1.444425,4  
.324955,0.09538\H,0,-0.925175,4.508334,0.791012\H,0,-2.443237,2.559732  
,0.657027\H,0,-0.513042,-1.885126,-1.174816\H,0,-3.073092,0.592301,1.7  
72222\H,0,-5.377954,-0.16512,2.22709\H,0,-6.504316,-1.755493,0.678193\  
H,0,-5.297157,-2.554457,-1.348027\H,0,-3.014858,-1.74289,-1.834861\H,0  
,2.308856,0.056054,-2.29125\H,0,1.715751,-1.574846,-2.019715\H,0,1.665  
425,-1.397068,1.113432\H,0,3.457938,-1.818975,2.767631\H,0,5.842165,-1  
.49332,2.138524\H,0,6.416364,-0.735471,-0.161099\H,0,4.620866,-0.31241  
9,-1.811502\\Version=ES64L-G16RevA.03\State=1-A\HF=-865.4799819\RMSD=6  
.087e-09\Dipole=1.0585731,-0.8204678,-0.6137553\Quadrupole=5.2071772,-  
4.9027439,-0.3044333,2.1045142,-5.3107375,4.0031686\PG=C01 [X(C21H17N1  
)]\\@

## PC

1\1\GINC-B2167\SP\UB3LYP\6-311+G(d,p)\C36H40B1F4N1(1-,2)\ROOT\20-Jan-2  
022\0\#p geom=check scrf=(iefpcm,smd,solvent=acetonitrile) b3lyp/6-31  
1+G(d,p)\\Title Card Required\\-1,2\C,0,-1.78269258,3.6458657207,0.114  
7452203\C,0,-0.6654490866,2.8368928125,-0.1485033365\C,0,-0.7471291682  
,1.4416837349,-0.2297875745\C,0,-2.0024724215,0.789402775,-0.003573129  
6\C,0,-3.1188476423,1.6217636121,0.251742571\C,0,-3.0168903353,3.00613  
74924,0.3054016602\C,0,-2.0832175492,-0.6339548472,-0.0336779516\C,0,-  
0.8921846592,-1.3950916349,-0.2491107535\C,0,0.3521271006,-0.737878989  
,-0.4897633265\C,0,1.5194979004,-1.4874608007,-0.6908706888\H,0,2.4523  
634205,-0.9660133263,-0.8370251325\C,0,1.521200862,-2.8848946315,-0.65  
8003711\C,0,0.2915252579,-3.5318211299,-0.423521364\C,0,-0.8739220893,  
-2.8113511915,-0.2300460993\H,0,0.3028585846,3.298675592,-0.2907996652  
\H,0,-4.0826380095,1.1492932014,0.4148596053\H,0,-3.9138454973,3.58254  
41473,0.5053954994\H,0,0.2455989881,-4.6157886491,-0.3761329654\H,0,-1  
.8078088777,-3.334817692,-0.0483063374\N,0,0.3830840661,0.6695725687,-  
0.5262108811\C,0,1.5996475297,1.3425493729,-0.9177909792\C,0,1.6791938  
118,1.8950514145,-2.2021376902\C,0,2.679722502,1.4336280116,-0.0395685  
635\C,0,2.8421905874,2.5526047306,-2.6000693136\H,0,0.8293889086,1.807  
3701359,-2.8734705372\C,0,3.8529609543,2.0713125872,-0.4536671212\H,0,  
2.6503929886,0.9636706355,0.9371697589\C,0,3.9298986732,2.6389084565,-  
1.7252756622\H,0,2.9034727182,2.9828903449,-3.5971838497\H,0,4.6910609  
295,2.0764508051,0.2331182307\H,0,4.843527463,3.1350127725,-2.04436311  
26\C,0,2.8233735561,-3.6928363819,-0.7924919533\C,0,3.9868368937,-2.84  
84219442,-1.3527695412\C,0,3.2249701878,-4.1940804282,0.617352833\C,0,  
2.6124100638,-4.9002851869,-1.7355529303\H,0,3.7261548239,-2.400272254

6,-2.320472531\H,0,4.3016522021,-2.0569856177,-0.666989169\H,0,4.85709  
61825,-3.497272615,-1.513054322\H,0,2.4404871552,-4.8249434889,1.05443  
08417\H,0,4.1462891344,-4.7893015052,0.5602213116\H,0,3.4045376516,-3.  
3414595542,1.2786372296\H,0,3.5488952527,-5.4635705864,-1.8328728904\H  
,0,1.8514230878,-5.5967630262,-1.3661900316\H,0,2.3096880728,-4.572610  
7306,-2.7380575781\C,0,-1.6045241628,5.1725796133,0.1859881801\C,0,-0.  
6115902721,5.5281437987,1.3186310856\C,0,-1.0479209812,5.6958480437,-1  
.1601019086\C,0,-2.931418435,5.9027735591,0.4684356677\H,0,-0.98676580  
43,5.1807430215,2.2881173184\H,0,0.3683226567,5.0678181127,1.158906917  
8\H,0,-0.4670831771,6.6151049489,1.3772870044\H,0,-1.7415814036,5.4750  
03039,-1.9801026375\H,0,-0.9018378867,6.7834259086,-1.120087547\H,0,-0  
.0851290857,5.2371570354,-1.4063799476\H,0,-2.7583769337,6.9850270736,  
0.5079713451\H,0,-3.6746804389,5.7133307308,-0.3148134892\H,0,-3.36461  
31701,5.6007615494,1.4288688782\C,0,-3.3918473068,-1.320930355,0.19591  
42525\C,0,-4.2288971703,-1.6394368718,-0.8950013145\C,0,-3.7991716328,  
-1.6620544784,1.5043902474\C,0,-5.4485551721,-2.284502533,-0.662387727  
9\C,0,-5.0261337154,-2.3069140517,1.6954841387\C,0,-5.8682344871,-2.62  
4278958,0.6262946645\H,0,-6.0850374285,-2.5292290639,-1.5117810556\H,0  
,-5.3289477801,-2.5702410124,2.7080335672\C,0,-2.9194534396,-1.3420542  
784,2.6915688482\H,0,-1.9361081648,-1.8169847254,2.5996576657\H,0,-2.7  
407446412,-0.2638114733,2.7761204866\H,0,-3.3790569525,-1.6856586223,3  
.624389363\C,0,-3.8133760922,-1.294245773,-2.3073065067\H,0,-3.6555737  
458,-0.2155959958,-2.4236755667\H,0,-2.868568544,-1.7817590859,-2.5744  
048544\H,0,-4.575736959,-1.6077433756,-3.0287318926\C,0,-7.2044869211,  
-3.292083349,0.8599183486\H,0,-7.9982898977,-2.5535243079,1.0399791356  
\H,0,-7.5107311547,-3.8905285218,-0.0055552738\H,0,-7.1755870692,-3.95  
28654933,1.7338053728\B,0,4.9904288763,-0.4530684172,1.8287941202\F,0,  
5.7794664735,-1.0919471837,2.7816410246\F,0,5.5958938487,-0.5129112199  
,0.5558057884\F,0,4.7972622279,0.9056487979,2.1814909072\F,0,3.7141553  
479,-1.0762157983,1.750154325\\Version=ES64L-G16RevA.03\State=2-A\HF=-  
1875.8595775\S2=0.769385\S2-1=0.\S2A=0.75032\RMSD=4.791e-09\Dipole=-7.  
8513611,1.2452701,-3.3196979\Quadrupole=-45.9727702,29.8487193,16.1240  
509,12.6136744,-32.2598247,-1.1653238\PG=C01 [X(C36H40B1F4N1)]\@

## PC

1\1\GINC-B2074\SP\RB3LYP\6-311+G(d,p)\C36H40B1F4N1\ROOT\19-Jan-2022\0\  
\#p geom=check scrf=(iefpcm,smd,solvent=acetonitrile) b3lyp/6-311+G(d,  
p)\Title Card Required\0,1\C,0,1.8972236085,2.8717488699,-0.80488218  
5\C,0,2.0153084859,1.4969741238,-0.8438661405\C,0,0.8795037591,0.66329  
03607,-0.7890772431\C,0,-0.4293246782,1.2447999313,-0.7195221881\C,0,-  
0.5277133705,2.6665746094,-0.8056939716\C,0,0.5901354081,3.4463901181,  
-0.8584145298\C,0,-1.550640028,0.4282966286,-0.5127911277\C,0,-1.37520  
3397,-0.9746274534,-0.4450795801\C,0,-0.0684910955,-1.5392936778,-0.57  
13582245\C,0,0.0962179686,-2.940119109,-0.5007083361\H,0,1.0945911343,  
-3.344758489,-0.5897131665\C,0,-0.9767363505,-3.794455727,-0.298329048

4\C,0,-2.273267603,-3.2252869125,-0.1691257263\C,0,-2.4618973513,-1.86  
72115603,-0.2363895862\H,0,2.9894012086,1.0378349714,-0.808642269\H,0,  
-1.5149400014,3.1139945228,-0.7907897327\H,0,0.4817552622,4.5252680167  
, -0.8853058641\H,0,-3.132643346,-3.8642073876,-0.0073130649\H,0,-3.455  
208702,-1.446645205,-0.1258933644\N,0,1.0121139478,-0.7056087243,-0.76  
13034549\C,0,2.3440694627,-1.2911570014,-0.8100819965\C,0,2.8591669091  
, -1.7059806386,-2.0386829265\C,0,3.0646201705,-1.4287128078,0.37646867  
15\C,0,4.129146251,-2.2835442377,-2.0795837802\H,0,2.2731249355,-1.578  
9315382,-2.9444201152\C,0,4.3344974269,-2.0058469553,0.3177426161\H,0,  
2.6388000588,-1.0533836515,1.2996028598\C,0,4.8645440655,-2.4348721389  
, -0.9013742092\H,0,4.5416520881,-2.6109189122,-3.0296418445\H,0,4.9114  
449236,-2.1100225931,1.2318456428\H,0,5.8541988104,-2.8820475942,-0.93  
57207971\C,0,-0.7296066645,-5.3114468593,-0.2081586798\C,0,-0.06548949  
35,-5.8026804713,-1.5171342799\C,0,0.2098411832,-5.6019541461,0.987680  
6676\C,0,-2.0331227295,-6.1069195639,-0.0023817081\H,0,-0.710727314,-5  
.6125428355,-2.3825387065\H,0,0.8954742683,-5.3108429384,-1.6992526429  
\H,0,0.118335526,-6.8820479868,-1.4622139676\H,0,-0.2347042948,-5.2620  
657407,1.929449724\H,0,0.393634113,-6.6799600805,1.0668354922\H,0,1.17  
8562904,-5.1043423983,0.8777269044\H,0,-1.8028400918,-7.1764554525,0.0  
494144901\H,0,-2.5366542624,-5.8347927375,0.9319468197\H,0,-2.73789418  
88,-5.9622375014,-0.8292797608\C,0,3.1115959775,3.7862710894,-0.621360  
418\C,0,2.881825714,4.6044855778,0.6772230333\C,0,4.4169671251,2.98777  
39104,-0.4489731521\C,0,3.2483938347,4.735287315,-1.8341411535\H,0,2.0  
44926812,5.3041443512,0.577846025\H,0,2.6649406166,3.9344233268,1.5132  
703524\H,0,3.7795693936,5.1911935722,0.905431243\H,0,4.6585147106,2.39  
35676297,-1.3390493162\H,0,5.2487208959,3.6816926532,-0.2850351547\H,0  
, 4.3498626929,2.3229194579,0.4178454893\H,0,4.0881188914,5.4221764358,  
-1.6763089907\H,0,3.4388279721,4.1752890758,-2.7575962405\H,0,2.349498  
2559,5.3428410823,-1.987532038\C,0,-2.9025861141,1.0326100066,-0.30546  
96638\C,0,-3.7850130931,1.1971342368,-1.3921514095\C,0,-3.2720755961,1  
.4320907102,0.9988108003\C,0,-5.0404367549,1.7659081432,-1.156664512\C  
,0,-4.5419094354,1.9913882265,1.1792256111\C,0,-5.4371010039,2.1719129  
203,0.1207709394\H,0,-5.7237349577,1.8937427562,-1.9938799239\H,0,-4.8  
357168895,2.2953148906,2.1818032998\C,0,-2.33422539,1.2717461682,2.173  
1878773\H,0,-1.9366678782,0.2544784227,2.2530712116\H,0,-1.4523207152,  
1.9183383844,2.0992116238\H,0,-2.8503297889,1.5089618395,3.1081840792\  
C,0,-3.3950783781,0.774937829,-2.7920388315\H,0,-2.4829456252,1.282327  
3204,-3.12918371\H,0,-3.2015627677,-0.3031696905,-2.8538475015\H,0,-4.  
1903234046,1.0108870492,-3.5051789102\C,0,-6.7868286158,2.8116591296,0  
.3485747134\H,0,-6.7161543621,3.9070913847,0.3166673662\H,0,-7.5091619  
339,2.5094630925,-0.4169595897\H,0,-7.1968723033,2.5436022024,1.328173  
2471\B,0,1.4869976106,1.1427832977,2.5858188463\F,0,1.4982609272,1.095  
1206992,3.9655968856\F,0,2.8069668514,1.1440497934,2.0666279227\F,0,0.  
8175495759,2.2984721743,2.1177781968\F,0,0.8148662331,-0.0043505897,2.  
0562300829\\Version=ES64L-G16RevA.03\State=1-A\HF=-1875.7273153\RMSD=3

.200e-09\Dipole=-1.837792,-2.5039071,-5.1920543\Quadrupole=13.6230767,  
14.8551365,-28.4782132,-8.560363,-14.0109051,-7.4795307\PG=C01 [X(C36H  
40B1F4N1)]\@

**1n<sup>+</sup>**

1\1\GINC-OMC-1-810\SP\UB3LYP\6-311+G(d,p)\C29H24F3N1O2S1(1+,2)\SHIMGRP  
\16-Feb-2022\0\#p b3lyp/6-311+G(d,p) geom=check scrf=(iefpcm,smd,solv  
ent=acetonitrile)\int1-pcf3\1,2\C,0,-4.4592512807,0.1260518725,0.324  
0979318\C,0,-5.183167683,-0.8920373175,-0.3008413396\C,0,-4.5160655618  
, -1.9995890298,-0.8336283308\C,0,-3.1317345049,-2.0854832049,-0.745682  
598\C,0,-2.3836921244,-1.0656141807,-0.1266657373\C,0,-3.0743249394,0.  
0350968075,0.4167842069\C,0,-0.9024163486,-1.1295715429,-0.0750094669\  
C,0,-0.2077647559,-0.607248239,1.1254055351\C,0,-0.1817354364,-1.71674  
7868,-1.0633113207\C,0,-0.6773196663,-0.9707162106,2.3978461106\C,0,0.  
0493163393,-0.6820071401,3.5462537283\C,0,1.2664451535,0.0156048421,3.  
4525695684\C,0,1.7450444788,0.4298455948,2.2229425351\C,0,1.008260608,  
0.1602937442,1.0428270112\N,0,1.4266966438,0.6698157196,-0.1860444632\  
C,0,0.5332844818,1.5247264264,-1.0371958979\S,0,3.1985217521,0.7694032  
658,-0.6282956451\C,0,0.7000459486,2.9790651139,-0.6521627483\C,0,1.43  
25146045,3.8544848585,-1.4711147225\C,0,1.5344085434,5.2031240588,-1.1  
377037964\C,0,0.926023924,5.6858427965,0.0242491332\C,0,0.2062400653,4  
.8171299236,0.85347426\C,0,0.1005973544,3.4710347079,0.5208953518\O,0,  
3.1367421014,1.1531016631,-2.0336266632\O,0,3.863170755,1.5884005566,0  
.3789256068\C,0,3.7343232001,-0.9173309317,-0.4961847562\C,0,3.5663857  
946,-1.7643421991,-1.599243247\C,0,4.0410746702,-3.0692287157,-1.51751  
42193\C,0,4.6895450759,-3.5386674783,-0.3626463805\C,0,4.8532171235,-2  
.6581349763,0.7188677984\C,0,4.3867929711,-1.3480796388,0.6634612309\C  
,0,5.2351725738,-4.9421246579,-0.3030492985\H,0,-4.9778837063,0.989122  
3549,0.7272523829\H,0,-5.0814112144,-2.7918340755,-1.3125078274\H,0,-2  
.6276804957,-2.9629244887,-1.13815649\H,0,-2.5235188771,0.8363438093,0  
.9004663241\H,0,0.8898458504,-1.8552675133,-0.9859518702\H,0,-0.664164  
558,-2.1071946618,-1.9537303532\H,0,-1.5994644175,-1.5372832459,2.4702  
810011\H,0,-0.3193671107,-1.0057758403,4.5146140125\H,0,1.818755828,0.  
2673622307,4.3527072744\H,0,2.6361647586,1.0407351084,2.1600662147\H,0  
,0.7964111327,1.3494321681,-2.0789163607\H,0,-0.4859974051,1.178180099  
2,-0.8739385343\H,0,1.9128470271,3.4768376996,-2.3679765089\H,0,2.0886  
86294,5.8775000512,-1.7831778609\H,0,1.0137907083,6.7359255452,0.28691  
45299\H,0,-0.2713937011,5.1938799108,1.7529016567\H,0,-0.4610064889,2.  
80039076,1.1673554109\H,0,3.1008881396,-1.3978266299,-2.508113436\H,0,  
3.9222940451,-3.7311186297,-2.3708104684\H,0,5.3667342635,-2.999497904  
4,1.613265335\H,0,4.5489355736,-0.6672738872,1.491125984\H,0,4.6455710  
292,-5.629601373,-0.9168161541\H,0,6.2651997307,-4.9678540007,-0.68194  
3911\H,0,5.2556806552,-5.3228126331,0.7223438031\C,0,-6.6921038789,-0.  
8279326348,-0.3452277242\F,0,-7.2297653658,-1.4234819863,0.739748168\F  
,0,-7.1296366041,0.4465097447,-0.3657469358\F,0,-7.1786850739,-1.45446

45977,-1.4337770397\\Version=ES64L-G16RevA.03\\State=2-A\\HF=-2022.66504  
45\\S2=0.762014\\S2-1=0.\\S2A=0.750112\\RMSD=3.764e-09\\Dipole=2.3700569,-2  
.5205852,1.6295956\\Quadrupole=-19.3999668,14.1912665,5.2087003,-21.454  
1111,1.7490241,6.6713878\\PG=C01 [X(C29H24F3N1O2S1)]\\@

#### TS1-1n

1\\1\\GINC-OMC-1-812\\SP\\UB3LYP\\6-311+G(d,p)\\C29H24F3N1O2S1(1+,2)\\SHIMGRP  
\\18-Feb-2022\\0\\#p b3lyp/6-311+G(d,p) geom=check scrf=(iefpcm,smd,solv  
ent=acetonitrile)\\Tilte Card Required\\1,2\\C,0,-4.4353402307,-3.32655  
77808,0.1034344196\\C,0,-4.3677350293,-4.2717519668,-0.9262245531\\C,0,-  
3.1882484558,-4.4251695938,-1.6648356889\\C,0,-2.0826870679,-3.64131713  
35,-1.3723150211\\C,0,-2.1265931788,-2.6775134169,-0.3347234785\\C,0,-3.  
3302569796,-2.5414860145,0.3997383177\\C,0,-0.9610312175,-1.8608005875,  
-0.0474818581\\C,0,-0.7856996996,-1.0818247778,1.1783436058\\C,0,0.01994  
25057,-1.5525228482,-1.0095628615\\C,0,-1.1133157912,-1.4746703698,2.48  
40786055\\C,0,-0.914943441,-0.5896251725,3.5415672016\\C,0,-0.4278151198  
,0.6984446116,3.2996528745\\C,0,-0.1138776413,1.1209816967,2.0027569728  
\\C,0,-0.2705299196,0.2222571768,0.949630632\\N,0,-0.0196387205,0.532938  
1335,-0.4452007623\\C,0,-1.1911770711,1.1393546185,-1.2163195742\\S,0,1.  
5664512568,1.3752913712,-0.8578618743\\C,0,-1.6524447301,2.4955828009,-  
0.746366099\\C,0,-1.1409629956,3.663278438,-1.3322526716\\C,0,-1.6001233  
934,4.9143403723,-0.9239562006\\C,0,-2.5751779328,5.0126521849,0.071062  
1126\\C,0,-3.0972689526,3.8554853421,0.6536848947\\C,0,-2.6385937828,2.6  
037774462,0.2457069659\\O,0,1.4789994788,1.4848015575,-2.3111913691\\O,0  
,1.6603678801,2.5419032931,0.0140826232\\C,0,2.8402735599,0.2150806207,  
-0.41875439\\C,0,3.4043037711,-0.5781297578,-1.4261413972\\C,0,4.4577668  
607,-1.426027059,-1.0981013814\\C,0,4.9628911522,-1.489221548,0.2110036  
722\\C,0,4.3814871462,-0.6717744615,1.1939715938\\C,0,3.3308052175,0.189  
0114921,0.8919831072\\C,0,6.1302617484,-2.3825831547,0.5437415243\\H,0,-  
5.358951033,-3.1980996609,0.6572843169\\H,0,-3.1415486245,-5.1597076126  
, -2.4613588196\\H,0,-1.1627931101,-3.7944920582,-1.9278953549\\H,0,-3.40  
5860073,-1.7908532561,1.1784365644\\H,0,1.0627767089,-1.5158621667,-0.7  
215055008\\H,0,-0.1693603172,-1.689712187,-2.0719816662\\H,0,-1.48616493  
09,-2.4772589412,2.6673927055\\H,0,-1.1422477389,-0.9018987244,4.556036  
5423\\H,0,-0.3007797304,1.3919211491,4.1253706978\\H,0,0.2383896378,2.12  
76222334,1.8183654705\\H,0,-0.8693113664,1.1620030238,-2.2577495451\\H,0  
, -1.9890003423,0.3987449315,-1.1141679754\\H,0,-0.3891994023,3.59195566  
47,-2.1130486634\\H,0,-1.2015196469,5.811631473,-1.3875922316\\H,0,-2.93  
51275443,5.988207991,0.3846911513\\H,0,-3.8683506153,3.9279408633,1.415  
1350914\\H,0,-3.0631561069,1.7052018249,0.6873922341\\H,0,3.0389463199,-  
0.5102900928,-2.4454221794\\H,0,4.9065284057,-2.0383382861,-1.875283686  
\\H,0,4.7687033731,-0.6982859678,2.2086594312\\H,0,2.9144891399,0.840354  
1906,1.6517791665\\H,0,6.0995177013,-2.7136100147,1.5860279343\\H,0,6.15  
71244604,-3.2664680746,-0.100393472\\H,0,7.0761760013,-1.8445536783,0.3  
995019059\\C,0,-5.553931879,-5.1681517963,-1.2054880539\\F,0,-5.58901234

21,-5.544357468,-2.4974013582\F,0,-6.7134472215,-4.5480908486,-0.91647  
9194\F,0,-5.4894541198,-6.2859675139,-0.4549159843\\Version=ES64L-G16R  
evA.03\State=2-A\HF=-2022.654569\S2=0.761898\S2-1=0.\S2A=0.750127\RMSD  
=1.833e-09\Dipole=2.3467984,-1.33462,1.5821673\Quadrupole=10.7896187,-  
14.1501914,3.3605727,-22.2250729,-3.7259557,7.4172032\PG=C01 [X(C29H24  
F3N1O2S1)]\\@

### 1q<sup>+</sup>

1\1\GINC-B2156\SP\UB3LYP\6-311+G(d,p)\C29H27N1O3S1(1+,2)\ROOT\14-Jan-2  
022\0\#p scrf=(iefpcm,smd,solvent=acetonitrile) b3lyp/6-311+G(d,p)\\i  
nt1\\1,2\C,0,-4.850826,-0.070291,0.408228\C,0,-5.533099,-1.090711,-0.2  
9545\C,0,-4.799818,-2.158536,-0.860325\C,0,-3.424653,-2.18729,-0.72671  
\C,0,-2.717207,-1.171705,-0.032997\C,0,-3.48134,-0.119298,0.542032\C,0  
, -1.260729,-1.195348,0.077855\C,0,-0.599691,-0.515592,1.216499\C,0,-0.  
480155,-1.863465,-0.829667\C,0,-1.051135,-0.750924,2.528019\C,0,-0.369  
302,-0.235094,3.622599\C,0,0.762454,0.565007,3.421651\C,0,1.212454,0.8  
48263,2.136207\C,0,0.541528,0.320477,1.020167\N,0,0.924761,0.629745,-0  
.31121\C,0,0.033664,1.518136,-1.137728\S,0,2.640939,0.693339,-0.760222  
\C,0,0.148767,2.980387,-0.767969\C,0,1.014039,3.827746,-1.478104\C,0,1  
.102826,5.179357,-1.148522\C,0,0.336773,5.6977,-0.102414\C,0,-0.525582  
,4.860777,0.612906\C,0,-0.615651,3.510628,0.282639\O,0,2.596529,0.9637  
83,-2.196329\O,0,3.352443,1.577686,0.16176\C,0,3.197611,-0.97953,-0.49  
9683\C,0,3.125579,-1.886797,-1.562849\C,0,3.614663,-3.177052,-1.379125  
\C,0,4.182504,-3.574099,-0.157542\C,0,4.249528,-2.636675,0.884719\C,0,  
3.770133,-1.339274,0.723786\C,0,4.74659,-4.961875,0.015459\H,0,-5.4331  
81,0.744981,0.823998\H,0,-5.304152,-2.959874,-1.38669\H,0,-2.883031,-3  
.032315,-1.13854\H,0,-2.975342,0.676675,1.077563\H,0,0.58652,-1.970511  
, -0.687022\H,0,-0.907313,-2.337424,-1.707604\H,0,-1.917988,-1.38596,2.  
680125\H,0,-0.712615,-0.455368,4.628589\H,0,1.280365,0.997276,4.272657  
\H,0,2.053186,1.512431,1.983022\H,0,0.299154,1.346588,-2.180113\H,0,-0  
.9825,1.152146,-0.978925\H,0,1.614488,3.42498,-2.288154\H,0,1.769625,5  
.827596,-1.709182\H,0,0.408595,6.750416,0.155181\H,0,-1.129775,5.26359  
5,1.420729\H,0,-1.295678,2.866695,0.836191\H,0,2.718546,-1.575017,-2.5  
19052\H,0,3.571007,-3.883826,-2.203437\H,0,4.698307,-2.92188,1.832288\  
H,0,3.859014,-0.613313,1.52383\H,0,4.218341,-5.691532,-0.605821\H,0,5.  
803483,-4.986578,-0.280101\H,0,4.692337,-5.291306,1.057461\O,0,-6.8583  
58,-0.954067,-0.367857\C,0,-7.647127,-1.927194,-1.069316\H,0,-8.675332  
, -1.577737,-0.986084\H,0,-7.354946,-1.975164,-2.123308\H,0,-7.551162,-  
2.912798,-0.602369\\Version=ES64L-G16RevA.03\State=2-A\HF=-1800.085154  
7\S2=0.764151\S2-1=0.\S2A=0.750085\RMSD=2.833e-09\Dipole=-5.341184,-4.  
7301094,0.4357614\Quadrupole=29.1018704,-6.7088234,-22.393047,3.105429  
9,12.6234194,12.052934\PG=C01 [X(C29H27N1O3S1)]\\@

### TS1-1q

1\1\GINC-B2173\SP\UB3LYP\6-311+G(d,p)\C29H27N1O3S1(1+,2)\ROOT\15-Jan-2

```

022\0\#\#p scrf=(iefpcm,smd,solvent=acetonitrile) geom=check b3lyp/6-31
1+G(d,p)\Tilte Card Required\1,2\C,0,-4.2986197223,-3.4851355527,0.5
534749496\C,0,-4.3026474941,-4.4148358232,-0.5115221262\C,0,-3.1758079
235,-4.50911179,-1.3545586461\C,0,-2.0820166196,-3.6936416089,-1.12760
80444\C,0,-2.053570325,-2.7483721983,-0.0669558855\C,0,-3.2045743274,-
2.6792722439,0.7712778483\C,0,-0.8997860926,-1.9178032639,0.142231492\
C,0,-0.6801091966,-1.0681116526,1.3193117768\C,0,0.0366259925,-1.59947
95902,-0.8715937734\C,0,-0.9280482405,-1.3769613746,2.6624808299\C,0,-
0.7217930541,-0.4089386545,3.6455275394\C,0,-0.3008836305,0.875391579,
3.2932966666\C,0,-0.0594480633,1.2119802137,1.9558871363\C,0,-0.218451
8813,0.2301335932,0.9813090399\N,0,-0.0204292924,0.4350783391,-0.44759
05249\C,0,-1.2261798743,0.991631478,-1.2040902298\S,0,1.5314145009,1.2
693512969,-0.9687812766\C,0,-1.7134292752,2.3551259172,-0.7830791691\C
,0,-1.2395544865,3.5096909652,-1.4230124374\C,0,-1.7227948799,4.765408
8483,-1.0588748582\C,0,-2.6870640465,4.8814787737,-0.055267633\C,0,-3.
1733122957,3.7370232907,0.5799341505\C,0,-2.6901240829,2.4805998727,0.
215559478\O,0,1.4100680307,1.2542852076,-2.4246683228\O,0,1.6258129386
,2.5099029117,-0.2049865427\C,0,2.8457586458,0.1797419783,-0.466677541
9\C,0,3.4175691586,-0.6692148943,-1.4221015148\C,0,4.5010768647,-1.460
1523385,-1.0514285252\C,0,5.0274372561,-1.4122034552,0.2494472227\C,0,
4.4367903477,-0.541662438,1.1797667331\C,0,3.3566243917,0.2641331365,0
.8335536402\C,0,6.2255526304,-2.2451228216,0.6277430727\H,0,-5.1826883
423,-3.4180325178,1.1787497614\H,0,-3.1502635726,-5.2232073959,-2.1688
614358\H,0,-1.2092478448,-3.8092717493,-1.7631137616\H,0,-3.2384447911
,-1.9531545583,1.575650729\H,0,1.0928296789,-1.5877496677,-0.631027966
2\H,0,-0.1949194393,-1.7576199569,-1.9228708389\H,0,-1.2504445701,-2.3
768536328,2.9349610483\H,0,-0.8922259195,-0.6566182776,4.6887471961\H,
0,-0.1629865625,1.63020422,4.0614066796\H,0,0.2503519524,2.2128354684,
1.6839280902\H,0,-0.9368536747,0.9760074192,-2.2555173163\H,0,-2.00231
53781,0.2372592672,-1.0463983163\H,0,-0.4966223155,3.4247976386,-2.210
9573557\H,0,-1.3513595248,5.6522085777,-1.5636431967\H,0,-3.0661921491
,5.86036645,0.2237204906\H,0,-3.9350907437,3.8216223573,1.3495626918\H
,0,-3.0855472504,1.5907038941,0.6996528391\H,0,3.0332558891,-0.6883035
921,-2.4364007402\H,0,4.9554555435,-2.115706304,-1.7891120142\H,0,4.83
90043128,-0.4831041021,2.1873157806\H,0,2.9306983872,0.9556474031,1.55
12424596\H,0,6.204399676,-2.5224424455,1.6859857045\H,0,6.284515935,-3
.1600670284,0.0309113716\H,0,7.1523955998,-1.6824360786,0.4564017154\O
,0,-5.4137962739,-5.1514616374,-0.6329043012\C,0,-5.5177477838,-6.1152
24873,-1.6881083455\H,0,-6.5027249192,-6.5661227047,-1.5721360016\H,0,
-5.4461691718,-5.6306066567,-2.6677753142\H,0,-4.7452369008,-6.8855796
983,-1.5904849679\Version=ES64L-G16RevA.03\State=2-A\HF=-1800.0715125
\S2=0.760044\S2-1=0.\S2A=0.750084\RMSD=5.051e-09\Dipole=-0.043281,-3.9
030606,0.4313444\Quadrupole=12.1701859,-0.1244937,-12.0456922,4.148047
6,6.9333098,18.2818632\PG=C01 [X(C29H27N1O3S1)]\@

```

## 11. X-ray Data

Single crystals suitable for XRD were obtained by vapor diffusion experiment:

Compounds **2k** was separately dissolved in 0.5 mL of dichloromethane and 10.0 mL of n-pentane in three glass vials, which were then placed in sealed glass container. Crystals were obtained in about 4-7 days with the evaporation of the solvent.

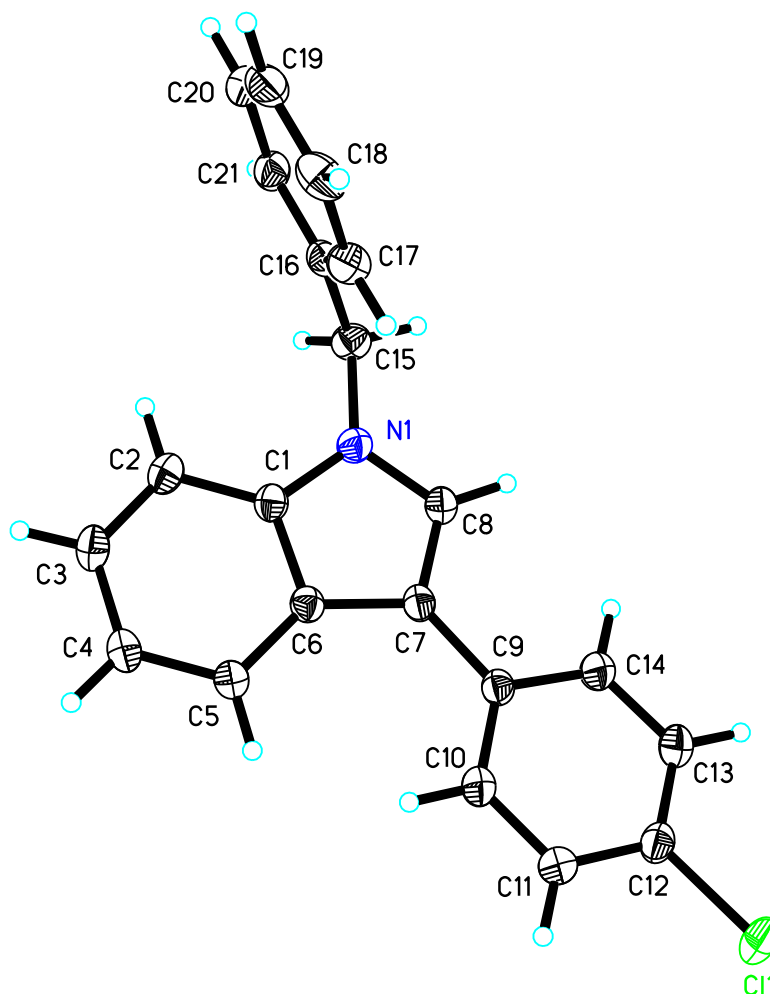

The crystal data of **2k** have been deposited in CCDC with number 2108706. Empirical Formula:  $C_{21}H_{16}ClN$ ; Formula Weight: 317.80; Crystal Color, Habit: colorless; Crystal Dimensions: 0.20 x 0.160 x 0.120 mm<sup>3</sup>; Crystal System: Monoclinic; Lattice Parameters:  $a = 10.7317(3)\text{\AA}$ ,  $b = 5.5110(2)\text{\AA}$ ,  $c = 27.4878(9)\text{\AA}$ ,  $\alpha = 90^\circ$ ,  $\beta = 99.3610(10)^\circ$ ,  $\gamma = 90^\circ$ ,  $V = 1604.05(9)\text{\AA}^3$ ; Space group: P 21/n;  $Z = 4$ ;  $D_{calc} = 1.316\text{ g/cm}^3$ ;  $F_{000} = 664$ ; Final R indices [ $I > 2\sigma(I)$ ]  $R1 = 0.0630$ ,  $wR2 = 0.1706$ ; ; the thermal ellipsoids are set at a 30% probability level.

## 12. References

- 1) Chatupheeraphat, A.; Rueping, M. & Magre, M. *Org. Lett.* **2019**, *21*, 9153-9157.
- 2) Li, Q.; Yu, L.; Wei, Y. & Shi, M. *J. Org. Chem.* **2019**, *84*, 9282-9296.
- 3) Fang, B.; Hou, J.; Tian, J.; Yu, W. & Chang, J. *Org. Biomol. Chem.* **2020**, *18*, 3312-3323.
- 4) Zhang, Z.; Kvasovs, N.; Dubrovina, A. & Gevorgyan, V. *Angew. Chem. Int. Ed.* **2022**, *61*, e202110924.
- 5) Ortgies, S. & Breder, A. *Org. Lett.* **2015**, *17*, 2748-2751.
- 6) Tr  n, K.; Hauwe, R. V. D.; Sainsily, X.; Couvineau, P.; C  t  , J.; Simard, L.; Echevarria, M.; Murza, A.; Serre, A.; Th  roux, L.; Saibi, S.; Haroune, L.; Longpr  , J. -M.; Lesur, O.; Auger-Messier, M.; Spino, C.; Bouvier, M.; Sarret, P.; Ballet, S. & Marsault,   . *J. Med.Chem.* **2021**, *64*, 5345-5364.
- 7) Sun, W.; Chen, C.; Qi, Y.; Zhao, J.; Bao, Y. & Zhu, B. *Org. Biomol. Chem.* **2019**, *17*, 8358-8363.
- 8) Hill, J.; Hettikankanamalage, A. A. & Crich, D. *J. Am. Chem. Soc.* **2020**, *142*, 14820-14825.
- 9) Jang, Y. H. & Youn, S. W. *Org. Lett.* **2014**, *16*, 3720-3723.
- 10) Liu, J.; Wei, Y. & Shi, M. *Angew. Chem. Int. Ed.* **2021**, *60*, 12053-12059.
- 11) Guo, Z. -Q.; Xu, H.; Wang, X.; Wang, Z. -Y.; Ma, B. & Dai, H. -X. *Chem. Commun.* **2021**, *57*, 9716-9719.
- 12) Ghorai, J.; Reddy, A. C. S. & Anbarasan, P. *Chem. Asian J.* **2018**, *13*, 2499-2504.
- 13) Barluenga, J.; Fern  ndez, M. A.; Aznar, F.; Vald  s, C. *Chem. Eur. J.* **2005**, *11*, 2276-2283.
- 14) Bering, L.; Paulussen, F. M. & Antonchick, A. P. *Org. Lett.* **2018**, *20*, 1978-1981.
- 15) Ghorai, J.; Reddy, A. C. S. & Anbarasan, P. *Chem. Eur. J.* **2016**, *22*, 16042-16046.
- 16) Dou, X.; Yao, W.; Wen S. & Lu, Y. *Chem. Commun.* **2014**, *50*, 9469-9472.
- 17) Grimme, xtb 6.0; Mulliken Center for Theoretical Chemistry, University of Bonn, **2019**; available upon request via e-mail to xtb@thch.uni-bonn.de.
- 18) Marcus, R. A. *J. Chem. Phys.* **1957**, *26*, 872-876.
